# Supplementary material for: Deep learning-based behavioral profiling of rodent stroke recovery
Source: PubMed Central journal article supplement (PMC9571460; doi:10.1186/s12915-022-01434-9), 2022-10-15
Supplement: 12915_2022_1434_MOESM2_ESM.pdf [file 12915_2022_1434_MOESM2_ESM.pdf]

**Suppl. Table 1: Name and description of all generated parameters following runway performance**

| No | Parameter Cluster                     | Parameter Name                        | Parameter Description                                                                                              | Calculation                                                                                                   | Formula Explanation                                                                                                                                                                      |
|----|---------------------------------------|---------------------------------------|--------------------------------------------------------------------------------------------------------------------|---------------------------------------------------------------------------------------------------------------|------------------------------------------------------------------------------------------------------------------------------------------------------------------------------------------|
| 1  | synchronization and temporal features | average duration                      | average duration to perform a total step with all four paws, (s)                                                   | $\text{average}(\text{time}(\text{Step}(X)) - \text{time}(\text{Step}(X-1)))$                                 | Average time between Step X and the previous Step X-1                                                                                                                                    |
| 2  |                                       | average stance time                   | average stance time during a step, (s)                                                                             | $\text{average}(\text{time}(\text{StanceEnd}(X)) - \text{time}(\text{StanceBegin}(X)))$                       | Average time required for a stance (StanceEnd - StanceBegin) during one step                                                                                                             |
| 3  |                                       | average swing time                    | average swing time during a step, (s)                                                                              | $\text{average}(\text{time}(\text{SwingEnd}(X)) - \text{time}(\text{SwingBegin}(X)))$                         | Average time required for a swing (SwingEnd - SwingBegin) during one step                                                                                                                |
| 4  |                                       | left back duration                    | average duration of a step in the left back paw (LB), (s)                                                          | $\text{average}(\text{time}(\text{StepLB}(X)) - \text{time}(\text{StepLB}(X-1)))$                             | Average time between Step X and the previous Step X-1 of left back paw                                                                                                                   |
| 5  |                                       | left front duration                   | average duration of a step in the left front paw (LF), (s)                                                         | $\text{average}(\text{time}(\text{StepLF}(X)) - \text{time}(\text{StepLF}(X-1)))$                             | Average time between Step X and the previous Step X-1 of left front paw                                                                                                                  |
| 6  |                                       | right back duration                   | average duration of a step in the right back paw (RB), (s)                                                         | $\text{average}(\text{time}(\text{StepRB}(X)) - \text{time}(\text{StepRB}(X-1)))$                             | Average time between Step X and the previous Step X-1 of right back paw                                                                                                                  |
| 7  |                                       | right front duration                  | average duration of a step in the right front paw (RF), (s)                                                        | $\text{average}(\text{time}(\text{StepRF}(X)) - \text{time}(\text{StepRF}(X-1)))$                             | Average time between Step X and the previous Step X-1 of right front paw                                                                                                                 |
| 8  |                                       | average stride length                 | average length of a step from down view, (mm)                                                                      | $\text{average}(\text{length}(\text{Step}(X)) - \text{length}(\text{Step}(X-1)))$                             | Average distance covered between Step X and the previous Step X-1                                                                                                                        |
| 9  |                                       | left front back right synchronization | asynchronization ratio between left front paw (LF) and right back paw (RB), 0 = complete symmetry, normal gait (-) | $\text{asyncLFRB} = 1 - \frac{\text{time}(\text{syncLFRB})}{\text{time}(\text{syncLFRB} + \text{asyncLFRB})}$ | Normal gait: synchronization of stance phase LF+RB and RF+LB. Asynchronization ratio is 1 - the time stance of LFRB was synchronized divided by total stance time (syncLFRB + asyncLFRB) |
| 10 |                                       | right front back left synchronization | asynchronization ratio between right front paw (RF) and left back paw (LB), 0 = complete symmetry, normal gait (-) | $\text{asyncRFLB} = 1 - \frac{\text{time}(\text{syncRFLB})}{\text{time}(\text{syncRFLB} + \text{asyncRFLB})}$ | Normal gait: synchronization of stance phase LF+RB and RF+LB. Asynchronization ratio is 1 - the time stance of RFLB was synchronized divided by total stance time (syncRFLB + asyncRFLB) |

|    |                                            |                                                                                                      |                                                                                                         |                                                                                                                                      |                                                                                                                                      |
|----|--------------------------------------------|------------------------------------------------------------------------------------------------------|---------------------------------------------------------------------------------------------------------|--------------------------------------------------------------------------------------------------------------------------------------|--------------------------------------------------------------------------------------------------------------------------------------|
| 11 | <b>vertical joint movement and heights</b> | left back ankle average height                                                                       | average height changes during a step of the left back ankle compared to baseline = 0, (mm)              | $\text{average}(\text{height of body part}) / \text{Step}$                                                                           | Average relative height /y-axis coordinate of body part per step. (normalized to baseline)                                           |
| 12 |                                            | left back ankle vertical movement                                                                    | total vertical movement changes during a step of the left back ankle compared to baseline = 0, (mm)     | $\text{max}(\text{height of body part}) - \text{min}(\text{height of body part}) / \text{Step}$                                      | Vertical movement is the highest position of the body part during a step subtracted by the lowest position. (normalized to baseline) |
| 13 |                                            | left back toe tip average height                                                                     | average height changes during a step of the left back toe tip compared to baseline = 0, (mm)            | $\text{average}(\text{height of body part}) / \text{Step}$                                                                           | Average relative height /y-axis coordinate of body part per step. (normalized to baseline)                                           |
| 14 |                                            | left back toe tip vertical movement                                                                  | total vertical movement changes during a step of the left back toe tip compared to baseline = 0, (mm)   | $\text{max}(\text{height of body part}) - \text{min}(\text{height of body part}) / \text{Step}$                                      | Vertical movement is the highest position of the body part during a step subtracted by the lowest position. (normalized to baseline) |
| 15 |                                            | left front toe tip average height                                                                    | average height changes during a step of the left front toe tip compared to baseline = 0, (mm)           | $\text{average}(\text{height of body part}) / \text{Step}$                                                                           | Average relative height /y-axis coordinate of body part per step. (normalized to baseline)                                           |
| 16 |                                            | left front toe tip vertical movement                                                                 | total vertical movement changes during a step of the left front toe tip compared to baseline = 0, (mm)  | $\text{max}(\text{height of body part}) - \text{min}(\text{height of body part}) / \text{Step}$                                      | Vertical movement is the highest position of the body part during a step subtracted by the lowest position. (normalized to baseline) |
| 17 |                                            | left head average height                                                                             | average height changes during a step of the head from left side compared to baseline = 0, (mm)          | $\text{average}(\text{height of body part}) / \text{Step}$                                                                           | Average relative height /y-axis coordinate of body part per step. (normalized to baseline)                                           |
| 18 |                                            | left head vertical movement                                                                          | total vertical movement changes during a step of the head from left side compared to baseline = 0, (mm) | $\text{max}(\text{height of body part}) - \text{min}(\text{height of body part}) / \text{Step}$                                      | Vertical movement is the highest position of the body part during a step subtracted by the lowest position. (normalized to baseline) |
| 19 |                                            | left hip average height                                                                              | average height changes during a step of the left hip compared to baseline = 0, (mm)                     | $\text{average}(\text{height of body part}) / \text{Step}$                                                                           | Average relative height /y-axis coordinate of body part per step. (normalized to baseline)                                           |
| 20 |                                            | left hip vertical movement                                                                           | total vertical movement changes during a step of the left hip compared to baseline = 0, (mm)            | $\text{max}(\text{height of body part}) - \text{min}(\text{height of body part}) / \text{Step}$                                      | Vertical movement is the highest position of the body part during a step subtracted by the lowest position. (normalized to baseline) |
| 21 | left iliac crest average height            | average height changes during a step of the left iliac crest compared to baseline = 0, (mm)          | $\text{average}(\text{height of body part}) / \text{Step}$                                              | Average relative height /y-axis coordinate of body part per step. (normalized to baseline)                                           |                                                                                                                                      |
| 22 | left iliac crest vertical movement         | total vertical movement changes during a step of the left iliac crest compared to baseline = 0, (mm) | $\text{max}(\text{height of body part}) - \text{min}(\text{height of body part}) / \text{Step}$         | Vertical movement is the highest position of the body part during a step subtracted by the lowest position. (normalized to baseline) |                                                                                                                                      |

|    |                                            |                                                                                                          |                                                                                                         |                                                                                                                                      |                                                                                                                                      |
|----|--------------------------------------------|----------------------------------------------------------------------------------------------------------|---------------------------------------------------------------------------------------------------------|--------------------------------------------------------------------------------------------------------------------------------------|--------------------------------------------------------------------------------------------------------------------------------------|
| 23 | <b>vertical joint movement and heights</b> | left tail base average height                                                                            | average height changes during a step of the left tail base compared to baseline = 0, (mm)               | $\text{average}(\text{height of body part}) / \text{Step}$                                                                           | Average relative height /y-axis coordinate of body part per step. (normalized to baseline)                                           |
| 24 |                                            | left tail base vertical movement                                                                         | total vertical movement changes during a step of the left tail base compared to baseline = 0, (mm)      | $\text{max}(\text{height of body part}) - \text{min}(\text{height of body part}) / \text{Step}$                                      | Vertical movement is the highest position of the body part during a step subtracted by the lowest position. (normalized to baseline) |
| 25 |                                            | left wrist average height                                                                                | average height changes during a step of the left wrist compared to baseline = 0, (mm)                   | $\text{average}(\text{height of body part}) / \text{Step}$                                                                           | Average relative height /y-axis coordinate of body part per step. (normalized to baseline)                                           |
| 26 |                                            | left wrist vertical movement                                                                             | total vertical movement changes during a step of the left wrist compared to baseline = 0, (mm)          | $\text{max}(\text{height of body part}) - \text{min}(\text{height of body part}) / \text{Step}$                                      | Vertical movement is the highest position of the body part during a step subtracted by the lowest position. (normalized to baseline) |
| 27 |                                            | right back ankle average height                                                                          | average height changes during a step of the right back ankle compared to baseline = 0, (mm)             | $\text{average}(\text{height of body part}) / \text{Step}$                                                                           | Average relative height /y-axis coordinate of body part per step. (normalized to baseline)                                           |
| 28 |                                            | right back ankle vertical movement                                                                       | total vertical movement changes during a step of the left back ankle compared to baseline = 0, (mm)     | $\text{max}(\text{height of body part}) - \text{min}(\text{height of body part}) / \text{Step}$                                      | Vertical movement is the highest position of the body part during a step subtracted by the lowest position. (normalized to baseline) |
| 29 |                                            | right back toe tip average height                                                                        | average height changes during a step of the right back toe tip compared to baseline = 0, (mm)           | $\text{average}(\text{height of body part}) / \text{Step}$                                                                           | Average relative height /y-axis coordinate of body part per step. (normalized to baseline)                                           |
| 30 |                                            | right back toe tip vertical movement                                                                     | total vertical movement changes during a step of the right back toe tip compared to baseline = 0, (mm)  | $\text{max}(\text{height of body part}) - \text{min}(\text{height of body part}) / \text{Step}$                                      | Vertical movement is the highest position of the body part during a step subtracted by the lowest position. (normalized to baseline) |
| 31 |                                            | right front toe tip average height                                                                       | average height changes during a step of the right front toe tip compared to baseline = 0, (mm)          | $\text{average}(\text{height of body part}) / \text{Step}$                                                                           | Average relative height /y-axis coordinate of body part per step. (normalized to baseline)                                           |
| 32 |                                            | right front toe tip vertical movement                                                                    | total vertical movement changes during a step of the right front toe tip compared to baseline = 0, (mm) | $\text{max}(\text{height of body part}) - \text{min}(\text{height of body part}) / \text{Step}$                                      | Vertical movement is the highest position of the body part during a step subtracted by the lowest position. (normalized to baseline) |
| 33 | right head average height                  | average height changes during a step of the head from right side compared to baseline = 0, (mm)          | $\text{average}(\text{height of body part}) / \text{Step}$                                              | Average relative height /y-axis coordinate of body part per step. (normalized to baseline)                                           |                                                                                                                                      |
| 34 | right head vertical movement               | total vertical movement changes during a step of the head from right side compared to baseline = 0, (mm) | $\text{max}(\text{height of body part}) - \text{min}(\text{height of body part}) / \text{Step}$         | Vertical movement is the highest position of the body part during a step subtracted by the lowest position. (normalized to baseline) |                                                                                                                                      |
| 35 | right hip average height                   | average height changes during a step of the right hip compared to baseline = 0, (mm)                     | $\text{average}(\text{height of body part}) / \text{Step}$                                              | Average relative height /y-axis coordinate of body part per step. (normalized to baseline)                                           |                                                                                                                                      |

|    |                                            |                                                |                                                                                                       |                                                                                     |                                                                                                                                           |
|----|--------------------------------------------|------------------------------------------------|-------------------------------------------------------------------------------------------------------|-------------------------------------------------------------------------------------|-------------------------------------------------------------------------------------------------------------------------------------------|
| 36 | <b>vertical joint movement and heights</b> | right hip vertical movement                    | total vertical movement changes during a step of the right hip compared to baseline = 0, (mm)         | $\max(\text{height of body part}) - \min(\text{height of body part}) / \text{Step}$ | Vertical movement is the highest position of the body part during a step subtracted by the lowest position. (normalized to baseline)      |
| 37 |                                            | right iliac crest average height               | average height changes during a step of the right iliac crest compared to baseline = 0, (mm)          | $\text{average}((\text{height of body part})) / \text{Step}$                        | Average relative height /y-axis coordinate of body part per step. (normalized to baseline)                                                |
| 38 |                                            | right iliac crest vertical movement            | total vertical movement changes during a step of the right iliac crest compared to baseline = 0, (mm) | $\max(\text{height of body part}) - \min(\text{height of body part}) / \text{Step}$ | Vertical movement is the highest position of the body part during a step subtracted by the lowest position. (normalized to baseline)      |
| 39 |                                            | right tail base average height                 | average height changes during a step of the right tail base compared to baseline = 0, (mm)            | $\text{average}((\text{height of body part})) / \text{Step}$                        | Average relative height /y-axis coordinate of body part per step. (normalized to baseline)                                                |
| 40 |                                            | right tail base vertical movement              | total vertical movement changes during a step of the right tail base compared to baseline = 0, (mm)   | $\max(\text{height of body part}) - \min(\text{height of body part}) / \text{Step}$ | Vertical movement is the highest position of the body part during a step subtracted by the lowest position. (normalized to baseline)      |
| 41 |                                            | right wrist average height                     | average height changes during a step of the right wrist compared to baseline = 0, (mm)                | $\text{average}((\text{height of body part})) / \text{Step}$                        | Average relative height /y-axis coordinate of body part per step. (normalized to baseline)                                                |
| 42 |                                            | right wrist vertical movement                  | total vertical movement changes during a step of the right wrist compared to baseline = 0, (mm)       | $\max(\text{height of body part}) - \min(\text{height of body part}) / \text{Step}$ | Vertical movement is the highest position of the body part during a step subtracted by the lowest position. (normalized to baseline)      |
| 43 |                                            | <b>step length, protraction and retraction</b> | left back average length                                                                              | average length of a step of the left back paw (LB) compared to baseline = 0, (mm)   | $\text{average}(\text{distance}(\text{EndStepLB}-\text{BeginnStepLB}))$                                                                   |
| 44 | left back median length                    |                                                | median length of a step of the left back paw (LB) compared to baseline = 0, (mm)                      | $\text{median}(\text{distance}(\text{EndStepLB}-\text{BeginnStepLB}))$              | Median distance/x-axis coordinates covered by left back paw during one step                                                               |
| 45 | left back total horizontal movement        |                                                | total horizontal movement during a step of the left back paw (LB) compared to baseline = 0, (mm)      | $\max(\text{distance}(\text{EndStepLB}-\text{BeginnStepLB}))$                       | Max distance/x-axis coordinates covered by left back paw during one step                                                                  |
| 46 | left back protraction max                  |                                                | maximum protractive movement during a step of the left back paw (LB) compared to baseline = 0, (mm)   | $\max(\text{distance}(\text{EndProtractStepLB}-\text{BeginnProtractStepLB}))$       | Protraction is defined when x-coordinates between 2 frames was positive. Max distance covered by left back paw during protraction of step |
| 47 | left back retraction max                   |                                                | maximum retractive movement during a step of the left back paw (LB) compared to baseline = 0, (mm)    | $\max(\text{distance}(\text{EndRetractStepLB}-\text{BeginnRetractStepLB}))$         | Retraction is defined when x-coordinates between 2 frames was negative. Max distance covered by left back paw during retraction of step   |
| 48 | left front average length                  |                                                | average length of a step of the left front paw (LF) compared to baseline = 0, (mm)                    | $\text{average}(\text{distance}(\text{EndStepLF}-\text{BeginnStepLF}))$             | Average distance/x-axis coordinates covered by left front paw during one step                                                             |

|    |                                                |                                       |                                                                                                       |                                                       |                                                                                                                                             |
|----|------------------------------------------------|---------------------------------------|-------------------------------------------------------------------------------------------------------|-------------------------------------------------------|---------------------------------------------------------------------------------------------------------------------------------------------|
| 49 | <b>step length, protraction and retraction</b> | left front median length              | median length of a step of the left front paw (LF) compared to baseline = 0, (mm)                     | median(distance(EndStepLF-BeginnStepLF))              | Median distance/x-axis coordinates covered by left front paw during one step                                                                |
| 50 |                                                | left front total horizontal movement  | total horizontal movement during a step of the left front paw (LF) compared to baseline = 0, (mm)     | max(distance(EndStepLF-BeginnStepLF))                 | Max distance/x-axis coordinates covered by left front paw during one step                                                                   |
| 51 |                                                | left front protraction max            | maximum protractive movement during a step of the left front paw (LF) compared to baseline = 0, (mm)  | max(distance(EndProtractStepLF-BeginnProtractStepLF)) | Protraction is defined when x-coordinates between 2 frames was positive. Max distance covered by left front paw during protraction of step  |
| 52 |                                                | left front retraction max             | maximum retractive movement during a step of the left front paw (LF) compared to baseline = 0, (mm)   | max(distance(EndRetractStepLF-BeginnRetractStepLF))   | Retraction is defined when x-coordinates between 2 frames was negative. Max distance covered by left front paw during retraction of step    |
| 53 |                                                | right back average length             | average length of a step of the right back paw (RB) compared to baseline = 0, (mm)                    | average(distance(EndStepRB-BeginnStepLF))             | Average distance/x-axis coordinates covered by right back paw during one step                                                               |
| 54 |                                                | right back median length              | median length of a step of the right back paw (RB) compared to baseline = 0, (mm)                     | median(distance(EndStepRB-BeginnStepRB))              | Median distance/x-axis coordinates covered by right back paw during one step                                                                |
| 55 |                                                | right back total horizontal movement  | total horizontal movement during a step of the right back paw (RB) compared to baseline = 0, (mm)     | max(distance(EndStepRB-BeginnStepRB))                 | Max distance/x-axis coordinates covered by right back paw during one step                                                                   |
| 56 |                                                | right back protraction max            | maximum protractive movement during a step of the right back paw (RB) compared to baseline = 0, (mm)  | max(distance(EndProtractStepRB-BeginnProtractStepRB)) | Protraction is defined when x-coordinates between 2 frames was positive. Max distance covered by right back paw during protraction of step  |
| 57 |                                                | right back retraction max             | maximum retractive movement during a step of the right back paw (RB) compared to baseline = 0, (mm)   | max(distance(EndRetractStepRB-BeginnRetractStepRB))   | Retraction is defined when x-coordinates between 2 frames was negative. Max distance covered by right back paw during retraction of step    |
| 58 |                                                | right front average length            | average length of a step of the right front paw (RF) compared to baseline = 0, (mm)                   | average(distance(EndStepRF-BeginnStepRF))             | Average distance/x-axis coordinates covered by right front paw during one step                                                              |
| 59 |                                                | right front median length             | median length of a step of the right front paw (RF) compared to baseline = 0, (mm)                    | median(distance(EndStepRF-BeginnStepRF))              | Median distance/x-axis coordinates covered by right front paw during one step                                                               |
| 60 |                                                | right front total horizontal movement | total horizontal movement during a step of the right front paw (RF) compared to baseline = 0, (mm)    | max(distance(EndStepRF-BeginnStepRF))                 | Max distance/x-axis coordinates covered by right front paw during one step                                                                  |
| 61 |                                                | right front protraction max           | maximum protractive movement during a step of the right front paw (RF) compared to baseline = 0, (mm) | max(distance(EndProtractStepRF-BeginnProtractStepRF)) | Protraction is defined when x-coordinates between 2 frames was positive. Max distance covered by right front paw during protraction of step |

|    |                                  |                                           |                                                                                                        |                                                                                                    |                                                                                                                                           |
|----|----------------------------------|-------------------------------------------|--------------------------------------------------------------------------------------------------------|----------------------------------------------------------------------------------------------------|-------------------------------------------------------------------------------------------------------------------------------------------|
| 62 |                                  | right front retraction max                | maximum retractive movement during a step of the right front paw (RF) compared to baseline = 0, (mm)   | $\max(\text{distance}(\text{EndRetractStepRF} - \text{BeginnRetractStepRF}))$                      | Retraction is defined when x-coordinates between 2 frames was negative. Max distance covered by right front paw during retraction of step |
| 63 |                                  | left hip total horizontal movement        | total horizontal movement during a step of the left hip compared to baseline = 0, (mm)                 | $\max(\text{distance}(\text{EndStepLeftHip} - \text{BeginnStepLeftHip}))$                          | Max distance/x-axis coordinates covered by left hip during one step                                                                       |
| 64 |                                  | left hip average length                   | average distance covered by the left hip during a step compared to baseline = 0, (mm)                  | $\text{average}(\text{distance}(\text{EndStepLeftHip} - \text{BeginnStepLeftHip}))$                | Average distance/x-axis coordinates covered by left hip during one step                                                                   |
| 65 |                                  | left tail base total horizontal movement  | total horizontal movement during a step of the left tail base compared to baseline = 0, (mm)           | $\max(\text{distance}(\text{EndStepLeftTail} - \text{BeginnStepLeftTail}))$                        | Max distance/x-axis coordinates covered by left tail base during one step                                                                 |
| 66 |                                  | left tail base average length             | average distance covered by the left tail base during a step compared to baseline = 0, (mm)            | $\text{average}(\text{distance}(\text{EndStepLeftTail} - \text{BeginnStepLeftTail}))$              | Average distance/x-axis coordinates covered by left tail base during one step                                                             |
| 67 |                                  | right hip total horizontal movement       | total horizontal movement during a step of the right hip compared to baseline = 0, (mm)                | $\max(\text{distance}(\text{EndStepRightHip} - \text{BeginnStepRightHip}))$                        | Max distance/x-axis coordinates covered by right hip during one step                                                                      |
| 68 |                                  | right hip average length                  | average distance covered by the right hip during a step compared to baseline = 0, (mm)                 | $\text{average}(\text{distance}(\text{EndStepRightHip} - \text{BeginnStepRightHip}))$              | Average distance/x-axis coordinates covered by right hip during one step                                                                  |
| 69 |                                  | right tail base total horizontal movement | total horizontal movement during a step of the right tail base compared to baseline = 0, (mm)          | $\max(\text{distance}(\text{EndStepRightTail} - \text{BeginnStepRightTail}))$                      | Max distance/x-axis coordinates covered by right tail base during one step                                                                |
| 70 |                                  | right tail base average length            | average distance covered by the right tail base during a step compared to baseline = 0, (mm)           | $\text{average}(\text{distance}(\text{EndStepRightTail} - \text{BeginnStepRightTail}))$            | Average distance/x-axis coordinates covered by right tail base during one step                                                            |
| 71 | <b>paw to body center angles</b> | left back average angle                   | average angle between body center back (CB) and left back paw (LB) during a step from down view, (°)   | $\text{average}(\text{atan2}(\text{LB.y} - \text{CB.y}, \text{LB.x} - \text{CB.x})) / \text{Step}$ | Arctan was used to calculate angle between the landmark coordinates (X/Y) of body center and paw. Average angle was calculated per step.  |
| 72 |                                  | left back max angle                       | maximum angle between body center back (CB) and left back paw (LB) during a step from down view, (°)   | $\max(\text{atan2}(\text{LB.y} - \text{CB.y}, \text{LB.x} - \text{CB.x})) / \text{Step}$           | Arctan was used to calculate angle between the landmark coordinates (X/Y) of body center and paw. Max angle was calculated per step.      |
| 73 |                                  | left back min angle                       | minimum angle between body center back (CB) and left back paw (LB) during a step from down view, (°)   | $\min(\text{atan2}(\text{LB.y} - \text{CB.y}, \text{LB.x} - \text{CB.x})) / \text{Step}$           | Arctan was used to calculate angle between the landmark coordinates (X/Y) of body center and paw. Min angle was calculated per step.      |
| 74 |                                  | left front average angle                  | average angle between body center front (CF) and left front paw (LF) during a step from down view, (°) | $\text{average}(\text{atan2}(\text{LF.y} - \text{BC.y}, \text{LF.x} - \text{BC.x})) / \text{Step}$ | Arctan was used to calculate angle between the landmark coordinates (X/Y) of body center and paw. Average angle was calculated per step.  |

|    |                                  |                                               |                                                                                                         |                                                                                                                                                                                                                               |                                                                                                                                                                  |
|----|----------------------------------|-----------------------------------------------|---------------------------------------------------------------------------------------------------------|-------------------------------------------------------------------------------------------------------------------------------------------------------------------------------------------------------------------------------|------------------------------------------------------------------------------------------------------------------------------------------------------------------|
| 75 | <b>paw to body center angles</b> | left front max angle                          | maximum angle between body center front (CF) and left front paw (LF) during a step from down view, (°)  | $\max(\text{atan2}(\text{LF.y} - \text{BC.y}, \text{LF.x} - \text{BC.x})) / \text{Step}$                                                                                                                                      | Arctan was used to calculate angle between the landmark coordinates (X/Y) of body center and paw. Max angle was calculated per step.                             |
| 76 |                                  | left front min angle                          | minimum angle between body center front (CF) and left front paw (LF) during a step from down view, (°)  | $\min(\text{atan2}(\text{LF.y} - \text{BC.y}, \text{LF.x} - \text{BC.x})) / \text{Step}$                                                                                                                                      | Arctan was used to calculate angle between the landmark coordinates (X/Y) of body center and paw. Min angle was calculated per step.                             |
| 77 |                                  | right back average angle                      | average angle between body center back (CB) and right back paw (RB) during a step from down view, (°)   | $\text{average}(\text{atan2}(\text{RB.y} - \text{CB.y}, \text{RB.x} - \text{CB.x})) / \text{Step}$                                                                                                                            | Arctan was used to calculate angle between the landmark coordinates (X/Y) of body center and paw. Average angle was calculated per step.                         |
| 78 |                                  | right back max angle                          | maximum angle between body center back (CB) and right back paw (RB) during a step from down view, (°)   | $\max(\text{atan2}(\text{RB.y} - \text{CB.y}, \text{RB.x} - \text{CB.x})) / \text{Step}$                                                                                                                                      | Arctan was used to calculate angle between the landmark coordinates (X/Y) of body center and paw. Max angle was calculated per step.                             |
| 79 |                                  | right back min angle                          | minimum angle between body center back (CB) and right back paw (RB) during a step from down view, (°)   | $\min(\text{atan2}(\text{RB.y} - \text{CB.y}, \text{RB.x} - \text{CB.x})) / \text{Step}$                                                                                                                                      | Arctan was used to calculate angle between the landmark coordinates (X/Y) of body center and paw. Min angle was calculated per step.                             |
| 80 |                                  | right front average angle                     | average angle between body center front (CF) and right front paw (RF) during a step from down view, (°) | $\text{average}(\text{atan2}(\text{RF.y} - \text{BC.y}, \text{RF.x} - \text{BC.x})) / \text{Step}$                                                                                                                            | Arctan was used to calculate angle between the landmark coordinates (X/Y) of body center and paw. Average angle was calculated per step.                         |
| 81 |                                  | right front max angle                         | maximum angle between body center front (CF) and right front paw (RF) during a step from down view, (°) | $\max(\text{atan2}(\text{RF.y} - \text{BC.y}, \text{RF.x} - \text{BC.x})) / \text{Step}$                                                                                                                                      | Arctan was used to calculate angle between the landmark coordinates (X/Y) of body center and paw. Max angle was calculated per step.                             |
| 82 |                                  | right front min angle                         | minimum angle between body center front (CF) and right front paw (RF) during a step from down view, (°) | $\min(\text{atan2}(\text{RF.y} - \text{BC.y}, \text{RF.x} - \text{BC.x})) / \text{Step}$                                                                                                                                      | Arctan was used to calculate angle between the landmark coordinates (X/Y) of body center and paw. Min angle was calculated per step.                             |
| 83 | <b>joint angles</b>              | average angle left back hip ankle toe         | average angle between left hip, left back ankle and left back toe tip during a step from side view, (°) | $\text{average}(\text{atan2}((\text{back-toe.y} - \text{back-ankle.y}), (\text{back-toe.x} - \text{back-ankle.x})) - \text{atan2}((\text{hip.y} - \text{back-ankle.y}), (\text{hip.x} - \text{back-ankle.x}))) / \text{Step}$ | Arctan was used to calculate angle between the three left landmark coordinates (X/Y) of hip, back ankle and back toe tip. Average angle was calculated per step. |
| 84 |                                  | average angle left back iliac hip ankle       | average angle between left iliac crest, left hip and left back ankle during a step from side view, (°)  | $\text{average}(\text{atan2}((\text{back-ankle.y} - \text{hip.y}), (\text{back-ankle.x} - \text{hip.x})) - \text{atan2}((\text{iliac-crest.y} - \text{hip.y}), (\text{iliac-crest.x} - \text{hip.x}))) / \text{Step}$         | Arctan was used to calculate angle between the three left landmark coordinates (X/Y) of iliac-crest, hip, back ankle. Average angle was calculated per step.     |
| 85 |                                  | average angle left front elbow wrist toetip   | average angle between left elbow, left wrist and left front toe tip during a step from side view, (°)   | $\text{average}(\text{atan2}((\text{front-toe-tip.y} - \text{wrist.y}), (\text{front-toe-tip.x} - \text{wrist.x})) - \text{atan2}((\text{elbow.y} - \text{wrist.y}), (\text{elbow.x} - \text{wrist.x}))) / \text{Step}$       | Arctan was used to calculate angle between the three left landmark coordinates (X/Y) of elbow, wrist, front toe tip. Average angle was calculated per step.      |
| 86 |                                  | average angle left front shoulder elbow wrist | average angle between left shoulder, left elbow and left wrist during a step from side view, (°)        | $\text{average}(\text{atan2}((\text{wrist.y} - \text{elbow.y}), (\text{wrist.x} - \text{elbow.x})) - \text{atan2}((\text{shoulder.y} - \text{elbow.y}), (\text{shoulder.x} - \text{elbow.x}))) / \text{Step}$                 | Arctan was used to calculate angle between the three left landmark coordinates (X/Y) of shoulder, elbow, wrist. Average angle was calculated per step.           |
| 87 |                                  | max left back hip ankle toe                   | maximum angle between left hip, left back ankle and left back toe tip during a step from side view, (°) | $\max(\text{atan2}((\text{back-toe.y} - \text{back-ankle.y}), (\text{back-toe.x} - \text{back-ankle.x})) - \text{atan2}((\text{hip.y} - \text{back-ankle.y}), (\text{hip.x} - \text{back-ankle.x}))) / \text{Step}$           | Arctan was used to calculate angle between the three left landmark coordinates (X/Y) of hip, back ankle and back toe tip. Max angle was calculated per step.     |

|     |                                                |                                                                                                            |                                                                                                                                                                             |                                                                                                                                                                                       |                                                                                                                                                                  |
|-----|------------------------------------------------|------------------------------------------------------------------------------------------------------------|-----------------------------------------------------------------------------------------------------------------------------------------------------------------------------|---------------------------------------------------------------------------------------------------------------------------------------------------------------------------------------|------------------------------------------------------------------------------------------------------------------------------------------------------------------|
| 88  | <b>joint angles</b>                            | max left back iliac hip ankle                                                                              | maximum angle between left iliac crest, left hip and left back ankle during a step from side view, (°)                                                                      | $\max(\text{atan2}(\text{back-ankle.y-hip.y}, (\text{back-ankle.x-hip.x})) - \text{atan2}(\text{iliac-crest.y-hip.y}, (\text{iliac-crest.x-hip.x}))) / \text{Step}$                   | Arctan was used to calculate angle between the three left landmark coordinates (X/Y) of iliac-crest, hip, back ankle. Max angle was calculated per step.         |
| 89  |                                                | max left front elbow wrist toetip                                                                          | maximum angle between left elbow, left wrist and left front toe tip during a step from side view, (°)                                                                       | $\max(\text{atan2}(\text{front-toe-tip.y-wrist.y}, (\text{front-toe-tip.x-wrist.x})) - \text{atan2}(\text{elbow.y-wrist.y}, (\text{elbow.x-wrist.x}))) / \text{Step}$                 | Arctan was used to calculate angle between the three left landmark coordinates (X/Y) of elbow, wrist, front toe tip. Max angle was calculated per step.          |
| 90  |                                                | max left front shoulder elbow wrist                                                                        | maximum angle between left shuolder, left elbow and left wrist during a step from side view, (°)                                                                            | $\max(\text{atan2}(\text{wrist.y-elbow.y}, (\text{wrist.x-elbow.x})) - \text{atan2}(\text{shoulder.y-elbow.y}, (\text{shoulder.x-elbow.x}))) / \text{Step}$                           | Arctan was used to calculate angle between the three left landmark coordinates (X/Y) of shoulder, elbow, wrist. Max angle was calculated per step.               |
| 91  |                                                | min left back hip ankle toe                                                                                | minimum angle between left hip, left back ankle and left back toe tip during a step from side view, (°)                                                                     | $\min(\text{atan2}(\text{back-toe.y-back-ankle.y}, (\text{back-toe.x-back-ankle.x})) - \text{atan2}(\text{hip.y-back-ankle.y}, (\text{hip.x-back-ankle.x}))) / \text{Step}$           | Arctan was used to calculate angle between the three left landmark coordinates (X/Y) of hip, back ankle and back toe tip. Min angle was calculated per step.     |
| 92  |                                                | min left back iliac hip ankle                                                                              | minimum angle between left iliac crest, left hip and left back ankle during a step from side view, (°)                                                                      | $\min(\text{atan2}(\text{back-ankle.y-hip.y}, (\text{back-ankle.x-hip.x})) - \text{atan2}(\text{iliac-crest.y-hip.y}, (\text{iliac-crest.x-hip.x}))) / \text{Step}$                   | Arctan was used to calculate angle between the three left landmark coordinates (X/Y) of iliac-crest, hip, back ankle. Min angle was calculated per step.         |
| 93  |                                                | min left front elbow wrist toetip                                                                          | minimum angle between left elbow, left wrist and left front toe tip during a step from side view, (°)                                                                       | $\min(\text{atan2}(\text{front-toe-tip.y-wrist.y}, (\text{front-toe-tip.x-wrist.x})) - \text{atan2}(\text{elbow.y-wrist.y}, (\text{elbow.x-wrist.x}))) / \text{Step}$                 | Arctan was used to calculate angle between the three left landmark coordinates (X/Y) of elbow, wrist, front toe tip. Min angle was calculated per step.          |
| 94  |                                                | min left front shoulder elbow wrist                                                                        | minimum angle between left shuolder, left elbow and left wrist during a step from side view, (°)                                                                            | $\min(\text{atan2}(\text{wrist.y-elbow.y}, (\text{wrist.x-elbow.x})) - \text{atan2}(\text{shoulder.y-elbow.y}, (\text{shoulder.x-elbow.x}))) / \text{Step}$                           | Arctan was used to calculate angle between the three left landmark coordinates (X/Y) of shoulder, elbow, wrist. Min angle was calculated per step.               |
| 95  |                                                | average angle right back hip ankle toe                                                                     | average angle between right hip, right back ankle and right back toe tip during a step from side view, (°)                                                                  | $\text{average}(\text{atan2}(\text{back-toe.y-back-ankle.y}, (\text{back-toe.x-back-ankle.x})) - \text{atan2}(\text{hip.y-back-ankle.y}, (\text{hip.x-back-ankle.x}))) / \text{Step}$ | Arctan was used to calculate angle between the three left landmark coordinates (X/Y) of hip, back ankle and back toe tip. Average angle was calculated per step. |
| 96  |                                                | average angle right back iliac hip ankle                                                                   | average angle between right iliac crest, right hip and right back ankle during a step from side view, (°)                                                                   | $\text{average}(\text{atan2}(\text{back-ankle.y-hip.y}, (\text{back-ankle.x-hip.x})) - \text{atan2}(\text{iliac-crest.y-hip.y}, (\text{iliac-crest.x-hip.x}))) / \text{Step}$         | Arctan was used to calculate angle between the three right landmark coordinates (X/Y) of iliac-crest, hip, back ankle. Average angle was calculated per step.    |
| 97  |                                                | average angle right front elbow wrist toetip                                                               | average angle between right elbow, right wrist and right front toe tip during a step from side view, (°)                                                                    | $\text{average}(\text{atan2}(\text{front-toe-tip.y-wrist.y}, (\text{front-toe-tip.x-wrist.x})) - \text{atan2}(\text{elbow.y-wrist.y}, (\text{elbow.x-wrist.x}))) / \text{Step}$       | Arctan was used to calculate angle between the three right landmark coordinates (X/Y) of elbow, wrist, front toe tip. Average angle was calculated per step.     |
| 98  | average angle right front shoulder elbow wrist | average angle between right shuolder, right elbow and right wrist during a step from side view, (°)        | $\text{average}(\text{atan2}(\text{wrist.y-elbow.y}, (\text{wrist.x-elbow.x})) - \text{atan2}(\text{shoulder.y-elbow.y}, (\text{shoulder.x-elbow.x}))) / \text{Step}$       | Arctan was used to calculate angle between the three right landmark coordinates (X/Y) of shoulder, elbow, wrist. Average angle was calculated per step.                               |                                                                                                                                                                  |
| 99  | max right back hip ankle toe                   | maximum angle between right hip, right back ankle and right back toe tip during a step from side view, (°) | $\max(\text{atan2}(\text{back-toe.y-back-ankle.y}, (\text{back-toe.x-back-ankle.x})) - \text{atan2}(\text{hip.y-back-ankle.y}, (\text{hip.x-back-ankle.x}))) / \text{Step}$ | Arctan was used to calculate angle between the three right landmark coordinates (X/Y) of hip, back ankle and back toe tip. Max angle was calculated per step.                         |                                                                                                                                                                  |
| 100 | max right back iliac hip ankle                 | maximum angle between right iliac crest, right hip and right back ankle during a step from side view, (°)  | $\max(\text{atan2}(\text{back-ankle.y-hip.y}, (\text{back-ankle.x-hip.x})) - \text{atan2}(\text{iliac-crest.y-hip.y}, (\text{iliac-crest.x-hip.x}))) / \text{Step}$         | Arctan was used to calculate angle between the three right landmark coordinates (X/Y) of iliac-crest, hip, back ankle. Max angle was calculated per step.                             |                                                                                                                                                                  |



|     |                     |                                      |                                                                                                            |                                                                                                                                                                            |                                                                                                                                                               |
|-----|---------------------|--------------------------------------|------------------------------------------------------------------------------------------------------------|----------------------------------------------------------------------------------------------------------------------------------------------------------------------------|---------------------------------------------------------------------------------------------------------------------------------------------------------------|
| 101 | <b>joint angles</b> | max right front elbow wrist toetip   | maximum angle between right elbow, right wrist and right front toe tip during a step from side view, (°)   | $\max(\text{atan2}(\text{front-toe-tip.y-wrist.y}, (\text{front-toe-tip.x-wrist.x}) - \text{atan2}(\text{elbow.y-wrist.y}, (\text{elbow.x-wrist.x})) / \text{Step}$        | Arctan was used to calculate angle between the three right landmark coordinates (X/Y) of elbow, wrist, front toe tip. Max angle was calculated per step.      |
| 102 |                     | max right front shoulder elbow wrist | maximum angle between right shuolder, right elbow and right wrist during a step from side view, (°)        | $\max(\text{atan2}(\text{wrist.y-elbow.y}, (\text{wrist.x-elbow.x}) - \text{atan2}(\text{shoulder.y-elbow.y}, (\text{shoulder.x-elbow.x})) / \text{Step}$                  | Arctan was used to calculate angle between the three right landmark coordinates (X/Y) of shoulder, elbow, wrist. Max angle was calculated per step.           |
| 103 |                     | min right back hip ankle toe         | minimum angle between right hip, right back ankle and right back toe tip during a step from side view, (°) | $\min(\text{atan2}(\text{back-toe.y-back-ankle.y}, (\text{back-toe.x-back-ankle.x}) - \text{atan2}(\text{hip.y-back-ankle.y}, (\text{hip.x-back-ankle.x}))) / \text{Step}$ | Arctan was used to calculate angle between the three right landmark coordinates (X/Y) of hip, back ankle and back toe tip. Min angle was calculated per step. |
| 104 |                     | min right back iliac hip ankle       | minimum angle between right iliac crest, right hip and right back ankle during a step from side view, (°)  | $\min(\text{atan2}(\text{back-ankle.y-hip.y}, (\text{back-ankle.x-hip.x}) - \text{atan2}(\text{iliac-crest.y-hip.y}, (\text{iliac-crest.x-hip.x}))) / \text{Step}$         | Arctan was used to calculate angle between the three right landmark coordinates (X/Y) of iliac-crest, hip, back ankle. Min angle was calculated per step.     |
| 105 |                     | min right front elbow wrist toetip   | minimum angle between right elbow, right wrist and right front toe tip during a step from side view, (°)   | $\min(\text{atan2}(\text{front-toe-tip.y-wrist.y}, (\text{front-toe-tip.x-wrist.x}) - \text{atan2}(\text{elbow.y-wrist.y}, (\text{elbow.x-wrist.x})) / \text{Step}$        | Arctan was used to calculate angle between the three right landmark coordinates (X/Y) of elbow, wrist, front toe tip. Min angle was calculated per step.      |
| 106 |                     | min right front shoulder elbow wrist | minimum angle between right shuolder, right elbow and right wrist during a step from side view, (°)        | $\min(\text{atan2}(\text{wrist.y-elbow.y}, (\text{wrist.x-elbow.x}) - \text{atan2}(\text{shoulder.y-elbow.y}, (\text{shoulder.x-elbow.x})) / \text{Step}$                  | Arctan was used to calculate angle between the three right landmark coordinates (X/Y) of shoulder, elbow, wrist. Min angle was calculated per step.           |

**Suppl. Table 2: Overview of sample size for each experiment**

| <b>Overview</b>                                | <b>Description of experiment</b>            | <b>Sample size N</b> | <b>Sex</b> |
|------------------------------------------------|---------------------------------------------|----------------------|------------|
| <b>Validation of DeepLabCut set-up</b>         | C57Bl/6 (1st batch) for training, set-up    | 8                    | 4M / 4F    |
|                                                | C57Bl/6 (2nd batch) for validation, stroked | 13                   | 7M / 6F    |
|                                                | NSG (white fur)                             | 12                   | 6M/6F      |
| <b>Stroke confirmation and tissue analysis</b> | Laser Doppler Imaging                       | 8                    | 4M /4F     |
|                                                | Stroke size analysis                        | 8                    | 4M /4F     |
| <b>DeepLabCut analysis</b>                     | runway analysis                             | 8-13                 | 7M /6F     |
|                                                | ladder rung analysis                        | 8-13                 | 7M /6F     |
|                                                | Neurological score                          | 7*                   | 3M /4F     |
| <b>Conventional tests</b>                      | Rotarod                                     | 12*                  | 6M /6F     |
|                                                | Cylinder test                               | 12*                  | 6M /6F     |
|                                                | ladder rung test                            | 12*                  | 6M /6F     |
|                                                | single pellet grasping                      | 6*                   | 6F         |

\* different cohort

**Suppl. Table 3: Accuracy of labeling different mice during runway test**

| Group              | Parameter       | Likelihood  | Training Session   | Setup  |
|--------------------|-----------------|-------------|--------------------|--------|
| Bl6, original mice | d-back-left     | 100         | Original Session 1 | runway |
| Bl6, original mice | d-back-right    | 100         | Original Session 1 | runway |
| Bl6, original mice | d-front-left    | 100         | Original Session 1 | runway |
| Bl6, original mice | d-front-right   | 100         | Original Session 1 | runway |
| Bl6, original mice | d-head          | 100         | Original Session 1 | runway |
| Bl6, original mice | d-tail-base     | 100         | Original Session 1 | runway |
| Bl6, original mice | l-back-ankle    | 96.77419355 | Original Session 1 | runway |
| Bl6, original mice | l-back-toe      | 93.63057325 | Original Session 1 | runway |
| Bl6, original mice | l-elbow         | 100         | Original Session 1 | runway |
| Bl6, original mice | l-front-toe-tip | 98.125      | Original Session 1 | runway |
| Bl6, original mice | l-head          | 100         | Original Session 1 | runway |
| Bl6, original mice | l-hip           | 100         | Original Session 1 | runway |
| Bl6, original mice | l-iliac-crest   | 100         | Original Session 1 | runway |
| Bl6, original mice | l-shoulder      | 99.35483871 | Original Session 1 | runway |
| Bl6, original mice | l-tail-base     | 100         | Original Session 1 | runway |
| Bl6, original mice | l-wrist         | 100         | Original Session 1 | runway |
| Bl6, original mice | r-back-ankle    | 99.35483871 | Original Session 1 | runway |
| Bl6, original mice | r-back-toe      | 100         | Original Session 1 | runway |
| Bl6, original mice | r-elbow         | 100         | Original Session 1 | runway |
| Bl6, original mice | r-front-toe-tip | 96.73202614 | Original Session 1 | runway |
| Bl6, original mice | r-head          | 98.03921569 | Original Session 1 | runway |
| Bl6, original mice | r-hip           | 100         | Original Session 1 | runway |
| Bl6, original mice | r-iliac-crest   | 100         | Original Session 1 | runway |
| Bl6, original mice | r-shoulder      | 100         | Original Session 1 | runway |
| Bl6, original mice | r-tail-base     | 100         | Original Session 1 | runway |
| Bl6, original mice | r-wrist         | 99.35897436 | Original Session 1 | runway |
| Bl6, new mice      | d-back-left     | 100         | Original Session 1 | runway |
| Bl6, new mice      | d-back-right    | 100         | Original Session 1 | runway |
| Bl6, new mice      | d-front-left    | 100         | Original Session 1 | runway |
| Bl6, new mice      | d-front-right   | 100         | Original Session 1 | runway |
| Bl6, new mice      | d-head          | 100         | Original Session 1 | runway |
| Bl6, new mice      | d-tail-base     | 100         | Original Session 1 | runway |
| Bl6, new mice      | l-back-ankle    | 97.63313609 | Original Session 1 | runway |
| Bl6, new mice      | l-back-toe      | 92.89940828 | Original Session 1 | runway |
| Bl6, new mice      | l-elbow         | 100         | Original Session 1 | runway |
| Bl6, new mice      | l-front-toe-tip | 98.25581395 | Original Session 1 | runway |
| Bl6, new mice      | l-head          | 100         | Original Session 1 | runway |
| Bl6, new mice      | l-hip           | 100         | Original Session 1 | runway |
| Bl6, new mice      | l-iliac-crest   | 100         | Original Session 1 | runway |
| Bl6, new mice      | l-shoulder      | 100         | Original Session 1 | runway |
| Bl6, new mice      | l-tail-base     | 100         | Original Session 1 | runway |
| Bl6, new mice      | l-wrist         | 100         | Original Session 1 | runway |
| Bl6, new mice      | r-back-ankle    | 100         | Original Session 1 | runway |
| Bl6, new mice      | r-back-toe      | 100         | Original Session 1 | runway |
| Bl6, new mice      | r-elbow         | 100         | Original Session 1 | runway |
| Bl6, new mice      | r-front-toe-tip | 96.49122807 | Original Session 1 | runway |

|                |                 |             |                    |        |
|----------------|-----------------|-------------|--------------------|--------|
| Bl6, new mice  | r-head          | 100         | Original Session 1 | runway |
| Bl6, new mice  | r-hip           | 100         | Original Session 1 | runway |
| Bl6, new mice  | r-iliac-crest   | 100         | Original Session 1 | runway |
| Bl6, new mice  | r-shoulder      | 100         | Original Session 1 | runway |
| Bl6, new mice  | r-tail-base     | 100         | Original Session 1 | runway |
| Bl6, new mice  | r-wrist         | 99.42196532 | Original Session 1 | runway |
| NOD, white fur | d-back-left     | 41.11111111 | Original Session 1 | runway |
| NOD, white fur | d-back-right    | 17.87709497 | Original Session 1 | runway |
| NOD, white fur | d-front-left    | 0           | Original Session 1 | runway |
| NOD, white fur | d-front-right   | 0           | Original Session 1 | runway |
| NOD, white fur | d-head          | 1.886792453 | Original Session 1 | runway |
| NOD, white fur | d-tail-base     | 0           | Original Session 1 | runway |
| NOD, white fur | l-back-ankle    | 0           | Original Session 1 | runway |
| NOD, white fur | l-back-toe      | 0           | Original Session 1 | runway |
| NOD, white fur | l-elbow         | 0           | Original Session 1 | runway |
| NOD, white fur | l-front-toe-tip | 0           | Original Session 1 | runway |
| NOD, white fur | l-head          | 0           | Original Session 1 | runway |
| NOD, white fur | l-hip           | 0           | Original Session 1 | runway |
| NOD, white fur | l-iliac-crest   | 0           | Original Session 1 | runway |
| NOD, white fur | l-shoulder      | 0           | Original Session 1 | runway |
| NOD, white fur | l-tail-base     | 0           | Original Session 1 | runway |
| NOD, white fur | l-wrist         | 0           | Original Session 1 | runway |
| NOD, white fur | r-back-ankle    | 0           | Original Session 1 | runway |
| NOD, white fur | r-back-toe      | 0           | Original Session 1 | runway |
| NOD, white fur | r-elbow         | 0           | Original Session 1 | runway |
| NOD, white fur | r-front-toe-tip | 0           | Original Session 1 | runway |
| NOD, white fur | r-head          | 0           | Original Session 1 | runway |
| NOD, white fur | r-hip           | 0           | Original Session 1 | runway |
| NOD, white fur | r-iliac-crest   | 0           | Original Session 1 | runway |
| NOD, white fur | r-shoulder      | 0           | Original Session 1 | runway |
| NOD, white fur | r-tail-base     | 0           | Original Session 1 | runway |
| NOD, white fur | r-wrist         | 0           | Original Session 1 | runway |
| NOD, white fur | d-back-left     | 99.25925926 | Modified Session 2 | runway |
| NOD, white fur | d-back-right    | 99.25925926 | Modified Session 2 | runway |
| NOD, white fur | d-front-left    | 99.23664122 | Modified Session 2 | runway |
| NOD, white fur | d-front-right   | 99.24242424 | Modified Session 2 | runway |
| NOD, white fur | d-head          | 100         | Modified Session 2 | runway |
| NOD, white fur | d-tail-base     | 98.48484848 | Modified Session 2 | runway |
| NOD, white fur | l-back-ankle    | 99.25925926 | Modified Session 2 | runway |
| NOD, white fur | l-back-toe      | 95.45454545 | Modified Session 2 | runway |
| NOD, white fur | l-elbow         | 95.45454545 | Modified Session 2 | runway |
| NOD, white fur | l-front-toe-tip | 96.92307692 | Modified Session 2 | runway |
| NOD, white fur | l-head          | 100         | Modified Session 2 | runway |
| NOD, white fur | l-hip           | 100         | Modified Session 2 | runway |
| NOD, white fur | l-iliac-crest   | 99.23664122 | Modified Session 2 | runway |
| NOD, white fur | l-shoulder      | 98.4962406  | Modified Session 2 | runway |
| NOD, white fur | l-tail-base     | 100         | Modified Session 2 | runway |
| NOD, white fur | l-wrist         | 96.96969697 | Modified Session 2 | runway |

|                |                 |             |                    |        |
|----------------|-----------------|-------------|--------------------|--------|
| NOD, white fur | r-back-ankle    | 96.2962963  | Modified Session 2 | runway |
| NOD, white fur | r-back-toe      | 96.26865672 | Modified Session 2 | runway |
| NOD, white fur | r-elbow         | 89.3129771  | Modified Session 2 | runway |
| NOD, white fur | r-front-toe-tip | 83.07692308 | Modified Session 2 | runway |
| NOD, white fur | r-head          | 100         | Modified Session 2 | runway |
| NOD, white fur | r-hip           | 100         | Modified Session 2 | runway |
| NOD, white fur | r-iliac-crest   | 98.46153846 | Modified Session 2 | runway |
| NOD, white fur | r-shoulder      | 99.23664122 | Modified Session 2 | runway |
| NOD, white fur | r-tail-base     | 100         | Modified Session 2 | runway |
| NOD, white fur | r-wrist         | 93.89312977 | Modified Session 2 | runway |

**Suppl. Table 3: Summary of accuracy during runway**

| <b>Group</b>      | <b>Likelihood</b> | <b>Training</b>    |
|-------------------|-------------------|--------------------|
| Bl6, original mic | 99.28344848       | Original Session 1 |
| Bl6, new mice     | 99.41159814       | Original Session 1 |
| NOD, white fur    | 2.341346098       | Original Session 1 |
| NOD, white fur    | 97.45471542       | Modified Session 2 |

**Suppl Table 4: Accuracy of labeling different mice during runway test**

| <b>Group</b>       | <b>Parameter</b> | <b>Likelihood</b> | <b>Training Session</b> | <b>Setup</b> |
|--------------------|------------------|-------------------|-------------------------|--------------|
| Bl6, original mice | d-back-left      | 96.969697         | Original Session 1      | ladder rung  |
| Bl6, original mice | d-back-right     | 98.2758621        | Original Session 1      | ladder rung  |
| Bl6, original mice | d-front-left     | 98.6998917        | Original Session 1      | ladder rung  |
| Bl6, original mice | d-front-right    | 95.9821429        | Original Session 1      | ladder rung  |
| Bl6, original mice | d-head           | 99.6760259        | Original Session 1      | ladder rung  |
| Bl6, original mice | d-tail-base      | 99.3576017        | Original Session 1      | ladder rung  |
| Bl6, original mice | l-back-ankle     | 94.5790081        | Original Session 1      | ladder rung  |
| Bl6, original mice | l-back-toe       | 91.1235955        | Original Session 1      | ladder rung  |
| Bl6, original mice | l-elbow          | 99.1351351        | Original Session 1      | ladder rung  |
| Bl6, original mice | l-front-toe-tip  | 81.6826411        | Original Session 1      | ladder rung  |
| Bl6, original mice | l-head           | 99.6499417        | Original Session 1      | ladder rung  |
| Bl6, original mice | l-hip            | 100               | Original Session 1      | ladder rung  |
| Bl6, original mice | l-iliac-crest    | 100               | Original Session 1      | ladder rung  |
| Bl6, original mice | l-shoulder       | 100               | Original Session 1      | ladder rung  |
| Bl6, original mice | l-tail-base      | 100               | Original Session 1      | ladder rung  |
| Bl6, original mice | l-wrist          | 89.5744681        | Original Session 1      | ladder rung  |
| Bl6, original mice | r-back-ankle     | 88.3886256        | Original Session 1      | ladder rung  |
| Bl6, original mice | r-back-toe       | 90.0816803        | Original Session 1      | ladder rung  |
| Bl6, original mice | r-elbow          | 95.3362256        | Original Session 1      | ladder rung  |
| Bl6, original mice | r-front-toe-tip  | 89.9022801        | Original Session 1      | ladder rung  |
| Bl6, original mice | r-head           | 100               | Original Session 1      | ladder rung  |
| Bl6, original mice | r-hip            | 100               | Original Session 1      | ladder rung  |
| Bl6, original mice | r-iliac-crest    | 100               | Original Session 1      | ladder rung  |
| Bl6, original mice | r-shoulder       | 97.4566474        | Original Session 1      | ladder rung  |
| Bl6, original mice | r-tail-base      | 100               | Original Session 1      | ladder rung  |
| Bl6, original mice | r-wrist          | 95.2329361        | Original Session 1      | ladder rung  |
| Bl6, original mice | d-back-left      | 100               | Original Session 1      | ladder rung  |
| Bl6, new mice      | d-back-right     | 95.6018519        | Original Session 1      | ladder rung  |
| Bl6, new mice      | d-front-left     | 97.752809         | Original Session 1      | ladder rung  |
| Bl6, new mice      | d-front-right    | 94.5454545        | Original Session 1      | ladder rung  |
| Bl6, new mice      | d-head           | 99.7722096        | Original Session 1      | ladder rung  |
| Bl6, new mice      | d-tail-base      | 98.3758701        | Original Session 1      | ladder rung  |
| Bl6, new mice      | l-back-ankle     | 87.5              | Original Session 1      | ladder rung  |
| Bl6, new mice      | l-back-toe       | 82.5287356        | Original Session 1      | ladder rung  |
| Bl6, new mice      | l-elbow          | 95.1388889        | Original Session 1      | ladder rung  |
| Bl6, new mice      | l-front-toe-tip  | 74.0909091        | Original Session 1      | ladder rung  |
| Bl6, new mice      | l-head           | 98.6238532        | Original Session 1      | ladder rung  |
| Bl6, new mice      | l-hip            | 100               | Original Session 1      | ladder rung  |
| Bl6, new mice      | l-iliac-crest    | 100               | Original Session 1      | ladder rung  |
| Bl6, new mice      | l-shoulder       | 98.5781991        | Original Session 1      | ladder rung  |
| Bl6, new mice      | l-tail-base      | 100               | Original Session 1      | ladder rung  |
| Bl6, new mice      | l-wrist          | 86.0411899        | Original Session 1      | ladder rung  |
| Bl6, new mice      | r-back-ankle     | 87.0748299        | Original Session 1      | ladder rung  |
| Bl6, new mice      | r-back-toe       | 85.778781         | Original Session 1      | ladder rung  |
| Bl6, new mice      | r-elbow          | 82.4884793        | Original Session 1      | ladder rung  |
| Bl6, new mice      | r-front-toe-tip  | 86.4367816        | Original Session 1      | ladder rung  |

|                |                 |            |                    |             |
|----------------|-----------------|------------|--------------------|-------------|
| Bl6, new mice  | r-head          | 99.3055556 | Original Session 1 | ladder rung |
| Bl6, new mice  | r-hip           | 99.3243243 | Original Session 1 | ladder rung |
| Bl6, new mice  | r-iliac-crest   | 99.7727273 | Original Session 1 | ladder rung |
| Bl6, new mice  | r-shoulder      | 76.443418  | Original Session 1 | ladder rung |
| Bl6, new mice  | r-tail-base     | 100        | Original Session 1 | ladder rung |
| Bl6, new mice  | r-wrist         | 92.9864253 | Original Session 1 | ladder rung |
| NOD, white fur | d-back-left     | 0          | Original Session 1 | ladder rung |
| NOD, white fur | d-back-right    | 0          | Original Session 1 | ladder rung |
| NOD, white fur | d-front-left    | 0          | Original Session 1 | ladder rung |
| NOD, white fur | d-front-right   | 0          | Original Session 1 | ladder rung |
| NOD, white fur | d-head          | 0          | Original Session 1 | ladder rung |
| NOD, white fur | d-tail-base     | 0          | Original Session 1 | ladder rung |
| NOD, white fur | l-back-ankle    | 0          | Original Session 1 | ladder rung |
| NOD, white fur | l-back-toe      | 0          | Original Session 1 | ladder rung |
| NOD, white fur | l-elbow         | 0          | Original Session 1 | ladder rung |
| NOD, white fur | l-front-toe-tip | 0          | Original Session 1 | ladder rung |
| NOD, white fur | l-head          | 0          | Original Session 1 | ladder rung |
| NOD, white fur | l-hip           | 0          | Original Session 1 | ladder rung |
| NOD, white fur | l-iliac-crest   | 0          | Original Session 1 | ladder rung |
| NOD, white fur | l-shoulder      | 0          | Original Session 1 | ladder rung |
| NOD, white fur | l-tail-base     | 0          | Original Session 1 | ladder rung |
| NOD, white fur | l-wrist         | 0          | Original Session 1 | ladder rung |
| NOD, white fur | r-back-ankle    | 0          | Original Session 1 | ladder rung |
| NOD, white fur | r-back-toe      | 0          | Original Session 1 | ladder rung |
| NOD, white fur | r-elbow         | 0          | Original Session 1 | ladder rung |
| NOD, white fur | r-front-toe-tip | 0          | Original Session 1 | ladder rung |
| NOD, white fur | r-head          | 0          | Original Session 1 | ladder rung |
| NOD, white fur | r-hip           | 0          | Original Session 1 | ladder rung |
| NOD, white fur | r-iliac-crest   | 0          | Original Session 1 | ladder rung |
| NOD, white fur | r-shoulder      | 0          | Original Session 1 | ladder rung |
| NOD, white fur | r-tail-base     | 0          | Original Session 1 | ladder rung |
| NOD, white fur | r-wrist         | 0          | Original Session 1 | ladder rung |
| NOD, white fur | d-back-left     | 95.959596  | Modified Session 2 | ladder rung |
| NOD, white fur | d-back-right    | 96.7576792 | Modified Session 2 | ladder rung |
| NOD, white fur | d-front-left    | 89.2307692 | Modified Session 2 | ladder rung |
| NOD, white fur | d-front-right   | 88.0749574 | Modified Session 2 | ladder rung |
| NOD, white fur | d-head          | 99.6705107 | Modified Session 2 | ladder rung |
| NOD, white fur | d-tail-base     | 82         | Modified Session 2 | ladder rung |
| NOD, white fur | l-back-ankle    | 94.5392491 | Modified Session 2 | ladder rung |
| NOD, white fur | l-back-toe      | 90.6354515 | Modified Session 2 | ladder rung |
| NOD, white fur | l-elbow         | 98.6394558 | Modified Session 2 | ladder rung |
| NOD, white fur | l-front-toe-tip | 80.952381  | Modified Session 2 | ladder rung |
| NOD, white fur | l-head          | 99.6557659 | Modified Session 2 | ladder rung |
| NOD, white fur | l-hip           | 100        | Modified Session 2 | ladder rung |
| NOD, white fur | l-iliac-crest   | 99.323181  | Modified Session 2 | ladder rung |
| NOD, white fur | l-shoulder      | 99.6539792 | Modified Session 2 | ladder rung |
| NOD, white fur | l-tail-base     | 99.6557659 | Modified Session 2 | ladder rung |
| NOD, white fur | l-wrist         | 86.0306644 | Modified Session 2 | ladder rung |

|                |                 |            |                    |             |
|----------------|-----------------|------------|--------------------|-------------|
| NOD, white fur | r-back-ankle    | 94.8892675 | Modified Session 2 | ladder rung |
| NOD, white fur | r-back-toe      | 93.2773109 | Modified Session 2 | ladder rung |
| NOD, white fur | r-elbow         | 93.814433  | Modified Session 2 | ladder rung |
| NOD, white fur | r-front-toe-tip | 75         | Modified Session 2 | ladder rung |
| NOD, white fur | r-head          | 99.6533795 | Modified Session 2 | ladder rung |
| NOD, white fur | r-hip           | 99.6655518 | Modified Session 2 | ladder rung |
| NOD, white fur | r-iliac-crest   | 98.3305509 | Modified Session 2 | ladder rung |
| NOD, white fur | r-shoulder      | 94.6826758 | Modified Session 2 | ladder rung |
| NOD, white fur | r-tail-base     | 98.9813243 | Modified Session 2 | ladder rung |
| NOD, white fur | r-wrist         | 80.4123711 | Modified Session 2 | ladder rung |

**Suppl. Table 5: Summary of accuracy during rung test**

| <b>Group</b>       | <b>Likelihood</b> | <b>Training</b>    |
|--------------------|-------------------|--------------------|
| Bl6, original mice | 96.3372002        | Original Session 1 |
| Bl6, new mice      | 93.0062036        | Original Session 1 |
| NOD, white fur     | 0                 | Original Session 1 |
| NOD, white fur     | 93.4417797        | Modified Session 2 |



**Suppl Table 6: Relative laser Doppler intensities 24h after stroke injury, baseline is 1**

| Mouse_ID | Side     | Relative LDI |
|----------|----------|--------------|
| ID_1     | L        | 0.96964282   |
| ID_2     | L        | 0.85884438   |
| ID_3     | L        | 0.94832747   |
| ID_4     | L        | 0.93208403   |
| ID_5     | L        | 1.07793734   |
| ID_6     | L        | 1.06103588   |
| ID_7     | L        | 0.91017473   |
| ID_1     | R        | 0.38120362   |
| ID_2     | R        | 0.17035167   |
| ID_3     | R        | 0.31565163   |
| ID_4     | R        | 0.25427492   |
| ID_5     | R        | 0.25176975   |
| ID_6     | R        | 0.54153461   |
| ID_7     | R        | 0.22838815   |
| ID_1     | baseline | 1.04581865   |
| ID_2     | baseline | 0.87407882   |
| ID_3     | baseline | 0.87236997   |
| ID_4     | baseline | 1.00907829   |
| ID_5     | baseline | 0.95524939   |
| ID_6     | baseline | 0.97361957   |
| ID_7     | baseline | 1.03513831   |
| ID_8     | baseline | 1.23464701   |

**Suppl. Table 7: Summary of LDI**

| Side     | LDI        | SD         |
|----------|------------|------------|
| L        | 0.96543524 | 0.0791983  |
| R        | 0.30616776 | 0.12333259 |
| baseline | 1          | 0.11546168 |

**Suppl Table 8: Statistical evaluation of data**

| Group1     | Group2    | padj       | Sig  | Stat test                 |
|------------|-----------|------------|------|---------------------------|
| Left side  | baseline  | 0.872246   | ns   | Tukey multiple comparison |
| right side | baseline  | 5.2007E-10 | **** | Tukey multiple comparison |
| right side | left side | 4.0138E-09 | **** | Tukey multiple comparison |

**Suppl Table 9: Stroke volume on left and right hemisphere at 21 dpi**

| Mouse_ID | Side | Stroke Volume in mm3 |
|----------|------|----------------------|
| ID_1     | L    | 0                    |
| ID_2     | L    | 0                    |
| ID_3     | L    | 0                    |
| ID_4     | L    | 0                    |
| ID_5     | L    | 0                    |
| ID_6     | L    | 0                    |
| ID_7     | L    | 0                    |
| ID_1     | R    | 1.299355407          |
| ID_2     | R    | 1.089375951          |
| ID_3     | R    | 1.329701471          |
| ID_4     | R    | 1.056641243          |
| ID_5     | R    | 1.382891652          |
| ID_6     | R    | 1.621320592          |
| ID_7     | R    | 1.34263095           |

**Suppl Table 10: Summary of stroke volume on left and right hemisphere at 21 dpi**

| Side | Stroke Volume in mm3 | SD          |
|------|----------------------|-------------|
| L    | 0                    | 0           |
| R    | 1.303131038          | 0.189883864 |

**Suppl Table 11: Stroke areas in cortical sections 21 dpi**

| Mouse_ID | Side | A-P axis relative to bregma in mm | Stroke area in mm2 |
|----------|------|-----------------------------------|--------------------|
| ID_1     | L    | -2.5                              | 0                  |
| ID_2     | L    | -2.5                              | 0                  |
| ID_3     | L    | -2.5                              | 0                  |
| ID_4     | L    | -2.5                              | 0                  |
| ID_5     | L    | -2.5                              | 0                  |
| ID_6     | L    | -2.5                              | 0                  |
| ID_7     | L    | -2.5                              | 0                  |
| ID_1     | R    | -2.5                              | 0                  |
| ID_2     | R    | -2.5                              | 0                  |
| ID_3     | R    | -2.5                              | 0                  |
| ID_4     | R    | -2.5                              | 0                  |
| ID_5     | R    | -2.5                              | 0                  |
| ID_6     | R    | -2.5                              | 0                  |
| ID_7     | R    | -2.5                              | 0                  |
| ID_1     | L    | -1.5                              | 0                  |
| ID_2     | L    | -1.5                              | 0                  |
| ID_3     | L    | -1.5                              | 0                  |
| ID_4     | L    | -1.5                              | 0                  |
| ID_5     | L    | -1.5                              | 0                  |
| ID_6     | L    | -1.5                              | 0                  |
| ID_7     | L    | -1.5                              | 0                  |
| ID_1     | R    | -1.5                              | 0                  |
| ID_2     | R    | -1.5                              | 0.62052749         |
| ID_3     | R    | -1.5                              | 0.395874101        |

|      |   |      |             |
|------|---|------|-------------|
| ID_4 | R | -1.5 | 0.269451822 |
| ID_5 | R | -1.5 | 0           |
| ID_6 | R | -1.5 | 0.807621874 |
| ID_7 | R | -1.5 | 0.546754634 |
| ID_1 | L | -0.5 | 0           |
| ID_2 | L | -0.5 | 0           |
| ID_3 | L | -0.5 | 0           |
| ID_4 | L | -0.5 | 0           |
| ID_5 | L | -0.5 | 0           |
| ID_6 | L | -0.5 | 0           |
| ID_7 | L | -0.5 | 0           |
| ID_1 | R | -0.5 | 0.237142277 |
| ID_2 | R | -0.5 | 0.722405361 |
| ID_3 | R | -0.5 | 0.4974167   |
| ID_4 | R | -0.5 | 0.590926211 |
| ID_5 | R | -0.5 | 0.548070937 |
| ID_6 | R | -0.5 | 0.757378657 |
| ID_7 | R | -0.5 | 0.736623045 |
| ID_1 | L | 0.5  | 0           |
| ID_2 | L | 0.5  | 0           |
| ID_3 | L | 0.5  | 0           |
| ID_4 | L | 0.5  | 0           |
| ID_5 | L | 0.5  | 0           |
| ID_6 | L | 0.5  | 0           |
| ID_7 | L | 0.5  | 0           |
| ID_1 | R | 0.5  | 0.913724914 |
| ID_2 | R | 0.5  | 0.473883078 |
| ID_3 | R | 0.5  | 0.768881997 |
| ID_4 | R | 0.5  | 0.72641693  |
| ID_5 | R | 0.5  | 0.838932186 |
| ID_6 | R | 0.5  | 0.578163799 |
| ID_7 | R | 0.5  | 0.434000051 |
| ID_1 | L | 1.5  | 0           |
| ID_2 | L | 1.5  | 0           |
| ID_3 | L | 1.5  | 0           |
| ID_4 | L | 1.5  | 0           |
| ID_5 | L | 1.5  | 0           |
| ID_6 | L | 1.5  | 0           |
| ID_7 | L | 1.5  | 0           |
| ID_1 | R | 1.5  | 0.434094674 |
| ID_2 | R | 1.5  | 0.257521549 |
| ID_3 | R | 1.5  | 0.286860314 |
| ID_4 | R | 1.5  | 0.047268964 |
| ID_5 | R | 1.5  | 0.607549084 |
| ID_6 | R | 1.5  | 0.288816558 |
| ID_7 | R | 1.5  | 0.296568696 |
| ID_1 | L | 2.5  | 0           |
| ID_2 | L | 2.5  | 0           |

|      |   |     |   |
|------|---|-----|---|
| ID_3 | L | 2.5 | 0 |
| ID_4 | L | 2.5 | 0 |
| ID_5 | L | 2.5 | 0 |
| ID_6 | L | 2.5 | 0 |
| ID_7 | L | 2.5 | 0 |
| ID_1 | R | 2.5 | 0 |
| ID_2 | R | 2.5 | 0 |
| ID_3 | R | 2.5 | 0 |
| ID_4 | R | 2.5 | 0 |
| ID_5 | R | 2.5 | 0 |
| ID_6 | R | 2.5 | 0 |
| ID_7 | R | 2.5 | 0 |

**Suppl Table 12: Summary of stroke areas in cortical sections 21 dpi**

| Side | A-P axis relative to bregma | Stroke area in mm2 | SD          |
|------|-----------------------------|--------------------|-------------|
| L    | -2.5                        | 0                  | 0           |
| R    | -2.5                        | 0                  | 0           |
| L    | -1.5                        | 0                  | 0           |
| R    | -1.5                        | 0.377175703        | 0.308149882 |
| L    | -0.5                        | 0                  | 0           |
| R    | -0.5                        | 0.584280455        | 0.18332815  |
| L    | 0.5                         | 0                  | 0           |
| R    | 0.5                         | 0.676286136        | 0.18403602  |
| L    | 1.5                         | 0                  | 0           |
| R    | 1.5                         | 0.316954263        | 0.171533564 |
| L    | 2.5                         | 0                  | 0           |
| R    | 2.5                         | 0                  | 0           |

**Suppl. Table 13: Raw data bottom analysis**

| <b>day</b> | <b>ID</b> | <b>Parameter</b>    | <b>Value</b> |
|------------|-----------|---------------------|--------------|
| baseline   | ID 1      | average duration    | 0.25833333   |
| baseline   | ID 2      | average duration    | 0.54166667   |
| baseline   | ID 3      | average duration    | 0.36666667   |
| baseline   | ID 4      | average duration    | 0.425        |
| baseline   | ID 5      | average duration    | 0.59166667   |
| baseline   | ID 6      | average duration    | 0.61666667   |
| baseline   | ID 7      | average duration    | 0.25         |
| baseline   | ID 8      | average duration    | 0.40833333   |
| baseline   | ID 9      | average duration    | 0.33333333   |
| baseline   | ID 10     | average duration    | 0.23333333   |
| baseline   | ID 11     | average duration    | 0.75         |
| baseline   | ID 12     | average duration    | 0.38333333   |
| baseline   | ID 13     | average duration    | 0.23333333   |
| 3days      | ID 1      | average duration    | 0.61666667   |
| 3days      | ID 2      | average duration    | 0.33333333   |
| 3days      | ID 3      | average duration    | 0.3          |
| 3days      | ID 4      | average duration    | 0.6          |
| 3days      | ID 5      | average duration    | 0.71666667   |
| 3days      | ID 6      | average duration    | 0.65         |
| 3days      | ID 7      | average duration    | 0.99166667   |
| 3days      | ID 8      | average duration    | 0.66666667   |
| 7days      | ID 1      | average duration    | 0.38333333   |
| 7days      | ID 2      | average duration    | 0.53333333   |
| 7days      | ID 3      | average duration    | 0.36666667   |
| 7days      | ID 4      | average duration    | 0.23333333   |
| 7days      | ID 5      | average duration    | 0.25         |
| 7days      | ID 6      | average duration    | 0.40833333   |
| 7days      | ID 7      | average duration    | 0.65833333   |
| 7days      | ID 8      | average duration    | 0.45         |
| 7days      | ID 9      | average duration    | 0.95         |
| 14days     | ID 1      | average duration    | 0.35         |
| 14days     | ID 2      | average duration    | 0.3          |
| 14days     | ID 3      | average duration    | 0.38333333   |
| 14days     | ID 4      | average duration    | 0.48333333   |
| 14days     | ID 5      | average duration    | 0.31666667   |
| 14days     | ID 6      | average duration    | 0.56666667   |
| 14days     | ID 7      | average duration    | 0.4          |
| 14days     | ID 8      | average duration    | 0.50833333   |
| 14days     | ID 9      | average duration    | 0.56666667   |
| 14days     | ID 10     | average duration    | 0.8          |
| 14days     | ID 11     | average duration    | 0.33333333   |
| 21days     | ID 1      | average duration    | 0.48333333   |
| 21days     | ID 2      | average duration    | 0.425        |
| 21days     | ID 3      | average duration    | 0.40833333   |
| 21days     | ID 4      | average duration    | 0.16666667   |
| 21days     | ID 5      | average duration    | 0.36666667   |
| 21days     | ID 6      | average duration    | 0.31666667   |
| 21days     | ID 7      | average duration    | 0.24166667   |
| 21days     | ID 8      | average duration    | 0.525        |
| 21days     | ID 9      | average duration    | 0.31666667   |
| 21days     | ID 10     | average duration    | 0.275        |
| baseline   | ID 1      | average stance time | 0.13333333   |
| baseline   | ID 2      | average stance time | 0.15         |
| baseline   | ID 3      | average stance time | 0.13333333   |

|          |       |                     |            |
|----------|-------|---------------------|------------|
| baseline | ID_4  | average stance time | 0.13333333 |
| baseline | ID_5  | average stance time | 0.26666667 |
| baseline | ID_6  | average stance time | 0.13333333 |
| baseline | ID_7  | average stance time | 0.11666667 |
| baseline | ID_8  | average stance time | 0.1        |
| baseline | ID_9  | average stance time | 0.13333333 |
| baseline | ID_10 | average stance time | 0.1        |
| baseline | ID_11 | average stance time | 0.21666667 |
| baseline | ID_12 | average stance time | 0.11666667 |
| baseline | ID_13 | average stance time | 0.1        |
| 3days    | ID_1  | average stance time | 0.28333333 |
| 3days    | ID_2  | average stance time | 0.16666667 |
| 3days    | ID_3  | average stance time | 0.15       |
| 3days    | ID_4  | average stance time | 0.28333333 |
| 3days    | ID_5  | average stance time | 0.26666667 |
| 3days    | ID_6  | average stance time | 0.18333333 |
| 3days    | ID_7  | average stance time | 0.2        |
| 3days    | ID_8  | average stance time | 0.16666667 |
| 7days    | ID_1  | average stance time | 0.15       |
| 7days    | ID_2  | average stance time | 0.14166667 |
| 7days    | ID_3  | average stance time | 0.15       |
| 7days    | ID_4  | average stance time | 0.11666667 |
| 7days    | ID_5  | average stance time | 0.1        |
| 7days    | ID_6  | average stance time | 0.2        |
| 7days    | ID_7  | average stance time | 0.28333333 |
| 7days    | ID_8  | average stance time | 0.16666667 |
| 7days    | ID_9  | average stance time | 0.19166667 |
| 14days   | ID_1  | average stance time | 0.1        |
| 14days   | ID_2  | average stance time | 0.13333333 |
| 14days   | ID_3  | average stance time | 0.13333333 |
| 14days   | ID_4  | average stance time | 0.16666667 |
| 14days   | ID_5  | average stance time | 0.13333333 |
| 14days   | ID_6  | average stance time | 0.3        |
| 14days   | ID_7  | average stance time | 0.19166667 |
| 14days   | ID_8  | average stance time | 0.18333333 |
| 14days   | ID_9  | average stance time | 0.16666667 |
| 14days   | ID_10 | average stance time | 0.16666667 |
| 14days   | ID_11 | average stance time | 0.15       |
| 21days   | ID_1  | average stance time | 0.18333333 |
| 21days   | ID_2  | average stance time | 0.15       |
| 21days   | ID_3  | average stance time | 0.2        |
| 21days   | ID_4  | average stance time | 0.06666667 |
| 21days   | ID_5  | average stance time | 0.18333333 |
| 21days   | ID_6  | average stance time | 0.15833333 |
| 21days   | ID_7  | average stance time | 0.11666667 |
| 21days   | ID_8  | average stance time | 0.1        |
| 21days   | ID_9  | average stance time | 0.15       |
| 21days   | ID_10 | average stance time | 0.13333333 |
| baseline | ID_1  | average swing time  | 0.125      |
| baseline | ID_2  | average swing time  | 0.13333333 |
| baseline | ID_3  | average swing time  | 0.13333333 |
| baseline | ID_4  | average swing time  | 0.10833333 |
| baseline | ID_5  | average swing time  | 0.15       |
| baseline | ID_6  | average swing time  | 0.15       |
| baseline | ID_7  | average swing time  | 0.13333333 |
| baseline | ID_8  | average swing time  | 0.1        |

|          |       |                                       |            |
|----------|-------|---------------------------------------|------------|
| baseline | ID_9  | average swing time                    | 0.13333333 |
| baseline | ID_10 | average swing time                    | 0.13333333 |
| baseline | ID_11 | average swing time                    | 0.13333333 |
| baseline | ID_12 | average swing time                    | 0.13333333 |
| baseline | ID_13 | average swing time                    | 0.13333333 |
| 3days    | ID_1  | average swing time                    | 0.13333333 |
| 3days    | ID_2  | average swing time                    | 0.13333333 |
| 3days    | ID_3  | average swing time                    | 0.13333333 |
| 3days    | ID_4  | average swing time                    | 0.11666667 |
| 3days    | ID_5  | average swing time                    | 0.13333333 |
| 3days    | ID_6  | average swing time                    | 0.13333333 |
| 3days    | ID_7  | average swing time                    | 0.15       |
| 3days    | ID_8  | average swing time                    | 0.11666667 |
| 7days    | ID_1  | average swing time                    | 0.11666667 |
| 7days    | ID_2  | average swing time                    | 0.11666667 |
| 7days    | ID_3  | average swing time                    | 0.11666667 |
| 7days    | ID_4  | average swing time                    | 0.13333333 |
| 7days    | ID_5  | average swing time                    | 0.11666667 |
| 7days    | ID_6  | average swing time                    | 0.15833333 |
| 7days    | ID_7  | average swing time                    | 0.15       |
| 7days    | ID_8  | average swing time                    | 0.16666667 |
| 7days    | ID_9  | average swing time                    | 0.13333333 |
| 14days   | ID_1  | average swing time                    | 0.11666667 |
| 14days   | ID_2  | average swing time                    | 0.13333333 |
| 14days   | ID_3  | average swing time                    | 0.11666667 |
| 14days   | ID_4  | average swing time                    | 0.13333333 |
| 14days   | ID_5  | average swing time                    | 0.13333333 |
| 14days   | ID_6  | average swing time                    | 0.13333333 |
| 14days   | ID_7  | average swing time                    | 0.16666667 |
| 14days   | ID_8  | average swing time                    | 0.16666667 |
| 14days   | ID_9  | average swing time                    | 0.11666667 |
| 14days   | ID_10 | average swing time                    | 0.15       |
| 14days   | ID_11 | average swing time                    | 0.15       |
| 21days   | ID_1  | average swing time                    | 0.11666667 |
| 21days   | ID_2  | average swing time                    | 0.16666667 |
| 21days   | ID_3  | average swing time                    | 0.15       |
| 21days   | ID_4  | average swing time                    | 0.13333333 |
| 21days   | ID_5  | average swing time                    | 0.15       |
| 21days   | ID_6  | average swing time                    | 0.14166667 |
| 21days   | ID_7  | average swing time                    | 0.15       |
| 21days   | ID_8  | average swing time                    | 0.14166667 |
| 21days   | ID_9  | average swing time                    | 0.15       |
| 21days   | ID_10 | average swing time                    | 0.13333333 |
| baseline | ID_1  | left front right back synchronization | 0.10416667 |
| baseline | ID_2  | left front right back synchronization | 0.17931034 |
| baseline | ID_3  | left front right back synchronization | 0.15789474 |
| baseline | ID_4  | left front right back synchronization | 0.28030303 |
| baseline | ID_5  | left front right back synchronization | 0.28497409 |
| baseline | ID_6  | left front right back synchronization | 0.10434783 |
| baseline | ID_7  | left front right back synchronization | 0.12844037 |
| baseline | ID_8  | left front right back synchronization | 0.22834646 |
| baseline | ID_9  | left front right back synchronization | 0.17213115 |
| baseline | ID_10 | left front right back synchronization | 0.0990099  |
| baseline | ID_11 | left front right back synchronization | 0.37820513 |
| baseline | ID_12 | left front right back synchronization | 0.13114754 |
| baseline | ID_13 | left front right back synchronization | 0.13684211 |

|          |       |                                       |            |
|----------|-------|---------------------------------------|------------|
| 3days    | ID_1  | left front right back synchronization | 0.33163265 |
| 3days    | ID_2  | left front right back synchronization | 0.21126761 |
| 3days    | ID_3  | left front right back synchronization | 0.18656716 |
| 3days    | ID_4  | left front right back synchronization | 0.4        |
| 3days    | ID_5  | left front right back synchronization | 0.36065574 |
| 3days    | ID_6  | left front right back synchronization | 0.16564417 |
| 3days    | ID_7  | left front right back synchronization | 0.30120482 |
| 3days    | ID_8  | left front right back synchronization | 0.26       |
| 7days    | ID_1  | left front right back synchronization | 0.1884058  |
| 7days    | ID_2  | left front right back synchronization | 0.1986755  |
| 7days    | ID_3  | left front right back synchronization | 0.28985507 |
| 7days    | ID_4  | left front right back synchronization | 0.20535714 |
| 7days    | ID_5  | left front right back synchronization | 0.14159292 |
| 7days    | ID_6  | left front right back synchronization | 0.17037037 |
| 7days    | ID_7  | left front right back synchronization | 0.34027778 |
| 7days    | ID_8  | left front right back synchronization | 0.15503876 |
| 7days    | ID_9  | left front right back synchronization | 0.27333333 |
| 14days   | ID_1  | left front right back synchronization | 0.24576271 |
| 14days   | ID_2  | left front right back synchronization | 0.15       |
| 14days   | ID_3  | left front right back synchronization | 0.15909091 |
| 14days   | ID_4  | left front right back synchronization | 0.19708029 |
| 14days   | ID_5  | left front right back synchronization | 0.15315315 |
| 14days   | ID_6  | left front right back synchronization | 0.27338129 |
| 14days   | ID_7  | left front right back synchronization | 0.15       |
| 14days   | ID_8  | left front right back synchronization | 0.16666667 |
| 14days   | ID_9  | left front right back synchronization | 0.26206897 |
| 14days   | ID_10 | left front right back synchronization | 0.18       |
| 14days   | ID_11 | left front right back synchronization | 0.15       |
| 21days   | ID_1  | left front right back synchronization | 0.26751592 |
| 21days   | ID_2  | left front right back synchronization | 0.14655172 |
| 21days   | ID_3  | left front right back synchronization | 0.21481481 |
| 21days   | ID_4  | left front right back synchronization | 0.09589041 |
| 21days   | ID_5  | left front right back synchronization | 0.17391304 |
| 21days   | ID_6  | left front right back synchronization | 0.15151515 |
| 21days   | ID_7  | left front right back synchronization | 0.09345794 |
| 21days   | ID_8  | left front right back synchronization | 0.16666667 |
| 21days   | ID_9  | left front right back synchronization | 0.1171875  |
| 21days   | ID_10 | left front right back synchronization | 0.15044248 |
| baseline | ID_1  | right front left back synchronization | 0.0625     |
| baseline | ID_2  | right front left back synchronization | 0.14482759 |
| baseline | ID_3  | right front left back synchronization | 0.09022556 |
| baseline | ID_4  | right front left back synchronization | 0.28030303 |
| baseline | ID_5  | right front left back synchronization | 0.37823834 |
| baseline | ID_6  | right front left back synchronization | 0.16521739 |
| baseline | ID_7  | right front left back synchronization | 0.18348624 |
| baseline | ID_8  | right front left back synchronization | 0.2519685  |
| baseline | ID_9  | right front left back synchronization | 0.16393443 |
| baseline | ID_10 | right front left back synchronization | 0.07920792 |
| baseline | ID_11 | right front left back synchronization | 0.17307692 |
| baseline | ID_12 | right front left back synchronization | 0.14754098 |
| baseline | ID_13 | right front left back synchronization | 0.09473684 |
| 3days    | ID_1  | right front left back synchronization | 0.48979592 |
| 3days    | ID_2  | right front left back synchronization | 0.26760563 |
| 3days    | ID_3  | right front left back synchronization | 0.17910448 |
| 3days    | ID_4  | right front left back synchronization | 0.48717949 |
| 3days    | ID_5  | right front left back synchronization | 0.40983607 |



|        |       |                                       |            |
|--------|-------|---------------------------------------|------------|
| 3days  | ID_6  | right front left back synchronization | 0.32515337 |
| 3days  | ID_7  | right front left back synchronization | 0.21084337 |
| 3days  | ID_8  | right front left back synchronization | 0.23333333 |
| 7days  | ID_1  | right front left back synchronization | 0.31884058 |
| 7days  | ID_2  | right front left back synchronization | 0.18543046 |
| 7days  | ID_3  | right front left back synchronization | 0.28985507 |
| 7days  | ID_4  | right front left back synchronization | 0.16071429 |
| 7days  | ID_5  | right front left back synchronization | 0.20353982 |
| 7days  | ID_6  | right front left back synchronization | 0.2        |
| 7days  | ID_7  | right front left back synchronization | 0.43055556 |
| 7days  | ID_8  | right front left back synchronization | 0.10852713 |
| 7days  | ID_9  | right front left back synchronization | 0.30666667 |
| 14days | ID_1  | right front left back synchronization | 0.23728814 |
| 14days | ID_2  | right front left back synchronization | 0.1625     |
| 14days | ID_3  | right front left back synchronization | 0.16666667 |
| 14days | ID_4  | right front left back synchronization | 0.24087591 |
| 14days | ID_5  | right front left back synchronization | 0.17117117 |
| 14days | ID_6  | right front left back synchronization | 0.41726619 |
| 14days | ID_7  | right front left back synchronization | 0.2        |
| 14days | ID_8  | right front left back synchronization | 0.20138889 |
| 14days | ID_9  | right front left back synchronization | 0.27586207 |
| 14days | ID_10 | right front left back synchronization | 0.26666667 |
| 14days | ID_11 | right front left back synchronization | 0.15       |
| 21days | ID_1  | right front left back synchronization | 0.29936306 |
| 21days | ID_2  | right front left back synchronization | 0.11206897 |
| 21days | ID_3  | right front left back synchronization | 0.27407407 |
| 21days | ID_4  | right front left back synchronization | 0.10958904 |
| 21days | ID_5  | right front left back synchronization | 0.23188406 |
| 21days | ID_6  | right front left back synchronization | 0.13636364 |
| 21days | ID_7  | right front left back synchronization | 0.09345794 |
| 21days | ID_8  | right front left back synchronization | 0.06862745 |
| 21days | ID_9  | right front left back synchronization | 0.1953125  |
| 21days | ID_10 | right front left back synchronization | 0.22123894 |

**Suppl. Table 14: Summary of bottom analysis**

| <b>day</b> | <b>Parameter</b> | <b>Mean</b> | <b>SD</b>  |
|------------|------------------|-------------|------------|
| baseline   | average dur      | 0.41474359  | 0.16534734 |
| 3days      | average dur      | 0.609375    | 0.21864652 |
| 7days      | average dur      | 0.47037037  | 0.22267749 |
| 14days     | average dur      | 0.45530303  | 0.14992001 |
| 21days     | average dur      | 0.3525      | 0.11097561 |
| baseline   | average star     | 0.141025641 | 0.04840769 |
| 3days      | average star     | 0.2125      | 0.05616727 |
| 7days      | average star     | 0.166666667 | 0.05416667 |
| 14days     | average star     | 0.165909091 | 0.05170087 |
| 21days     | average star     | 0.144166667 | 0.04121047 |
| baseline   | average swi      | 0.130769231 | 0.01377087 |
| 3days      | average swi      | 0.13125     | 0.01068117 |
| 7days      | average swi      | 0.134259259 | 0.01973982 |
| 14days     | average swi      | 0.137878788 | 0.01839521 |
| 21days     | average swi      | 0.143333333 | 0.0134944  |
| baseline   | left front rig   | 0.183470719 | 0.0856535  |
| 3days      | left front rig   | 0.277121519 | 0.08526072 |
| 7days      | left front rig   | 0.218100741 | 0.06769096 |
| 14days     | left front rig   | 0.189745818 | 0.04802373 |
| 21days     | left front rig   | 0.157795566 | 0.05319644 |
| baseline   | right front l    | 0.170404904 | 0.08919253 |
| 3days      | right front l    | 0.325356458 | 0.12344471 |
| 7days      | right front l    | 0.244903286 | 0.09919638 |
| 14days     | right front l    | 0.226335063 | 0.07660734 |
| 21days     | right front l    | 0.174197967 | 0.08079999 |

**Suppl. Table 15: Statistical test of bottom analysis**

| Measure                   | group1   | group2 | p.adj      | sig  | Test                     |
|---------------------------|----------|--------|------------|------|--------------------------|
| average dur <sub>2</sub>  | baseline | 3days  | 0.04648307 | *    | Repeated ANOVA, PH test* |
| average dur <sub>2</sub>  | baseline | 7days  |            | 1 ns | Repeated ANOVA, PH test* |
| average dur <sub>2</sub>  | baseline | 14days |            | 1 ns | Repeated ANOVA, PH test* |
| average dur <sub>2</sub>  | baseline | 21days |            | 1 ns | Repeated ANOVA, PH test* |
| average stan <sub>0</sub> | baseline | 3days  | 0.03937093 | *    | Repeated ANOVA, PH test* |
| average stan <sub>0</sub> | baseline | 7days  | 0.77236619 | ns   | Repeated ANOVA, PH test* |
| average stan <sub>0</sub> | baseline | 14days | 0.77236619 | ns   | Repeated ANOVA, PH test* |
| average stan <sub>0</sub> | baseline | 21days | 0.89167767 | ns   | Repeated ANOVA, PH test* |
| duration_sd               | baseline | 3days  | 0.94665102 | ns   | Repeated ANOVA, PH test* |
| duration_sd               | baseline | 7days  |            | 1 ns | Repeated ANOVA, PH test* |
| duration_sd               | baseline | 14days |            | 1 ns | Repeated ANOVA, PH test* |
| duration_sd               | baseline | 21days |            | 1 ns | Repeated ANOVA, PH test* |
| LFRB synch <sub>0</sub>   | baseline | 3days  | 0.02116338 | *    | Repeated ANOVA, PH test* |
| LFRB synch <sub>0</sub>   | baseline | 7days  | 0.47641714 | ns   | Repeated ANOVA, PH test* |
| LFRB synch <sub>0</sub>   | baseline | 14days | 0.93621763 | ns   | Repeated ANOVA, PH test* |
| LFRB synch <sub>0</sub>   | baseline | 21days | 0.93621763 | ns   | Repeated ANOVA, PH test* |
| RFBL synch <sub>0</sub>   | baseline | 3days  | 8.8073E-05 | **** | Repeated ANOVA, PH test* |
| RFBL synch <sub>0</sub>   | baseline | 7days  | 0.0288736  | *    | Repeated ANOVA, PH test* |
| RFBL synch <sub>0</sub>   | baseline | 14days | 0.03061719 | *    | Repeated ANOVA, PH test* |
| RFBL synch <sub>0</sub>   | baseline | 21days | 0.80513565 | ns   | Repeated ANOVA, PH test* |

\* p.adjust.method = "holm", ref group = baseline (for more details see Methods)

**Suppl. Table 16: Raw data bottom angle analysis**

| day    | Measure      | Angle, °   | ID    |
|--------|--------------|------------|-------|
| 0days  | LB_avg_Angle | 50.4077012 | ID_1  |
| 0days  | LB_avg_Angle | 46.2632675 | ID_2  |
| 0days  | LB_avg_Angle | 51.8477229 | ID_3  |
| 0days  | LB_avg_Angle | 43.6508697 | ID_4  |
| 0days  | LB_avg_Angle | 54.2814501 | ID_5  |
| 0days  | LB_avg_Angle | 47.6089647 | ID_6  |
| 0days  | LB_avg_Angle | 47.3941644 | ID_7  |
| 0days  | LB_avg_Angle | 42.1677037 | ID_8  |
| 0days  | LB_avg_Angle | 48.8915014 | ID_9  |
| 0days  | LB_avg_Angle | 49.6482824 | ID_10 |
| 0days  | LB_avg_Angle | 48.4205062 | ID_11 |
| 0days  | LB_avg_Angle | 44.9161935 | ID_12 |
| 0days  | LB_avg_Angle | 45.3047359 | ID_13 |
| 3days  | LB_avg_Angle | 56.7093179 | ID_1  |
| 3days  | LB_avg_Angle | 49.7875511 | ID_2  |
| 3days  | LB_avg_Angle | 49.6046545 | ID_3  |
| 3days  | LB_avg_Angle | 48.5468763 | ID_4  |
| 3days  | LB_avg_Angle | 45.5417375 | ID_5  |
| 3days  | LB_avg_Angle | 46.4329682 | ID_6  |
| 3days  | LB_avg_Angle | 56.8399674 | ID_7  |
| 3days  | LB_avg_Angle | 47.7674786 | ID_8  |
| 7days  | LB_avg_Angle | 47.4811774 | ID_1  |
| 7days  | LB_avg_Angle | 45.6543481 | ID_2  |
| 7days  | LB_avg_Angle | 52.4828104 | ID_3  |
| 7days  | LB_avg_Angle | 48.945709  | ID_4  |
| 7days  | LB_avg_Angle | 50.8862455 | ID_5  |
| 7days  | LB_avg_Angle | 51.4478357 | ID_6  |
| 7days  | LB_avg_Angle | 48.9761677 | ID_7  |
| 7days  | LB_avg_Angle | 50.5034691 | ID_8  |
| 7days  | LB_avg_Angle | 55.529131  | ID_9  |
| 14days | LB_avg_Angle | 50.3122777 | ID_1  |
| 14days | LB_avg_Angle | 51.9261004 | ID_2  |
| 14days | LB_avg_Angle | 47.8045234 | ID_3  |
| 14days | LB_avg_Angle | 49.6406405 | ID_4  |
| 14days | LB_avg_Angle | 52.3945749 | ID_5  |
| 14days | LB_avg_Angle | 55.6305889 | ID_6  |
| 14days | LB_avg_Angle | 48.4529191 | ID_7  |
| 14days | LB_avg_Angle | 48.9886127 | ID_8  |
| 14days | LB_avg_Angle | 48.0132903 | ID_9  |
| 14days | LB_avg_Angle | 52.781057  | ID_10 |
| 14days | LB_avg_Angle | 55.0773354 | ID_11 |
| 21days | LB_avg_Angle | 47.672133  | ID_1  |
| 21days | LB_avg_Angle | 54.1935514 | ID_2  |
| 21days | LB_avg_Angle | 55.6359358 | ID_3  |
| 21days | LB_avg_Angle | 53.8303683 | ID_4  |
| 21days | LB_avg_Angle | 51.5771797 | ID_5  |
| 21days | LB_avg_Angle | 47.7049767 | ID_6  |
| 21days | LB_avg_Angle | 49.3323145 | ID_7  |
| 21days | LB_avg_Angle | 42.3500748 | ID_8  |
| 21days | LB_avg_Angle | 48.4011887 | ID_9  |
| 21days | LB_avg_Angle | 46.693582  | ID_10 |
| 0days  | LB_max       | 75.6027361 | ID_1  |
| 0days  | LB_max       | 81.4634481 | ID_2  |
| 0days  | LB_max       | 74.069999  | ID_3  |

|        |        |            |       |
|--------|--------|------------|-------|
| 0days  | LB_max | 70.774883  | ID_4  |
| 0days  | LB_max | 72.4356346 | ID_5  |
| 0days  | LB_max | 69.9449045 | ID_6  |
| 0days  | LB_max | 78.6149721 | ID_7  |
| 0days  | LB_max | 78.9854971 | ID_8  |
| 0days  | LB_max | 73.0850971 | ID_9  |
| 0days  | LB_max | 75.4969288 | ID_10 |
| 0days  | LB_max | 67.6386185 | ID_11 |
| 0days  | LB_max | 76.7281341 | ID_12 |
| 0days  | LB_max | 75.4352644 | ID_13 |
| 3days  | LB_max | 71.3561627 | ID_1  |
| 3days  | LB_max | 73.4782816 | ID_2  |
| 3days  | LB_max | 73.5486086 | ID_3  |
| 3days  | LB_max | 70.8213052 | ID_4  |
| 3days  | LB_max | 79.0749323 | ID_5  |
| 3days  | LB_max | 76.2572046 | ID_6  |
| 3days  | LB_max | 82.0311242 | ID_7  |
| 3days  | LB_max | 77.1708438 | ID_8  |
| 7days  | LB_max | 72.7784758 | ID_1  |
| 7days  | LB_max | 76.8154719 | ID_2  |
| 7days  | LB_max | 71.4535317 | ID_3  |
| 7days  | LB_max | 73.435902  | ID_4  |
| 7days  | LB_max | 79.4444907 | ID_5  |
| 7days  | LB_max | 72.6221119 | ID_6  |
| 7days  | LB_max | 69.5756072 | ID_7  |
| 7days  | LB_max | 71.4153506 | ID_8  |
| 7days  | LB_max | 77.3774398 | ID_9  |
| 14days | LB_max | 74.9646969 | ID_1  |
| 14days | LB_max | 71.473176  | ID_2  |
| 14days | LB_max | 74.1434788 | ID_3  |
| 14days | LB_max | 70.0281556 | ID_4  |
| 14days | LB_max | 75.6343805 | ID_5  |
| 14days | LB_max | 69.3589935 | ID_6  |
| 14days | LB_max | 79.7671195 | ID_7  |
| 14days | LB_max | 80.5561463 | ID_8  |
| 14days | LB_max | 73.4745868 | ID_9  |
| 14days | LB_max | 74.9809401 | ID_10 |
| 14days | LB_max | 75.3733273 | ID_11 |
| 21days | LB_max | 77.1749442 | ID_1  |
| 21days | LB_max | 68.5800134 | ID_2  |
| 21days | LB_max | 72.8488419 | ID_3  |
| 21days | LB_max | 77.1250917 | ID_4  |
| 21days | LB_max | 77.724208  | ID_5  |
| 21days | LB_max | 78.6170218 | ID_6  |
| 21days | LB_max | 76.8056567 | ID_7  |
| 21days | LB_max | 75.4825825 | ID_8  |
| 21days | LB_max | 78.1885294 | ID_9  |
| 21days | LB_max | 73.484921  | ID_10 |
| 0days  | LB_min | 18.779951  | ID_1  |
| 0days  | LB_min | 12.1393046 | ID_2  |
| 0days  | LB_min | 14.5346713 | ID_3  |
| 0days  | LB_min | 9.86731573 | ID_4  |
| 0days  | LB_min | 21.2852704 | ID_5  |
| 0days  | LB_min | 17.7882452 | ID_6  |
| 0days  | LB_min | 13.2839772 | ID_7  |
| 0days  | LB_min | 11.1572571 | ID_8  |

|        |              |            |       |
|--------|--------------|------------|-------|
| 0days  | LB_min       | 20.7572374 | ID_9  |
| 0days  | LB_min       | 11.512426  | ID_10 |
| 0days  | LB_min       | 16.4456199 | ID_11 |
| 0days  | LB_min       | 13.8128615 | ID_12 |
| 0days  | LB_min       | 18.9384396 | ID_13 |
| 3days  | LB_min       | 26.6972495 | ID_1  |
| 3days  | LB_min       | 21.1645706 | ID_2  |
| 3days  | LB_min       | 21.601163  | ID_3  |
| 3days  | LB_min       | 13.0184654 | ID_4  |
| 3days  | LB_min       | 11.2072338 | ID_5  |
| 3days  | LB_min       | 13.7395223 | ID_6  |
| 3days  | LB_min       | 19.7260928 | ID_7  |
| 3days  | LB_min       | 17.8103329 | ID_8  |
| 7days  | LB_min       | 15.6142006 | ID_1  |
| 7days  | LB_min       | 9.04592594 | ID_2  |
| 7days  | LB_min       | 13.3531695 | ID_3  |
| 7days  | LB_min       | 11.5769437 | ID_4  |
| 7days  | LB_min       | 16.9383934 | ID_5  |
| 7days  | LB_min       | 20.0917916 | ID_6  |
| 7days  | LB_min       | 13.6707086 | ID_7  |
| 7days  | LB_min       | 9.80482036 | ID_8  |
| 7days  | LB_min       | 24.0422522 | ID_9  |
| 14days | LB_min       | 18.2062696 | ID_1  |
| 14days | LB_min       | 20.739789  | ID_2  |
| 14days | LB_min       | 12.5164845 | ID_3  |
| 14days | LB_min       | 13.4960615 | ID_4  |
| 14days | LB_min       | 16.2081826 | ID_5  |
| 14days | LB_min       | 18.3561095 | ID_6  |
| 14days | LB_min       | 13.0310458 | ID_7  |
| 14days | LB_min       | 11.6624493 | ID_8  |
| 14days | LB_min       | 18.5569438 | ID_9  |
| 14days | LB_min       | 15.700712  | ID_10 |
| 14days | LB_min       | 19.3793992 | ID_11 |
| 21days | LB_min       | 12.8352746 | ID_1  |
| 21days | LB_min       | 19.2433292 | ID_2  |
| 21days | LB_min       | 17.5211671 | ID_3  |
| 21days | LB_min       | 24.6634923 | ID_4  |
| 21days | LB_min       | 13.3747976 | ID_5  |
| 21days | LB_min       | 9.86454066 | ID_6  |
| 21days | LB_min       | 18.4372497 | ID_7  |
| 21days | LB_min       | 11.4983433 | ID_8  |
| 21days | LB_min       | 12.5371903 | ID_9  |
| 21days | LB_min       | 15.2239172 | ID_10 |
| 0days  | LF_avg_Angle | 44.3766867 | ID_1  |
| 0days  | LF_avg_Angle | 45.6786656 | ID_2  |
| 0days  | LF_avg_Angle | 45.6025225 | ID_3  |
| 0days  | LF_avg_Angle | 40.0442004 | ID_4  |
| 0days  | LF_avg_Angle | 41.658499  | ID_5  |
| 0days  | LF_avg_Angle | 45.8373681 | ID_6  |
| 0days  | LF_avg_Angle | 40.9825227 | ID_7  |
| 0days  | LF_avg_Angle | 46.3197746 | ID_8  |
| 0days  | LF_avg_Angle | 39.7405324 | ID_9  |
| 0days  | LF_avg_Angle | 41.446467  | ID_10 |
| 0days  | LF_avg_Angle | 47.9112928 | ID_11 |
| 0days  | LF_avg_Angle | 42.0872957 | ID_12 |
| 0days  | LF_avg_Angle | 40.4297428 | ID_13 |

|        |              |            |       |
|--------|--------------|------------|-------|
| 3days  | LF_avg_Angle | 40.1017464 | ID_1  |
| 3days  | LF_avg_Angle | 38.7049219 | ID_2  |
| 3days  | LF_avg_Angle | 38.4627874 | ID_3  |
| 3days  | LF_avg_Angle | 45.6049819 | ID_4  |
| 3days  | LF_avg_Angle | 44.6651621 | ID_5  |
| 3days  | LF_avg_Angle | 41.476749  | ID_6  |
| 3days  | LF_avg_Angle | 41.566284  | ID_7  |
| 3days  | LF_avg_Angle | 41.9276646 | ID_8  |
| 7days  | LF_avg_Angle | 43.3831178 | ID_1  |
| 7days  | LF_avg_Angle | 43.9012933 | ID_2  |
| 7days  | LF_avg_Angle | 45.2450563 | ID_3  |
| 7days  | LF_avg_Angle | 44.252576  | ID_4  |
| 7days  | LF_avg_Angle | 47.1048525 | ID_5  |
| 7days  | LF_avg_Angle | 38.8874691 | ID_6  |
| 7days  | LF_avg_Angle | 43.4536674 | ID_7  |
| 7days  | LF_avg_Angle | 41.652114  | ID_8  |
| 7days  | LF_avg_Angle | 44.5867547 | ID_9  |
| 14days | LF_avg_Angle | 38.9225394 | ID_1  |
| 14days | LF_avg_Angle | 45.8809814 | ID_2  |
| 14days | LF_avg_Angle | 45.7993107 | ID_3  |
| 14days | LF_avg_Angle | 38.4470849 | ID_4  |
| 14days | LF_avg_Angle | 39.600663  | ID_5  |
| 14days | LF_avg_Angle | 38.4059727 | ID_6  |
| 14days | LF_avg_Angle | 37.2801076 | ID_7  |
| 14days | LF_avg_Angle | 37.5934035 | ID_8  |
| 14days | LF_avg_Angle | 39.6993253 | ID_9  |
| 14days | LF_avg_Angle | 43.2303069 | ID_10 |
| 14days | LF_avg_Angle | 39.7132891 | ID_11 |
| 21days | LF_avg_Angle | 41.9922658 | ID_1  |
| 21days | LF_avg_Angle | 38.1049868 | ID_2  |
| 21days | LF_avg_Angle | 38.8365056 | ID_3  |
| 21days | LF_avg_Angle | 44.9341325 | ID_4  |
| 21days | LF_avg_Angle | 45.5550475 | ID_5  |
| 21days | LF_avg_Angle | 41.8214176 | ID_6  |
| 21days | LF_avg_Angle | 42.9731244 | ID_7  |
| 21days | LF_avg_Angle | 43.8879138 | ID_8  |
| 21days | LF_avg_Angle | 40.3193466 | ID_9  |
| 21days | LF_avg_Angle | 45.9123759 | ID_10 |
| 0days  | LF_max       | 71.3555474 | ID_1  |
| 0days  | LF_max       | 73.6205435 | ID_2  |
| 0days  | LF_max       | 72.7194728 | ID_3  |
| 0days  | LF_max       | 73.9135913 | ID_4  |
| 0days  | LF_max       | 72.1734714 | ID_5  |
| 0days  | LF_max       | 76.8629446 | ID_6  |
| 0days  | LF_max       | 65.9668713 | ID_7  |
| 0days  | LF_max       | 71.6323368 | ID_8  |
| 0days  | LF_max       | 68.1159155 | ID_9  |
| 0days  | LF_max       | 63.0155705 | ID_10 |
| 0days  | LF_max       | 71.6518054 | ID_11 |
| 0days  | LF_max       | 66.2048668 | ID_12 |
| 0days  | LF_max       | 67.1179287 | ID_13 |
| 3days  | LF_max       | 62.8944716 | ID_1  |
| 3days  | LF_max       | 62.0243492 | ID_2  |
| 3days  | LF_max       | 64.4625047 | ID_3  |
| 3days  | LF_max       | 65.1996682 | ID_4  |
| 3days  | LF_max       | 63.0171567 | ID_5  |

|        |         |            |       |
|--------|---------|------------|-------|
| 3days  | LF__max | 67.9348204 | ID_6  |
| 3days  | LF__max | 69.0442159 | ID_7  |
| 3days  | LF__max | 69.2306117 | ID_8  |
| 7days  | LF__max | 74.7220877 | ID_1  |
| 7days  | LF__max | 60.1052282 | ID_2  |
| 7days  | LF__max | 73.5050624 | ID_3  |
| 7days  | LF__max | 66.6297859 | ID_4  |
| 7days  | LF__max | 70.7693029 | ID_5  |
| 7days  | LF__max | 62.5451288 | ID_6  |
| 7days  | LF__max | 72.0979674 | ID_7  |
| 7days  | LF__max | 67.5696475 | ID_8  |
| 7days  | LF__max | 61.6892277 | ID_9  |
| 14days | LF__max | 70.8544514 | ID_1  |
| 14days | LF__max | 69.2382287 | ID_2  |
| 14days | LF__max | 71.0093515 | ID_3  |
| 14days | LF__max | 59.1540156 | ID_4  |
| 14days | LF__max | 58.9617768 | ID_5  |
| 14days | LF__max | 65.8127948 | ID_6  |
| 14days | LF__max | 60.3439419 | ID_7  |
| 14days | LF__max | 58.0746393 | ID_8  |
| 14days | LF__max | 63.8947623 | ID_9  |
| 14days | LF__max | 62.8024434 | ID_10 |
| 14days | LF__max | 70.2428672 | ID_11 |
| 21days | LF__max | 67.897832  | ID_1  |
| 21days | LF__max | 68.5109692 | ID_2  |
| 21days | LF__max | 72.0326392 | ID_3  |
| 21days | LF__max | 70.721441  | ID_4  |
| 21days | LF__max | 67.4516664 | ID_5  |
| 21days | LF__max | 62.7378209 | ID_6  |
| 21days | LF__max | 67.4799931 | ID_7  |
| 21days | LF__max | 63.9467885 | ID_8  |
| 21days | LF__max | 59.830988  | ID_9  |
| 21days | LF__max | 73.2086895 | ID_10 |
| 0days  | LF__min | 23.8666621 | ID_1  |
| 0days  | LF__min | 22.012441  | ID_2  |
| 0days  | LF__min | 23.2117812 | ID_3  |
| 0days  | LF__min | 17.4185718 | ID_4  |
| 0days  | LF__min | 13.0684365 | ID_5  |
| 0days  | LF__min | 13.8849846 | ID_6  |
| 0days  | LF__min | 17.3052319 | ID_7  |
| 0days  | LF__min | 21.8392712 | ID_8  |
| 0days  | LF__min | 17.7712817 | ID_9  |
| 0days  | LF__min | 13.9475869 | ID_10 |
| 0days  | LF__min | 20.8303449 | ID_11 |
| 0days  | LF__min | 23.4446216 | ID_12 |
| 0days  | LF__min | 22.143269  | ID_13 |
| 3days  | LF__min | 20.0237983 | ID_1  |
| 3days  | LF__min | 16.8376944 | ID_2  |
| 3days  | LF__min | 19.4127383 | ID_3  |
| 3days  | LF__min | 24.6163476 | ID_4  |
| 3days  | LF__min | 27.4194864 | ID_5  |
| 3days  | LF__min | 24.5957825 | ID_6  |
| 3days  | LF__min | 19.5470476 | ID_7  |
| 3days  | LF__min | 15.5388239 | ID_8  |
| 7days  | LF__min | 20.5571831 | ID_1  |
| 7days  | LF__min | 25.0332006 | ID_2  |



|        |               |            |       |
|--------|---------------|------------|-------|
| 7days  | LF__min       | 22.8107086 | ID_3  |
| 7days  | LF__min       | 28.962962  | ID_4  |
| 7days  | LF__min       | 26.9066641 | ID_5  |
| 7days  | LF__min       | 15.8483888 | ID_6  |
| 7days  | LF__min       | 17.052464  | ID_7  |
| 7days  | LF__min       | 18.0987147 | ID_8  |
| 7days  | LF__min       | 13.8332881 | ID_9  |
| 14days | LF__min       | 18.1671132 | ID_1  |
| 14days | LF__min       | 21.0296377 | ID_2  |
| 14days | LF__min       | 26.4345983 | ID_3  |
| 14days | LF__min       | 23.4241709 | ID_4  |
| 14days | LF__min       | 19.4164151 | ID_5  |
| 14days | LF__min       | 17.8566158 | ID_6  |
| 14days | LF__min       | 20.1419256 | ID_7  |
| 14days | LF__min       | 22.1649327 | ID_8  |
| 14days | LF__min       | 15.9152806 | ID_9  |
| 14days | LF__min       | 19.8013228 | ID_10 |
| 14days | LF__min       | 16.1697534 | ID_11 |
| 21days | LF__min       | 22.1063674 | ID_1  |
| 21days | LF__min       | 14.0338723 | ID_2  |
| 21days | LF__min       | 15.5453273 | ID_3  |
| 21days | LF__min       | 21.0632339 | ID_4  |
| 21days | LF__min       | 18.8898574 | ID_5  |
| 21days | LF__min       | 22.6806905 | ID_6  |
| 21days | LF__min       | 20.0356047 | ID_7  |
| 21days | LF__min       | 16.0254051 | ID_8  |
| 21days | LF__min       | 22.2348411 | ID_9  |
| 21days | LF__min       | 17.4894865 | ID_10 |
| 0days  | RB__avg_Angle | 42.8575696 | ID_1  |
| 0days  | RB__avg_Angle | 47.8907736 | ID_2  |
| 0days  | RB__avg_Angle | 45.4616962 | ID_3  |
| 0days  | RB__avg_Angle | 46.4126777 | ID_4  |
| 0days  | RB__avg_Angle | 51.1492484 | ID_5  |
| 0days  | RB__avg_Angle | 48.938546  | ID_6  |
| 0days  | RB__avg_Angle | 50.3347242 | ID_7  |
| 0days  | RB__avg_Angle | 42.5578142 | ID_8  |
| 0days  | RB__avg_Angle | 45.3973929 | ID_9  |
| 0days  | RB__avg_Angle | 48.2625869 | ID_10 |
| 0days  | RB__avg_Angle | 49.9375309 | ID_11 |
| 0days  | RB__avg_Angle | 47.5111561 | ID_12 |
| 0days  | RB__avg_Angle | 46.988602  | ID_13 |
| 3days  | RB__avg_Angle | 56.6963994 | ID_1  |
| 3days  | RB__avg_Angle | 50.0101968 | ID_2  |
| 3days  | RB__avg_Angle | 48.2409531 | ID_3  |
| 3days  | RB__avg_Angle | 56.5917773 | ID_4  |
| 3days  | RB__avg_Angle | 53.4249406 | ID_5  |
| 3days  | RB__avg_Angle | 50.6791906 | ID_6  |
| 3days  | RB__avg_Angle | 53.1195539 | ID_7  |
| 3days  | RB__avg_Angle | 52.5745364 | ID_8  |
| 7days  | RB__avg_Angle | 50.1109123 | ID_1  |
| 7days  | RB__avg_Angle | 43.3631402 | ID_2  |
| 7days  | RB__avg_Angle | 47.2184043 | ID_3  |
| 7days  | RB__avg_Angle | 47.295858  | ID_4  |
| 7days  | RB__avg_Angle | 47.4237984 | ID_5  |
| 7days  | RB__avg_Angle | 49.2825584 | ID_6  |
| 7days  | RB__avg_Angle | 45.6127664 | ID_7  |

|        |              |            |       |
|--------|--------------|------------|-------|
| 7days  | RB_avg_Angle | 45.5638926 | ID_8  |
| 7days  | RB_avg_Angle | 57.9434523 | ID_9  |
| 14days | RB_avg_Angle | 52.7787434 | ID_1  |
| 14days | RB_avg_Angle | 44.1025601 | ID_2  |
| 14days | RB_avg_Angle | 44.1475928 | ID_3  |
| 14days | RB_avg_Angle | 46.4501452 | ID_4  |
| 14days | RB_avg_Angle | 51.0710783 | ID_5  |
| 14days | RB_avg_Angle | 54.6343834 | ID_6  |
| 14days | RB_avg_Angle | 52.0154762 | ID_7  |
| 14days | RB_avg_Angle | 52.7532014 | ID_8  |
| 14days | RB_avg_Angle | 54.9479005 | ID_9  |
| 14days | RB_avg_Angle | 47.1932394 | ID_10 |
| 14days | RB_avg_Angle | 43.3683346 | ID_11 |
| 21days | RB_avg_Angle | 46.5341358 | ID_1  |
| 21days | RB_avg_Angle | 49.6472984 | ID_2  |
| 21days | RB_avg_Angle | 53.0770775 | ID_3  |
| 21days | RB_avg_Angle | 47.5182862 | ID_4  |
| 21days | RB_avg_Angle | 51.0303299 | ID_5  |
| 21days | RB_avg_Angle | 51.8459975 | ID_6  |
| 21days | RB_avg_Angle | 47.550468  | ID_7  |
| 21days | RB_avg_Angle | 43.8839373 | ID_8  |
| 21days | RB_avg_Angle | 53.6451286 | ID_9  |
| 21days | RB_avg_Angle | 48.3182814 | ID_10 |
| 0days  | RB_max       | 79.2524699 | ID_1  |
| 0days  | RB_max       | 76.5545904 | ID_2  |
| 0days  | RB_max       | 76.2632394 | ID_3  |
| 0days  | RB_max       | 74.4156858 | ID_4  |
| 0days  | RB_max       | 69.7314665 | ID_5  |
| 0days  | RB_max       | 73.1861504 | ID_6  |
| 0days  | RB_max       | 78.4634387 | ID_7  |
| 0days  | RB_max       | 77.4835416 | ID_8  |
| 0days  | RB_max       | 74.4808528 | ID_9  |
| 0days  | RB_max       | 77.6515358 | ID_10 |
| 0days  | RB_max       | 70.9886417 | ID_11 |
| 0days  | RB_max       | 73.2560674 | ID_12 |
| 0days  | RB_max       | 74.6354537 | ID_13 |
| 3days  | RB_max       | 74.4457326 | ID_1  |
| 3days  | RB_max       | 73.6827252 | ID_2  |
| 3days  | RB_max       | 80.1357593 | ID_3  |
| 3days  | RB_max       | 73.6737137 | ID_4  |
| 3days  | RB_max       | 74.8518291 | ID_5  |
| 3days  | RB_max       | 76.7463005 | ID_6  |
| 3days  | RB_max       | 70.605494  | ID_7  |
| 3days  | RB_max       | 81.7661769 | ID_8  |
| 7days  | RB_max       | 78.607353  | ID_1  |
| 7days  | RB_max       | 73.582011  | ID_2  |
| 7days  | RB_max       | 76.0878981 | ID_3  |
| 7days  | RB_max       | 75.9765241 | ID_4  |
| 7days  | RB_max       | 77.4873907 | ID_5  |
| 7days  | RB_max       | 74.3065407 | ID_6  |
| 7days  | RB_max       | 67.1127163 | ID_7  |
| 7days  | RB_max       | 74.5862763 | ID_8  |
| 7days  | RB_max       | 72.2565461 | ID_9  |
| 14days | RB_max       | 80.9040511 | ID_1  |
| 14days | RB_max       | 71.0466587 | ID_2  |
| 14days | RB_max       | 75.2850996 | ID_3  |

|        |        |            |       |
|--------|--------|------------|-------|
| 14days | RB_max | 79.4131704 | ID_4  |
| 14days | RB_max | 76.2390665 | ID_5  |
| 14days | RB_max | 72.1987127 | ID_6  |
| 14days | RB_max | 75.1817158 | ID_7  |
| 14days | RB_max | 75.8606938 | ID_8  |
| 14days | RB_max | 81.5700622 | ID_9  |
| 14days | RB_max | 71.4506763 | ID_10 |
| 14days | RB_max | 74.1709864 | ID_11 |
| 21days | RB_max | 77.0178975 | ID_1  |
| 21days | RB_max | 74.621803  | ID_2  |
| 21days | RB_max | 74.5669036 | ID_3  |
| 21days | RB_max | 69.2736063 | ID_4  |
| 21days | RB_max | 76.0697052 | ID_5  |
| 21days | RB_max | 76.5524895 | ID_6  |
| 21days | RB_max | 78.7967047 | ID_7  |
| 21days | RB_max | 69.5051639 | ID_8  |
| 21days | RB_max | 79.9013704 | ID_9  |
| 21days | RB_max | 70.4869638 | ID_10 |
| 0days  | RB_min | 11.0013328 | ID_1  |
| 0days  | RB_min | 16.3580449 | ID_2  |
| 0days  | RB_min | 12.0878673 | ID_3  |
| 0days  | RB_min | 14.0298275 | ID_4  |
| 0days  | RB_min | 12.3896594 | ID_5  |
| 0days  | RB_min | 15.1524297 | ID_6  |
| 0days  | RB_min | 13.928863  | ID_7  |
| 0days  | RB_min | 17.8776828 | ID_8  |
| 0days  | RB_min | 8.49166957 | ID_9  |
| 0days  | RB_min | 13.9296039 | ID_10 |
| 0days  | RB_min | 16.3993358 | ID_11 |
| 0days  | RB_min | 9.32792728 | ID_12 |
| 0days  | RB_min | 15.0074391 | ID_13 |
| 3days  | RB_min | 18.9303141 | ID_1  |
| 3days  | RB_min | 8.110522   | ID_2  |
| 3days  | RB_min | 14.7929504 | ID_3  |
| 3days  | RB_min | 23.3820277 | ID_4  |
| 3days  | RB_min | 21.5492284 | ID_5  |
| 3days  | RB_min | 15.2845306 | ID_6  |
| 3days  | RB_min | 11.8865389 | ID_7  |
| 3days  | RB_min | 17.4785325 | ID_8  |
| 7days  | RB_min | 10.9708971 | ID_1  |
| 7days  | RB_min | 13.8859988 | ID_2  |
| 7days  | RB_min | 14.3423761 | ID_3  |
| 7days  | RB_min | 15.0188234 | ID_4  |
| 7days  | RB_min | 13.8104608 | ID_5  |
| 7days  | RB_min | 19.1767414 | ID_6  |
| 7days  | RB_min | 10.7747456 | ID_7  |
| 7days  | RB_min | 9.09689337 | ID_8  |
| 7days  | RB_min | 20.9777243 | ID_9  |
| 14days | RB_min | 13.6894278 | ID_1  |
| 14days | RB_min | 19.3527546 | ID_2  |
| 14days | RB_min | 16.8424035 | ID_3  |
| 14days | RB_min | 13.6571717 | ID_4  |
| 14days | RB_min | 12.8456176 | ID_5  |
| 14days | RB_min | 18.6861882 | ID_6  |
| 14days | RB_min | 12.9638358 | ID_7  |
| 14days | RB_min | 13.1649191 | ID_8  |

|        |              |            |       |
|--------|--------------|------------|-------|
| 14days | RB_min       | 18.5242693 | ID_9  |
| 14days | RB_min       | 16.5177571 | ID_10 |
| 14days | RB_min       | 15.4198488 | ID_11 |
| 21days | RB_min       | 13.8780983 | ID_1  |
| 21days | RB_min       | 18.4699646 | ID_2  |
| 21days | RB_min       | 18.3929991 | ID_3  |
| 21days | RB_min       | 21.705148  | ID_4  |
| 21days | RB_min       | 16.0258867 | ID_5  |
| 21days | RB_min       | 19.026834  | ID_6  |
| 21days | RB_min       | 15.4930936 | ID_7  |
| 21days | RB_min       | 7.86374811 | ID_8  |
| 21days | RB_min       | 12.7132641 | ID_9  |
| 21days | RB_min       | 19.236803  | ID_10 |
| 0days  | RF_avg_Angle | 42.5470983 | ID_1  |
| 0days  | RF_avg_Angle | 42.0275756 | ID_2  |
| 0days  | RF_avg_Angle | 44.9028249 | ID_3  |
| 0days  | RF_avg_Angle | 47.1531512 | ID_4  |
| 0days  | RF_avg_Angle | 44.5139313 | ID_5  |
| 0days  | RF_avg_Angle | 38.5663288 | ID_6  |
| 0days  | RF_avg_Angle | 41.2785736 | ID_7  |
| 0days  | RF_avg_Angle | 41.1782994 | ID_8  |
| 0days  | RF_avg_Angle | 40.1662729 | ID_9  |
| 0days  | RF_avg_Angle | 39.1084113 | ID_10 |
| 0days  | RF_avg_Angle | 44.0872109 | ID_11 |
| 0days  | RF_avg_Angle | 38.1311052 | ID_12 |
| 0days  | RF_avg_Angle | 38.6904266 | ID_13 |
| 3days  | RF_avg_Angle | 41.245129  | ID_1  |
| 3days  | RF_avg_Angle | 39.4679567 | ID_2  |
| 3days  | RF_avg_Angle | 42.4764923 | ID_3  |
| 3days  | RF_avg_Angle | 48.3882549 | ID_4  |
| 3days  | RF_avg_Angle | 40.0920999 | ID_5  |
| 3days  | RF_avg_Angle | 38.9129161 | ID_6  |
| 3days  | RF_avg_Angle | 34.324454  | ID_7  |
| 3days  | RF_avg_Angle | 37.616126  | ID_8  |
| 7days  | RF_avg_Angle | 42.4987069 | ID_1  |
| 7days  | RF_avg_Angle | 42.3441563 | ID_2  |
| 7days  | RF_avg_Angle | 43.7749879 | ID_3  |
| 7days  | RF_avg_Angle | 43.2740301 | ID_4  |
| 7days  | RF_avg_Angle | 43.4596765 | ID_5  |
| 7days  | RF_avg_Angle | 40.4807501 | ID_6  |
| 7days  | RF_avg_Angle | 41.7278437 | ID_7  |
| 7days  | RF_avg_Angle | 43.4188312 | ID_8  |
| 7days  | RF_avg_Angle | 44.9213287 | ID_9  |
| 14days | RF_avg_Angle | 44.0113542 | ID_1  |
| 14days | RF_avg_Angle | 46.7872042 | ID_2  |
| 14days | RF_avg_Angle | 39.700803  | ID_3  |
| 14days | RF_avg_Angle | 43.9078137 | ID_4  |
| 14days | RF_avg_Angle | 46.5437653 | ID_5  |
| 14days | RF_avg_Angle | 42.4092405 | ID_6  |
| 14days | RF_avg_Angle | 40.5157696 | ID_7  |
| 14days | RF_avg_Angle | 42.6896769 | ID_8  |
| 14days | RF_avg_Angle | 36.7752737 | ID_9  |
| 14days | RF_avg_Angle | 43.9457101 | ID_10 |
| 14days | RF_avg_Angle | 37.4580785 | ID_11 |
| 21days | RF_avg_Angle | 42.4759573 | ID_1  |
| 21days | RF_avg_Angle | 44.5900231 | ID_2  |

|        |              |            |       |
|--------|--------------|------------|-------|
| 21days | RF_avg_Angle | 47.919704  | ID_3  |
| 21days | RF_avg_Angle | 41.8289005 | ID_4  |
| 21days | RF_avg_Angle | 40.3849643 | ID_5  |
| 21days | RF_avg_Angle | 42.0178862 | ID_6  |
| 21days | RF_avg_Angle | 44.1430753 | ID_7  |
| 21days | RF_avg_Angle | 39.145023  | ID_8  |
| 21days | RF_avg_Angle | 41.2880727 | ID_9  |
| 21days | RF_avg_Angle | 45.7266488 | ID_10 |
| 0days  | RF_max       | 65.1650482 | ID_1  |
| 0days  | RF_max       | 63.5633778 | ID_2  |
| 0days  | RF_max       | 66.2751629 | ID_3  |
| 0days  | RF_max       | 63.3982971 | ID_4  |
| 0days  | RF_max       | 68.1431847 | ID_5  |
| 0days  | RF_max       | 63.1142133 | ID_6  |
| 0days  | RF_max       | 68.3333809 | ID_7  |
| 0days  | RF_max       | 65.4583984 | ID_8  |
| 0days  | RF_max       | 66.4922866 | ID_9  |
| 0days  | RF_max       | 63.9437223 | ID_10 |
| 0days  | RF_max       | 65.649095  | ID_11 |
| 0days  | RF_max       | 61.7136828 | ID_12 |
| 0days  | RF_max       | 64.8635144 | ID_13 |
| 3days  | RF_max       | 58.1757834 | ID_1  |
| 3days  | RF_max       | 57.18388   | ID_2  |
| 3days  | RF_max       | 61.873653  | ID_3  |
| 3days  | RF_max       | 60.3414347 | ID_4  |
| 3days  | RF_max       | 64.3680365 | ID_5  |
| 3days  | RF_max       | 62.9111936 | ID_6  |
| 3days  | RF_max       | 69.0835872 | ID_7  |
| 3days  | RF_max       | 66.1051816 | ID_8  |
| 7days  | RF_max       | 64.2548686 | ID_1  |
| 7days  | RF_max       | 66.1595638 | ID_2  |
| 7days  | RF_max       | 67.2837534 | ID_3  |
| 7days  | RF_max       | 66.3447234 | ID_4  |
| 7days  | RF_max       | 66.70868   | ID_5  |
| 7days  | RF_max       | 64.8272284 | ID_6  |
| 7days  | RF_max       | 65.2065834 | ID_7  |
| 7days  | RF_max       | 65.6265089 | ID_8  |
| 7days  | RF_max       | 81.2978772 | ID_9  |
| 14days | RF_max       | 65.7958842 | ID_1  |
| 14days | RF_max       | 65.0531998 | ID_2  |
| 14days | RF_max       | 68.1754157 | ID_3  |
| 14days | RF_max       | 71.5300217 | ID_4  |
| 14days | RF_max       | 68.488436  | ID_5  |
| 14days | RF_max       | 61.4620513 | ID_6  |
| 14days | RF_max       | 64.3952247 | ID_7  |
| 14days | RF_max       | 72.7651226 | ID_8  |
| 14days | RF_max       | 65.5283881 | ID_9  |
| 14days | RF_max       | 74.306757  | ID_10 |
| 14days | RF_max       | 65.7601374 | ID_11 |
| 21days | RF_max       | 63.3070223 | ID_1  |
| 21days | RF_max       | 65.2948342 | ID_2  |
| 21days | RF_max       | 72.7203099 | ID_3  |
| 21days | RF_max       | 68.5884133 | ID_4  |
| 21days | RF_max       | 61.235668  | ID_5  |
| 21days | RF_max       | 63.9349587 | ID_6  |
| 21days | RF_max       | 66.5295257 | ID_7  |

|        |        |            |       |
|--------|--------|------------|-------|
| 21days | RF_max | 68.8908511 | ID_8  |
| 21days | RF_max | 64.5858355 | ID_9  |
| 21days | RF_max | 65.0675158 | ID_10 |
| 0days  | RF_min | 24.6319339 | ID_1  |
| 0days  | RF_min | 14.7688315 | ID_2  |
| 0days  | RF_min | 18.0309036 | ID_3  |
| 0days  | RF_min | 21.744939  | ID_4  |
| 0days  | RF_min | 19.2623516 | ID_5  |
| 0days  | RF_min | 16.7684322 | ID_6  |
| 0days  | RF_min | 21.5467565 | ID_7  |
| 0days  | RF_min | 17.1549487 | ID_8  |
| 0days  | RF_min | 18.826316  | ID_9  |
| 0days  | RF_min | 23.5426925 | ID_10 |
| 0days  | RF_min | 22.3413851 | ID_11 |
| 0days  | RF_min | 22.3218924 | ID_12 |
| 0days  | RF_min | 21.0932269 | ID_13 |
| 3days  | RF_min | 23.8001133 | ID_1  |
| 3days  | RF_min | 21.5756968 | ID_2  |
| 3days  | RF_min | 22.6118278 | ID_3  |
| 3days  | RF_min | 24.4239223 | ID_4  |
| 3days  | RF_min | 17.9108196 | ID_5  |
| 3days  | RF_min | 22.6727528 | ID_6  |
| 3days  | RF_min | 13.8024176 | ID_7  |
| 3days  | RF_min | 17.578919  | ID_8  |
| 7days  | RF_min | 22.6544294 | ID_1  |
| 7days  | RF_min | 18.8966195 | ID_2  |
| 7days  | RF_min | 18.9814378 | ID_3  |
| 7days  | RF_min | 17.7187437 | ID_4  |
| 7days  | RF_min | 20.6005688 | ID_5  |
| 7days  | RF_min | 13.0939727 | ID_6  |
| 7days  | RF_min | 23.2448505 | ID_7  |
| 7days  | RF_min | 19.0907271 | ID_8  |
| 7days  | RF_min | 19.7519316 | ID_9  |
| 14days | RF_min | 27.0984077 | ID_1  |
| 14days | RF_min | 23.841235  | ID_2  |
| 14days | RF_min | 12.7051403 | ID_3  |
| 14days | RF_min | 14.6091791 | ID_4  |
| 14days | RF_min | 16.563378  | ID_5  |
| 14days | RF_min | 14.4490435 | ID_6  |
| 14days | RF_min | 17.6629117 | ID_7  |
| 14days | RF_min | 18.5965583 | ID_8  |
| 14days | RF_min | 15.3036826 | ID_9  |
| 14days | RF_min | 12.5284398 | ID_10 |
| 14days | RF_min | 20.3577251 | ID_11 |
| 21days | RF_min | 24.6862726 | ID_1  |
| 21days | RF_min | 19.9209133 | ID_2  |
| 21days | RF_min | 22.1483525 | ID_3  |
| 21days | RF_min | 16.1469054 | ID_4  |
| 21days | RF_min | 21.1234341 | ID_5  |
| 21days | RF_min | 17.4537046 | ID_6  |
| 21days | RF_min | 21.6309296 | ID_7  |
| 21days | RF_min | 13.7761458 | ID_8  |
| 21days | RF_min | 17.7483715 | ID_9  |
| 21days | RF_min | 24.29959   | ID_10 |

**Suppl. Table 17: Summary of bottom angle analysis**

| day    | Measure       | Mean        | SD         |
|--------|---------------|-------------|------------|
| 0days  | LB__avg_Angle | 47.75408182 | 3.3690005  |
| 3days  | LB__avg_Angle | 50.15381894 | 4.33437741 |
| 7days  | LB__avg_Angle | 50.21187711 | 2.8908405  |
| 14days | LB__avg_Angle | 51.00199275 | 2.75730422 |
| 21days | LB__avg_Angle | 49.7391305  | 4.06844479 |
| 0days  | LB__max       | 74.63662441 | 3.88910043 |
| 3days  | LB__max       | 75.46730787 | 3.88677426 |
| 7days  | LB__max       | 73.87982019 | 3.265263   |
| 14days | LB__max       | 74.52318194 | 3.51678681 |
| 21days | LB__max       | 75.60318105 | 3.12537027 |
| 0days  | LB__min       | 15.40789053 | 3.83166016 |
| 3days  | LB__min       | 18.12057878 | 5.21855366 |
| 7days  | LB__min       | 14.90424509 | 4.87824285 |
| 14days | LB__min       | 16.16849516 | 3.10961442 |
| 21days | LB__min       | 15.5199302  | 4.45887447 |
| 0days  | LF__avg_Angle | 43.23965924 | 2.78945572 |
| 3days  | LF__avg_Angle | 41.56378715 | 2.56394347 |
| 7days  | LF__avg_Angle | 43.60743345 | 2.30625999 |
| 14days | LF__avg_Angle | 40.41572586 | 3.10462092 |
| 21days | LF__avg_Angle | 42.43371163 | 2.73292041 |
| 0days  | LF__max       | 70.334682   | 3.92349668 |
| 3days  | LF__max       | 65.47597481 | 2.89340866 |
| 7days  | LF__max       | 67.73704872 | 5.4002759  |
| 14days | LF__max       | 64.580843   | 5.10775037 |
| 21days | LF__max       | 67.38188278 | 4.19884365 |
| 0days  | LF__min       | 19.28803726 | 3.91814991 |
| 3days  | LF__min       | 20.99896488 | 4.13953225 |
| 7days  | LF__min       | 21.01150822 | 5.24331798 |
| 14days | LF__min       | 20.04743327 | 3.13943973 |
| 21days | LF__min       | 19.0104686  | 3.10427479 |
| 0days  | RB__avg_Angle | 47.20771682 | 2.66120631 |
| 3days  | RB__avg_Angle | 52.66719351 | 3.00065815 |
| 7days  | RB__avg_Angle | 48.20164253 | 4.17102957 |
| 14days | RB__avg_Angle | 49.40569593 | 4.42802183 |
| 21days | RB__avg_Angle | 49.30509406 | 3.10780087 |
| 0days  | RB__max       | 75.10485648 | 2.85876929 |
| 3days  | RB__max       | 75.7384664  | 3.66409559 |
| 7days  | RB__max       | 74.44480626 | 3.37197267 |
| 14days | RB__max       | 75.75644489 | 3.61049547 |
| 21days | RB__max       | 74.6792608  | 3.78181284 |
| 0days  | RB__min       | 13.53705253 | 2.78885881 |
| 3days  | RB__min       | 16.42683058 | 5.01051585 |
| 7days  | RB__min       | 14.22829565 | 3.87040931 |
| 14days | RB__min       | 15.60583578 | 2.49934934 |
| 21days | RB__min       | 16.28058394 | 4.01370633 |
| 0days  | RF__avg_Angle | 41.71932383 | 2.822009   |
| 3days  | RF__avg_Angle | 40.31542859 | 4.08163483 |
| 7days  | RF__avg_Angle | 42.87781238 | 1.28772978 |
| 14days | RF__avg_Angle | 42.24951723 | 3.32277835 |
| 21days | RF__avg_Angle | 42.95202551 | 2.63924393 |
| 0days  | RF__max       | 65.08564342 | 1.94780001 |
| 3days  | RF__max       | 62.50534375 | 4.00019755 |
| 7days  | RF__max       | 67.52330968 | 5.25149054 |
| 14days | RF__max       | 67.56914894 | 3.91888757 |

|        |         |             |            |
|--------|---------|-------------|------------|
| 21days | RF__max | 66.01549344 | 3.30116977 |
| 0days  | RF__min | 20.15650845 | 2.92822757 |
| 3days  | RF__min | 20.54705866 | 3.71679916 |
| 7days  | RF__min | 19.33703122 | 2.95847428 |
| 14days | RF__min | 17.6105183  | 4.61167268 |
| 21days | RF min  | 19.89346194 | 3.5592443  |



**Suppl. Table 18: Statistical test of bottom angle analysis**

| Measure     | group1 | group2 | p.adj      | sig  | Test*                  |
|-------------|--------|--------|------------|------|------------------------|
| LB__avg_Ang | 0days  | 3days  | 0.35602904 | ns   | Repeat ANOVA + PH test |
| LB__avg_Ang | 0days  | 7days  | 0.35602904 | ns   | Repeat ANOVA + PH test |
| LB__avg_Ang | 0days  | 14days | 0.1169572  | ns   | Repeat ANOVA + PH test |
| LB__avg_Ang | 0days  | 21days | 0.35602904 | ns   | Repeat ANOVA + PH test |
| LB__max2    | 0days  | 3days  |            | 1 ns | Repeat ANOVA + PH test |
| LB__max2    | 0days  | 7days  |            | 1 ns | Repeat ANOVA + PH test |
| LB__max2    | 0days  | 14days |            | 1 ns | Repeat ANOVA + PH test |
| LB__max2    | 0days  | 21days |            | 1 ns | Repeat ANOVA + PH test |
| LB__min2    | 0days  | 3days  | 0.3863356  | ns   | Repeat ANOVA + PH test |
| LB__min2    | 0days  | 7days  |            | 1 ns | Repeat ANOVA + PH test |
| LB__min2    | 0days  | 14days |            | 1 ns | Repeat ANOVA + PH test |
| LB__min2    | 0days  | 21days |            | 1 ns | Repeat ANOVA + PH test |
| LF__avg_Ang | 0days  | 3days  | 0.91277765 | ns   | Repeat ANOVA + PH test |
| LF__avg_Ang | 0days  | 7days  |            | 1 ns | Repeat ANOVA + PH test |
| LF__avg_Ang | 0days  | 14days | 0.23150504 | ns   | Repeat ANOVA + PH test |
| LF__avg_Ang | 0days  | 21days |            | 1 ns | Repeat ANOVA + PH test |
| LF__max2    | 0days  | 3days  | 0.00899179 | **   | Repeat ANOVA + PH test |
| LF__max2    | 0days  | 7days  | 0.10685635 | ns   | Repeat ANOVA + PH test |
| LF__max2    | 0days  | 14days | 0.00048251 | ***  | Repeat ANOVA + PH test |
| LF__max2    | 0days  | 21days | 0.10685635 | ns   | Repeat ANOVA + PH test |
| LF__min2    | 0days  | 3days  |            | 1 ns | Repeat ANOVA + PH test |
| LF__min2    | 0days  | 7days  |            | 1 ns | Repeat ANOVA + PH test |
| LF__min2    | 0days  | 14days |            | 1 ns | Repeat ANOVA + PH test |
| LF__min2    | 0days  | 21days |            | 1 ns | Repeat ANOVA + PH test |
| RB__avg_Ang | 0days  | 3days  | 0.0034547  | **   | Repeat ANOVA + PH test |
| RB__avg_Ang | 0days  | 7days  | 0.52765777 | ns   | Repeat ANOVA + PH test |
| RB__avg_Ang | 0days  | 14days | 0.41888756 | ns   | Repeat ANOVA + PH test |
| RB__avg_Ang | 0days  | 21days | 0.41888756 | ns   | Repeat ANOVA + PH test |
| RB__max2    | 0days  | 3days  |            | 1 ns | Repeat ANOVA + PH test |
| RB__max2    | 0days  | 7days  |            | 1 ns | Repeat ANOVA + PH test |
| RB__max2    | 0days  | 14days |            | 1 ns | Repeat ANOVA + PH test |
| RB__max2    | 0days  | 21days |            | 1 ns | Repeat ANOVA + PH test |
| RB__min2    | 0days  | 3days  | 0.29063093 | ns   | Repeat ANOVA + PH test |
| RB__min2    | 0days  | 7days  | 0.6604527  | ns   | Repeat ANOVA + PH test |
| RB__min2    | 0days  | 14days | 0.32875256 | ns   | Repeat ANOVA + PH test |
| RB__min2    | 0days  | 21days | 0.29063093 | ns   | Repeat ANOVA + PH test |
| RF__avg_Ang | 0days  | 3days  |            | 1 ns | Repeat ANOVA + PH test |
| RF__avg_Ang | 0days  | 7days  |            | 1 ns | Repeat ANOVA + PH test |
| RF__avg_Ang | 0days  | 14days |            | 1 ns | Repeat ANOVA + PH test |
| RF__avg_Ang | 0days  | 21days |            | 1 ns | Repeat ANOVA + PH test |
| RF__max2    | 0days  | 3days  | 0.38078015 | ns   | Repeat ANOVA + PH test |
| RF__max2    | 0days  | 7days  | 0.38078015 | ns   | Repeat ANOVA + PH test |
| RF__max2    | 0days  | 14days | 0.38078015 | ns   | Repeat ANOVA + PH test |
| RF__max2    | 0days  | 21days | 0.5424264  | ns   | Repeat ANOVA + PH test |
| RF__min2    | 0days  | 3days  |            | 1 ns | Repeat ANOVA + PH test |
| RF__min2    | 0days  | 7days  |            | 1 ns | Repeat ANOVA + PH test |
| RF__min2    | 0days  | 14days | 0.34870829 | ns   | Repeat ANOVA + PH test |
| RF__min2    | 0days  | 21days |            | 1 ns | Repeat ANOVA + PH test |

**Suppl. Table 19: Raw data side perspective height analysis**

| day    | Measure                    | Value      | ID    |
|--------|----------------------------|------------|-------|
| 0days  | l-back-ankle__Average_Heig | -0.558372  | ID_1  |
| 0days  | l-back-ankle__Average_Heig | -0.0928311 | ID_2  |
| 0days  | l-back-ankle__Average_Heig | -0.0743401 | ID_3  |
| 0days  | l-back-ankle__Average_Heig | 0          | ID_4  |
| 0days  | l-back-ankle__Average_Heig | 1.04525235 | ID_5  |
| 0days  | l-back-ankle__Average_Heig | 0.46756773 | ID_6  |
| 0days  | l-back-ankle__Average_Heig | -0.306591  | ID_7  |
| 0days  | l-back-ankle__Average_Heig | -0.8661789 | ID_8  |
| 0days  | l-back-ankle__Average_Heig | 0.49640185 | ID_9  |
| 0days  | l-back-ankle__Average_Heig | -0.5475319 | ID_10 |
| 0days  | l-back-ankle__Average_Heig | 1.5837189  | ID_11 |
| 0days  | l-back-ankle__Average_Heig | 0.12513895 | ID_12 |
| 0days  | l-back-ankle__Average_Heig | 0.04543175 | ID_13 |
| 3days  | l-back-ankle__Average_Heig | 1.12716089 | ID_1  |
| 3days  | l-back-ankle__Average_Heig | 0.01360356 | ID_2  |
| 3days  | l-back-ankle__Average_Heig | 0.17252705 | ID_3  |
| 3days  | l-back-ankle__Average_Heig | 0.0378154  | ID_4  |
| 3days  | l-back-ankle__Average_Heig | -0.5515274 | ID_5  |
| 3days  | l-back-ankle__Average_Heig | -0.614162  | ID_6  |
| 3days  | l-back-ankle__Average_Heig | 0.68601229 | ID_7  |
| 3days  | l-back-ankle__Average_Heig | -0.1506365 | ID_8  |
| 7days  | l-back-ankle__Average_Heig | -0.5815902 | ID_1  |
| 7days  | l-back-ankle__Average_Heig | -0.6634506 | ID_2  |
| 7days  | l-back-ankle__Average_Heig | -0.4829293 | ID_3  |
| 7days  | l-back-ankle__Average_Heig | -0.3621267 | ID_4  |
| 7days  | l-back-ankle__Average_Heig | -0.1706575 | ID_5  |
| 7days  | l-back-ankle__Average_Heig | 0.13531241 | ID_6  |
| 7days  | l-back-ankle__Average_Heig | 0.49527216 | ID_7  |
| 7days  | l-back-ankle__Average_Heig | -0.351378  | ID_8  |
| 7days  | l-back-ankle__Average_Heig | 0.06333767 | ID_9  |
| 14days | l-back-ankle__Average_Heig | -0.076288  | ID_1  |
| 14days | l-back-ankle__Average_Heig | 0.15133667 | ID_2  |
| 14days | l-back-ankle__Average_Heig | -0.1810717 | ID_3  |
| 14days | l-back-ankle__Average_Heig | 0.15781205 | ID_4  |
| 14days | l-back-ankle__Average_Heig | 0.0320646  | ID_5  |
| 14days | l-back-ankle__Average_Heig | 1.71953848 | ID_6  |
| 14days | l-back-ankle__Average_Heig | -0.032379  | ID_7  |
| 14days | l-back-ankle__Average_Heig | 0.19315873 | ID_8  |
| 14days | l-back-ankle__Average_Heig | -0.499656  | ID_9  |
| 14days | l-back-ankle__Average_Heig | 0.50124279 | ID_10 |
| 14days | l-back-ankle__Average_Heig | -0.5566281 | ID_11 |
| 21days | l-back-ankle__Average_Heig | -0.0485212 | ID_1  |
| 21days | l-back-ankle__Average_Heig | 1.00486578 | ID_2  |
| 21days | l-back-ankle__Average_Heig | 1.55559221 | ID_3  |
| 21days | l-back-ankle__Average_Heig | -0.1152101 | ID_4  |
| 21days | l-back-ankle__Average_Heig | -0.345291  | ID_5  |
| 21days | l-back-ankle__Average_Heig | -0.527633  | ID_6  |
| 21days | l-back-ankle__Average_Heig | -0.9426903 | ID_7  |
| 21days | l-back-ankle__Average_Heig | -0.4602843 | ID_8  |
| 21days | l-back-ankle__Average_Heig | -0.7781565 | ID_9  |
| 21days | l-back-ankle__Average_Heig | 0.49855778 | ID_10 |
| 0days  | l-back-ankle__Movement     | -0.9914844 | ID_1  |
| 0days  | l-back-ankle__Movement     | 0.02306694 | ID_2  |
| 0days  | l-back-ankle__Movement     | -0.2829376 | ID_3  |

|        |                             |            |       |
|--------|-----------------------------|------------|-------|
| 0days  | l-back-ankle__ Movement     | 0.74780835 | ID_4  |
| 0days  | l-back-ankle__ Movement     | 1.85085199 | ID_5  |
| 0days  | l-back-ankle__ Movement     | 2.32714528 | ID_6  |
| 0days  | l-back-ankle__ Movement     | -0.681279  | ID_7  |
| 0days  | l-back-ankle__ Movement     | -2.3847816 | ID_8  |
| 0days  | l-back-ankle__ Movement     | 1.82626031 | ID_9  |
| 0days  | l-back-ankle__ Movement     | -1.0159964 | ID_10 |
| 0days  | l-back-ankle__ Movement     | 1.79036629 | ID_11 |
| 0days  | l-back-ankle__ Movement     | 0          | ID_12 |
| 0days  | l-back-ankle__ Movement     | -0.1161506 | ID_13 |
| 3days  | l-back-ankle__ Movement     | 0.21187297 | ID_1  |
| 3days  | l-back-ankle__ Movement     | 0.2124552  | ID_2  |
| 3days  | l-back-ankle__ Movement     | 0.27917367 | ID_3  |
| 3days  | l-back-ankle__ Movement     | -1.2343567 | ID_4  |
| 3days  | l-back-ankle__ Movement     | -2.0757384 | ID_5  |
| 3days  | l-back-ankle__ Movement     | -1.9038635 | ID_6  |
| 3days  | l-back-ankle__ Movement     | 1.32226482 | ID_7  |
| 3days  | l-back-ankle__ Movement     | -0.1723685 | ID_8  |
| 7days  | l-back-ankle__ Movement     | -0.9425015 | ID_1  |
| 7days  | l-back-ankle__ Movement     | -0.9437131 | ID_2  |
| 7days  | l-back-ankle__ Movement     | -0.8073341 | ID_3  |
| 7days  | l-back-ankle__ Movement     | -0.6768367 | ID_4  |
| 7days  | l-back-ankle__ Movement     | -0.6315821 | ID_5  |
| 7days  | l-back-ankle__ Movement     | 0.10237663 | ID_6  |
| 7days  | l-back-ankle__ Movement     | 0.62162624 | ID_7  |
| 7days  | l-back-ankle__ Movement     | -0.1545461 | ID_8  |
| 7days  | l-back-ankle__ Movement     | -0.0778493 | ID_9  |
| 14days | l-back-ankle__ Movement     | 1.28366887 | ID_1  |
| 14days | l-back-ankle__ Movement     | 0.20422954 | ID_2  |
| 14days | l-back-ankle__ Movement     | -0.2875744 | ID_3  |
| 14days | l-back-ankle__ Movement     | 0.37955496 | ID_4  |
| 14days | l-back-ankle__ Movement     | 0.60992437 | ID_5  |
| 14days | l-back-ankle__ Movement     | 2.32838002 | ID_6  |
| 14days | l-back-ankle__ Movement     | 0.2006356  | ID_7  |
| 14days | l-back-ankle__ Movement     | 0.27062048 | ID_8  |
| 14days | l-back-ankle__ Movement     | -0.9489289 | ID_9  |
| 14days | l-back-ankle__ Movement     | 0.48324093 | ID_10 |
| 14days | l-back-ankle__ Movement     | -0.0334763 | ID_11 |
| 21days | l-back-ankle__ Movement     | -1.1024072 | ID_1  |
| 21days | l-back-ankle__ Movement     | 0.82531936 | ID_2  |
| 21days | l-back-ankle__ Movement     | 1.64836129 | ID_3  |
| 21days | l-back-ankle__ Movement     | -0.6164052 | ID_4  |
| 21days | l-back-ankle__ Movement     | -0.8705098 | ID_5  |
| 21days | l-back-ankle__ Movement     | -1.5564573 | ID_6  |
| 21days | l-back-ankle__ Movement     | -2.2947539 | ID_7  |
| 21days | l-back-ankle__ Movement     | -0.1685381 | ID_8  |
| 21days | l-back-ankle__ Movement     | -1.5300792 | ID_9  |
| 21days | l-back-ankle__ Movement     | 0.1785303  | ID_10 |
| 0days  | l-back-toe__ Average_Height | -0.2007638 | ID_1  |
| 0days  | l-back-toe__ Average_Height | -0.0731845 | ID_2  |
| 0days  | l-back-toe__ Average_Height | -0.1845622 | ID_3  |
| 0days  | l-back-toe__ Average_Height | 0.1274839  | ID_4  |
| 0days  | l-back-toe__ Average_Height | -0.3949807 | ID_5  |
| 0days  | l-back-toe__ Average_Height | 0.14552974 | ID_6  |
| 0days  | l-back-toe__ Average_Height | 0.25121786 | ID_7  |
| 0days  | l-back-toe__ Average_Height | -0.5706094 | ID_8  |

|        |                            |            |       |
|--------|----------------------------|------------|-------|
| 0days  | l-back-toe__Average_Height | -0.2047977 | ID_9  |
| 0days  | l-back-toe__Average_Height | 0          | ID_10 |
| 0days  | l-back-toe__Average_Height | 0.27136664 | ID_11 |
| 0days  | l-back-toe__Average_Height | 0.50930984 | ID_12 |
| 0days  | l-back-toe__Average_Height | 0.33806656 | ID_13 |
| 3days  | l-back-toe__Average_Height | -0.1667614 | ID_1  |
| 3days  | l-back-toe__Average_Height | -0.2929109 | ID_2  |
| 3days  | l-back-toe__Average_Height | -0.2101754 | ID_3  |
| 3days  | l-back-toe__Average_Height | -0.3827026 | ID_4  |
| 3days  | l-back-toe__Average_Height | -0.3570359 | ID_5  |
| 3days  | l-back-toe__Average_Height | -0.1997423 | ID_6  |
| 3days  | l-back-toe__Average_Height | -0.4044975 | ID_7  |
| 3days  | l-back-toe__Average_Height | -0.1764409 | ID_8  |
| 7days  | l-back-toe__Average_Height | -0.3629967 | ID_1  |
| 7days  | l-back-toe__Average_Height | -0.3695886 | ID_2  |
| 7days  | l-back-toe__Average_Height | -0.149925  | ID_3  |
| 7days  | l-back-toe__Average_Height | -0.2441127 | ID_4  |
| 7days  | l-back-toe__Average_Height | -0.1580983 | ID_5  |
| 7days  | l-back-toe__Average_Height | -0.0772535 | ID_6  |
| 7days  | l-back-toe__Average_Height | -0.2933143 | ID_7  |
| 7days  | l-back-toe__Average_Height | -0.1037771 | ID_8  |
| 7days  | l-back-toe__Average_Height | -0.18197   | ID_9  |
| 14days | l-back-toe__Average_Height | -0.1052261 | ID_1  |
| 14days | l-back-toe__Average_Height | -0.0422381 | ID_2  |
| 14days | l-back-toe__Average_Height | -0.2627759 | ID_3  |
| 14days | l-back-toe__Average_Height | -0.2959257 | ID_4  |
| 14days | l-back-toe__Average_Height | -0.4000789 | ID_5  |
| 14days | l-back-toe__Average_Height | -0.2026806 | ID_6  |
| 14days | l-back-toe__Average_Height | -0.1521897 | ID_7  |
| 14days | l-back-toe__Average_Height | -0.0435699 | ID_8  |
| 14days | l-back-toe__Average_Height | -0.2636383 | ID_9  |
| 14days | l-back-toe__Average_Height | -0.1224169 | ID_10 |
| 14days | l-back-toe__Average_Height | 0.21770285 | ID_11 |
| 21days | l-back-toe__Average_Height | -0.0608787 | ID_1  |
| 21days | l-back-toe__Average_Height | 0.27231807 | ID_2  |
| 21days | l-back-toe__Average_Height | -0.0697866 | ID_3  |
| 21days | l-back-toe__Average_Height | -0.0390446 | ID_4  |
| 21days | l-back-toe__Average_Height | -0.0497526 | ID_5  |
| 21days | l-back-toe__Average_Height | -0.1145241 | ID_6  |
| 21days | l-back-toe__Average_Height | -0.1393812 | ID_7  |
| 21days | l-back-toe__Average_Height | -0.1410475 | ID_8  |
| 21days | l-back-toe__Average_Height | 0.13321495 | ID_9  |
| 21days | l-back-toe__Average_Height | 0.31476302 | ID_10 |
| 0days  | l-back-toe__Movement       | -0.891783  | ID_1  |
| 0days  | l-back-toe__Movement       | -0.912764  | ID_2  |
| 0days  | l-back-toe__Movement       | -0.6658001 | ID_3  |
| 0days  | l-back-toe__Movement       | 1.48389972 | ID_4  |
| 0days  | l-back-toe__Movement       | 1.2754539  | ID_5  |
| 0days  | l-back-toe__Movement       | 0          | ID_6  |
| 0days  | l-back-toe__Movement       | 0.19085782 | ID_7  |
| 0days  | l-back-toe__Movement       | -2.7356388 | ID_8  |
| 0days  | l-back-toe__Movement       | -0.6101814 | ID_9  |
| 0days  | l-back-toe__Movement       | -0.934677  | ID_10 |
| 0days  | l-back-toe__Movement       | 0.57495879 | ID_11 |
| 0days  | l-back-toe__Movement       | 0.70774739 | ID_12 |
| 0days  | l-back-toe__Movement       | 0.51821809 | ID_13 |

|        |                          |            |       |
|--------|--------------------------|------------|-------|
| 3days  | l-back-toe__ Movement    | -1.3070101 | ID_1  |
| 3days  | l-back-toe__ Movement    | -0.950261  | ID_2  |
| 3days  | l-back-toe__ Movement    | -1.375857  | ID_3  |
| 3days  | l-back-toe__ Movement    | -1.0712494 | ID_4  |
| 3days  | l-back-toe__ Movement    | -1.4527488 | ID_5  |
| 3days  | l-back-toe__ Movement    | -0.7754522 | ID_6  |
| 3days  | l-back-toe__ Movement    | -1.0120016 | ID_7  |
| 3days  | l-back-toe__ Movement    | -1.684607  | ID_8  |
| 7days  | l-back-toe__ Movement    | -0.9393896 | ID_1  |
| 7days  | l-back-toe__ Movement    | -1.9767143 | ID_2  |
| 7days  | l-back-toe__ Movement    | -0.5922708 | ID_3  |
| 7days  | l-back-toe__ Movement    | -1.1917231 | ID_4  |
| 7days  | l-back-toe__ Movement    | -1.3039235 | ID_5  |
| 7days  | l-back-toe__ Movement    | -0.5461987 | ID_6  |
| 7days  | l-back-toe__ Movement    | -1.1634658 | ID_7  |
| 7days  | l-back-toe__ Movement    | -1.44731   | ID_8  |
| 7days  | l-back-toe__ Movement    | -1.3614519 | ID_9  |
| 14days | l-back-toe__ Movement    | 0.41138077 | ID_1  |
| 14days | l-back-toe__ Movement    | 0.33586402 | ID_2  |
| 14days | l-back-toe__ Movement    | -1.4108377 | ID_3  |
| 14days | l-back-toe__ Movement    | -1.6355577 | ID_4  |
| 14days | l-back-toe__ Movement    | -1.5974239 | ID_5  |
| 14days | l-back-toe__ Movement    | -0.0730451 | ID_6  |
| 14days | l-back-toe__ Movement    | -0.7894132 | ID_7  |
| 14days | l-back-toe__ Movement    | -1.0419263 | ID_8  |
| 14days | l-back-toe__ Movement    | -2.0363561 | ID_9  |
| 14days | l-back-toe__ Movement    | -0.8431799 | ID_10 |
| 14days | l-back-toe__ Movement    | -0.2961896 | ID_11 |
| 21days | l-back-toe__ Movement    | -0.7334589 | ID_1  |
| 21days | l-back-toe__ Movement    | 0.16867439 | ID_2  |
| 21days | l-back-toe__ Movement    | -0.3295037 | ID_3  |
| 21days | l-back-toe__ Movement    | -1.3069666 | ID_4  |
| 21days | l-back-toe__ Movement    | -0.4545942 | ID_5  |
| 21days | l-back-toe__ Movement    | -1.5645656 | ID_6  |
| 21days | l-back-toe__ Movement    | -1.7102679 | ID_7  |
| 21days | l-back-toe__ Movement    | -1.3163913 | ID_8  |
| 21days | l-back-toe__ Movement    | -0.2712721 | ID_9  |
| 21days | l-back-toe__ Movement    | -0.007773  | ID_10 |
| 0days  | l-elbow__ Average_Height | -0.2393984 | ID_1  |
| 0days  | l-elbow__ Average_Height | -0.0606596 | ID_2  |
| 0days  | l-elbow__ Average_Height | 0.05889582 | ID_3  |
| 0days  | l-elbow__ Average_Height | 0.05348408 | ID_4  |
| 0days  | l-elbow__ Average_Height | -0.2840598 | ID_5  |
| 0days  | l-elbow__ Average_Height | 0.08663327 | ID_6  |
| 0days  | l-elbow__ Average_Height | 0.86839951 | ID_7  |
| 0days  | l-elbow__ Average_Height | 0.13338148 | ID_8  |
| 0days  | l-elbow__ Average_Height | 0.10046729 | ID_9  |
| 0days  | l-elbow__ Average_Height | -0.2225656 | ID_10 |
| 0days  | l-elbow__ Average_Height | -0.2256471 | ID_11 |
| 0days  | l-elbow__ Average_Height | -0.1043292 | ID_12 |
| 0days  | l-elbow__ Average_Height | 0          | ID_13 |
| 3days  | l-elbow__ Average_Height | -0.0945403 | ID_1  |
| 3days  | l-elbow__ Average_Height | -0.2066039 | ID_2  |
| 3days  | l-elbow__ Average_Height | -0.3239991 | ID_3  |
| 3days  | l-elbow__ Average_Height | -0.2082555 | ID_4  |
| 3days  | l-elbow__ Average_Height | -0.0155349 | ID_5  |

|        |                         |            |       |
|--------|-------------------------|------------|-------|
| 3days  | l-elbow__Average_Height | -0.2428056 | ID_6  |
| 3days  | l-elbow__Average_Height | -0.1569429 | ID_7  |
| 3days  | l-elbow__Average_Height | -0.0066386 | ID_8  |
| 7days  | l-elbow__Average_Height | 0.16589829 | ID_1  |
| 7days  | l-elbow__Average_Height | -0.0325917 | ID_2  |
| 7days  | l-elbow__Average_Height | -0.2381256 | ID_3  |
| 7days  | l-elbow__Average_Height | -0.1196973 | ID_4  |
| 7days  | l-elbow__Average_Height | -0.3797344 | ID_5  |
| 7days  | l-elbow__Average_Height | 0.06673845 | ID_6  |
| 7days  | l-elbow__Average_Height | 0.16629383 | ID_7  |
| 7days  | l-elbow__Average_Height | -0.1595892 | ID_8  |
| 7days  | l-elbow__Average_Height | -0.2987942 | ID_9  |
| 14days | l-elbow__Average_Height | -0.1311944 | ID_1  |
| 14days | l-elbow__Average_Height | -0.2710208 | ID_2  |
| 14days | l-elbow__Average_Height | 0.21045108 | ID_3  |
| 14days | l-elbow__Average_Height | 0.51704939 | ID_4  |
| 14days | l-elbow__Average_Height | 0.33233005 | ID_5  |
| 14days | l-elbow__Average_Height | -0.1913757 | ID_6  |
| 14days | l-elbow__Average_Height | 0.7371687  | ID_7  |
| 14days | l-elbow__Average_Height | 0.51850075 | ID_8  |
| 14days | l-elbow__Average_Height | -0.1202261 | ID_9  |
| 14days | l-elbow__Average_Height | 0.17608252 | ID_10 |
| 14days | l-elbow__Average_Height | 0.14184654 | ID_11 |
| 21days | l-elbow__Average_Height | -0.22229   | ID_1  |
| 21days | l-elbow__Average_Height | -0.2523522 | ID_2  |
| 21days | l-elbow__Average_Height | 0.00876878 | ID_3  |
| 21days | l-elbow__Average_Height | 0.97198922 | ID_4  |
| 21days | l-elbow__Average_Height | 0.45282924 | ID_5  |
| 21days | l-elbow__Average_Height | 0.12554679 | ID_6  |
| 21days | l-elbow__Average_Height | 0.63911243 | ID_7  |
| 21days | l-elbow__Average_Height | 0.5608876  | ID_8  |
| 21days | l-elbow__Average_Height | 0.18487568 | ID_9  |
| 0days  | l-elbow__Movement       | -0.3591778 | ID_1  |
| 0days  | l-elbow__Movement       | -0.1485998 | ID_2  |
| 0days  | l-elbow__Movement       | -0.250601  | ID_3  |
| 0days  | l-elbow__Movement       | 0.06269647 | ID_4  |
| 0days  | l-elbow__Movement       | -0.5882387 | ID_5  |
| 0days  | l-elbow__Movement       | 0.36670743 | ID_6  |
| 0days  | l-elbow__Movement       | 1.46395694 | ID_7  |
| 0days  | l-elbow__Movement       | 0.72611005 | ID_8  |
| 0days  | l-elbow__Movement       | 0.07244689 | ID_9  |
| 0days  | l-elbow__Movement       | 0          | ID_10 |
| 0days  | l-elbow__Movement       | -0.6767126 | ID_11 |
| 0days  | l-elbow__Movement       | -0.2700936 | ID_12 |
| 0days  | l-elbow__Movement       | 0.06863677 | ID_13 |
| 3days  | l-elbow__Movement       | -0.4701718 | ID_1  |
| 3days  | l-elbow__Movement       | -0.869143  | ID_2  |
| 3days  | l-elbow__Movement       | -0.874188  | ID_3  |
| 3days  | l-elbow__Movement       | -0.5699819 | ID_4  |
| 3days  | l-elbow__Movement       | -0.4102257 | ID_5  |
| 3days  | l-elbow__Movement       | -0.7628235 | ID_6  |
| 3days  | l-elbow__Movement       | -0.8789411 | ID_7  |
| 3days  | l-elbow__Movement       | -0.3000482 | ID_8  |
| 7days  | l-elbow__Movement       | -0.110808  | ID_1  |
| 7days  | l-elbow__Movement       | 0.02819215 | ID_2  |
| 7days  | l-elbow__Movement       | -0.8159358 | ID_3  |

|        |                               |            |       |
|--------|-------------------------------|------------|-------|
| 7days  | l-elbow__ Movement            | -0.2017046 | ID_4  |
| 7days  | l-elbow__ Movement            | -0.8158182 | ID_5  |
| 7days  | l-elbow__ Movement            | 1.26708913 | ID_6  |
| 7days  | l-elbow__ Movement            | 0.06676947 | ID_7  |
| 7days  | l-elbow__ Movement            | -0.5380342 | ID_8  |
| 7days  | l-elbow__ Movement            | -0.5854277 | ID_9  |
| 14days | l-elbow__ Movement            | -0.3594977 | ID_1  |
| 14days | l-elbow__ Movement            | -0.5746941 | ID_2  |
| 14days | l-elbow__ Movement            | 0.70404172 | ID_3  |
| 14days | l-elbow__ Movement            | 1.48744661 | ID_4  |
| 14days | l-elbow__ Movement            | 0.74460189 | ID_5  |
| 14days | l-elbow__ Movement            | -0.4975155 | ID_6  |
| 14days | l-elbow__ Movement            | 1.19959825 | ID_7  |
| 14days | l-elbow__ Movement            | 0.91943454 | ID_8  |
| 14days | l-elbow__ Movement            | -0.4305603 | ID_9  |
| 14days | l-elbow__ Movement            | 0.77137131 | ID_10 |
| 14days | l-elbow__ Movement            | 0.12683158 | ID_11 |
| 21days | l-elbow__ Movement            | -0.4734081 | ID_1  |
| 21days | l-elbow__ Movement            | -0.2018055 | ID_2  |
| 21days | l-elbow__ Movement            | -0.4027433 | ID_3  |
| 21days | l-elbow__ Movement            | 2.29973789 | ID_4  |
| 21days | l-elbow__ Movement            | 0.62506938 | ID_5  |
| 21days | l-elbow__ Movement            | 0.26455313 | ID_6  |
| 21days | l-elbow__ Movement            | 1.56354487 | ID_7  |
| 21days | l-elbow__ Movement            | 1.2242387  | ID_8  |
| 21days | l-elbow__ Movement            | 0.02430408 | ID_9  |
| 0days  | l-front-toe-tip__ Average_Hei | -0.0147911 | ID_1  |
| 0days  | l-front-toe-tip__ Average_Hei | -0.4672062 | ID_2  |
| 0days  | l-front-toe-tip__ Average_Hei | 0.13754486 | ID_3  |
| 0days  | l-front-toe-tip__ Average_Hei | -0.2127102 | ID_4  |
| 0days  | l-front-toe-tip__ Average_Hei | -0.2197684 | ID_5  |
| 0days  | l-front-toe-tip__ Average_Hei | 0.11758264 | ID_6  |
| 0days  | l-front-toe-tip__ Average_Hei | 0.09879332 | ID_7  |
| 0days  | l-front-toe-tip__ Average_Hei | 0.01056145 | ID_8  |
| 0days  | l-front-toe-tip__ Average_Hei | -0.0771106 | ID_9  |
| 0days  | l-front-toe-tip__ Average_Hei | 0          | ID_10 |
| 0days  | l-front-toe-tip__ Average_Hei | -0.3761377 | ID_11 |
| 0days  | l-front-toe-tip__ Average_Hei | 0.15583334 | ID_12 |
| 0days  | l-front-toe-tip__ Average_Hei | 0.2226021  | ID_13 |
| 3days  | l-front-toe-tip__ Average_Hei | -0.5414452 | ID_1  |
| 3days  | l-front-toe-tip__ Average_Hei | -0.3469393 | ID_2  |
| 3days  | l-front-toe-tip__ Average_Hei | -0.188103  | ID_3  |
| 3days  | l-front-toe-tip__ Average_Hei | -0.6663616 | ID_4  |
| 3days  | l-front-toe-tip__ Average_Hei | -0.5568749 | ID_5  |
| 3days  | l-front-toe-tip__ Average_Hei | -0.3228904 | ID_6  |
| 3days  | l-front-toe-tip__ Average_Hei | -0.5251257 | ID_7  |
| 3days  | l-front-toe-tip__ Average_Hei | -0.4537633 | ID_8  |
| 7days  | l-front-toe-tip__ Average_Hei | -0.3615072 | ID_1  |
| 7days  | l-front-toe-tip__ Average_Hei | -0.4075054 | ID_2  |
| 7days  | l-front-toe-tip__ Average_Hei | -0.3830309 | ID_3  |
| 7days  | l-front-toe-tip__ Average_Hei | -0.3858967 | ID_4  |
| 7days  | l-front-toe-tip__ Average_Hei | -0.269788  | ID_5  |
| 7days  | l-front-toe-tip__ Average_Hei | -0.4060665 | ID_6  |
| 7days  | l-front-toe-tip__ Average_Hei | -0.4506956 | ID_7  |
| 7days  | l-front-toe-tip__ Average_Hei | -0.2462014 | ID_8  |
| 7days  | l-front-toe-tip__ Average_Hei | -0.3652331 | ID_9  |

|        |                              |            |       |
|--------|------------------------------|------------|-------|
| 14days | l-front-toe-tip__Average_Hei | -0.2869397 | ID_1  |
| 14days | l-front-toe-tip__Average_Hei | -0.0884651 | ID_2  |
| 14days | l-front-toe-tip__Average_Hei | -0.4246284 | ID_3  |
| 14days | l-front-toe-tip__Average_Hei | -0.4654027 | ID_4  |
| 14days | l-front-toe-tip__Average_Hei | 0.13222713 | ID_5  |
| 14days | l-front-toe-tip__Average_Hei | -0.646435  | ID_6  |
| 14days | l-front-toe-tip__Average_Hei | -0.2675328 | ID_7  |
| 14days | l-front-toe-tip__Average_Hei | -0.2986062 | ID_8  |
| 14days | l-front-toe-tip__Average_Hei | -0.7209941 | ID_9  |
| 14days | l-front-toe-tip__Average_Hei | -0.4827357 | ID_10 |
| 14days | l-front-toe-tip__Average_Hei | 0.03143259 | ID_11 |
| 21days | l-front-toe-tip__Average_Hei | -0.3688372 | ID_1  |
| 21days | l-front-toe-tip__Average_Hei | 0.21574139 | ID_2  |
| 21days | l-front-toe-tip__Average_Hei | -0.0419055 | ID_3  |
| 21days | l-front-toe-tip__Average_Hei | 0.1045365  | ID_4  |
| 21days | l-front-toe-tip__Average_Hei | -0.0544842 | ID_5  |
| 21days | l-front-toe-tip__Average_Hei | -0.5595758 | ID_6  |
| 21days | l-front-toe-tip__Average_Hei | 0.09082528 | ID_7  |
| 21days | l-front-toe-tip__Average_Hei | -0.4457039 | ID_8  |
| 21days | l-front-toe-tip__Average_Hei | -0.3679859 | ID_9  |
| 21days | l-front-toe-tip__Average_Hei | -0.1242323 | ID_10 |
| 0days  | l-front-toe-tip__Movement    | -0.1104458 | ID_1  |
| 0days  | l-front-toe-tip__Movement    | -0.4465396 | ID_2  |
| 0days  | l-front-toe-tip__Movement    | 0.23189562 | ID_3  |
| 0days  | l-front-toe-tip__Movement    | 0.5418076  | ID_4  |
| 0days  | l-front-toe-tip__Movement    | -0.2357491 | ID_5  |
| 0days  | l-front-toe-tip__Movement    | 0.34702465 | ID_6  |
| 0days  | l-front-toe-tip__Movement    | 0.57335941 | ID_7  |
| 0days  | l-front-toe-tip__Movement    | 2.08940108 | ID_8  |
| 0days  | l-front-toe-tip__Movement    | 0          | ID_9  |
| 0days  | l-front-toe-tip__Movement    | -0.5582958 | ID_10 |
| 0days  | l-front-toe-tip__Movement    | -0.3919764 | ID_11 |
| 0days  | l-front-toe-tip__Movement    | -0.1937157 | ID_12 |
| 0days  | l-front-toe-tip__Movement    | 0.3474683  | ID_13 |
| 3days  | l-front-toe-tip__Movement    | -1.0127956 | ID_1  |
| 3days  | l-front-toe-tip__Movement    | -0.5421167 | ID_2  |
| 3days  | l-front-toe-tip__Movement    | -0.177845  | ID_3  |
| 3days  | l-front-toe-tip__Movement    | -0.7988863 | ID_4  |
| 3days  | l-front-toe-tip__Movement    | -0.7890427 | ID_5  |
| 3days  | l-front-toe-tip__Movement    | -0.3779705 | ID_6  |
| 3days  | l-front-toe-tip__Movement    | -0.7549858 | ID_7  |
| 3days  | l-front-toe-tip__Movement    | -1.1554824 | ID_8  |
| 7days  | l-front-toe-tip__Movement    | -0.6854878 | ID_1  |
| 7days  | l-front-toe-tip__Movement    | -0.6253576 | ID_2  |
| 7days  | l-front-toe-tip__Movement    | -0.5864964 | ID_3  |
| 7days  | l-front-toe-tip__Movement    | -0.7229588 | ID_4  |
| 7days  | l-front-toe-tip__Movement    | -0.8602315 | ID_5  |
| 7days  | l-front-toe-tip__Movement    | -0.6352478 | ID_6  |
| 7days  | l-front-toe-tip__Movement    | -0.9297532 | ID_7  |
| 7days  | l-front-toe-tip__Movement    | -0.7220486 | ID_8  |
| 7days  | l-front-toe-tip__Movement    | -1.0779973 | ID_9  |
| 14days | l-front-toe-tip__Movement    | -0.4652339 | ID_1  |
| 14days | l-front-toe-tip__Movement    | -0.419892  | ID_2  |
| 14days | l-front-toe-tip__Movement    | -0.4886277 | ID_3  |
| 14days | l-front-toe-tip__Movement    | -0.4357413 | ID_4  |
| 14days | l-front-toe-tip__Movement    | 0.58281312 | ID_5  |



|        |                           |            |       |
|--------|---------------------------|------------|-------|
| 14days | l-front-toe-tip__Movement | -0.927662  | ID_6  |
| 14days | l-front-toe-tip__Movement | 0.16564881 | ID_7  |
| 14days | l-front-toe-tip__Movement | -0.1091076 | ID_8  |
| 14days | l-front-toe-tip__Movement | -1.4602212 | ID_9  |
| 14days | l-front-toe-tip__Movement | -0.0918883 | ID_10 |
| 14days | l-front-toe-tip__Movement | 0.38813104 | ID_11 |
| 21days | l-front-toe-tip__Movement | -0.1569518 | ID_1  |
| 21days | l-front-toe-tip__Movement | -0.1643208 | ID_2  |
| 21days | l-front-toe-tip__Movement | 0.27387035 | ID_3  |
| 21days | l-front-toe-tip__Movement | 0.71802332 | ID_4  |
| 21days | l-front-toe-tip__Movement | -0.2800393 | ID_5  |
| 21days | l-front-toe-tip__Movement | -1.1417461 | ID_6  |
| 21days | l-front-toe-tip__Movement | 0.08672806 | ID_7  |
| 21days | l-front-toe-tip__Movement | 0.04293131 | ID_8  |
| 21days | l-front-toe-tip__Movement | -1.1301173 | ID_9  |
| 21days | l-front-toe-tip__Movement | -0.2582717 | ID_10 |
| 0days  | l-head__Average_Height    | -0.0399667 | ID_1  |
| 0days  | l-head__Average_Height    | 0.44070507 | ID_2  |
| 0days  | l-head__Average_Height    | 1.04710834 | ID_3  |
| 0days  | l-head__Average_Height    | 1.78224115 | ID_4  |
| 0days  | l-head__Average_Height    | 0.87841401 | ID_5  |
| 0days  | l-head__Average_Height    | -0.2647838 | ID_6  |
| 0days  | l-head__Average_Height    | 0.03996673 | ID_7  |
| 0days  | l-head__Average_Height    | 0.52762914 | ID_8  |
| 0days  | l-head__Average_Height    | -0.6174724 | ID_9  |
| 0days  | l-head__Average_Height    | -0.1490404 | ID_10 |
| 0days  | l-head__Average_Height    | -0.1169046 | ID_11 |
| 0days  | l-head__Average_Height    | -0.3830891 | ID_12 |
| 3days  | l-head__Average_Height    | -0.6172452 | ID_1  |
| 3days  | l-head__Average_Height    | -0.7234231 | ID_2  |
| 3days  | l-head__Average_Height    | -0.6205401 | ID_3  |
| 3days  | l-head__Average_Height    | -0.4518147 | ID_4  |
| 3days  | l-head__Average_Height    | -0.7060306 | ID_5  |
| 3days  | l-head__Average_Height    | -0.3735361 | ID_6  |
| 3days  | l-head__Average_Height    | -0.9765378 | ID_7  |
| 3days  | l-head__Average_Height    | -0.1629469 | ID_8  |
| 7days  | l-head__Average_Height    | 0.81704756 | ID_1  |
| 7days  | l-head__Average_Height    | -0.630912  | ID_2  |
| 7days  | l-head__Average_Height    | -0.8995152 | ID_3  |
| 7days  | l-head__Average_Height    | -1.103179  | ID_4  |
| 7days  | l-head__Average_Height    | -1.1233793 | ID_5  |
| 7days  | l-head__Average_Height    | -0.7840083 | ID_6  |
| 7days  | l-head__Average_Height    | -0.7860921 | ID_7  |
| 7days  | l-head__Average_Height    | -0.4804879 | ID_8  |
| 7days  | l-head__Average_Height    | -0.6033511 | ID_9  |
| 14days | l-head__Average_Height    | 0.1112093  | ID_1  |
| 14days | l-head__Average_Height    | -0.3559697 | ID_2  |
| 14days | l-head__Average_Height    | -0.5079412 | ID_3  |
| 14days | l-head__Average_Height    | 1.54130125 | ID_4  |
| 14days | l-head__Average_Height    | 0.42462363 | ID_5  |
| 14days | l-head__Average_Height    | -0.2031307 | ID_6  |
| 14days | l-head__Average_Height    | -0.6163382 | ID_7  |
| 14days | l-head__Average_Height    | -0.6897253 | ID_8  |
| 14days | l-head__Average_Height    | -0.0913937 | ID_9  |
| 14days | l-head__Average_Height    | 0.23132581 | ID_10 |
| 14days | l-head__Average_Height    | -0.1329957 | ID_11 |

|        |                        |            |       |
|--------|------------------------|------------|-------|
| 21days | l-head__Average_Height | 1.36458986 | ID_1  |
| 21days | l-head__Average_Height | 0.04135524 | ID_2  |
| 21days | l-head__Average_Height | -0.6929751 | ID_3  |
| 21days | l-head__Average_Height | -0.2387244 | ID_4  |
| 21days | l-head__Average_Height | -0.325672  | ID_5  |
| 21days | l-head__Average_Height | -0.579733  | ID_6  |
| 21days | l-head__Average_Height | -0.441725  | ID_7  |
| 21days | l-head__Average_Height | -0.0284937 | ID_8  |
| 21days | l-head__Average_Height | -1.0952739 | ID_9  |
| 21days | l-head__Average_Height | -0.6293497 | ID_10 |
| 0days  | l-head__Movement       | -0.2423463 | ID_1  |
| 0days  | l-head__Movement       | 2.99432841 | ID_2  |
| 0days  | l-head__Movement       | 0.27923577 | ID_3  |
| 0days  | l-head__Movement       | 4.02776935 | ID_4  |
| 0days  | l-head__Movement       | 1.75034694 | ID_5  |
| 0days  | l-head__Movement       | -0.6740571 | ID_6  |
| 0days  | l-head__Movement       | 0.05166077 | ID_7  |
| 0days  | l-head__Movement       | 0.94065384 | ID_8  |
| 0days  | l-head__Movement       | -1.9499972 | ID_9  |
| 0days  | l-head__Movement       | -0.0516608 | ID_10 |
| 0days  | l-head__Movement       | -1.0674218 | ID_11 |
| 0days  | l-head__Movement       | -1.4630043 | ID_12 |
| 3days  | l-head__Movement       | -2.8558414 | ID_1  |
| 3days  | l-head__Movement       | -2.5586508 | ID_2  |
| 3days  | l-head__Movement       | -2.3237033 | ID_3  |
| 3days  | l-head__Movement       | -2.0557824 | ID_4  |
| 3days  | l-head__Movement       | -2.5158933 | ID_5  |
| 3days  | l-head__Movement       | -1.0614751 | ID_6  |
| 3days  | l-head__Movement       | -2.6521061 | ID_7  |
| 3days  | l-head__Movement       | -0.46177   | ID_8  |
| 7days  | l-head__Movement       | 1.62925398 | ID_1  |
| 7days  | l-head__Movement       | -1.5110295 | ID_2  |
| 7days  | l-head__Movement       | -2.673798  | ID_3  |
| 7days  | l-head__Movement       | -2.8680211 | ID_4  |
| 7days  | l-head__Movement       | -3.2296941 | ID_5  |
| 7days  | l-head__Movement       | -1.8488808 | ID_6  |
| 7days  | l-head__Movement       | -2.3014372 | ID_7  |
| 7days  | l-head__Movement       | -2.0484046 | ID_8  |
| 7days  | l-head__Movement       | -1.9557916 | ID_9  |
| 14days | l-head__Movement       | -0.1129699 | ID_1  |
| 14days | l-head__Movement       | -0.9414617 | ID_2  |
| 14days | l-head__Movement       | -2.2444634 | ID_3  |
| 14days | l-head__Movement       | 2.33652881 | ID_4  |
| 14days | l-head__Movement       | 2.5672687  | ID_5  |
| 14days | l-head__Movement       | -1.7412132 | ID_6  |
| 14days | l-head__Movement       | -2.1233444 | ID_7  |
| 14days | l-head__Movement       | -2.1287506 | ID_8  |
| 14days | l-head__Movement       | -0.4323665 | ID_9  |
| 14days | l-head__Movement       | -1.3024088 | ID_10 |
| 14days | l-head__Movement       | -0.9574556 | ID_11 |
| 21days | l-head__Movement       | 2.49882834 | ID_1  |
| 21days | l-head__Movement       | -0.1015888 | ID_2  |
| 21days | l-head__Movement       | -2.488392  | ID_3  |
| 21days | l-head__Movement       | -2.0341705 | ID_4  |
| 21days | l-head__Movement       | -1.1551673 | ID_5  |
| 21days | l-head__Movement       | -2.6573545 | ID_6  |

|        |                       |            |       |
|--------|-----------------------|------------|-------|
| 21days | l-head__Movement      | -1.6932782 | ID_7  |
| 21days | l-head__Movement      | -0.9107645 | ID_8  |
| 21days | l-head__Movement      | -2.940025  | ID_9  |
| 21days | l-head__Movement      | -2.0159836 | ID_10 |
| 0days  | l-hip__Average_Height | -0.44478   | ID_1  |
| 0days  | l-hip__Average_Height | -0.0779021 | ID_2  |
| 0days  | l-hip__Average_Height | 0.22000872 | ID_3  |
| 0days  | l-hip__Average_Height | 0.37772816 | ID_4  |
| 0days  | l-hip__Average_Height | 0.06173439 | ID_5  |
| 0days  | l-hip__Average_Height | 0.28655259 | ID_6  |
| 0days  | l-hip__Average_Height | 0          | ID_7  |
| 0days  | l-hip__Average_Height | 0.28380395 | ID_8  |
| 0days  | l-hip__Average_Height | 0.09884662 | ID_9  |
| 0days  | l-hip__Average_Height | -0.3924345 | ID_10 |
| 0days  | l-hip__Average_Height | -0.2661656 | ID_11 |
| 0days  | l-hip__Average_Height | -0.1642707 | ID_12 |
| 0days  | l-hip__Average_Height | -0.3138523 | ID_13 |
| 3days  | l-hip__Average_Height | -0.4424023 | ID_1  |
| 3days  | l-hip__Average_Height | -0.3450636 | ID_2  |
| 3days  | l-hip__Average_Height | -0.318778  | ID_3  |
| 3days  | l-hip__Average_Height | -0.3109952 | ID_4  |
| 3days  | l-hip__Average_Height | -0.3595845 | ID_5  |
| 3days  | l-hip__Average_Height | -0.4389856 | ID_6  |
| 3days  | l-hip__Average_Height | 0.06458484 | ID_7  |
| 3days  | l-hip__Average_Height | 0.28541868 | ID_8  |
| 7days  | l-hip__Average_Height | -0.5057745 | ID_1  |
| 7days  | l-hip__Average_Height | 0.01702515 | ID_2  |
| 7days  | l-hip__Average_Height | -0.5614886 | ID_3  |
| 7days  | l-hip__Average_Height | -0.2643041 | ID_4  |
| 7days  | l-hip__Average_Height | 0.17797797 | ID_5  |
| 7days  | l-hip__Average_Height | -0.4972085 | ID_6  |
| 7days  | l-hip__Average_Height | -0.1133062 | ID_7  |
| 7days  | l-hip__Average_Height | -0.4577949 | ID_8  |
| 7days  | l-hip__Average_Height | 0.11693554 | ID_9  |
| 14days | l-hip__Average_Height | 0.04016729 | ID_1  |
| 14days | l-hip__Average_Height | -0.1670369 | ID_2  |
| 14days | l-hip__Average_Height | 0.33361269 | ID_3  |
| 14days | l-hip__Average_Height | -0.5270553 | ID_4  |
| 14days | l-hip__Average_Height | -0.4989137 | ID_5  |
| 14days | l-hip__Average_Height | -0.5581158 | ID_6  |
| 14days | l-hip__Average_Height | -0.5762918 | ID_7  |
| 14days | l-hip__Average_Height | -0.739587  | ID_8  |
| 14days | l-hip__Average_Height | 0.21458182 | ID_9  |
| 14days | l-hip__Average_Height | -0.4010188 | ID_10 |
| 14days | l-hip__Average_Height | -0.3005449 | ID_11 |
| 21days | l-hip__Average_Height | -0.1404379 | ID_1  |
| 21days | l-hip__Average_Height | -0.1076918 | ID_2  |
| 21days | l-hip__Average_Height | 0.17621642 | ID_3  |
| 21days | l-hip__Average_Height | -0.3595326 | ID_4  |
| 21days | l-hip__Average_Height | -0.2215566 | ID_5  |
| 21days | l-hip__Average_Height | -0.3710596 | ID_6  |
| 21days | l-hip__Average_Height | 0.26581864 | ID_7  |
| 21days | l-hip__Average_Height | -0.5029991 | ID_8  |
| 21days | l-hip__Average_Height | -0.3125981 | ID_9  |
| 21days | l-hip__Average_Height | 0.17901183 | ID_10 |
| 0days  | l-hip__Movement       | -0.449144  | ID_1  |

|        |                                |            |       |
|--------|--------------------------------|------------|-------|
| 0days  | l-hip__ Movement               | 0.3985917  | ID_2  |
| 0days  | l-hip__ Movement               | 0          | ID_3  |
| 0days  | l-hip__ Movement               | 1.12620366 | ID_4  |
| 0days  | l-hip__ Movement               | -0.1733888 | ID_5  |
| 0days  | l-hip__ Movement               | 1.14533099 | ID_6  |
| 0days  | l-hip__ Movement               | 1.09662952 | ID_7  |
| 0days  | l-hip__ Movement               | 0.53047927 | ID_8  |
| 0days  | l-hip__ Movement               | 0.75835218 | ID_9  |
| 0days  | l-hip__ Movement               | -0.1286163 | ID_10 |
| 0days  | l-hip__ Movement               | -0.1952401 | ID_11 |
| 0days  | l-hip__ Movement               | -0.2297682 | ID_12 |
| 0days  | l-hip__ Movement               | -0.163768  | ID_13 |
| 3days  | l-hip__ Movement               | -1.1155466 | ID_1  |
| 3days  | l-hip__ Movement               | -0.6857796 | ID_2  |
| 3days  | l-hip__ Movement               | -0.4757547 | ID_3  |
| 3days  | l-hip__ Movement               | -0.3524353 | ID_4  |
| 3days  | l-hip__ Movement               | -0.8004561 | ID_5  |
| 3days  | l-hip__ Movement               | -0.4620348 | ID_6  |
| 3days  | l-hip__ Movement               | 0.95327937 | ID_7  |
| 3days  | l-hip__ Movement               | 0.5827101  | ID_8  |
| 7days  | l-hip__ Movement               | -0.5792133 | ID_1  |
| 7days  | l-hip__ Movement               | -0.0686231 | ID_2  |
| 7days  | l-hip__ Movement               | -1.2099425 | ID_3  |
| 7days  | l-hip__ Movement               | -0.577758  | ID_4  |
| 7days  | l-hip__ Movement               | 0.17055567 | ID_5  |
| 7days  | l-hip__ Movement               | -0.4865024 | ID_6  |
| 7days  | l-hip__ Movement               | 0.15170056 | ID_7  |
| 7days  | l-hip__ Movement               | -0.3605221 | ID_8  |
| 7days  | l-hip__ Movement               | 0.36856975 | ID_9  |
| 14days | l-hip__ Movement               | 0.25712958 | ID_1  |
| 14days | l-hip__ Movement               | 0.42699317 | ID_2  |
| 14days | l-hip__ Movement               | -0.0199676 | ID_3  |
| 14days | l-hip__ Movement               | -0.964921  | ID_4  |
| 14days | l-hip__ Movement               | -0.444228  | ID_5  |
| 14days | l-hip__ Movement               | -1.1068478 | ID_6  |
| 14days | l-hip__ Movement               | -0.8293296 | ID_7  |
| 14days | l-hip__ Movement               | -0.6747009 | ID_8  |
| 14days | l-hip__ Movement               | 1.24007211 | ID_9  |
| 14days | l-hip__ Movement               | -0.0778198 | ID_10 |
| 14days | l-hip__ Movement               | 0.20605933 | ID_11 |
| 21days | l-hip__ Movement               | 0.00652735 | ID_1  |
| 21days | l-hip__ Movement               | 0.12645404 | ID_2  |
| 21days | l-hip__ Movement               | -0.126433  | ID_3  |
| 21days | l-hip__ Movement               | -0.6851101 | ID_4  |
| 21days | l-hip__ Movement               | -0.3674863 | ID_5  |
| 21days | l-hip__ Movement               | -0.2466754 | ID_6  |
| 21days | l-hip__ Movement               | 0.46760155 | ID_7  |
| 21days | l-hip__ Movement               | -0.6284351 | ID_8  |
| 21days | l-hip__ Movement               | -0.9116065 | ID_9  |
| 21days | l-hip__ Movement               | 1.08235313 | ID_10 |
| 0days  | l-iliac-crest__ Average Height | -0.3628712 | ID_1  |
| 0days  | l-iliac-crest__ Average Height | 0.13439664 | ID_2  |
| 0days  | l-iliac-crest__ Average Height | 0.38431837 | ID_3  |
| 0days  | l-iliac-crest__ Average Height | 0.57175904 | ID_4  |
| 0days  | l-iliac-crest__ Average Height | -0.3900182 | ID_5  |
| 0days  | l-iliac-crest__ Average Height | 0          | ID_6  |

|        |                               |            |       |
|--------|-------------------------------|------------|-------|
| 0days  | l-iliac-crest__Average_Heigh1 | 0.19718105 | ID_7  |
| 0days  | l-iliac-crest__Average_Heigh1 | -0.136695  | ID_8  |
| 0days  | l-iliac-crest__Average_Heigh1 | 0.23736064 | ID_9  |
| 0days  | l-iliac-crest__Average_Heigh1 | -0.031464  | ID_10 |
| 0days  | l-iliac-crest__Average_Heigh1 | -0.3975253 | ID_11 |
| 0days  | l-iliac-crest__Average_Heigh1 | -0.0896213 | ID_12 |
| 0days  | l-iliac-crest__Average_Heigh1 | 0.08435949 | ID_13 |
| 3days  | l-iliac-crest__Average_Heigh1 | -0.5494283 | ID_1  |
| 3days  | l-iliac-crest__Average_Heigh1 | -0.4668579 | ID_2  |
| 3days  | l-iliac-crest__Average_Heigh1 | -0.2158797 | ID_3  |
| 3days  | l-iliac-crest__Average_Heigh1 | -0.1701912 | ID_4  |
| 3days  | l-iliac-crest__Average_Heigh1 | -0.1780643 | ID_5  |
| 3days  | l-iliac-crest__Average_Heigh1 | -0.1401275 | ID_6  |
| 3days  | l-iliac-crest__Average_Heigh1 | 0.21172895 | ID_7  |
| 3days  | l-iliac-crest__Average_Heigh1 | 0.28233014 | ID_8  |
| 7days  | l-iliac-crest__Average_Heigh1 | -0.3104302 | ID_1  |
| 7days  | l-iliac-crest__Average_Heigh1 | -0.2572337 | ID_2  |
| 7days  | l-iliac-crest__Average_Heigh1 | -0.5490395 | ID_3  |
| 7days  | l-iliac-crest__Average_Heigh1 | -0.4375251 | ID_4  |
| 7days  | l-iliac-crest__Average_Heigh1 | -0.0306272 | ID_5  |
| 7days  | l-iliac-crest__Average_Heigh1 | -0.285001  | ID_6  |
| 7days  | l-iliac-crest__Average_Heigh1 | 0.36952528 | ID_7  |
| 7days  | l-iliac-crest__Average_Heigh1 | 0.00995395 | ID_8  |
| 14days | l-iliac-crest__Average_Heigh1 | -0.2170776 | ID_9  |
| 14days | l-iliac-crest__Average_Heigh1 | 0.00879214 | ID_1  |
| 14days | l-iliac-crest__Average_Heigh1 | -0.4679329 | ID_2  |
| 14days | l-iliac-crest__Average_Heigh1 | -0.5622044 | ID_3  |
| 14days | l-iliac-crest__Average_Heigh1 | -0.442494  | ID_4  |
| 14days | l-iliac-crest__Average_Heigh1 | -0.3832791 | ID_5  |
| 14days | l-iliac-crest__Average_Heigh1 | -0.4039169 | ID_6  |
| 14days | l-iliac-crest__Average_Heigh1 | -0.5298417 | ID_7  |
| 14days | l-iliac-crest__Average_Heigh1 | 0.38699294 | ID_8  |
| 14days | l-iliac-crest__Average_Heigh1 | -0.5183808 | ID_9  |
| 14days | l-iliac-crest__Average_Heigh1 | -0.1409395 | ID_10 |
| 21days | l-iliac-crest__Average_Heigh1 | 0.15711757 | ID_11 |
| 21days | l-iliac-crest__Average_Heigh1 | -0.0382242 | ID_1  |
| 21days | l-iliac-crest__Average_Heigh1 | -0.2682869 | ID_2  |
| 21days | l-iliac-crest__Average_Heigh1 | -0.1676372 | ID_3  |
| 21days | l-iliac-crest__Average_Heigh1 | 0.05191179 | ID_4  |
| 21days | l-iliac-crest__Average_Heigh1 | -0.1616574 | ID_5  |
| 21days | l-iliac-crest__Average_Heigh1 | 0.30549848 | ID_6  |
| 21days | l-iliac-crest__Average_Heigh1 | -0.1079949 | ID_7  |
| 21days | l-iliac-crest__Average_Heigh1 | -0.5673959 | ID_8  |
| 21days | l-iliac-crest__Average_Heigh1 | 0.65186404 | ID_9  |
| 0days  | l-iliac-crest__Movement       | -0.9264023 | ID_10 |
| 0days  | l-iliac-crest__Movement       | -0.2966488 | ID_1  |
| 0days  | l-iliac-crest__Movement       | 0          | ID_2  |
| 0days  | l-iliac-crest__Movement       | 0.96675868 | ID_3  |
| 0days  | l-iliac-crest__Movement       | -0.9852611 | ID_4  |
| 0days  | l-iliac-crest__Movement       | 0.91055    | ID_5  |
| 0days  | l-iliac-crest__Movement       | 0.63231218 | ID_6  |
| 0days  | l-iliac-crest__Movement       | -1.0445128 | ID_7  |
| 0days  | l-iliac-crest__Movement       | 0.80678632 | ID_8  |
| 0days  | l-iliac-crest__Movement       | 0.47001061 | ID_9  |
| 0days  | l-iliac-crest__Movement       | -1.0238567 | ID_10 |
| 0days  | l-iliac-crest__Movement       | -0.3866982 | ID_11 |

|        |                             |            |       |
|--------|-----------------------------|------------|-------|
| 0days  | l-iliac-crest__ Movement    | 0.08397723 | ID_12 |
| 3days  | l-iliac-crest__ Movement    | -1.31425   | ID_13 |
| 3days  | l-iliac-crest__ Movement    | -1.1431332 | ID_1  |
| 3days  | l-iliac-crest__ Movement    | -0.648544  | ID_2  |
| 3days  | l-iliac-crest__ Movement    | -0.4993067 | ID_3  |
| 3days  | l-iliac-crest__ Movement    | -0.8674843 | ID_4  |
| 3days  | l-iliac-crest__ Movement    | -0.7261842 | ID_5  |
| 3days  | l-iliac-crest__ Movement    | 0.81199157 | ID_6  |
| 3days  | l-iliac-crest__ Movement    | 0.47738176 | ID_7  |
| 7days  | l-iliac-crest__ Movement    | -0.3812341 | ID_8  |
| 7days  | l-iliac-crest__ Movement    | -1.2193037 | ID_1  |
| 7days  | l-iliac-crest__ Movement    | -1.261826  | ID_2  |
| 7days  | l-iliac-crest__ Movement    | -0.7895844 | ID_3  |
| 7days  | l-iliac-crest__ Movement    | -0.3242382 | ID_4  |
| 7days  | l-iliac-crest__ Movement    | -0.8407973 | ID_5  |
| 7days  | l-iliac-crest__ Movement    | 0.71135336 | ID_6  |
| 7days  | l-iliac-crest__ Movement    | -0.0333127 | ID_7  |
| 14days | l-iliac-crest__ Movement    | 0.06016784 | ID_8  |
| 14days | l-iliac-crest__ Movement    | 0.36320639 | ID_9  |
| 14days | l-iliac-crest__ Movement    | -1.5307449 | ID_1  |
| 14days | l-iliac-crest__ Movement    | -1.408449  | ID_2  |
| 14days | l-iliac-crest__ Movement    | -1.4738531 | ID_3  |
| 14days | l-iliac-crest__ Movement    | -1.4955974 | ID_4  |
| 14days | l-iliac-crest__ Movement    | -0.5683011 | ID_5  |
| 14days | l-iliac-crest__ Movement    | -0.6846737 | ID_6  |
| 14days | l-iliac-crest__ Movement    | 0.74989581 | ID_7  |
| 14days | l-iliac-crest__ Movement    | -0.8236276 | ID_8  |
| 14days | l-iliac-crest__ Movement    | -0.5397105 | ID_9  |
| 21days | l-iliac-crest__ Movement    | -0.1947859 | ID_10 |
| 21days | l-iliac-crest__ Movement    | -0.2728709 | ID_11 |
| 21days | l-iliac-crest__ Movement    | -0.6709748 | ID_1  |
| 21days | l-iliac-crest__ Movement    | -0.406304  | ID_2  |
| 21days | l-iliac-crest__ Movement    | -0.450563  | ID_3  |
| 21days | l-iliac-crest__ Movement    | -0.9414072 | ID_4  |
| 21days | l-iliac-crest__ Movement    | 0.18955474 | ID_5  |
| 21days | l-iliac-crest__ Movement    | -0.0912889 | ID_6  |
| 21days | l-iliac-crest__ Movement    | -1.4079614 | ID_7  |
| 21days | l-iliac-crest__ Movement    | 0.56774494 | ID_8  |
| 0days  | l-shoulder__ Average_Height | -0.2639678 | ID_1  |
| 0days  | l-shoulder__ Average_Height | -0.2569669 | ID_2  |
| 0days  | l-shoulder__ Average_Height | -0.2782261 | ID_3  |
| 0days  | l-shoulder__ Average_Height | 0.06219628 | ID_4  |
| 0days  | l-shoulder__ Average_Height | 0.33123189 | ID_5  |
| 0days  | l-shoulder__ Average_Height | 0.03136468 | ID_6  |
| 0days  | l-shoulder__ Average_Height | 0.14397045 | ID_7  |
| 0days  | l-shoulder__ Average_Height | 0.92531116 | ID_8  |
| 0days  | l-shoulder__ Average_Height | 0.24068171 | ID_9  |
| 0days  | l-shoulder__ Average_Height | -0.0313647 | ID_10 |
| 0days  | l-shoulder__ Average_Height | -0.227171  | ID_11 |
| 0days  | l-shoulder__ Average_Height | -0.1833853 | ID_12 |
| 3days  | l-shoulder__ Average_Height | -0.3847011 | ID_1  |
| 3days  | l-shoulder__ Average_Height | -0.2549553 | ID_2  |
| 3days  | l-shoulder__ Average_Height | -0.3930354 | ID_3  |
| 3days  | l-shoulder__ Average_Height | -0.1082167 | ID_4  |
| 3days  | l-shoulder__ Average_Height | 0.06229494 | ID_5  |
| 7days  | l-shoulder__ Average_Height | -0.1833509 | ID_1  |

|        |                            |            |       |
|--------|----------------------------|------------|-------|
| 7days  | l-shoulder__Average_Height | -0.2264867 | ID_2  |
| 7days  | l-shoulder__Average_Height | -0.1820852 | ID_3  |
| 7days  | l-shoulder__Average_Height | -0.3811283 | ID_4  |
| 7days  | l-shoulder__Average_Height | -0.3155338 | ID_5  |
| 7days  | l-shoulder__Average_Height | -0.1605345 | ID_6  |
| 7days  | l-shoulder__Average_Height | 0.14939833 | ID_7  |
| 7days  | l-shoulder__Average_Height | -0.2664628 | ID_8  |
| 14days | l-shoulder__Average_Height | -0.0337489 | ID_1  |
| 14days | l-shoulder__Average_Height | -0.3586667 | ID_2  |
| 14days | l-shoulder__Average_Height | 0.02657494 | ID_3  |
| 14days | l-shoulder__Average_Height | 0.22786212 | ID_4  |
| 14days | l-shoulder__Average_Height | 0.00729058 | ID_5  |
| 14days | l-shoulder__Average_Height | -0.0236413 | ID_6  |
| 14days | l-shoulder__Average_Height | 0.11387469 | ID_7  |
| 14days | l-shoulder__Average_Height | 0.18105948 | ID_8  |
| 14days | l-shoulder__Average_Height | 0.2490173  | ID_9  |
| 21days | l-shoulder__Average_Height | -0.2036713 | ID_1  |
| 21days | l-shoulder__Average_Height | -0.2287081 | ID_2  |
| 21days | l-shoulder__Average_Height | -0.0517059 | ID_3  |
| 21days | l-shoulder__Average_Height | 0.17344833 | ID_4  |
| 21days | l-shoulder__Average_Height | -0.2653139 | ID_5  |
| 21days | l-shoulder__Average_Height | -0.177478  | ID_6  |
| 21days | l-shoulder__Average_Height | -0.0956549 | ID_7  |
| 21days | l-shoulder__Average_Height | 0.31921705 | ID_8  |
| 21days | l-shoulder__Average_Height | 0.01745091 | ID_9  |
| 21days | l-shoulder__Average_Height | 0.02632362 | ID_10 |
| 0days  | l-shoulder__Movement       | -0.4993784 | ID_1  |
| 0days  | l-shoulder__Movement       | -0.3641267 | ID_2  |
| 0days  | l-shoulder__Movement       | -0.3023594 | ID_3  |
| 0days  | l-shoulder__Movement       | 0.16173306 | ID_4  |
| 0days  | l-shoulder__Movement       | -0.0467876 | ID_5  |
| 0days  | l-shoulder__Movement       | 0.1527792  | ID_6  |
| 0days  | l-shoulder__Movement       | 0.54277713 | ID_7  |
| 0days  | l-shoulder__Movement       | 2.37741519 | ID_8  |
| 0days  | l-shoulder__Movement       | 0.0526326  | ID_9  |
| 0days  | l-shoulder__Movement       | 0.04678756 | ID_10 |
| 0days  | l-shoulder__Movement       | -0.5659054 | ID_11 |
| 0days  | l-shoulder__Movement       | -0.3075269 | ID_12 |
| 3days  | l-shoulder__Movement       | -0.9211351 | ID_1  |
| 3days  | l-shoulder__Movement       | -0.8850393 | ID_2  |
| 3days  | l-shoulder__Movement       | -0.7711989 | ID_3  |
| 3days  | l-shoulder__Movement       | -0.574643  | ID_4  |
| 3days  | l-shoulder__Movement       | -0.358047  | ID_5  |
| 7days  | l-shoulder__Movement       | -0.8068592 | ID_1  |
| 7days  | l-shoulder__Movement       | -0.8889002 | ID_2  |
| 7days  | l-shoulder__Movement       | -0.690238  | ID_3  |
| 7days  | l-shoulder__Movement       | -0.9319632 | ID_4  |
| 7days  | l-shoulder__Movement       | -0.8581543 | ID_5  |
| 7days  | l-shoulder__Movement       | -0.6503535 | ID_6  |
| 7days  | l-shoulder__Movement       | -0.4490889 | ID_7  |
| 7days  | l-shoulder__Movement       | -0.4100919 | ID_8  |
| 14days | l-shoulder__Movement       | -0.4189732 | ID_1  |
| 14days | l-shoulder__Movement       | -0.908218  | ID_2  |
| 14days | l-shoulder__Movement       | -0.1772168 | ID_3  |
| 14days | l-shoulder__Movement       | 0.10042066 | ID_4  |
| 14days | l-shoulder__Movement       | -0.5304521 | ID_5  |

|        |                              |            |       |
|--------|------------------------------|------------|-------|
| 14days | l-shoulder__ Movement        | -0.3574914 | ID_6  |
| 14days | l-shoulder__ Movement        | -0.1376612 | ID_7  |
| 14days | l-shoulder__ Movement        | 0.0846998  | ID_8  |
| 14days | l-shoulder__ Movement        | 0.50607172 | ID_9  |
| 21days | l-shoulder__ Movement        | -0.2942903 | ID_1  |
| 21days | l-shoulder__ Movement        | -0.4887408 | ID_2  |
| 21days | l-shoulder__ Movement        | -0.6515596 | ID_3  |
| 21days | l-shoulder__ Movement        | -0.2397791 | ID_4  |
| 21days | l-shoulder__ Movement        | -0.7298592 | ID_5  |
| 21days | l-shoulder__ Movement        | -0.7385215 | ID_6  |
| 21days | l-shoulder__ Movement        | -0.3908298 | ID_7  |
| 21days | l-shoulder__ Movement        | 0.04704945 | ID_8  |
| 21days | l-shoulder__ Movement        | -0.5734602 | ID_9  |
| 21days | l-shoulder__ Movement        | -0.251682  | ID_10 |
| 0days  | l-tail-base__ Average_Height | -0.3192629 | ID_1  |
| 0days  | l-tail-base__ Average_Height | 0.06050594 | ID_2  |
| 0days  | l-tail-base__ Average_Height | -0.2867967 | ID_3  |
| 0days  | l-tail-base__ Average_Height | 0.70787679 | ID_4  |
| 0days  | l-tail-base__ Average_Height | -0.3067845 | ID_5  |
| 0days  | l-tail-base__ Average_Height | 0          | ID_6  |
| 0days  | l-tail-base__ Average_Height | 0.02259488 | ID_7  |
| 0days  | l-tail-base__ Average_Height | 0.32524338 | ID_8  |
| 0days  | l-tail-base__ Average_Height | 0.02259161 | ID_9  |
| 0days  | l-tail-base__ Average_Height | -0.3950668 | ID_10 |
| 0days  | l-tail-base__ Average_Height | -0.3294701 | ID_11 |
| 0days  | l-tail-base__ Average_Height | -0.6811874 | ID_12 |
| 0days  | l-tail-base__ Average_Height | 0.21650675 | ID_13 |
| 3days  | l-tail-base__ Average_Height | -0.2851315 | ID_1  |
| 3days  | l-tail-base__ Average_Height | -0.3042199 | ID_2  |
| 3days  | l-tail-base__ Average_Height | -0.324553  | ID_3  |
| 3days  | l-tail-base__ Average_Height | -0.0835919 | ID_4  |
| 3days  | l-tail-base__ Average_Height | 0.11254996 | ID_5  |
| 3days  | l-tail-base__ Average_Height | -0.3287968 | ID_6  |
| 3days  | l-tail-base__ Average_Height | 0.64616202 | ID_7  |
| 3days  | l-tail-base__ Average_Height | 0.98984473 | ID_8  |
| 7days  | l-tail-base__ Average_Height | -0.19543   | ID_1  |
| 7days  | l-tail-base__ Average_Height | -0.2014654 | ID_2  |
| 7days  | l-tail-base__ Average_Height | -0.6513686 | ID_3  |
| 7days  | l-tail-base__ Average_Height | 0.08705057 | ID_4  |
| 7days  | l-tail-base__ Average_Height | -0.5485664 | ID_5  |
| 7days  | l-tail-base__ Average_Height | -0.1128758 | ID_6  |
| 7days  | l-tail-base__ Average_Height | 0.05543214 | ID_7  |
| 7days  | l-tail-base__ Average_Height | -0.4786034 | ID_8  |
| 7days  | l-tail-base__ Average_Height | 0.25057599 | ID_9  |
| 14days | l-tail-base__ Average_Height | 0.60247966 | ID_1  |
| 14days | l-tail-base__ Average_Height | -0.5164752 | ID_2  |
| 14days | l-tail-base__ Average_Height | 1.14574511 | ID_3  |
| 14days | l-tail-base__ Average_Height | -0.339392  | ID_4  |
| 14days | l-tail-base__ Average_Height | -0.1848235 | ID_5  |
| 14days | l-tail-base__ Average_Height | -0.4406353 | ID_6  |
| 14days | l-tail-base__ Average_Height | -0.8135411 | ID_7  |
| 14days | l-tail-base__ Average_Height | -0.535126  | ID_8  |
| 14days | l-tail-base__ Average_Height | 0.96679538 | ID_9  |
| 14days | l-tail-base__ Average_Height | -0.0303554 | ID_10 |
| 14days | l-tail-base__ Average_Height | -0.3294469 | ID_11 |
| 21days | l-tail-base__ Average_Height | 0.04145865 | ID_1  |



|        |                             |            |       |
|--------|-----------------------------|------------|-------|
| 21days | l-tail-base__Average_Height | -0.5190112 | ID_2  |
| 21days | l-tail-base__Average_Height | -0.352422  | ID_3  |
| 21days | l-tail-base__Average_Height | 0.19250263 | ID_4  |
| 21days | l-tail-base__Average_Height | -0.3555155 | ID_5  |
| 21days | l-tail-base__Average_Height | -0.1853749 | ID_6  |
| 21days | l-tail-base__Average_Height | -0.2815834 | ID_7  |
| 21days | l-tail-base__Average_Height | -0.192806  | ID_8  |
| 21days | l-tail-base__Average_Height | -0.6894058 | ID_9  |
| 21days | l-tail-base__Average_Height | -0.1881053 | ID_10 |
| 0days  | l-tail-base__Movement       | -1.4445186 | ID_1  |
| 0days  | l-tail-base__Movement       | 0.82770614 | ID_2  |
| 0days  | l-tail-base__Movement       | -1.3344519 | ID_3  |
| 0days  | l-tail-base__Movement       | 1.09139114 | ID_4  |
| 0days  | l-tail-base__Movement       | -1.266019  | ID_5  |
| 0days  | l-tail-base__Movement       | 0.06382176 | ID_6  |
| 0days  | l-tail-base__Movement       | 0.12528136 | ID_7  |
| 0days  | l-tail-base__Movement       | 0          | ID_8  |
| 0days  | l-tail-base__Movement       | 0.07114391 | ID_9  |
| 0days  | l-tail-base__Movement       | -1.0333938 | ID_10 |
| 0days  | l-tail-base__Movement       | -1.6426021 | ID_11 |
| 0days  | l-tail-base__Movement       | -2.000292  | ID_12 |
| 0days  | l-tail-base__Movement       | 0.45592032 | ID_13 |
| 3days  | l-tail-base__Movement       | -1.3518024 | ID_1  |
| 3days  | l-tail-base__Movement       | -1.026158  | ID_2  |
| 3days  | l-tail-base__Movement       | -1.0562546 | ID_3  |
| 3days  | l-tail-base__Movement       | -0.7828295 | ID_4  |
| 3days  | l-tail-base__Movement       | -0.7770649 | ID_5  |
| 3days  | l-tail-base__Movement       | -0.9997812 | ID_6  |
| 3days  | l-tail-base__Movement       | 0.71321414 | ID_7  |
| 3days  | l-tail-base__Movement       | 1.08829781 | ID_8  |
| 7days  | l-tail-base__Movement       | -1.437235  | ID_1  |
| 7days  | l-tail-base__Movement       | 0.20246082 | ID_2  |
| 7days  | l-tail-base__Movement       | -1.6303672 | ID_3  |
| 7days  | l-tail-base__Movement       | -0.5314102 | ID_4  |
| 7days  | l-tail-base__Movement       | -0.9261191 | ID_5  |
| 7days  | l-tail-base__Movement       | 0.2067443  | ID_6  |
| 7days  | l-tail-base__Movement       | -0.4474122 | ID_7  |
| 7days  | l-tail-base__Movement       | -1.3791844 | ID_8  |
| 7days  | l-tail-base__Movement       | 0.51120546 | ID_9  |
| 14days | l-tail-base__Movement       | 0.77962477 | ID_1  |
| 14days | l-tail-base__Movement       | -0.9008344 | ID_2  |
| 14days | l-tail-base__Movement       | 0.57259416 | ID_3  |
| 14days | l-tail-base__Movement       | -1.7896185 | ID_4  |
| 14days | l-tail-base__Movement       | -1.5304171 | ID_5  |
| 14days | l-tail-base__Movement       | -1.5906238 | ID_6  |
| 14days | l-tail-base__Movement       | -2.0533953 | ID_7  |
| 14days | l-tail-base__Movement       | -1.7541873 | ID_8  |
| 14days | l-tail-base__Movement       | 1.02715145 | ID_9  |
| 14days | l-tail-base__Movement       | -0.063508  | ID_10 |
| 14days | l-tail-base__Movement       | -0.7408715 | ID_11 |
| 21days | l-tail-base__Movement       | -0.5553334 | ID_1  |
| 21days | l-tail-base__Movement       | -1.6746836 | ID_2  |
| 21days | l-tail-base__Movement       | -1.4230839 | ID_3  |
| 21days | l-tail-base__Movement       | -0.7162338 | ID_4  |
| 21days | l-tail-base__Movement       | -1.0745174 | ID_5  |
| 21days | l-tail-base__Movement       | 0.12446746 | ID_6  |

|        |                         |            |       |
|--------|-------------------------|------------|-------|
| 21days | l-tail-base__Movement   | -0.8875311 | ID_7  |
| 21days | l-tail-base__Movement   | -1.0737186 | ID_8  |
| 21days | l-tail-base__Movement   | -1.550028  | ID_9  |
| 21days | l-tail-base__Movement   | -0.6307086 | ID_10 |
| 0days  | l-wrist__Average_Height | 0          | ID_1  |
| 0days  | l-wrist__Average_Height | -0.9168882 | ID_2  |
| 0days  | l-wrist__Average_Height | 0.13156143 | ID_3  |
| 0days  | l-wrist__Average_Height | -0.0089616 | ID_4  |
| 0days  | l-wrist__Average_Height | -0.8736788 | ID_5  |
| 0days  | l-wrist__Average_Height | 0.42761381 | ID_6  |
| 0days  | l-wrist__Average_Height | 0.16573231 | ID_7  |
| 0days  | l-wrist__Average_Height | -0.5073333 | ID_8  |
| 0days  | l-wrist__Average_Height | 0.26751428 | ID_9  |
| 0days  | l-wrist__Average_Height | -0.2163956 | ID_10 |
| 0days  | l-wrist__Average_Height | -0.7771338 | ID_11 |
| 0days  | l-wrist__Average_Height | 0.05496432 | ID_12 |
| 0days  | l-wrist__Average_Height | 0.46029332 | ID_13 |
| 3days  | l-wrist__Average_Height | -1.2033035 | ID_1  |
| 3days  | l-wrist__Average_Height | -0.5027445 | ID_2  |
| 3days  | l-wrist__Average_Height | -0.6602885 | ID_3  |
| 3days  | l-wrist__Average_Height | -1.2235549 | ID_4  |
| 3days  | l-wrist__Average_Height | -1.2686132 | ID_5  |
| 3days  | l-wrist__Average_Height | -0.6346261 | ID_6  |
| 3days  | l-wrist__Average_Height | -0.6605776 | ID_7  |
| 3days  | l-wrist__Average_Height | -0.5429727 | ID_8  |
| 7days  | l-wrist__Average_Height | -0.3656664 | ID_1  |
| 7days  | l-wrist__Average_Height | -0.7288855 | ID_2  |
| 7days  | l-wrist__Average_Height | -0.4997624 | ID_3  |
| 7days  | l-wrist__Average_Height | -0.9261974 | ID_4  |
| 7days  | l-wrist__Average_Height | -0.4650491 | ID_5  |
| 7days  | l-wrist__Average_Height | -0.8274723 | ID_6  |
| 7days  | l-wrist__Average_Height | -1.107149  | ID_7  |
| 7days  | l-wrist__Average_Height | -0.7732756 | ID_8  |
| 7days  | l-wrist__Average_Height | -0.9342893 | ID_9  |
| 14days | l-wrist__Average_Height | -0.3065015 | ID_1  |
| 14days | l-wrist__Average_Height | -0.2901254 | ID_2  |
| 14days | l-wrist__Average_Height | -0.7515281 | ID_3  |
| 14days | l-wrist__Average_Height | -0.8692448 | ID_4  |
| 14days | l-wrist__Average_Height | -0.6732098 | ID_5  |
| 14days | l-wrist__Average_Height | -1.476333  | ID_6  |
| 14days | l-wrist__Average_Height | -0.7906645 | ID_7  |
| 14days | l-wrist__Average_Height | -0.8622238 | ID_8  |
| 14days | l-wrist__Average_Height | -1.4346124 | ID_9  |
| 14days | l-wrist__Average_Height | -1.0778146 | ID_10 |
| 14days | l-wrist__Average_Height | -0.333383  | ID_11 |
| 21days | l-wrist__Average_Height | -0.2890956 | ID_1  |
| 21days | l-wrist__Average_Height | 0.25069776 | ID_2  |
| 21days | l-wrist__Average_Height | -0.0317026 | ID_3  |
| 21days | l-wrist__Average_Height | -0.3461518 | ID_4  |
| 21days | l-wrist__Average_Height | -0.3719616 | ID_5  |
| 21days | l-wrist__Average_Height | -1.134017  | ID_6  |
| 21days | l-wrist__Average_Height | -0.068622  | ID_7  |
| 21days | l-wrist__Average_Height | -0.6158714 | ID_8  |
| 21days | l-wrist__Average_Height | -0.6861222 | ID_9  |
| 21days | l-wrist__Average_Height | -0.2163796 | ID_10 |
| 0days  | l-wrist__Movement       | -0.0668485 | ID_1  |

|        |                             |            |       |
|--------|-----------------------------|------------|-------|
| 0days  | l-wrist__ Movement          | -0.8233552 | ID_2  |
| 0days  | l-wrist__ Movement          | 0.43410383 | ID_3  |
| 0days  | l-wrist__ Movement          | 0.65900356 | ID_4  |
| 0days  | l-wrist__ Movement          | -0.7015359 | ID_5  |
| 0days  | l-wrist__ Movement          | 1.0313634  | ID_6  |
| 0days  | l-wrist__ Movement          | 0          | ID_7  |
| 0days  | l-wrist__ Movement          | -0.7123789 | ID_8  |
| 0days  | l-wrist__ Movement          | 0.36823713 | ID_9  |
| 0days  | l-wrist__ Movement          | -0.3149964 | ID_10 |
| 0days  | l-wrist__ Movement          | -0.2060994 | ID_11 |
| 0days  | l-wrist__ Movement          | 0.29965421 | ID_12 |
| 0days  | l-wrist__ Movement          | 0.32131534 | ID_13 |
| 3days  | l-wrist__ Movement          | -1.5042083 | ID_1  |
| 3days  | l-wrist__ Movement          | -0.5815651 | ID_2  |
| 3days  | l-wrist__ Movement          | -0.5748475 | ID_3  |
| 3days  | l-wrist__ Movement          | -1.5834412 | ID_4  |
| 3days  | l-wrist__ Movement          | -2.1141262 | ID_5  |
| 3days  | l-wrist__ Movement          | -0.5199515 | ID_6  |
| 3days  | l-wrist__ Movement          | -0.7188211 | ID_7  |
| 3days  | l-wrist__ Movement          | -1.0053682 | ID_8  |
| 7days  | l-wrist__ Movement          | -0.040705  | ID_1  |
| 7days  | l-wrist__ Movement          | -1.3582428 | ID_2  |
| 7days  | l-wrist__ Movement          | -0.9271556 | ID_3  |
| 7days  | l-wrist__ Movement          | -1.6903592 | ID_4  |
| 7days  | l-wrist__ Movement          | -0.9693707 | ID_5  |
| 7days  | l-wrist__ Movement          | -0.876172  | ID_6  |
| 7days  | l-wrist__ Movement          | -1.0666631 | ID_7  |
| 7days  | l-wrist__ Movement          | -1.122757  | ID_8  |
| 7days  | l-wrist__ Movement          | -1.4632493 | ID_9  |
| 14days | l-wrist__ Movement          | -0.026349  | ID_1  |
| 14days | l-wrist__ Movement          | -0.5308143 | ID_2  |
| 14days | l-wrist__ Movement          | -1.1437958 | ID_3  |
| 14days | l-wrist__ Movement          | -1.1734528 | ID_4  |
| 14days | l-wrist__ Movement          | -0.6209772 | ID_5  |
| 14days | l-wrist__ Movement          | -1.5635549 | ID_6  |
| 14days | l-wrist__ Movement          | -0.7988941 | ID_7  |
| 14days | l-wrist__ Movement          | -0.8620086 | ID_8  |
| 14days | l-wrist__ Movement          | -0.6140472 | ID_9  |
| 14days | l-wrist__ Movement          | -0.8267626 | ID_10 |
| 14days | l-wrist__ Movement          | 0.43595011 | ID_11 |
| 21days | l-wrist__ Movement          | -0.4633034 | ID_1  |
| 21days | l-wrist__ Movement          | 1.32532468 | ID_2  |
| 21days | l-wrist__ Movement          | 0.48366636 | ID_3  |
| 21days | l-wrist__ Movement          | 0.19644942 | ID_4  |
| 21days | l-wrist__ Movement          | -0.7893995 | ID_5  |
| 21days | l-wrist__ Movement          | -1.0992442 | ID_6  |
| 21days | l-wrist__ Movement          | -0.0645873 | ID_7  |
| 21days | l-wrist__ Movement          | 0.23430611 | ID_8  |
| 21days | l-wrist__ Movement          | -0.832874  | ID_9  |
| 21days | l-wrist__ Movement          | 0.31235869 | ID_10 |
| 0days  | r-back-ankle__ Average_Heig | -0.1468829 | ID_1  |
| 0days  | r-back-ankle__ Average_Heig | -0.0401207 | ID_2  |
| 0days  | r-back-ankle__ Average_Heig | 0.39735087 | ID_3  |
| 0days  | r-back-ankle__ Average_Heig | 0.37653903 | ID_4  |
| 0days  | r-back-ankle__ Average_Heig | 0.96955425 | ID_5  |
| 0days  | r-back-ankle__ Average_Heig | 0          | ID_6  |

|        |              |              |            |       |
|--------|--------------|--------------|------------|-------|
| 0days  | r-back-ankle | Average_Heig | -0.0345592 | ID_7  |
| 0days  | r-back-ankle | Average_Heig | -0.5484057 | ID_8  |
| 0days  | r-back-ankle | Average_Heig | -0.1130645 | ID_9  |
| 0days  | r-back-ankle | Average_Heig | -0.1082404 | ID_10 |
| 0days  | r-back-ankle | Average_Heig | 0.60831657 | ID_11 |
| 0days  | r-back-ankle | Average_Heig | 0.58211529 | ID_12 |
| 0days  | r-back-ankle | Average_Heig | 0.56271777 | ID_13 |
| 3days  | r-back-ankle | Average_Heig | 0.47113181 | ID_1  |
| 3days  | r-back-ankle | Average_Heig | -0.2493458 | ID_2  |
| 3days  | r-back-ankle | Average_Heig | -0.1913517 | ID_3  |
| 3days  | r-back-ankle | Average_Heig | 0.67381952 | ID_4  |
| 3days  | r-back-ankle | Average_Heig | 1.23222732 | ID_5  |
| 3days  | r-back-ankle | Average_Heig | 0.0424854  | ID_6  |
| 3days  | r-back-ankle | Average_Heig | 0.98055707 | ID_7  |
| 3days  | r-back-ankle | Average_Heig | 0.11957431 | ID_8  |
| 7days  | r-back-ankle | Average_Heig | 0.07067285 | ID_1  |
| 7days  | r-back-ankle | Average_Heig | -0.1828693 | ID_2  |
| 7days  | r-back-ankle | Average_Heig | 0.36533421 | ID_3  |
| 7days  | r-back-ankle | Average_Heig | 0.46978811 | ID_4  |
| 7days  | r-back-ankle | Average_Heig | 0.22741484 | ID_5  |
| 7days  | r-back-ankle | Average_Heig | 0.96930615 | ID_6  |
| 7days  | r-back-ankle | Average_Heig | 0.87412391 | ID_7  |
| 7days  | r-back-ankle | Average_Heig | 0.09158385 | ID_8  |
| 7days  | r-back-ankle | Average_Heig | 0.60109886 | ID_9  |
| 14days | r-back-ankle | Average_Heig | -0.1909383 | ID_1  |
| 14days | r-back-ankle | Average_Heig | 0.47264935 | ID_2  |
| 14days | r-back-ankle | Average_Heig | 0.62618015 | ID_3  |
| 14days | r-back-ankle | Average_Heig | 0.70032853 | ID_4  |
| 14days | r-back-ankle | Average_Heig | 0.88070319 | ID_5  |
| 14days | r-back-ankle | Average_Heig | 0.82596298 | ID_6  |
| 14days | r-back-ankle | Average_Heig | 0.96959819 | ID_7  |
| 14days | r-back-ankle | Average_Heig | 0.86704915 | ID_8  |
| 14days | r-back-ankle | Average_Heig | -0.2693921 | ID_9  |
| 14days | r-back-ankle | Average_Heig | 1.01156415 | ID_10 |
| 14days | r-back-ankle | Average_Heig | -0.1367473 | ID_11 |
| 21days | r-back-ankle | Average_Heig | -0.3918919 | ID_1  |
| 21days | r-back-ankle | Average_Heig | 0.53226777 | ID_2  |
| 21days | r-back-ankle | Average_Heig | 0.58103652 | ID_3  |
| 21days | r-back-ankle | Average_Heig | 1.05763863 | ID_4  |
| 21days | r-back-ankle | Average_Heig | 0.31793073 | ID_5  |
| 21days | r-back-ankle | Average_Heig | 0.85203847 | ID_6  |
| 21days | r-back-ankle | Average_Heig | -0.1132625 | ID_7  |
| 21days | r-back-ankle | Average_Heig | 0.22886673 | ID_8  |
| 21days | r-back-ankle | Average_Heig | 0.59331043 | ID_9  |
| 21days | r-back-ankle | Average_Heig | 0.23823543 | ID_10 |
| 0days  | r-back-ankle | Movement     | -0.53666   | ID_1  |
| 0days  | r-back-ankle | Movement     | -0.2437109 | ID_2  |
| 0days  | r-back-ankle | Movement     | 0.12589186 | ID_3  |
| 0days  | r-back-ankle | Movement     | -0.2556339 | ID_4  |
| 0days  | r-back-ankle | Movement     | 0.9582799  | ID_5  |
| 0days  | r-back-ankle | Movement     | 0.72373607 | ID_6  |
| 0days  | r-back-ankle | Movement     | 0.1745796  | ID_7  |
| 0days  | r-back-ankle | Movement     | -1.7483562 | ID_8  |
| 0days  | r-back-ankle | Movement     | -1.2817317 | ID_9  |
| 0days  | r-back-ankle | Movement     | -0.5547742 | ID_10 |
| 0days  | r-back-ankle | Movement     | 0          | ID_11 |

|        |                            |            |       |
|--------|----------------------------|------------|-------|
| 0days  | r-back-ankle__Movement     | 0.78925078 | ID_12 |
| 0days  | r-back-ankle__Movement     | 0.77578419 | ID_13 |
| 3days  | r-back-ankle__Movement     | -0.4562464 | ID_1  |
| 3days  | r-back-ankle__Movement     | -1.2200183 | ID_2  |
| 3days  | r-back-ankle__Movement     | -1.312673  | ID_3  |
| 3days  | r-back-ankle__Movement     | -0.2749098 | ID_4  |
| 3days  | r-back-ankle__Movement     | 1.11911827 | ID_5  |
| 3days  | r-back-ankle__Movement     | -0.2213618 | ID_6  |
| 3days  | r-back-ankle__Movement     | 1.81552971 | ID_7  |
| 3days  | r-back-ankle__Movement     | 0.43921921 | ID_8  |
| 7days  | r-back-ankle__Movement     | -1.0519767 | ID_1  |
| 7days  | r-back-ankle__Movement     | -0.5108035 | ID_2  |
| 7days  | r-back-ankle__Movement     | -0.9018289 | ID_3  |
| 7days  | r-back-ankle__Movement     | 0.0665612  | ID_4  |
| 7days  | r-back-ankle__Movement     | -0.6195518 | ID_5  |
| 7days  | r-back-ankle__Movement     | 2.01364032 | ID_6  |
| 7days  | r-back-ankle__Movement     | 0.83046006 | ID_7  |
| 7days  | r-back-ankle__Movement     | 0.05341691 | ID_8  |
| 7days  | r-back-ankle__Movement     | 0.67465299 | ID_9  |
| 14days | r-back-ankle__Movement     | -1.1212053 | ID_1  |
| 14days | r-back-ankle__Movement     | 0.29950301 | ID_2  |
| 14days | r-back-ankle__Movement     | 0.33130637 | ID_3  |
| 14days | r-back-ankle__Movement     | 1.03161695 | ID_4  |
| 14days | r-back-ankle__Movement     | 1.0908857  | ID_5  |
| 14days | r-back-ankle__Movement     | 0.33265384 | ID_6  |
| 14days | r-back-ankle__Movement     | 1.24265452 | ID_7  |
| 14days | r-back-ankle__Movement     | 1.28354218 | ID_8  |
| 14days | r-back-ankle__Movement     | 0.57465742 | ID_9  |
| 14days | r-back-ankle__Movement     | 3.04106747 | ID_10 |
| 14days | r-back-ankle__Movement     | -0.2951909 | ID_11 |
| 21days | r-back-ankle__Movement     | -1.5107487 | ID_1  |
| 21days | r-back-ankle__Movement     | 0.78949516 | ID_2  |
| 21days | r-back-ankle__Movement     | 0.81447419 | ID_3  |
| 21days | r-back-ankle__Movement     | 1.56851356 | ID_4  |
| 21days | r-back-ankle__Movement     | 0.25379168 | ID_5  |
| 21days | r-back-ankle__Movement     | 1.47900434 | ID_6  |
| 21days | r-back-ankle__Movement     | -1.0127802 | ID_7  |
| 21days | r-back-ankle__Movement     | 0.68665494 | ID_8  |
| 21days | r-back-ankle__Movement     | 0.91334627 | ID_9  |
| 21days | r-back-ankle__Movement     | 0.51075904 | ID_10 |
| 0days  | r-back-toe__Average_Height | 0.16428184 | ID_1  |
| 0days  | r-back-toe__Average_Height | 0.23238301 | ID_2  |
| 0days  | r-back-toe__Average_Height | -0.205038  | ID_3  |
| 0days  | r-back-toe__Average_Height | -0.0667881 | ID_4  |
| 0days  | r-back-toe__Average_Height | -0.2077944 | ID_5  |
| 0days  | r-back-toe__Average_Height | 0          | ID_6  |
| 0days  | r-back-toe__Average_Height | 0.09773425 | ID_7  |
| 0days  | r-back-toe__Average_Height | 0.10768269 | ID_8  |
| 0days  | r-back-toe__Average_Height | 0.02231382 | ID_9  |
| 0days  | r-back-toe__Average_Height | 0.07480318 | ID_10 |
| 0days  | r-back-toe__Average_Height | -0.2910118 | ID_11 |
| 0days  | r-back-toe__Average_Height | -0.0926191 | ID_12 |
| 0days  | r-back-toe__Average_Height | -0.0277035 | ID_13 |
| 3days  | r-back-toe__Average_Height | -0.1705249 | ID_1  |
| 3days  | r-back-toe__Average_Height | -0.2552123 | ID_2  |
| 3days  | r-back-toe__Average_Height | -0.0630304 | ID_3  |

|        |                            |            |       |
|--------|----------------------------|------------|-------|
| 3days  | r-back-toe__Average_Height | -0.2271536 | ID_4  |
| 3days  | r-back-toe__Average_Height | 0.06989828 | ID_5  |
| 3days  | r-back-toe__Average_Height | -0.1739801 | ID_6  |
| 3days  | r-back-toe__Average_Height | 0.1501916  | ID_7  |
| 3days  | r-back-toe__Average_Height | -0.0341578 | ID_8  |
| 7days  | r-back-toe__Average_Height | -0.0422763 | ID_1  |
| 7days  | r-back-toe__Average_Height | -0.0695279 | ID_2  |
| 7days  | r-back-toe__Average_Height | 0.34405031 | ID_3  |
| 7days  | r-back-toe__Average_Height | 0.74579805 | ID_4  |
| 7days  | r-back-toe__Average_Height | -0.037491  | ID_5  |
| 7days  | r-back-toe__Average_Height | 0.41882362 | ID_6  |
| 7days  | r-back-toe__Average_Height | -0.0918367 | ID_7  |
| 7days  | r-back-toe__Average_Height | -0.0923621 | ID_8  |
| 7days  | r-back-toe__Average_Height | -0.2709577 | ID_9  |
| 14days | r-back-toe__Average_Height | -0.2069974 | ID_1  |
| 14days | r-back-toe__Average_Height | -0.132112  | ID_2  |
| 14days | r-back-toe__Average_Height | 0.14321988 | ID_3  |
| 14days | r-back-toe__Average_Height | 0.21929715 | ID_4  |
| 14days | r-back-toe__Average_Height | 0.31739203 | ID_5  |
| 14days | r-back-toe__Average_Height | -0.0223594 | ID_6  |
| 14days | r-back-toe__Average_Height | 0.60258774 | ID_7  |
| 14days | r-back-toe__Average_Height | 0.77690214 | ID_8  |
| 14days | r-back-toe__Average_Height | -0.0537482 | ID_9  |
| 14days | r-back-toe__Average_Height | 0.29723644 | ID_10 |
| 14days | r-back-toe__Average_Height | -0.0556741 | ID_11 |
| 21days | r-back-toe__Average_Height | -0.204243  | ID_1  |
| 21days | r-back-toe__Average_Height | 0.16089253 | ID_2  |
| 21days | r-back-toe__Average_Height | 0.07056671 | ID_3  |
| 21days | r-back-toe__Average_Height | 1.0563191  | ID_4  |
| 21days | r-back-toe__Average_Height | -0.0126671 | ID_5  |
| 21days | r-back-toe__Average_Height | 0.13612435 | ID_6  |
| 21days | r-back-toe__Average_Height | 0.07347411 | ID_7  |
| 21days | r-back-toe__Average_Height | 0.60808882 | ID_8  |
| 21days | r-back-toe__Average_Height | 0.37612957 | ID_9  |
| 21days | r-back-toe__Average_Height | 0.43363305 | ID_10 |
| 0days  | r-back-toe__Movement       | 0.15088302 | ID_1  |
| 0days  | r-back-toe__Movement       | 0.84273158 | ID_2  |
| 0days  | r-back-toe__Movement       | -0.5728224 | ID_3  |
| 0days  | r-back-toe__Movement       | -0.8089688 | ID_4  |
| 0days  | r-back-toe__Movement       | -0.2289414 | ID_5  |
| 0days  | r-back-toe__Movement       | 0.20414094 | ID_6  |
| 0days  | r-back-toe__Movement       | 0.01306226 | ID_7  |
| 0days  | r-back-toe__Movement       | 1.49536378 | ID_8  |
| 0days  | r-back-toe__Movement       | -0.5327173 | ID_9  |
| 0days  | r-back-toe__Movement       | -0.0958501 | ID_10 |
| 0days  | r-back-toe__Movement       | -0.0451249 | ID_11 |
| 0days  | r-back-toe__Movement       | 0.47176219 | ID_12 |
| 0days  | r-back-toe__Movement       | 0          | ID_13 |
| 3days  | r-back-toe__Movement       | -0.413253  | ID_1  |
| 3days  | r-back-toe__Movement       | -0.4418956 | ID_2  |
| 3days  | r-back-toe__Movement       | -0.4449753 | ID_3  |
| 3days  | r-back-toe__Movement       | -0.2852193 | ID_4  |
| 3days  | r-back-toe__Movement       | 0.94427768 | ID_5  |
| 3days  | r-back-toe__Movement       | -0.1405329 | ID_6  |
| 3days  | r-back-toe__Movement       | 1.1655564  | ID_7  |
| 3days  | r-back-toe__Movement       | 0.4619632  | ID_8  |

|        |                         |            |       |
|--------|-------------------------|------------|-------|
| 7days  | r-back-toe__Movement    | 0.64306093 | ID_1  |
| 7days  | r-back-toe__Movement    | 0.88709069 | ID_2  |
| 7days  | r-back-toe__Movement    | 0.57444742 | ID_3  |
| 7days  | r-back-toe__Movement    | 0.76843434 | ID_4  |
| 7days  | r-back-toe__Movement    | -0.1996166 | ID_5  |
| 7days  | r-back-toe__Movement    | 1.23218581 | ID_6  |
| 7days  | r-back-toe__Movement    | 0.31819638 | ID_7  |
| 7days  | r-back-toe__Movement    | -0.2934807 | ID_8  |
| 7days  | r-back-toe__Movement    | -0.1789538 | ID_9  |
| 14days | r-back-toe__Movement    | -0.8820356 | ID_1  |
| 14days | r-back-toe__Movement    | -0.3334188 | ID_2  |
| 14days | r-back-toe__Movement    | 1.73425966 | ID_3  |
| 14days | r-back-toe__Movement    | 0.51693385 | ID_4  |
| 14days | r-back-toe__Movement    | 0.87075354 | ID_5  |
| 14days | r-back-toe__Movement    | -0.1281288 | ID_6  |
| 14days | r-back-toe__Movement    | 1.32247091 | ID_7  |
| 14days | r-back-toe__Movement    | 1.41374384 | ID_8  |
| 14days | r-back-toe__Movement    | 0.04532501 | ID_9  |
| 14days | r-back-toe__Movement    | 1.00426211 | ID_10 |
| 14days | r-back-toe__Movement    | -0.5592575 | ID_11 |
| 21days | r-back-toe__Movement    | -0.1767319 | ID_1  |
| 21days | r-back-toe__Movement    | 0.55448603 | ID_2  |
| 21days | r-back-toe__Movement    | 0.33671286 | ID_3  |
| 21days | r-back-toe__Movement    | 3.09688759 | ID_4  |
| 21days | r-back-toe__Movement    | 0.07650652 | ID_5  |
| 21days | r-back-toe__Movement    | 0.44406029 | ID_6  |
| 21days | r-back-toe__Movement    | -0.0751893 | ID_7  |
| 21days | r-back-toe__Movement    | 0.99516644 | ID_8  |
| 21days | r-back-toe__Movement    | 0.6239984  | ID_9  |
| 21days | r-back-toe__Movement    | 1.74329356 | ID_10 |
| 0days  | r-elbow__Average_Height | 0.00362726 | ID_1  |
| 0days  | r-elbow__Average_Height | -0.4731648 | ID_2  |
| 0days  | r-elbow__Average_Height | 0          | ID_3  |
| 0days  | r-elbow__Average_Height | 0.59821548 | ID_4  |
| 0days  | r-elbow__Average_Height | -0.1795274 | ID_5  |
| 0days  | r-elbow__Average_Height | -0.2091248 | ID_6  |
| 0days  | r-elbow__Average_Height | 0.06555415 | ID_7  |
| 0days  | r-elbow__Average_Height | 0.0028623  | ID_8  |
| 0days  | r-elbow__Average_Height | 0.00705776 | ID_9  |
| 0days  | r-elbow__Average_Height | -0.3061086 | ID_10 |
| 0days  | r-elbow__Average_Height | -0.3496225 | ID_11 |
| 0days  | r-elbow__Average_Height | -0.2138599 | ID_12 |
| 0days  | r-elbow__Average_Height | 0.15087725 | ID_13 |
| 3days  | r-elbow__Average_Height | -0.4602182 | ID_1  |
| 3days  | r-elbow__Average_Height | -0.44453   | ID_2  |
| 3days  | r-elbow__Average_Height | -0.4661707 | ID_3  |
| 3days  | r-elbow__Average_Height | -0.5317932 | ID_4  |
| 3days  | r-elbow__Average_Height | -0.6897216 | ID_5  |
| 3days  | r-elbow__Average_Height | -0.4917161 | ID_6  |
| 3days  | r-elbow__Average_Height | 0.08653793 | ID_7  |
| 3days  | r-elbow__Average_Height | -0.0810403 | ID_8  |
| 7days  | r-elbow__Average_Height | -0.5885457 | ID_1  |
| 7days  | r-elbow__Average_Height | -0.3345832 | ID_2  |
| 7days  | r-elbow__Average_Height | -0.38448   | ID_3  |
| 7days  | r-elbow__Average_Height | -0.0576795 | ID_4  |
| 7days  | r-elbow__Average_Height | -0.0200633 | ID_5  |

|        |                         |            |       |
|--------|-------------------------|------------|-------|
| 7days  | r-elbow__Average_Height | -0.3382561 | ID_6  |
| 7days  | r-elbow__Average_Height | -0.1930686 | ID_7  |
| 7days  | r-elbow__Average_Height | -0.1289549 | ID_8  |
| 7days  | r-elbow__Average_Height | -0.269897  | ID_9  |
| 14days | r-elbow__Average_Height | -0.2779463 | ID_1  |
| 14days | r-elbow__Average_Height | 0.04722786 | ID_2  |
| 14days | r-elbow__Average_Height | -0.4490856 | ID_3  |
| 14days | r-elbow__Average_Height | -0.1542237 | ID_4  |
| 14days | r-elbow__Average_Height | -0.3414627 | ID_5  |
| 14days | r-elbow__Average_Height | -0.3675006 | ID_6  |
| 14days | r-elbow__Average_Height | -0.7401342 | ID_7  |
| 14days | r-elbow__Average_Height | -0.168529  | ID_8  |
| 14days | r-elbow__Average_Height | -0.272153  | ID_9  |
| 14days | r-elbow__Average_Height | -0.2597085 | ID_10 |
| 21days | r-elbow__Average_Height | -0.3408939 | ID_11 |
| 21days | r-elbow__Average_Height | 0.31149782 | ID_1  |
| 21days | r-elbow__Average_Height | -0.2743563 | ID_2  |
| 21days | r-elbow__Average_Height | -0.252446  | ID_3  |
| 21days | r-elbow__Average_Height | 0.06826335 | ID_4  |
| 21days | r-elbow__Average_Height | -0.5913508 | ID_5  |
| 21days | r-elbow__Average_Height | -0.0757413 | ID_6  |
| 21days | r-elbow__Average_Height | 0.08629657 | ID_7  |
| 21days | r-elbow__Average_Height | -0.0771913 | ID_8  |
| 21days | r-elbow__Average_Height | 0.63612734 | ID_9  |
| 0days  | r-elbow__Movement       | -0.1548557 | ID_10 |
| 0days  | r-elbow__Movement       | -0.9641164 | ID_1  |
| 0days  | r-elbow__Movement       | 0.02450275 | ID_2  |
| 0days  | r-elbow__Movement       | 0.57259644 | ID_3  |
| 0days  | r-elbow__Movement       | -0.1796794 | ID_4  |
| 0days  | r-elbow__Movement       | -0.7718495 | ID_5  |
| 0days  | r-elbow__Movement       | 0.36785776 | ID_6  |
| 0days  | r-elbow__Movement       | 0          | ID_7  |
| 0days  | r-elbow__Movement       | 0.37572922 | ID_8  |
| 0days  | r-elbow__Movement       | -1.1822798 | ID_9  |
| 0days  | r-elbow__Movement       | -0.8096325 | ID_10 |
| 0days  | r-elbow__Movement       | 0.11151942 | ID_11 |
| 0days  | r-elbow__Movement       | 0.46812633 | ID_12 |
| 3days  | r-elbow__Movement       | -0.9704    | ID_13 |
| 3days  | r-elbow__Movement       | -1.2574547 | ID_1  |
| 3days  | r-elbow__Movement       | -0.8054357 | ID_2  |
| 3days  | r-elbow__Movement       | -1.0453943 | ID_3  |
| 3days  | r-elbow__Movement       | -1.4619121 | ID_4  |
| 3days  | r-elbow__Movement       | -0.9935279 | ID_5  |
| 3days  | r-elbow__Movement       | -0.1506226 | ID_6  |
| 3days  | r-elbow__Movement       | 0.06173137 | ID_7  |
| 7days  | r-elbow__Movement       | -1.4591558 | ID_8  |
| 7days  | r-elbow__Movement       | -0.7326618 | ID_1  |
| 7days  | r-elbow__Movement       | -1.0562758 | ID_2  |
| 7days  | r-elbow__Movement       | -0.9081111 | ID_3  |
| 7days  | r-elbow__Movement       | -0.7497038 | ID_4  |
| 7days  | r-elbow__Movement       | -0.9367159 | ID_5  |
| 7days  | r-elbow__Movement       | -0.8367696 | ID_6  |
| 7days  | r-elbow__Movement       | -0.9526068 | ID_7  |
| 7days  | r-elbow__Movement       | -0.9394047 | ID_8  |
| 14days | r-elbow__Movement       | -0.6687055 | ID_9  |
| 14days | r-elbow__Movement       | -0.454514  | ID_1  |



|        |                             |            |       |
|--------|-----------------------------|------------|-------|
| 14days | r-elbow__ Movement          | -1.1927558 | ID_2  |
| 14days | r-elbow__ Movement          | -0.4436888 | ID_3  |
| 14days | r-elbow__ Movement          | -0.957033  | ID_4  |
| 14days | r-elbow__ Movement          | -0.7357572 | ID_5  |
| 14days | r-elbow__ Movement          | -1.4834283 | ID_6  |
| 14days | r-elbow__ Movement          | 0.23674366 | ID_7  |
| 14days | r-elbow__ Movement          | -0.7070423 | ID_8  |
| 14days | r-elbow__ Movement          | -0.4223416 | ID_9  |
| 21days | r-elbow__ Movement          | -0.8425795 | ID_10 |
| 21days | r-elbow__ Movement          | 0.29334309 | ID_11 |
| 21days | r-elbow__ Movement          | -0.3426718 | ID_1  |
| 21days | r-elbow__ Movement          | -0.4123859 | ID_2  |
| 21days | r-elbow__ Movement          | -0.5608952 | ID_3  |
| 21days | r-elbow__ Movement          | -1.4820006 | ID_4  |
| 21days | r-elbow__ Movement          | -0.465817  | ID_5  |
| 21days | r-elbow__ Movement          | -0.3569001 | ID_6  |
| 21days | r-elbow__ Movement          | -0.7083302 | ID_7  |
| 21days | r-elbow__ Movement          | 1.64210311 | ID_8  |
| 0days  | r-front-toe-tip Average Hei | 0.03135791 | ID_1  |
| 0days  | r-front-toe-tip Average Hei | 0.18709357 | ID_2  |
| 0days  | r-front-toe-tip Average Hei | 0.1476945  | ID_3  |
| 0days  | r-front-toe-tip Average Hei | -0.001675  | ID_4  |
| 0days  | r-front-toe-tip Average Hei | -0.1703256 | ID_5  |
| 0days  | r-front-toe-tip Average Hei | 0.00514434 | ID_6  |
| 0days  | r-front-toe-tip Average Hei | 0          | ID_7  |
| 0days  | r-front-toe-tip Average Hei | 0.57169011 | ID_8  |
| 0days  | r-front-toe-tip Average Hei | -0.0052955 | ID_9  |
| 0days  | r-front-toe-tip Average Hei | -0.2480867 | ID_10 |
| 0days  | r-front-toe-tip Average Hei | -0.1338386 | ID_11 |
| 0days  | r-front-toe-tip Average Hei | -0.1716836 | ID_12 |
| 0days  | r-front-toe-tip Average Hei | 0.20355628 | ID_13 |
| 3days  | r-front-toe-tip Average Hei | -0.2158472 | ID_1  |
| 3days  | r-front-toe-tip Average Hei | -0.3191591 | ID_2  |
| 3days  | r-front-toe-tip Average Hei | -0.0324925 | ID_3  |
| 3days  | r-front-toe-tip Average Hei | -0.2357843 | ID_4  |
| 3days  | r-front-toe-tip Average Hei | -0.1801322 | ID_5  |
| 3days  | r-front-toe-tip Average Hei | -0.3621174 | ID_6  |
| 3days  | r-front-toe-tip Average Hei | -0.3246147 | ID_7  |
| 3days  | r-front-toe-tip Average Hei | 0.12807963 | ID_8  |
| 7days  | r-front-toe-tip Average Hei | -0.0384315 | ID_1  |
| 7days  | r-front-toe-tip Average Hei | 0.40600335 | ID_2  |
| 7days  | r-front-toe-tip Average Hei | -0.3368922 | ID_3  |
| 7days  | r-front-toe-tip Average Hei | 0.25196417 | ID_4  |
| 7days  | r-front-toe-tip Average Hei | -0.3000916 | ID_5  |
| 7days  | r-front-toe-tip Average Hei | 0.27875009 | ID_6  |
| 7days  | r-front-toe-tip Average Hei | -0.2231241 | ID_7  |
| 7days  | r-front-toe-tip Average Hei | -0.3058005 | ID_8  |
| 7days  | r-front-toe-tip Average Hei | -0.1284495 | ID_9  |
| 14days | r-front-toe-tip Average Hei | 0.17720183 | ID_1  |
| 14days | r-front-toe-tip Average Hei | -0.4238257 | ID_2  |
| 14days | r-front-toe-tip Average Hei | 0.03896691 | ID_3  |
| 14days | r-front-toe-tip Average Hei | 0.18950152 | ID_4  |
| 14days | r-front-toe-tip Average Hei | 0.17184373 | ID_5  |
| 14days | r-front-toe-tip Average Hei | -0.4353274 | ID_6  |
| 14days | r-front-toe-tip Average Hei | 0.1754423  | ID_7  |
| 14days | r-front-toe-tip Average Hei | 0.2353217  | ID_8  |

|        |                              |            |       |
|--------|------------------------------|------------|-------|
| 14days | r-front-toe-tip__Average_Hei | -0.3142367 | ID_9  |
| 14days | r-front-toe-tip__Average_Hei | -0.0381014 | ID_10 |
| 14days | r-front-toe-tip__Average_Hei | -0.1564677 | ID_11 |
| 21days | r-front-toe-tip__Average_Hei | -0.2037808 | ID_1  |
| 21days | r-front-toe-tip__Average_Hei | -0.3479303 | ID_2  |
| 21days | r-front-toe-tip__Average_Hei | -0.3511617 | ID_3  |
| 21days | r-front-toe-tip__Average_Hei | 0.43123269 | ID_4  |
| 21days | r-front-toe-tip__Average_Hei | -0.5066782 | ID_5  |
| 21days | r-front-toe-tip__Average_Hei | 0.24663604 | ID_6  |
| 21days | r-front-toe-tip__Average_Hei | -0.1644824 | ID_7  |
| 21days | r-front-toe-tip__Average_Hei | 0.27898279 | ID_8  |
| 21days | r-front-toe-tip__Average_Hei | 0.19914095 | ID_9  |
| 21days | r-front-toe-tip__Average_Hei | 0.12763178 | ID_10 |
| 0days  | r-front-toe-tip__Movement    | 0.38925413 | ID_1  |
| 0days  | r-front-toe-tip__Movement    | 0          | ID_2  |
| 0days  | r-front-toe-tip__Movement    | -0.012741  | ID_3  |
| 0days  | r-front-toe-tip__Movement    | -0.0011338 | ID_4  |
| 0days  | r-front-toe-tip__Movement    | 0.09993967 | ID_5  |
| 0days  | r-front-toe-tip__Movement    | 0.29299115 | ID_6  |
| 0days  | r-front-toe-tip__Movement    | -0.0045303 | ID_7  |
| 0days  | r-front-toe-tip__Movement    | 1.39466025 | ID_8  |
| 0days  | r-front-toe-tip__Movement    | -0.5692494 | ID_9  |
| 0days  | r-front-toe-tip__Movement    | -0.5764126 | ID_10 |
| 0days  | r-front-toe-tip__Movement    | 0.27938092 | ID_11 |
| 0days  | r-front-toe-tip__Movement    | -0.4648929 | ID_12 |
| 0days  | r-front-toe-tip__Movement    | 0.25553153 | ID_13 |
| 3days  | r-front-toe-tip__Movement    | -0.4652572 | ID_1  |
| 3days  | r-front-toe-tip__Movement    | 0.01358452 | ID_2  |
| 3days  | r-front-toe-tip__Movement    | -0.3115956 | ID_3  |
| 3days  | r-front-toe-tip__Movement    | -0.1114153 | ID_4  |
| 3days  | r-front-toe-tip__Movement    | -0.0541393 | ID_5  |
| 3days  | r-front-toe-tip__Movement    | -0.1504963 | ID_6  |
| 3days  | r-front-toe-tip__Movement    | -0.5226726 | ID_7  |
| 3days  | r-front-toe-tip__Movement    | 0.10113918 | ID_8  |
| 7days  | r-front-toe-tip__Movement    | 0.29063786 | ID_1  |
| 7days  | r-front-toe-tip__Movement    | 0.83210408 | ID_2  |
| 7days  | r-front-toe-tip__Movement    | -0.5529492 | ID_3  |
| 7days  | r-front-toe-tip__Movement    | 0.46573136 | ID_4  |
| 7days  | r-front-toe-tip__Movement    | -0.4383184 | ID_5  |
| 7days  | r-front-toe-tip__Movement    | 0.58447269 | ID_6  |
| 7days  | r-front-toe-tip__Movement    | -0.727144  | ID_7  |
| 7days  | r-front-toe-tip__Movement    | -0.1118996 | ID_8  |
| 7days  | r-front-toe-tip__Movement    | -0.2620417 | ID_9  |
| 14days | r-front-toe-tip__Movement    | 0.4401529  | ID_1  |
| 14days | r-front-toe-tip__Movement    | -0.146346  | ID_2  |
| 14days | r-front-toe-tip__Movement    | -0.0910604 | ID_3  |
| 14days | r-front-toe-tip__Movement    | 0.62465954 | ID_4  |
| 14days | r-front-toe-tip__Movement    | 0.27596688 | ID_5  |
| 14days | r-front-toe-tip__Movement    | -1.1249305 | ID_6  |
| 14days | r-front-toe-tip__Movement    | 0.6489982  | ID_7  |
| 14days | r-front-toe-tip__Movement    | 0.56490184 | ID_8  |
| 14days | r-front-toe-tip__Movement    | -0.6545676 | ID_9  |
| 14days | r-front-toe-tip__Movement    | 0.19486483 | ID_10 |
| 14days | r-front-toe-tip__Movement    | -0.629778  | ID_11 |
| 21days | r-front-toe-tip__Movement    | -0.065203  | ID_1  |
| 21days | r-front-toe-tip__Movement    | -0.3671034 | ID_2  |

|        |                           |            |       |
|--------|---------------------------|------------|-------|
| 21days | r-front-toe-tip__Movement | -0.3778014 | ID_3  |
| 21days | r-front-toe-tip__Movement | 0.93774655 | ID_4  |
| 21days | r-front-toe-tip__Movement | -1.1437734 | ID_5  |
| 21days | r-front-toe-tip__Movement | 0.38580527 | ID_6  |
| 21days | r-front-toe-tip__Movement | -0.2891268 | ID_7  |
| 21days | r-front-toe-tip__Movement | 0.15692873 | ID_8  |
| 21days | r-front-toe-tip__Movement | 0.07725664 | ID_9  |
| 21days | r-front-toe-tip__Movement | 0.29202303 | ID_10 |
| 0days  | r-hip__Average_Height     | -0.4497609 | ID_1  |
| 0days  | r-hip__Average_Height     | -0.059288  | ID_2  |
| 0days  | r-hip__Average_Height     | 0          | ID_3  |
| 0days  | r-hip__Average_Height     | 0.46250577 | ID_4  |
| 0days  | r-hip__Average_Height     | -0.2079616 | ID_5  |
| 0days  | r-hip__Average_Height     | 0.01601584 | ID_6  |
| 0days  | r-hip__Average_Height     | 0.0162802  | ID_7  |
| 0days  | r-hip__Average_Height     | 0.19679759 | ID_8  |
| 0days  | r-hip__Average_Height     | -0.3757805 | ID_9  |
| 0days  | r-hip__Average_Height     | 0.02052768 | ID_10 |
| 0days  | r-hip__Average_Height     | -0.1778465 | ID_11 |
| 0days  | r-hip__Average_Height     | 0.40169812 | ID_12 |
| 0days  | r-hip__Average_Height     | -0.3324927 | ID_13 |
| 3days  | r-hip__Average_Height     | -0.4157003 | ID_1  |
| 3days  | r-hip__Average_Height     | -0.4197327 | ID_2  |
| 3days  | r-hip__Average_Height     | -0.2307823 | ID_3  |
| 3days  | r-hip__Average_Height     | -0.4071027 | ID_4  |
| 3days  | r-hip__Average_Height     | -0.2016535 | ID_5  |
| 3days  | r-hip__Average_Height     | -0.4136191 | ID_6  |
| 3days  | r-hip__Average_Height     | -0.0399806 | ID_7  |
| 3days  | r-hip__Average_Height     | 0.3522125  | ID_8  |
| 7days  | r-hip__Average_Height     | 0.01960609 | ID_1  |
| 7days  | r-hip__Average_Height     | -0.2428318 | ID_2  |
| 7days  | r-hip__Average_Height     | -0.0476098 | ID_3  |
| 7days  | r-hip__Average_Height     | 0.14324227 | ID_4  |
| 7days  | r-hip__Average_Height     | -0.0017086 | ID_5  |
| 7days  | r-hip__Average_Height     | -0.1109276 | ID_6  |
| 7days  | r-hip__Average_Height     | -0.411578  | ID_7  |
| 7days  | r-hip__Average_Height     | -0.190413  | ID_8  |
| 7days  | r-hip__Average_Height     | 0.22695951 | ID_9  |
| 14days | r-hip__Average_Height     | 0.2049254  | ID_1  |
| 14days | r-hip__Average_Height     | -0.0463459 | ID_2  |
| 14days | r-hip__Average_Height     | -0.1501316 | ID_3  |
| 14days | r-hip__Average_Height     | -0.1642908 | ID_4  |
| 14days | r-hip__Average_Height     | 0.13371959 | ID_5  |
| 14days | r-hip__Average_Height     | 0.217187   | ID_6  |
| 14days | r-hip__Average_Height     | -0.5425727 | ID_7  |
| 14days | r-hip__Average_Height     | -0.522632  | ID_8  |
| 14days | r-hip__Average_Height     | 0.22694619 | ID_9  |
| 14days | r-hip__Average_Height     | 0.00571137 | ID_10 |
| 14days | r-hip__Average_Height     | -0.0915817 | ID_11 |
| 21days | r-hip__Average_Height     | -0.0990266 | ID_1  |
| 21days | r-hip__Average_Height     | -0.5339945 | ID_2  |
| 21days | r-hip__Average_Height     | -0.4061764 | ID_3  |
| 21days | r-hip__Average_Height     | 0.40818297 | ID_4  |
| 21days | r-hip__Average_Height     | -0.1786207 | ID_5  |
| 21days | r-hip__Average_Height     | -0.1757608 | ID_6  |
| 21days | r-hip__Average_Height     | 0.24357971 | ID_7  |

|        |                              |            |       |
|--------|------------------------------|------------|-------|
| 21days | r-hip__Average_Height        | 0.59612176 | ID_8  |
| 21days | r-hip__Average_Height        | -0.0116845 | ID_9  |
| 21days | r-hip__Average_Height        | -0.112731  | ID_10 |
| 0days  | r-hip__Movement              | -0.5543281 | ID_1  |
| 0days  | r-hip__Movement              | 0.97697186 | ID_2  |
| 0days  | r-hip__Movement              | 0.46183821 | ID_3  |
| 0days  | r-hip__Movement              | 1.71775673 | ID_4  |
| 0days  | r-hip__Movement              | -0.4879813 | ID_5  |
| 0days  | r-hip__Movement              | 0          | ID_6  |
| 0days  | r-hip__Movement              | -0.3338742 | ID_7  |
| 0days  | r-hip__Movement              | 1.13570277 | ID_8  |
| 0days  | r-hip__Movement              | -0.8249045 | ID_9  |
| 0days  | r-hip__Movement              | -0.1916942 | ID_10 |
| 0days  | r-hip__Movement              | -0.0039839 | ID_11 |
| 0days  | r-hip__Movement              | 0.26954998 | ID_12 |
| 0days  | r-hip__Movement              | 0.00253249 | ID_13 |
| 3days  | r-hip__Movement              | -0.8315936 | ID_1  |
| 3days  | r-hip__Movement              | -0.599086  | ID_2  |
| 3days  | r-hip__Movement              | -0.317279  | ID_3  |
| 3days  | r-hip__Movement              | -0.7174234 | ID_4  |
| 3days  | r-hip__Movement              | -0.5445019 | ID_5  |
| 3days  | r-hip__Movement              | -0.630397  | ID_6  |
| 3days  | r-hip__Movement              | -0.0882008 | ID_7  |
| 3days  | r-hip__Movement              | 1.62112633 | ID_8  |
| 7days  | r-hip__Movement              | 0.13201038 | ID_1  |
| 7days  | r-hip__Movement              | -0.076238  | ID_2  |
| 7days  | r-hip__Movement              | -0.5621799 | ID_3  |
| 7days  | r-hip__Movement              | 0.44731972 | ID_4  |
| 7days  | r-hip__Movement              | -0.2004937 | ID_5  |
| 7days  | r-hip__Movement              | 0.38042612 | ID_6  |
| 7days  | r-hip__Movement              | -0.6785643 | ID_7  |
| 7days  | r-hip__Movement              | -0.0853527 | ID_8  |
| 7days  | r-hip__Movement              | 0.52051755 | ID_9  |
| 14days | r-hip__Movement              | 0.11939104 | ID_1  |
| 14days | r-hip__Movement              | -0.0290794 | ID_2  |
| 14days | r-hip__Movement              | 0.71295079 | ID_3  |
| 14days | r-hip__Movement              | -0.3349939 | ID_4  |
| 14days | r-hip__Movement              | 0.37541754 | ID_5  |
| 14days | r-hip__Movement              | 0.08961341 | ID_6  |
| 14days | r-hip__Movement              | -0.9189982 | ID_7  |
| 14days | r-hip__Movement              | -0.7602581 | ID_8  |
| 14days | r-hip__Movement              | 0.17726289 | ID_9  |
| 14days | r-hip__Movement              | 0.82457658 | ID_10 |
| 14days | r-hip__Movement              | -0.5056043 | ID_11 |
| 21days | r-hip__Movement              | -0.0628528 | ID_1  |
| 21days | r-hip__Movement              | -1.0330445 | ID_2  |
| 21days | r-hip__Movement              | -0.2517236 | ID_3  |
| 21days | r-hip__Movement              | 1.2426687  | ID_4  |
| 21days | r-hip__Movement              | -0.6463288 | ID_5  |
| 21days | r-hip__Movement              | 0.46505367 | ID_6  |
| 21days | r-hip__Movement              | 0.26521156 | ID_7  |
| 21days | r-hip__Movement              | 1.03866696 | ID_8  |
| 21days | r-hip__Movement              | -0.1559217 | ID_9  |
| 21days | r-hip__Movement              | -0.2562772 | ID_10 |
| 0days  | r-iliac-crest__Average_Heigh | -0.2505019 | ID_1  |
| 0days  | r-iliac-crest__Average_Heigh | 0.31183046 | ID_2  |

|        |               |          |       |            |       |
|--------|---------------|----------|-------|------------|-------|
| 0days  | r-iliac-crest | Average  | Heigh | 0.16535694 | ID_3  |
| 0days  | r-iliac-crest | Average  | Heigh | 0.504612   | ID_4  |
| 0days  | r-iliac-crest | Average  | Heigh | 0          | ID_5  |
| 0days  | r-iliac-crest | Average  | Heigh | 0.22236175 | ID_6  |
| 0days  | r-iliac-crest | Average  | Heigh | -0.0271328 | ID_7  |
| 0days  | r-iliac-crest | Average  | Heigh | 0.44566443 | ID_8  |
| 0days  | r-iliac-crest | Average  | Heigh | -0.1167121 | ID_9  |
| 0days  | r-iliac-crest | Average  | Heigh | 0.12722814 | ID_10 |
| 0days  | r-iliac-crest | Average  | Heigh | -0.1694924 | ID_11 |
| 0days  | r-iliac-crest | Average  | Heigh | -0.0818991 | ID_12 |
| 0days  | r-iliac-crest | Average  | Heigh | -0.1263372 | ID_13 |
| 3days  | r-iliac-crest | Average  | Heigh | -0.2488331 | ID_1  |
| 3days  | r-iliac-crest | Average  | Heigh | -0.0575799 | ID_2  |
| 3days  | r-iliac-crest | Average  | Heigh | -0.1217178 | ID_3  |
| 3days  | r-iliac-crest | Average  | Heigh | -0.1231048 | ID_4  |
| 3days  | r-iliac-crest | Average  | Heigh | -0.028291  | ID_5  |
| 3days  | r-iliac-crest | Average  | Heigh | -0.1996952 | ID_6  |
| 3days  | r-iliac-crest | Average  | Heigh | 0.20389234 | ID_7  |
| 3days  | r-iliac-crest | Average  | Heigh | 0.29356764 | ID_8  |
| 7days  | r-iliac-crest | Average  | Heigh | -0.0558289 | ID_1  |
| 7days  | r-iliac-crest | Average  | Heigh | 0.11319651 | ID_2  |
| 7days  | r-iliac-crest | Average  | Heigh | 0.03684093 | ID_3  |
| 7days  | r-iliac-crest | Average  | Heigh | 0.30489547 | ID_4  |
| 7days  | r-iliac-crest | Average  | Heigh | 0.03775729 | ID_5  |
| 7days  | r-iliac-crest | Average  | Heigh | 0.52473411 | ID_6  |
| 7days  | r-iliac-crest | Average  | Heigh | 0.69938113 | ID_7  |
| 7days  | r-iliac-crest | Average  | Heigh | -0.2851213 | ID_8  |
| 7days  | r-iliac-crest | Average  | Heigh | -0.3502932 | ID_9  |
| 14days | r-iliac-crest | Average  | Heigh | 0.23703158 | ID_1  |
| 14days | r-iliac-crest | Average  | Heigh | 0.13260314 | ID_2  |
| 14days | r-iliac-crest | Average  | Heigh | 0.40341246 | ID_3  |
| 14days | r-iliac-crest | Average  | Heigh | 0.12627804 | ID_4  |
| 14days | r-iliac-crest | Average  | Heigh | 0.6876098  | ID_5  |
| 14days | r-iliac-crest | Average  | Heigh | -0.011419  | ID_6  |
| 14days | r-iliac-crest | Average  | Heigh | -0.4675634 | ID_7  |
| 14days | r-iliac-crest | Average  | Heigh | -0.4001553 | ID_8  |
| 14days | r-iliac-crest | Average  | Heigh | 0.39091757 | ID_9  |
| 14days | r-iliac-crest | Average  | Heigh | 0.18609424 | ID_10 |
| 14days | r-iliac-crest | Average  | Heigh | 0.04278494 | ID_11 |
| 21days | r-iliac-crest | Average  | Heigh | -0.2106064 | ID_1  |
| 21days | r-iliac-crest | Average  | Heigh | -0.2841178 | ID_2  |
| 21days | r-iliac-crest | Average  | Heigh | -0.3105821 | ID_3  |
| 21days | r-iliac-crest | Average  | Heigh | 0.76170517 | ID_4  |
| 21days | r-iliac-crest | Average  | Heigh | -0.2154079 | ID_5  |
| 21days | r-iliac-crest | Average  | Heigh | 0.39869757 | ID_6  |
| 21days | r-iliac-crest | Average  | Heigh | -0.1317501 | ID_7  |
| 21days | r-iliac-crest | Average  | Heigh | 0.4514136  | ID_8  |
| 21days | r-iliac-crest | Average  | Heigh | 0.43861571 | ID_9  |
| 21days | r-iliac-crest | Average  | Heigh | 0.15495561 | ID_10 |
| 0days  | r-iliac-crest | Movement |       | -0.5478296 | ID_1  |
| 0days  | r-iliac-crest | Movement |       | 1.2688499  | ID_2  |
| 0days  | r-iliac-crest | Movement |       | 0.37669238 | ID_3  |
| 0days  | r-iliac-crest | Movement |       | 1.17802958 | ID_4  |
| 0days  | r-iliac-crest | Movement |       | -0.0773928 | ID_5  |
| 0days  | r-iliac-crest | Movement |       | 0.00950445 | ID_6  |
| 0days  | r-iliac-crest | Movement |       | -0.0847591 | ID_7  |

|        |                            |            |       |
|--------|----------------------------|------------|-------|
| 0days  | r-iliac-crest__Movement    | 1.91939243 | ID_8  |
| 0days  | r-iliac-crest__Movement    | -0.2848737 | ID_9  |
| 0days  | r-iliac-crest__Movement    | 0          | ID_10 |
| 0days  | r-iliac-crest__Movement    | 0.69444858 | ID_11 |
| 0days  | r-iliac-crest__Movement    | -0.2142627 | ID_12 |
| 0days  | r-iliac-crest__Movement    | -0.6708985 | ID_13 |
| 3days  | r-iliac-crest__Movement    | -0.67236   | ID_1  |
| 3days  | r-iliac-crest__Movement    | -0.3112036 | ID_2  |
| 3days  | r-iliac-crest__Movement    | -0.5177308 | ID_3  |
| 3days  | r-iliac-crest__Movement    | -0.3426203 | ID_4  |
| 3days  | r-iliac-crest__Movement    | -0.4293133 | ID_5  |
| 3days  | r-iliac-crest__Movement    | -0.3657583 | ID_6  |
| 3days  | r-iliac-crest__Movement    | 0.46783034 | ID_7  |
| 3days  | r-iliac-crest__Movement    | 0.92146101 | ID_8  |
| 7days  | r-iliac-crest__Movement    | -0.6382622 | ID_1  |
| 7days  | r-iliac-crest__Movement    | 0.51034028 | ID_2  |
| 7days  | r-iliac-crest__Movement    | -0.1402113 | ID_3  |
| 7days  | r-iliac-crest__Movement    | 0.95080326 | ID_4  |
| 7days  | r-iliac-crest__Movement    | -0.1795549 | ID_5  |
| 7days  | r-iliac-crest__Movement    | 1.4135252  | ID_6  |
| 7days  | r-iliac-crest__Movement    | 1.12129972 | ID_7  |
| 7days  | r-iliac-crest__Movement    | -0.4370683 | ID_8  |
| 7days  | r-iliac-crest__Movement    | -0.4894146 | ID_9  |
| 14days | r-iliac-crest__Movement    | 0.36710025 | ID_1  |
| 14days | r-iliac-crest__Movement    | 0.21510089 | ID_2  |
| 14days | r-iliac-crest__Movement    | 0.79584784 | ID_3  |
| 14days | r-iliac-crest__Movement    | 0.39869722 | ID_4  |
| 14days | r-iliac-crest__Movement    | 1.67559451 | ID_5  |
| 14days | r-iliac-crest__Movement    | 0.06223912 | ID_6  |
| 14days | r-iliac-crest__Movement    | -0.6342515 | ID_7  |
| 14days | r-iliac-crest__Movement    | -0.4390243 | ID_8  |
| 14days | r-iliac-crest__Movement    | 0.50996829 | ID_9  |
| 14days | r-iliac-crest__Movement    | 1.15494125 | ID_10 |
| 14days | r-iliac-crest__Movement    | 0.56894137 | ID_11 |
| 21days | r-iliac-crest__Movement    | -0.6107009 | ID_1  |
| 21days | r-iliac-crest__Movement    | -0.1710312 | ID_2  |
| 21days | r-iliac-crest__Movement    | -0.4965877 | ID_3  |
| 21days | r-iliac-crest__Movement    | 1.31765594 | ID_4  |
| 21days | r-iliac-crest__Movement    | -0.4556228 | ID_5  |
| 21days | r-iliac-crest__Movement    | 1.33111391 | ID_6  |
| 21days | r-iliac-crest__Movement    | -0.4287663 | ID_7  |
| 21days | r-iliac-crest__Movement    | 0.95618634 | ID_8  |
| 21days | r-iliac-crest__Movement    | 0.77571354 | ID_9  |
| 21days | r-iliac-crest__Movement    | -0.0321817 | ID_10 |
| 0days  | r-shoulder__Average_Height | -0.0410086 | ID_1  |
| 0days  | r-shoulder__Average_Height | -0.1994091 | ID_2  |
| 0days  | r-shoulder__Average_Height | 0.00507822 | ID_3  |
| 0days  | r-shoulder__Average_Height | 0.65070218 | ID_4  |
| 0days  | r-shoulder__Average_Height | 0          | ID_5  |
| 0days  | r-shoulder__Average_Height | 0.03556996 | ID_6  |
| 0days  | r-shoulder__Average_Height | -0.161415  | ID_7  |
| 0days  | r-shoulder__Average_Height | 0.78605563 | ID_8  |
| 0days  | r-shoulder__Average_Height | 0.145472   | ID_9  |
| 0days  | r-shoulder__Average_Height | -0.1727972 | ID_10 |
| 0days  | r-shoulder__Average_Height | -0.001637  | ID_11 |
| 0days  | r-shoulder__Average_Height | -0.0847022 | ID_12 |

|        |                            |            |       |
|--------|----------------------------|------------|-------|
| 0days  | r-shoulder__Average_Height | 0.02663445 | ID_13 |
| 3days  | r-shoulder__Average_Height | -0.3224065 | ID_1  |
| 3days  | r-shoulder__Average_Height | -0.039671  | ID_2  |
| 3days  | r-shoulder__Average_Height | 0.33247339 | ID_3  |
| 7days  | r-shoulder__Average_Height | -0.0463295 | ID_1  |
| 7days  | r-shoulder__Average_Height | 0.11004258 | ID_2  |
| 7days  | r-shoulder__Average_Height | -0.0734568 | ID_3  |
| 7days  | r-shoulder__Average_Height | -0.101915  | ID_4  |
| 7days  | r-shoulder__Average_Height | -0.1659842 | ID_5  |
| 7days  | r-shoulder__Average_Height | -0.1339037 | ID_6  |
| 7days  | r-shoulder__Average_Height | -0.031272  | ID_7  |
| 7days  | r-shoulder__Average_Height | -0.2939886 | ID_8  |
| 14days | r-shoulder__Average_Height | -0.1375322 | ID_1  |
| 14days | r-shoulder__Average_Height | -0.1722596 | ID_2  |
| 14days | r-shoulder__Average_Height | 0.00811027 | ID_3  |
| 14days | r-shoulder__Average_Height | -0.033674  | ID_4  |
| 14days | r-shoulder__Average_Height | -0.4199987 | ID_5  |
| 14days | r-shoulder__Average_Height | -0.016972  | ID_6  |
| 14days | r-shoulder__Average_Height | 0.03909872 | ID_7  |
| 14days | r-shoulder__Average_Height | 0.09131395 | ID_8  |
| 14days | r-shoulder__Average_Height | 0.18869352 | ID_9  |
| 21days | r-shoulder__Average_Height | -0.1975349 | ID_1  |
| 21days | r-shoulder__Average_Height | -0.2335856 | ID_2  |
| 21days | r-shoulder__Average_Height | -0.2111115 | ID_3  |
| 21days | r-shoulder__Average_Height | -0.0205237 | ID_4  |
| 21days | r-shoulder__Average_Height | -0.2132415 | ID_5  |
| 21days | r-shoulder__Average_Height | 0.42863289 | ID_6  |
| 21days | r-shoulder__Average_Height | -0.2062587 | ID_7  |
| 21days | r-shoulder__Average_Height | -0.1528395 | ID_8  |
| 0days  | r-shoulder__Movement       | 0.28274637 | ID_1  |
| 0days  | r-shoulder__Movement       | -0.5001339 | ID_2  |
| 0days  | r-shoulder__Movement       | 0.47819926 | ID_3  |
| 0days  | r-shoulder__Movement       | 1.48064408 | ID_4  |
| 0days  | r-shoulder__Movement       | 0.36421513 | ID_5  |
| 0days  | r-shoulder__Movement       | 0.37497867 | ID_6  |
| 0days  | r-shoulder__Movement       | -0.0597733 | ID_7  |
| 0days  | r-shoulder__Movement       | 1.38267606 | ID_8  |
| 0days  | r-shoulder__Movement       | 0          | ID_9  |
| 0days  | r-shoulder__Movement       | -0.2915515 | ID_10 |
| 0days  | r-shoulder__Movement       | -0.2088125 | ID_11 |
| 0days  | r-shoulder__Movement       | -0.3701008 | ID_12 |
| 0days  | r-shoulder__Movement       | -0.1323511 | ID_13 |
| 3days  | r-shoulder__Movement       | -0.7424135 | ID_1  |
| 3days  | r-shoulder__Movement       | -0.1246607 | ID_2  |
| 3days  | r-shoulder__Movement       | 0.36773151 | ID_3  |
| 7days  | r-shoulder__Movement       | -0.5371689 | ID_4  |
| 7days  | r-shoulder__Movement       | 0.04017472 | ID_5  |
| 7days  | r-shoulder__Movement       | -0.5611534 | ID_6  |
| 7days  | r-shoulder__Movement       | -0.4302203 | ID_7  |
| 7days  | r-shoulder__Movement       | -0.4650271 | ID_8  |
| 7days  | r-shoulder__Movement       | -0.3308973 | ID_1  |
| 7days  | r-shoulder__Movement       | -0.3384382 | ID_2  |
| 7days  | r-shoulder__Movement       | -0.2716098 | ID_3  |
| 14days | r-shoulder__Movement       | -0.3166392 | ID_4  |
| 14days | r-shoulder__Movement       | -0.4847344 | ID_5  |
| 14days | r-shoulder__Movement       | 0.03914954 | ID_6  |

|        |                             |            |       |
|--------|-----------------------------|------------|-------|
| 14days | r-shoulder__Movement        | 0.53511622 | ID_7  |
| 14days | r-shoulder__Movement        | -0.7019067 | ID_8  |
| 14days | r-shoulder__Movement        | -0.4604283 | ID_9  |
| 14days | r-shoulder__Movement        | -0.032709  | ID_1  |
| 14days | r-shoulder__Movement        | 0.27185114 | ID_2  |
| 14days | r-shoulder__Movement        | -0.1576145 | ID_3  |
| 21days | r-shoulder__Movement        | -0.6614872 | ID_4  |
| 21days | r-shoulder__Movement        | -0.4029086 | ID_5  |
| 21days | r-shoulder__Movement        | -0.6768168 | ID_6  |
| 21days | r-shoulder__Movement        | 0.09110983 | ID_7  |
| 21days | r-shoulder__Movement        | -0.3405079 | ID_8  |
| 21days | r-shoulder__Movement        | 0.2599305  | ID_9  |
| 21days | r-shoulder__Movement        | -0.3577997 | ID_10 |
| 21days | r-shoulder__Movement        | -0.4206061 | ID_11 |
| 0days  | r-tail-base__Average_Height | -0.3279288 | ID_1  |
| 0days  | r-tail-base__Average_Height | 0.18965672 | ID_2  |
| 0days  | r-tail-base__Average_Height | -0.1291052 | ID_3  |
| 0days  | r-tail-base__Average_Height | -0.1928172 | ID_4  |
| 0days  | r-tail-base__Average_Height | 0.51735276 | ID_5  |
| 0days  | r-tail-base__Average_Height | 1.24942018 | ID_6  |
| 0days  | r-tail-base__Average_Height | -0.2173085 | ID_7  |
| 0days  | r-tail-base__Average_Height | -0.2346401 | ID_8  |
| 0days  | r-tail-base__Average_Height | -0.7510641 | ID_9  |
| 0days  | r-tail-base__Average_Height | 0.12910519 | ID_10 |
| 0days  | r-tail-base__Average_Height | 0.91701353 | ID_11 |
| 0days  | r-tail-base__Average_Height | 0.62503555 | ID_12 |
| 3days  | r-tail-base__Average_Height | -0.0605289 | ID_13 |
| 3days  | r-tail-base__Average_Height | -0.0085418 | ID_1  |
| 3days  | r-tail-base__Average_Height | -0.1436656 | ID_2  |
| 3days  | r-tail-base__Average_Height | -0.0564892 | ID_3  |
| 3days  | r-tail-base__Average_Height | -0.5335647 | ID_4  |
| 3days  | r-tail-base__Average_Height | -0.3954393 | ID_5  |
| 3days  | r-tail-base__Average_Height | 0.6222008  | ID_6  |
| 3days  | r-tail-base__Average_Height | 0.44764986 | ID_7  |
| 7days  | r-tail-base__Average_Height | 0.48413936 | ID_8  |
| 7days  | r-tail-base__Average_Height | -0.7542402 | ID_1  |
| 7days  | r-tail-base__Average_Height | -0.6463946 | ID_2  |
| 7days  | r-tail-base__Average_Height | -0.4015599 | ID_3  |
| 7days  | r-tail-base__Average_Height | -0.0265957 | ID_4  |
| 7days  | r-tail-base__Average_Height | -0.2390397 | ID_5  |
| 7days  | r-tail-base__Average_Height | 0.23780745 | ID_6  |
| 7days  | r-tail-base__Average_Height | -0.3404965 | ID_7  |
| 7days  | r-tail-base__Average_Height | -0.2709525 | ID_8  |
| 14days | r-tail-base__Average_Height | 0.16090946 | ID_9  |
| 14days | r-tail-base__Average_Height | -0.2433202 | ID_1  |
| 14days | r-tail-base__Average_Height | -0.1217874 | ID_2  |
| 14days | r-tail-base__Average_Height | -0.404408  | ID_3  |
| 14days | r-tail-base__Average_Height | -0.1276667 | ID_4  |
| 14days | r-tail-base__Average_Height | 0.48894002 | ID_5  |
| 14days | r-tail-base__Average_Height | -0.5521597 | ID_6  |
| 14days | r-tail-base__Average_Height | -0.6625228 | ID_7  |
| 14days | r-tail-base__Average_Height | 0.42708776 | ID_8  |
| 14days | r-tail-base__Average_Height | 0.52358889 | ID_9  |
| 14days | r-tail-base__Average_Height | -0.5269455 | ID_10 |
| 21days | r-tail-base__Average_Height | -0.1884373 | ID_11 |
| 21days | r-tail-base__Average_Height | -0.3999281 | ID_1  |



|        |                             |            |       |
|--------|-----------------------------|------------|-------|
| 21days | r-tail-base__Average_Height | -0.1141487 | ID_2  |
| 21days | r-tail-base__Average_Height | -0.3506993 | ID_3  |
| 21days | r-tail-base__Average_Height | -0.4600231 | ID_4  |
| 21days | r-tail-base__Average_Height | -0.0594046 | ID_5  |
| 21days | r-tail-base__Average_Height | -0.6471636 | ID_6  |
| 21days | r-tail-base__Average_Height | -0.1401804 | ID_7  |
| 21days | r-tail-base__Average_Height | -0.074647  | ID_8  |
| 21days | r-tail-base__Average_Height | 0.25237762 | ID_9  |
| 0days  | r-tail-base__Movement       | -1.4884328 | ID_10 |
| 0days  | r-tail-base__Movement       | 0.6628308  | ID_1  |
| 0days  | r-tail-base__Movement       | -0.0280488 | ID_2  |
| 0days  | r-tail-base__Movement       | -0.7519261 | ID_3  |
| 0days  | r-tail-base__Movement       | 0.6841327  | ID_4  |
| 0days  | r-tail-base__Movement       | 1.21929734 | ID_5  |
| 0days  | r-tail-base__Movement       | -0.1554949 | ID_6  |
| 0days  | r-tail-base__Movement       | 0.02804877 | ID_7  |
| 0days  | r-tail-base__Movement       | -1.3594903 | ID_8  |
| 0days  | r-tail-base__Movement       | -0.4168364 | ID_9  |
| 0days  | r-tail-base__Movement       | 0.3103583  | ID_10 |
| 0days  | r-tail-base__Movement       | 0.44898195 | ID_11 |
| 3days  | r-tail-base__Movement       | -0.5096249 | ID_12 |
| 3days  | r-tail-base__Movement       | -0.2337252 | ID_13 |
| 3days  | r-tail-base__Movement       | 0.24137003 | ID_1  |
| 3days  | r-tail-base__Movement       | -0.2597581 | ID_2  |
| 3days  | r-tail-base__Movement       | -1.2060889 | ID_3  |
| 3days  | r-tail-base__Movement       | -0.4682711 | ID_4  |
| 3days  | r-tail-base__Movement       | 0.66638495 | ID_5  |
| 3days  | r-tail-base__Movement       | 0.66566255 | ID_6  |
| 7days  | r-tail-base__Movement       | 0.39704532 | ID_7  |
| 7days  | r-tail-base__Movement       | -1.146498  | ID_8  |
| 7days  | r-tail-base__Movement       | -1.4238269 | ID_1  |
| 7days  | r-tail-base__Movement       | -0.3049662 | ID_2  |
| 7days  | r-tail-base__Movement       | -0.6296294 | ID_3  |
| 7days  | r-tail-base__Movement       | -0.976006  | ID_4  |
| 7days  | r-tail-base__Movement       | -0.3438036 | ID_5  |
| 7days  | r-tail-base__Movement       | -1.4581196 | ID_6  |
| 7days  | r-tail-base__Movement       | -0.133536  | ID_7  |
| 14days | r-tail-base__Movement       | 2.08222264 | ID_8  |
| 14days | r-tail-base__Movement       | -0.4948627 | ID_9  |
| 14days | r-tail-base__Movement       | -0.2319818 | ID_1  |
| 14days | r-tail-base__Movement       | -1.3286843 | ID_2  |
| 14days | r-tail-base__Movement       | -0.8492673 | ID_3  |
| 14days | r-tail-base__Movement       | 0.62519524 | ID_4  |
| 14days | r-tail-base__Movement       | -1.6729081 | ID_5  |
| 14days | r-tail-base__Movement       | -1.5562913 | ID_6  |
| 14days | r-tail-base__Movement       | 0.54171191 | ID_7  |
| 14days | r-tail-base__Movement       | 0.09801549 | ID_8  |
| 14days | r-tail-base__Movement       | -0.3923154 | ID_9  |
| 21days | r-tail-base__Movement       | -0.5128268 | ID_10 |
| 21days | r-tail-base__Movement       | -1.0002567 | ID_11 |
| 21days | r-tail-base__Movement       | -0.7168314 | ID_1  |
| 21days | r-tail-base__Movement       | -1.4626938 | ID_2  |
| 21days | r-tail-base__Movement       | -1.5081911 | ID_3  |
| 21days | r-tail-base__Movement       | -0.3173735 | ID_4  |
| 21days | r-tail-base__Movement       | -0.6899591 | ID_5  |
| 21days | r-tail-base__Movement       | -1.1208162 | ID_6  |

|        |                         |            |       |
|--------|-------------------------|------------|-------|
| 21days | r-tail-base__Movement   | -1.1293678 | ID_7  |
| 21days | r-tail-base__Movement   | -0.0105076 | ID_8  |
| 0days  | r-wrist__Average_Height | 0.26295344 | ID_1  |
| 0days  | r-wrist__Average_Height | 0.51838424 | ID_2  |
| 0days  | r-wrist__Average_Height | 0.03283572 | ID_3  |
| 0days  | r-wrist__Average_Height | 0          | ID_4  |
| 0days  | r-wrist__Average_Height | -0.3560535 | ID_5  |
| 0days  | r-wrist__Average_Height | -0.1617122 | ID_6  |
| 0days  | r-wrist__Average_Height | -0.0015835 | ID_7  |
| 0days  | r-wrist__Average_Height | 0.38365351 | ID_8  |
| 0days  | r-wrist__Average_Height | -0.2755916 | ID_9  |
| 0days  | r-wrist__Average_Height | -0.216229  | ID_10 |
| 0days  | r-wrist__Average_Height | -0.5535379 | ID_11 |
| 0days  | r-wrist__Average_Height | 0.06851116 | ID_12 |
| 0days  | r-wrist__Average_Height | 0.23325182 | ID_13 |
| 3days  | r-wrist__Average_Height | -0.87      | ID_1  |
| 3days  | r-wrist__Average_Height | -0.6058212 | ID_2  |
| 3days  | r-wrist__Average_Height | -0.4749152 | ID_3  |
| 3days  | r-wrist__Average_Height | -0.7838648 | ID_4  |
| 3days  | r-wrist__Average_Height | -0.4865431 | ID_5  |
| 3days  | r-wrist__Average_Height | -0.2179645 | ID_6  |
| 3days  | r-wrist__Average_Height | -0.5395759 | ID_7  |
| 3days  | r-wrist__Average_Height | -0.3081241 | ID_8  |
| 7days  | r-wrist__Average_Height | -0.2724075 | ID_1  |
| 7days  | r-wrist__Average_Height | 0.52607768 | ID_2  |
| 7days  | r-wrist__Average_Height | -0.3460832 | ID_3  |
| 7days  | r-wrist__Average_Height | 0.28358721 | ID_4  |
| 7days  | r-wrist__Average_Height | -0.228636  | ID_5  |
| 7days  | r-wrist__Average_Height | 0.71822456 | ID_6  |
| 7days  | r-wrist__Average_Height | -0.7131964 | ID_7  |
| 7days  | r-wrist__Average_Height | -0.6053384 | ID_8  |
| 7days  | r-wrist__Average_Height | -0.6369777 | ID_9  |
| 14days | r-wrist__Average_Height | -0.428482  | ID_1  |
| 14days | r-wrist__Average_Height | -0.2108008 | ID_2  |
| 14days | r-wrist__Average_Height | 0.49135368 | ID_3  |
| 14days | r-wrist__Average_Height | 0.30058789 | ID_4  |
| 14days | r-wrist__Average_Height | 0.38267076 | ID_5  |
| 14days | r-wrist__Average_Height | -0.9187281 | ID_6  |
| 14days | r-wrist__Average_Height | 0.2700295  | ID_7  |
| 14days | r-wrist__Average_Height | 0.45310704 | ID_8  |
| 14days | r-wrist__Average_Height | -0.5165896 | ID_9  |
| 14days | r-wrist__Average_Height | 0.139375   | ID_10 |
| 14days | r-wrist__Average_Height | -0.6044063 | ID_11 |
| 21days | r-wrist__Average_Height | -0.0892213 | ID_1  |
| 21days | r-wrist__Average_Height | 0.21994043 | ID_2  |
| 21days | r-wrist__Average_Height | -0.2067468 | ID_3  |
| 21days | r-wrist__Average_Height | 0.54698761 | ID_4  |
| 21days | r-wrist__Average_Height | -0.5284613 | ID_5  |
| 21days | r-wrist__Average_Height | 0.43272774 | ID_6  |
| 21days | r-wrist__Average_Height | -0.5033973 | ID_7  |
| 21days | r-wrist__Average_Height | 0.10798609 | ID_8  |
| 21days | r-wrist__Average_Height | 0.56595993 | ID_9  |
| 21days | r-wrist__Average_Height | 0.32389897 | ID_10 |
| 0days  | r-wrist__Movement       | 0.1908363  | ID_1  |
| 0days  | r-wrist__Movement       | 0.81883435 | ID_2  |
| 0days  | r-wrist__Movement       | -0.1474982 | ID_3  |

|        |                    |            |       |
|--------|--------------------|------------|-------|
| 0days  | r-wrist__ Movement | 0.84177678 | ID_4  |
| 0days  | r-wrist__ Movement | 0.18972796 | ID_5  |
| 0days  | r-wrist__ Movement | -0.2184829 | ID_6  |
| 0days  | r-wrist__ Movement | -0.058932  | ID_7  |
| 0days  | r-wrist__ Movement | 1.2874895  | ID_8  |
| 0days  | r-wrist__ Movement | -0.0486132 | ID_9  |
| 0days  | r-wrist__ Movement | -0.2187028 | ID_10 |
| 0days  | r-wrist__ Movement | -0.47457   | ID_11 |
| 0days  | r-wrist__ Movement | 0          | ID_12 |
| 0days  | r-wrist__ Movement | 0.38107663 | ID_13 |
| 3days  | r-wrist__ Movement | -1.1042429 | ID_1  |
| 3days  | r-wrist__ Movement | -1.0237118 | ID_2  |
| 3days  | r-wrist__ Movement | -0.9050514 | ID_3  |
| 3days  | r-wrist__ Movement | -1.1928219 | ID_4  |
| 3days  | r-wrist__ Movement | 0.2480288  | ID_5  |
| 3days  | r-wrist__ Movement | -0.5360732 | ID_6  |
| 3days  | r-wrist__ Movement | -0.2693848 | ID_7  |
| 3days  | r-wrist__ Movement | -0.4260094 | ID_8  |
| 7days  | r-wrist__ Movement | -0.0994617 | ID_1  |
| 7days  | r-wrist__ Movement | 0.65778584 | ID_2  |
| 7days  | r-wrist__ Movement | -0.5010031 | ID_3  |
| 7days  | r-wrist__ Movement | 0.5203005  | ID_4  |
| 7days  | r-wrist__ Movement | -0.3331101 | ID_5  |
| 7days  | r-wrist__ Movement | 1.50076289 | ID_6  |
| 7days  | r-wrist__ Movement | -0.859766  | ID_7  |
| 7days  | r-wrist__ Movement | -0.7879348 | ID_8  |
| 7days  | r-wrist__ Movement | -0.7187565 | ID_9  |
| 14days | r-wrist__ Movement | -0.8010218 | ID_1  |
| 14days | r-wrist__ Movement | 0.11010138 | ID_2  |
| 14days | r-wrist__ Movement | 0.50357344 | ID_3  |
| 14days | r-wrist__ Movement | 0.2559005  | ID_4  |
| 14days | r-wrist__ Movement | 0.81963793 | ID_5  |
| 14days | r-wrist__ Movement | -1.1598687 | ID_6  |
| 14days | r-wrist__ Movement | 0.64383236 | ID_7  |
| 14days | r-wrist__ Movement | 0.53176811 | ID_8  |
| 14days | r-wrist__ Movement | -0.2621248 | ID_9  |
| 14days | r-wrist__ Movement | 0.34417921 | ID_10 |
| 14days | r-wrist__ Movement | -0.5241281 | ID_11 |
| 21days | r-wrist__ Movement | -0.1508607 | ID_1  |
| 21days | r-wrist__ Movement | 0.52496405 | ID_2  |
| 21days | r-wrist__ Movement | -0.332752  | ID_3  |
| 21days | r-wrist__ Movement | 0.88027179 | ID_4  |
| 21days | r-wrist__ Movement | -0.5483315 | ID_5  |
| 21days | r-wrist__ Movement | 0.62183994 | ID_6  |
| 21days | r-wrist__ Movement | -0.5415581 | ID_7  |
| 21days | r-wrist__ Movement | 0.04978707 | ID_8  |
| 21days | r-wrist__ Movement | 1.03831121 | ID_9  |
| 21days | r-wrist__ Movement | 1.07516934 | ID_10 |

---

**Suppl. Table 20: Summary of side perspective height analysis**

| day   | Measure                       | Value      | Mean       | Value | SD |
|-------|-------------------------------|------------|------------|-------|----|
| 0days | l-back-ankle__Average_Heig    | 0          | 0.67205514 |       |    |
| 0days | l-back-ankle__Movement        | 0          | 1.39839106 |       |    |
| 0days | l-back-toe__Average_Height    | 0          | 0.30972082 |       |    |
| 0days | l-back-toe__Movement          | 0          | 1.13500976 |       |    |
| 0days | l-elbow__Average_Height       | 0          | 0.2953487  |       |    |
| 0days | l-elbow__Movement             | 0          | 0.56956062 |       |    |
| 0days | l-front-toe-tip__Average_Hei  | 0          | 0.21328618 |       |    |
| 0days | l-front-toe-tip__Movement     | 0          | 0.68814422 |       |    |
| 0days | l-head__Average_Height        | 0          | 0.69609999 |       |    |
| 0days | l-head__Movement              | 0          | 1.78519764 |       |    |
| 0days | l-hip__Average_Height         | 0          | 0.27585357 |       |    |
| 0days | l-hip__Movement               | 0          | 0.58467604 |       |    |
| 0days | l-iliac-crest__Average_Heigh1 | 0          | 0.29740806 |       |    |
| 0days | l-iliac-crest__Movement       | 0          | 0.77458719 |       |    |
| 0days | l-shoulder__Average_Height    | 0          | 0.34751774 |       |    |
| 0days | l-shoulder__Movement          | 0          | 0.78403194 |       |    |
| 0days | l-tail-base__Average_Height   | 0          | 0.36446301 |       |    |
| 0days | l-tail-base__Movement         | 0          | 1.02050403 |       |    |
| 0days | l-wrist__Average_Height       | 0          | 0.4812395  |       |    |
| 0days | l-wrist__Movement             | 0          | 0.56512497 |       |    |
| 0days | r-back-ankle__Average_Heig    | 0          | 0.42151241 |       |    |
| 0days | r-back-ankle__Movement        | 0          | 0.81877275 |       |    |
| 0days | r-back-toe__Average_Height    | 0          | 0.15521927 |       |    |
| 0days | r-back-toe__Movement          | 0          | 0.61251167 |       |    |
| 0days | r-elbow__Average_Height       | 0          | 0.27137972 |       |    |
| 0days | r-elbow__Movement             | 0          | 0.58583293 |       |    |
| 0days | r-front-toe-tip__Average_Hei  | 0          | 0.21423905 |       |    |
| 0days | r-front-toe-tip__Movement     | 0          | 0.50975445 |       |    |
| 0days | r-head__Average_Height        | 0          | 0.29488311 |       |    |
| 0days | r-head__Movement              | 0          | 0.89707013 |       |    |
| 0days | r-hip__Average_Height         | 0          | 0.27823373 |       |    |
| 0days | r-hip__Movement               | 0          | 0.73561941 |       |    |
| 0days | r-iliac-crest__Average_Heigh  | 0          | 0.24053368 |       |    |
| 0days | r-iliac-crest__Movement       | 0          | 0.77555514 |       |    |
| 0days | r-shoulder__Average_Height    | 0          | 0.30191406 |       |    |
| 0days | r-shoulder__Movement          | 0          | 0.62044276 |       |    |
| 0days | r-tail-base__Average_Height   | 0          | 0.57825888 |       |    |
| 0days | r-tail-base__Movement         | 0          | 0.82356179 |       |    |
| 0days | r-wrist__Average_Height       | 0          | 0.30645097 |       |    |
| 0days | r-wrist__Movement             | 0          | 0.50869838 |       |    |
| 3days | l-back-ankle__Average_Heig    | 0.02570948 | 0.58695474 |       |    |
| 3days | l-back-ankle__Movement        | 0.01975225 | 1.19471529 |       |    |
| 3days | l-back-toe__Average_Height    | -0.2515432 | 0.09761713 |       |    |
| 3days | l-back-toe__Movement          | -1.1891297 | 0.30131302 |       |    |
| 3days | l-elbow__Average_Height       | -0.1817734 | 0.11139445 |       |    |
| 3days | l-elbow__Movement             | -0.6664027 | 0.23348492 |       |    |
| 3days | l-front-toe-tip__Average_Hei  | -0.4894445 | 0.15474541 |       |    |
| 3days | l-front-toe-tip__Movement     | -0.7720142 | 0.32233553 |       |    |
| 3days | l-head__Average_Height        | -0.6188926 | 0.2477646  |       |    |
| 3days | l-head__Movement              | -2.4197983 | 0.85032677 |       |    |
| 3days | l-hip__Average_Height         | -0.3319208 | 0.26338908 |       |    |
| 3days | l-hip__Movement               | -0.4688948 | 0.70446915 |       |    |
| 3days | l-iliac-crest__Average_Heigh1 | -0.1741278 | 0.2886531  |       |    |
| 3days | l-iliac-crest__Movement       | -0.6873641 | 0.75218416 |       |    |

|       |                               |            |            |
|-------|-------------------------------|------------|------------|
| 3days | l-shoulder__Average_Height    | -0.2549553 | 0.1938969  |
| 3days | l-shoulder__Movement          | -0.7711989 | 0.23496572 |
| 3days | l-tail-base__Average_Height   | -0.1843617 | 0.50454738 |
| 3days | l-tail-base__Movement         | -0.8913054 | 0.90303613 |
| 3days | l-wrist__Average_Height       | -0.6604331 | 0.33195927 |
| 3days | l-wrist__Movement             | -0.8620946 | 0.59232428 |
| 3days | r-back-ankle__Average_Heig    | 0.29535306 | 0.54584935 |
| 3days | r-back-ankle__Movement        | -0.2481358 | 1.08787015 |
| 3days | r-back-toe__Average_Height    | -0.1167776 | 0.14477382 |
| 3days | r-back-toe__Movement          | -0.2128761 | 0.65892732 |
| 3days | r-elbow__Average_Height       | -0.4631945 | 0.25532092 |
| 3days | r-elbow__Movement             | -0.9819639 | 0.52538211 |
| 3days | r-front-toe-tip__Average_Hei  | -0.2258158 | 0.16613749 |
| 3days | r-front-toe-tip__Movement     | -0.1309558 | 0.22474753 |
| 3days | r-head__Average_Height        | -0.5023801 | 0.6731405  |
| 3days | r-head__Movement              | -1.3000743 | 1.40052281 |
| 3days | r-hip__Average_Height         | -0.3189425 | 0.27016954 |
| 3days | r-hip__Movement               | -0.5717939 | 0.7964572  |
| 3days | r-iliac-crest__Average_Heigh  | -0.0896488 | 0.19038016 |
| 3days | r-iliac-crest__Movement       | -0.3541893 | 0.5509961  |
| 3days | r-shoulder__Average_Height    | -0.039671  | 0.32845559 |
| 3days | r-shoulder__Movement          | -0.1246607 | 0.55625091 |
| 3days | r-tail-base__Average_Height   | -0.058509  | 0.38805286 |
| 3days | r-tail-base__Movement         | -0.2467417 | 0.63794498 |
| 3days | r-wrist__Average_Height       | -0.5130595 | 0.21945775 |
| 3days | r-wrist__Movement             | -0.7205623 | 0.49571998 |
| 7days | l-back-ankle__Average_Heig    | -0.351378  | 0.37982559 |
| 7days | l-back-ankle__Movement        | -0.6315821 | 0.54145176 |
| 7days | l-back-toe__Average_Height    | -0.18197   | 0.10763682 |
| 7days | l-back-toe__Movement          | -1.1917231 | 0.4414276  |
| 7days | l-elbow__Average_Height       | -0.1196973 | 0.19817834 |
| 7days | l-elbow__Movement             | -0.2017046 | 0.64264963 |
| 7days | l-front-toe-tip__Average_Hei  | -0.3830309 | 0.06593579 |
| 7days | l-front-toe-tip__Movement     | -0.7220486 | 0.16284231 |
| 7days | l-head__Average_Height        | -0.7840083 | 0.58142185 |
| 7days | l-head__Movement              | -2.0484046 | 1.41819698 |
| 7days | l-hip__Average_Height         | -0.2643041 | 0.28978815 |
| 7days | l-hip__Movement               | -0.3605221 | 0.49323238 |
| 7days | l-iliac-crest__Average_Height | -0.2711173 | 0.29193128 |
| 7days | l-iliac-crest__Movement       | -0.5854092 | 0.65743408 |
| 7days | l-shoulder__Average_Height    | -0.2049188 | 0.15827927 |
| 7days | l-shoulder__Movement          | -0.7485486 | 0.19805054 |
| 7days | l-tail-base__Average_Height   | -0.19543   | 0.30844884 |
| 7days | l-tail-base__Movement         | -0.5314102 | 0.79321631 |
| 7days | l-wrist__Average_Height       | -0.7732756 | 0.24734098 |
| 7days | l-wrist__Movement             | -1.0666631 | 0.46789948 |
| 7days | r-back-ankle__Average_Heig    | 0.36533421 | 0.38194934 |
| 7days | r-back-ankle__Movement        | 0.05341691 | 0.98345023 |
| 7days | r-back-toe__Average_Height    | -0.0422763 | 0.32740692 |
| 7days | r-back-toe__Movement          | 0.57444742 | 0.54023539 |
| 7days | r-elbow__Average_Height       | -0.269897  | 0.17864471 |
| 7days | r-elbow__Movement             | -0.9367159 | 0.215844   |
| 7days | r-front-toe-tip__Average_Hei  | -0.1284495 | 0.28579316 |
| 7days | r-front-toe-tip__Movement     | -0.1118996 | 0.55254655 |
| 7days | r-head__Average_Height        | -0.2459201 | 0.57873624 |
| 7days | r-head__Movement              | -1.0167984 | 1.4092157  |

|        |                              |            |            |
|--------|------------------------------|------------|------------|
| 7days  | r-hip__Average_Height        | -0.0476098 | 0.19670667 |
| 7days  | r-hip__Movement              | -0.076238  | 0.42739124 |
| 7days  | r-ilic-crest__Average_Heigh  | 0.03775729 | 0.34700319 |
| 7days  | r-ilic-crest__Movement       | -0.1402113 | 0.77575065 |
| 7days  | r-shoulder__Average_Height   | -0.0876859 | 0.11653689 |
| 7days  | r-shoulder__Movement         | -0.3843292 | 0.19162907 |
| 7days  | r-tail-base__Average_Height  | -0.2709525 | 0.39692806 |
| 7days  | r-tail-base__Movement        | -0.6296294 | 0.63025073 |
| 7days  | r-wrist__Average_Height      | -0.2724075 | 0.52672929 |
| 7days  | r-wrist__Movement            | -0.3331101 | 0.80322153 |
| 14days | l-back-ankle__Average_Heig   | 0.0320646  | 0.6093304  |
| 14days | l-back-ankle__Movement       | 0.27062048 | 0.84411346 |
| 14days | l-back-toe__Average_Height   | -0.1521897 | 0.16525996 |
| 14days | l-back-toe__Movement         | -0.8431799 | 0.82663937 |
| 14days | l-elbow__Average_Height      | 0.17608252 | 0.3304861  |
| 14days | l-elbow__Movement            | 0.70404172 | 0.74357192 |
| 14days | l-front-toe-tip__Average_Hei | -0.2986062 | 0.26680589 |
| 14days | l-front-toe-tip__Movement    | -0.419892  | 0.58181483 |
| 14days | l-head__Average_Height       | -0.1329957 | 0.62624392 |
| 14days | l-head__Movement             | -0.9574556 | 1.68229377 |
| 14days | l-hip__Average_Height        | -0.4010188 | 0.35154962 |
| 14days | l-hip__Movement              | -0.0778198 | 0.70516224 |
| 14days | l-ilic-crest__Average_Height | -0.4039169 | 0.28894924 |
| 14days | l-ilic-crest__Movement       | -0.6846737 | 0.79258113 |
| 14days | l-shoulder__Average_Height   | 0.02657494 | 0.18503801 |
| 14days | l-shoulder__Movement         | -0.1772168 | 0.41194747 |
| 14days | l-tail-base__Average_Height  | -0.3294469 | 0.65252075 |
| 14days | l-tail-base__Movement        | -0.9008344 | 1.13319296 |
| 14days | l-wrist__Average_Height      | -0.7906645 | 0.4105328  |
| 14days | l-wrist__Movement            | -0.7988941 | 0.54820836 |
| 14days | r-back-ankle__Average_Heig   | 0.70032853 | 0.4892584  |
| 14days | r-back-ankle__Movement       | 0.57465742 | 1.0550547  |
| 14days | r-back-toe__Average_Height   | 0.14321988 | 0.31110989 |
| 14days | r-back-toe__Movement         | 0.51693385 | 0.87934271 |
| 14days | r-elbow__Average_Height      | -0.2750497 | 0.20660772 |
| 14days | r-elbow__Movement            | -0.6878739 | 0.47170411 |
| 14days | r-front-toe-tip__Average_Hei | 0.03896691 | 0.2579201  |
| 14days | r-front-toe-tip__Movement    | 0.19486483 | 0.59646224 |
| 14days | r-head__Average_Height       | 0.00655582 | 0.68196822 |
| 14days | r-head__Movement             | -0.4262264 | 1.52949285 |
| 14days | r-hip__Average_Height        | -0.0463459 | 0.27163519 |
| 14days | r-hip__Movement              | 0.08961341 | 0.5628902  |
| 14days | r-ilic-crest__Average_Heigh  | 0.13260314 | 0.33662786 |
| 14days | r-ilic-crest__Movement       | 0.39869722 | 0.65654526 |
| 14days | r-shoulder__Average_Height   | -0.016972  | 0.17646677 |
| 14days | r-shoulder__Movement         | -0.1576145 | 0.39330664 |
| 14days | r-tail-base__Average_Height  | -0.1276667 | 0.43576028 |
| 14days | r-tail-base__Movement        | -0.3923154 | 1.10773143 |
| 14days | r-wrist__Average_Height      | 0.139375   | 0.49423445 |
| 14days | r-wrist__Movement            | 0.2559005  | 0.64262869 |
| 21days | l-back-ankle__Average_Heig   | -0.2302505 | 0.8024245  |
| 21days | l-back-ankle__Movement       | -0.7434575 | 1.19399032 |
| 21days | l-back-toe__Average_Height   | -0.0553157 | 0.16828268 |
| 21days | l-back-toe__Movement         | -0.5940266 | 0.6753578  |
| 21days | l-elbow__Average_Height      | 0.18487568 | 0.41207686 |
| 21days | l-elbow__Movement            | 0.26455313 | 0.96353144 |

|        |                               |            |            |
|--------|-------------------------------|------------|------------|
| 21days | l-front-toe-tip__Average_Hei  | -0.0893582 | 0.26423018 |
| 21days | l-front-toe-tip__Movement     | -0.1606363 | 0.57479182 |
| 21days | l-head__Average_Height        | -0.3836985 | 0.66208614 |
| 21days | l-head__Movement              | -1.8546309 | 1.604357   |
| 21days | l-hip__Average_Height         | -0.1809973 | 0.26610034 |
| 21days | l-hip__Movement               | -0.1865542 | 0.59149771 |
| 21days | l-iliac-crest__Average_Height | -0.0731095 | 0.33413492 |
| 21days | l-iliac-crest__Movement       | -0.3395875 | 0.55901705 |
| 21days | l-shoulder__Average_Height    | -0.0736804 | 0.18763304 |
| 21days | l-shoulder__Movement          | -0.4397853 | 0.25248021 |
| 21days | l-tail-base__Average_Height   | -0.2371947 | 0.25386117 |
| 21days | l-tail-base__Movement         | -0.9806249 | 0.53855857 |
| 21days | l-wrist__Average_Height       | -0.3176237 | 0.38897663 |
| 21days | l-wrist__Movement             | 0.06593108 | 0.73611936 |
| 21days | r-back-ankle__Average_Heig    | 0.42509925 | 0.43154865 |
| 21days | r-back-ankle__Movement        | 0.73807505 | 0.99192076 |
| 21days | r-back-toe__Average_Height    | 0.14850844 | 0.36265549 |
| 21days | r-back-toe__Movement          | 0.49927316 | 0.99247557 |
| 21days | r-elbow__Average_Height       | -0.0764663 | 0.35030255 |
| 21days | r-elbow__Movement             | -0.4391015 | 0.8225804  |
| 21days | r-front-toe-tip__Average_Hei  | -0.0184253 | 0.32348955 |
| 21days | r-front-toe-tip__Movement     | 0.00602683 | 0.55799092 |
| 21days | r-head__Average_Height        | -0.1934474 | 0.36130061 |
| 21days | r-head__Movement              | -0.6266862 | 0.79998934 |
| 21days | r-hip__Average_Height         | -0.1058788 | 0.35112317 |
| 21days | r-hip__Movement               | -0.1093872 | 0.70830282 |
| 21days | r-iliac-crest__Average_Height | 0.01160277 | 0.38496129 |
| 21days | r-iliac-crest__Movement       | -0.1016065 | 0.78793804 |
| 21days | r-shoulder__Average_Height    | -0.2018968 | 0.22436402 |
| 21days | r-shoulder__Movement          | -0.3803541 | 0.33118472 |
| 21days | r-tail-base__Average_Height   | -0.1643088 | 0.25345077 |
| 21days | r-tail-base__Movement         | -0.858544  | 0.48624961 |
| 21days | r-wrist__Average_Height       | 0.16396326 | 0.405443   |
| 21days | r-wrist__Movement             | 0.28737556 | 0.64259529 |

**Suppl. Table 21: Statistical test of bside perspective height analysis**

| Measure                  | group1 | group2 | p.adj      | sig | Test                   |
|--------------------------|--------|--------|------------|-----|------------------------|
| l-wrist_Movement         | 0days  | 7days  | 0.00033674 | *** | Repeat ANOVA + PH test |
| l-wrist_Movement         | 0days  | 3days  | 0.00034229 | *** | Repeat ANOVA + PH test |
| l-back-toe_Movement      | 0days  | 7days  | 0.00086311 | *** | Repeat ANOVA + PH test |
| l-back-toe_Movement      | 0days  | 3days  | 0.00086311 | *** | Repeat ANOVA + PH test |
| l-front-toe-tip_Movement | 0days  | 7days  | 0.00281907 | **  | Repeat ANOVA + PH test |
| l-front-toe-tip_Movement | 0days  | 3days  | 0.00662191 | **  | Repeat ANOVA + PH test |
| r-head_Movement          | 0days  | 3days  | 0.00870331 | **  | Repeat ANOVA + PH test |
| r-back-ankle_Movement    | 0days  | 14days | 0.00887464 | **  | Repeat ANOVA + PH test |
| l-wrist_Movement         | 0days  | 14days | 0.0103341  | *   | Repeat ANOVA + PH test |
| r-wrist_Movement         | 0days  | 3days  | 0.01154712 | *   | Repeat ANOVA + PH test |
| l-back-ankle_Movement    | 0days  | 21days | 0.01242591 | *   | Repeat ANOVA + PH test |
| r-elbow_Movement         | 0days  | 7days  | 0.01630839 | *   | Repeat ANOVA + PH test |
| r-tail-base_Movement     | 0days  | 21days | 0.01656914 | *   | Repeat ANOVA + PH test |
| l-shoulder_Movement      | 0days  | 7days  | 0.01905166 | *   | Repeat ANOVA + PH test |
| l-back-toe_Movement      | 0days  | 14days | 0.02112799 | *   | Repeat ANOVA + PH test |
| l-back-toe_Movement      | 0days  | 21days | 0.02431522 | *   | Repeat ANOVA + PH test |
| r-back-toe_Movement      | 0days  | 21days | 0.03658615 | *   | Repeat ANOVA + PH test |
| l-wrist_Average_Height   | 0days  | 14days | 0.03960501 | *   | Repeat ANOVA + PH test |
| l-wrist_Average_Height   | 0days  | 3days  | 0.04154142 | *   | Repeat ANOVA + PH test |
| l-shoulder_Movement      | 0days  | 3days  | 0.04981773 | *   | Repeat ANOVA + PH test |
| l-wrist_Average_Height   | 0days  | 7days  | 0.05797498 | *   | Repeat ANOVA + PH test |
| r-elbow_Movement         | 0days  | 3days  | 0.05872624 | *   | Repeat ANOVA + PH test |
| l-back-ankle_Movement    | 0days  | 3days  | 0.06160991 | *   | Repeat ANOVA + PH test |
| l-back-ankle_Movement    | 0days  | 7days  | 0.06160991 | *   | Repeat ANOVA + PH test |
| l-elbow_Movement         | 0days  | 3days  | 0.0680736  | *   | Repeat ANOVA + PH test |
| r-head_Movement          | 0days  | 7days  | 0.07106673 | *   | Repeat ANOVA + PH test |
| l-iliac-crest_Movement   | 0days  | 14days | 0.07607329 | *   | Repeat ANOVA + PH test |
| r-head_Movement          | 0days  | 21days | 0.08018946 | *   | Repeat ANOVA + PH test |
| r-tail-base_Movement     | 0days  | 7days  | 0.09549484 | *   | Repeat ANOVA + PH test |
| l-shoulder_Movement      | 0days  | 21days | 0.09593472 | *   | Repeat ANOVA + PH test |
| r-elbow_Movement         | 0days  | 14days | 0.10261614 | ns  | Repeat ANOVA + PH test |
| r-back-ankle_Movement    | 0days  | 21days | 0.1363321  | ns  | Repeat ANOVA + PH test |
| l-front-toe-tip_Movement | 0days  | 14days | 0.14456596 | ns  | Repeat ANOVA + PH test |
| l-hip_Movement           | 0days  | 7days  | 0.14519584 | ns  | Repeat ANOVA + PH test |
| l-hip_Movement           | 0days  | 3days  | 0.14519584 | ns  | Repeat ANOVA + PH test |
| l-hip_Movement           | 0days  | 14days | 0.14519584 | ns  | Repeat ANOVA + PH test |
| l-hip_Movement           | 0days  | 21days | 0.14519584 | ns  | Repeat ANOVA + PH test |
| l-front-toe-tip_Movement | 0days  | 21days | 0.16410928 | ns  | Repeat ANOVA + PH test |
| r-shoulder_Movement      | 0days  | 7days  | 0.16842294 | ns  | Repeat ANOVA + PH test |
| l-elbow_Movement         | 0days  | 21days | 0.18648537 | ns  | Repeat ANOVA + PH test |
| r-shoulder_Movement      | 0days  | 21days | 0.18735186 | ns  | Repeat ANOVA + PH test |
| r-wrist_Average_Height   | 0days  | 3days  | 0.24632881 | ns  | Repeat ANOVA + PH test |
| l-shoulder_Movement      | 0days  | 14days | 0.26841028 | ns  | Repeat ANOVA + PH test |
| l-tail-base_Movement     | 0days  | 21days | 0.28857549 | ns  | Repeat ANOVA + PH test |
| r-head_Movement          | 0days  | 14days | 0.29530385 | ns  | Repeat ANOVA + PH test |
| l-iliac-crest_Movement   | 0days  | 7days  | 0.3239988  | ns  | Repeat ANOVA + PH test |
| l-iliac-crest_Movement   | 0days  | 3days  | 0.3239988  | ns  | Repeat ANOVA + PH test |
| l-iliac-crest_Movement   | 0days  | 21days | 0.3239988  | ns  | Repeat ANOVA + PH test |
| r-shoulder_Movement      | 0days  | 14days | 0.37581512 | ns  | Repeat ANOVA + PH test |
| r-shoulder_Movement      | 0days  | 3days  | 0.37581512 | ns  | Repeat ANOVA + PH test |
| l-elbow_Movement         | 0days  | 14days | 0.38853879 | ns  | Repeat ANOVA + PH test |
| r-back-toe_Movement      | 0days  | 14days | 0.40695018 | ns  | Repeat ANOVA + PH test |
| r-back-toe_Movement      | 0days  | 7days  | 0.40778698 | ns  | Repeat ANOVA + PH test |
| l-elbow_Movement         | 0days  | 7days  | 0.4104934  | ns  | Repeat ANOVA + PH test |



|                              |       |        |            |    |                        |
|------------------------------|-------|--------|------------|----|------------------------|
| l-wrist__Average_Height      | 0days | 21days | 0.4227289  | ns | Repeat ANOVA + PH test |
| l-back-ankle__Movement       | 0days | 14days | 0.51051272 | ns | Repeat ANOVA + PH test |
| r-iliac-crest__Movement      | 0days | 3days  | 0.51755507 | ns | Repeat ANOVA + PH test |
| r-hip__Movement              | 0days | 3days  | 0.51909376 | ns | Repeat ANOVA + PH test |
| r-elbow__Movement            | 0days | 21days | 0.54997212 | ns | Repeat ANOVA + PH test |
| l-front-toe-tip__Average_He  | 0days | 3days  | 0.62671622 | ns | Repeat ANOVA + PH test |
| r-tail-base__Average_Height  | 0days | 21days | 0.70378738 | ns | Repeat ANOVA + PH test |
| r-tail-base__Average_Height  | 0days | 7days  | 0.70378738 | ns | Repeat ANOVA + PH test |
| r-tail-base__Average_Height  | 0days | 14days | 0.71642155 | ns | Repeat ANOVA + PH test |
| r-tail-base__Average_Height  | 0days | 3days  | 0.71642155 | ns | Repeat ANOVA + PH test |
| l-wrist__Movement            | 0days | 21days | 0.72937234 | ns | Repeat ANOVA + PH test |
| l-front-toe-tip__Average_He  | 0days | 7days  | 0.74647315 | ns | Repeat ANOVA + PH test |
| l-front-toe-tip__Average_He  | 0days | 14days | 0.74647315 | ns | Repeat ANOVA + PH test |
| l-front-toe-tip__Average_He  | 0days | 21days | 0.74647315 | ns | Repeat ANOVA + PH test |
| r-back-ankle__Average_Hei    | 0days | 14days | 0.80579192 | ns | Repeat ANOVA + PH test |
| r-tail-base__Movement        | 0days | 14days | 0.81479353 | ns | Repeat ANOVA + PH test |
| r-tail-base__Movement        | 0days | 3days  | 0.8150049  | ns | Repeat ANOVA + PH test |
| r-back-toe__Movement         | 0days | 3days  | 0.89626413 | ns | Repeat ANOVA + PH test |
| l-iliac-crest__Average_Heigh | 0days | 14days | 0.9075294  | ns | Repeat ANOVA + PH test |
| l-tail-base__Movement        | 0days | 14days | 0.92793154 | ns | Repeat ANOVA + PH test |
| l-back-ankle__Average_Hei    | 0days | 7days  | 1          | ns | Repeat ANOVA + PH test |
| l-back-ankle__Average_Hei    | 0days | 21days | 1          | ns | Repeat ANOVA + PH test |
| l-back-ankle__Average_Hei    | 0days | 14days | 1          | ns | Repeat ANOVA + PH test |
| l-back-ankle__Average_Hei    | 0days | 3days  | 1          | ns | Repeat ANOVA + PH test |
| l-back-toe__Average_Heigh    | 0days | 3days  | 1          | ns | Repeat ANOVA + PH test |
| l-back-toe__Average_Heigh    | 0days | 7days  | 1          | ns | Repeat ANOVA + PH test |
| l-back-toe__Average_Heigh    | 0days | 14days | 1          | ns | Repeat ANOVA + PH test |
| l-back-toe__Average_Heigh    | 0days | 21days | 1          | ns | Repeat ANOVA + PH test |
| l-elbow__Average_Height      | 0days | 21days | 1          | ns | Repeat ANOVA + PH test |
| l-elbow__Average_Height      | 0days | 14days | 1          | ns | Repeat ANOVA + PH test |
| l-elbow__Average_Height      | 0days | 3days  | 1          | ns | Repeat ANOVA + PH test |
| l-elbow__Average_Height      | 0days | 7days  | 1          | ns | Repeat ANOVA + PH test |
| l-hip__Average_Height        | 0days | 14days | 1          | ns | Repeat ANOVA + PH test |
| l-hip__Average_Height        | 0days | 7days  | 1          | ns | Repeat ANOVA + PH test |
| l-hip__Average_Height        | 0days | 3days  | 1          | ns | Repeat ANOVA + PH test |
| l-hip__Average_Height        | 0days | 21days | 1          | ns | Repeat ANOVA + PH test |
| l-iliac-crest__Average_Heigh | 0days | 7days  | 1          | ns | Repeat ANOVA + PH test |
| l-iliac-crest__Average_Heigh | 0days | 3days  | 1          | ns | Repeat ANOVA + PH test |
| l-iliac-crest__Average_Heigh | 0days | 21days | 1          | ns | Repeat ANOVA + PH test |
| l-shoulder__Average_Heigh    | 0days | 7days  | 1          | ns | Repeat ANOVA + PH test |
| l-shoulder__Average_Heigh    | 0days | 3days  | 1          | ns | Repeat ANOVA + PH test |
| l-shoulder__Average_Heigh    | 0days | 21days | 1          | ns | Repeat ANOVA + PH test |
| l-shoulder__Average_Heigh    | 0days | 14days | 1          | ns | Repeat ANOVA + PH test |
| l-tail-base__Average_Height  | 0days | 21days | 1          | ns | Repeat ANOVA + PH test |
| l-tail-base__Average_Height  | 0days | 7days  | 1          | ns | Repeat ANOVA + PH test |
| l-tail-base__Average_Height  | 0days | 3days  | 1          | ns | Repeat ANOVA + PH test |
| l-tail-base__Average_Height  | 0days | 14days | 1          | ns | Repeat ANOVA + PH test |
| l-tail-base__Movement        | 0days | 7days  | 1          | ns | Repeat ANOVA + PH test |
| l-tail-base__Movement        | 0days | 3days  | 1          | ns | Repeat ANOVA + PH test |
| r-back-ankle__Average_Hei    | 0days | 21days | 1          | ns | Repeat ANOVA + PH test |
| r-back-ankle__Average_Hei    | 0days | 7days  | 1          | ns | Repeat ANOVA + PH test |
| r-back-ankle__Average_Hei    | 0days | 3days  | 1          | ns | Repeat ANOVA + PH test |
| r-back-ankle__Movement       | 0days | 7days  | 1          | ns | Repeat ANOVA + PH test |
| r-back-ankle__Movement       | 0days | 3days  | 1          | ns | Repeat ANOVA + PH test |
| r-back-toe__Average_Heigh    | 0days | 21days | 1          | ns | Repeat ANOVA + PH test |
| r-back-toe__Average_Heigh    | 0days | 14days | 1          | ns | Repeat ANOVA + PH test |

|                              |       |        |      |                        |
|------------------------------|-------|--------|------|------------------------|
| r-back-toe__Average_Heigh    | 0days | 7days  | 1 ns | Repeat ANOVA + PH test |
| r-back-toe__Average_Heigh    | 0days | 3days  | 1 ns | Repeat ANOVA + PH test |
| r-elbow__Average_Height      | 0days | 3days  | 1 ns | Repeat ANOVA + PH test |
| r-elbow__Average_Height      | 0days | 14days | 1 ns | Repeat ANOVA + PH test |
| r-elbow__Average_Height      | 0days | 7days  | 1 ns | Repeat ANOVA + PH test |
| r-elbow__Average_Height      | 0days | 21days | 1 ns | Repeat ANOVA + PH test |
| r-front-toe-tip__Average_Hei | 0days | 3days  | 1 ns | Repeat ANOVA + PH test |
| r-front-toe-tip__Average_Hei | 0days | 7days  | 1 ns | Repeat ANOVA + PH test |
| r-front-toe-tip__Average_Hei | 0days | 14days | 1 ns | Repeat ANOVA + PH test |
| r-front-toe-tip__Average_Hei | 0days | 21days | 1 ns | Repeat ANOVA + PH test |
| r-front-toe-tip__Movement    | 0days | 3days  | 1 ns | Repeat ANOVA + PH test |
| r-front-toe-tip__Movement    | 0days | 21days | 1 ns | Repeat ANOVA + PH test |
| r-front-toe-tip__Movement    | 0days | 14days | 1 ns | Repeat ANOVA + PH test |
| r-front-toe-tip__Movement    | 0days | 7days  | 1 ns | Repeat ANOVA + PH test |
| r-head__Average_Height       | 0days | 3days  | 1 ns | Repeat ANOVA + PH test |
| r-head__Average_Height       | 0days | 7days  | 1 ns | Repeat ANOVA + PH test |
| r-head__Average_Height       | 0days | 14days | 1 ns | Repeat ANOVA + PH test |
| r-head__Average_Height       | 0days | 21days | 1 ns | Repeat ANOVA + PH test |
| r-hip__Average_Height        | 0days | 3days  | 1 ns | Repeat ANOVA + PH test |
| r-hip__Average_Height        | 0days | 7days  | 1 ns | Repeat ANOVA + PH test |
| r-hip__Average_Height        | 0days | 14days | 1 ns | Repeat ANOVA + PH test |
| r-hip__Average_Height        | 0days | 21days | 1 ns | Repeat ANOVA + PH test |
| r-hip__Movement              | 0days | 14days | 1 ns | Repeat ANOVA + PH test |
| r-hip__Movement              | 0days | 7days  | 1 ns | Repeat ANOVA + PH test |
| r-hip__Movement              | 0days | 21days | 1 ns | Repeat ANOVA + PH test |
| r-iliac-crest__Average_Heigl | 0days | 3days  | 1 ns | Repeat ANOVA + PH test |
| r-iliac-crest__Average_Heigl | 0days | 14days | 1 ns | Repeat ANOVA + PH test |
| r-iliac-crest__Average_Heigl | 0days | 7days  | 1 ns | Repeat ANOVA + PH test |
| r-iliac-crest__Average_Heigl | 0days | 21days | 1 ns | Repeat ANOVA + PH test |
| r-iliac-crest__Movement      | 0days | 14days | 1 ns | Repeat ANOVA + PH test |
| r-iliac-crest__Movement      | 0days | 21days | 1 ns | Repeat ANOVA + PH test |
| r-iliac-crest__Movement      | 0days | 7days  | 1 ns | Repeat ANOVA + PH test |
| r-shoulder__Average_Heigh    | 0days | 21days | 1 ns | Repeat ANOVA + PH test |
| r-shoulder__Average_Heigh    | 0days | 7days  | 1 ns | Repeat ANOVA + PH test |
| r-shoulder__Average_Heigh    | 0days | 14days | 1 ns | Repeat ANOVA + PH test |
| r-shoulder__Average_Heigh    | 0days | 3days  | 1 ns | Repeat ANOVA + PH test |
| r-wrist__Average_Height      | 0days | 7days  | 1 ns | Repeat ANOVA + PH test |
| r-wrist__Average_Height      | 0days | 21days | 1 ns | Repeat ANOVA + PH test |
| r-wrist__Average_Height      | 0days | 14days | 1 ns | Repeat ANOVA + PH test |
| r-wrist__Movement            | 0days | 7days  | 1 ns | Repeat ANOVA + PH test |
| r-wrist__Movement            | 0days | 14days | 1 ns | Repeat ANOVA + PH test |
| r-wrist__Movement            | 0days | 21days | 1 ns | Repeat ANOVA + PH test |

**Suppl. Table 22: Raw data side perspective horizontal analysis**

| <b>day</b> | <b>ID</b> | <b>Measure</b>      | <b>Length, mm</b> |
|------------|-----------|---------------------|-------------------|
| 0days      | ID_1      | left__back__average | -0.665732881      |
| 0days      | ID_2      | left__back__average | -2.43937031       |
| 0days      | ID_3      | left__back__average | -3.165219533      |
| 0days      | ID_4      | left__back__average | 2.780764825       |
| 0days      | ID_5      | left__back__average | -1.016136842      |
| 0days      | ID_6      | left__back__average | -0.11607343       |
| 0days      | ID_7      | left__back__average | 0.331419497       |
| 0days      | ID_8      | left__back__average | 0.998726988       |
| 0days      | ID_9      | left__back__average | 1.029317169       |
| 0days      | ID_10     | left__back__average | 1.439472752       |
| 0days      | ID_11     | left__back__average | -6.288500711      |
| 0days      | ID_12     | left__back__average | 0.790370464       |
| 0days      | ID_13     | left__back__average | 0                 |
| 3days      | ID_1      | left__back__average | -3.252123236      |
| 3days      | ID_2      | left__back__average | -0.693573233      |
| 3days      | ID_3      | left__back__average | -1.321642182      |
| 3days      | ID_4      | left__back__average | -4.446968622      |
| 3days      | ID_5      | left__back__average | -5.077335534      |
| 3days      | ID_6      | left__back__average | -2.322387965      |
| 3days      | ID_7      | left__back__average | 0.183361776       |
| 3days      | ID_8      | left__back__average | -0.502326708      |
| 7days      | ID_1      | left__back__average | -2.16032667       |
| 7days      | ID_2      | left__back__average | -2.015743425      |
| 7days      | ID_3      | left__back__average | -2.928351493      |
| 7days      | ID_4      | left__back__average | -2.23863132       |
| 7days      | ID_5      | left__back__average | -2.862697583      |
| 7days      | ID_6      | left__back__average | -2.712748448      |
| 7days      | ID_7      | left__back__average | -3.986746149      |
| 7days      | ID_8      | left__back__average | -1.923224411      |
| 7days      | ID_9      | left__back__average | -2.317728529      |
| 14days     | ID_1      | left__back__average | 0.323925364       |
| 14days     | ID_2      | left__back__average | -3.950857748      |
| 14days     | ID_3      | left__back__average | -2.796805228      |
| 14days     | ID_4      | left__back__average | -0.687508374      |
| 14days     | ID_5      | left__back__average | -0.947685938      |
| 14days     | ID_6      | left__back__average | -7.996255861      |
| 14days     | ID_7      | left__back__average | -1.453731628      |
| 14days     | ID_8      | left__back__average | -1.463413908      |
| 14days     | ID_9      | left__back__average | -0.913276722      |
| 14days     | ID_10     | left__back__average | -4.226148943      |
| 14days     | ID_11     | left__back__average | 1.900302369       |
| 21days     | ID_1      | left__back__average | -0.672312122      |
| 21days     | ID_2      | left__back__average | -0.248371865      |
| 21days     | ID_3      | left__back__average | -3.100045223      |
| 21days     | ID_4      | left__back__average | -0.890662024      |
| 21days     | ID_5      | left__back__average | 1.142253382       |

|        |       |                     |              |
|--------|-------|---------------------|--------------|
| 21days | ID_6  | left__back__average | 0.988501652  |
| 21days | ID_7  | left__back__average | 0.482267541  |
| 21days | ID_8  | left__back__average | 1.844449648  |
| 21days | ID_9  | left__back__average | 1.094912192  |
| 21days | ID_10 | left__back__average | -0.679299503 |
| 0days  | ID_1  | left__back__median  | -1.674089125 |
| 0days  | ID_2  | left__back__median  | -4.439980208 |
| 0days  | ID_3  | left__back__median  | -5.078559266 |
| 0days  | ID_4  | left__back__median  | 2.833925522  |
| 0days  | ID_5  | left__back__median  | -2.598521964 |
| 0days  | ID_6  | left__back__median  | -0.140126659 |
| 0days  | ID_7  | left__back__median  | 0            |
| 0days  | ID_8  | left__back__median  | 0.999616945  |
| 0days  | ID_9  | left__back__median  | 1.562406868  |
| 0days  | ID_10 | left__back__median  | 2.202879524  |
| 0days  | ID_11 | left__back__median  | -8.200006562 |
| 0days  | ID_12 | left__back__median  | 0.828872722  |
| 0days  | ID_13 | left__back__median  | 0.040724184  |
| 3days  | ID_1  | left__back__median  | -6.2651764   |
| 3days  | ID_2  | left__back__median  | -2.219129741 |
| 3days  | ID_3  | left__back__median  | -3.693438635 |
| 3days  | ID_4  | left__back__median  | -7.473039746 |
| 3days  | ID_5  | left__back__median  | -6.403805071 |
| 3days  | ID_6  | left__back__median  | -4.467193939 |
| 3days  | ID_7  | left__back__median  | 1.544503241  |
| 3days  | ID_8  | left__back__median  | -0.534412942 |
| 7days  | ID_1  | left__back__median  | -3.80758827  |
| 7days  | ID_2  | left__back__median  | -3.348074382 |
| 7days  | ID_3  | left__back__median  | -3.855174598 |
| 7days  | ID_4  | left__back__median  | -1.834017477 |
| 7days  | ID_5  | left__back__median  | -3.759343996 |
| 7days  | ID_6  | left__back__median  | -3.443448227 |
| 7days  | ID_7  | left__back__median  | -4.111624234 |
| 7days  | ID_8  | left__back__median  | -1.317366042 |
| 7days  | ID_9  | left__back__median  | -1.844135333 |
| 14days | ID_1  | left__back__median  | -0.695586301 |
| 14days | ID_2  | left__back__median  | -6.229323465 |
| 14days | ID_3  | left__back__median  | -4.933527567 |
| 14days | ID_4  | left__back__median  | -0.795866341 |
| 14days | ID_5  | left__back__median  | -1.176232972 |
| 14days | ID_6  | left__back__median  | -12.74506704 |
| 14days | ID_7  | left__back__median  | -1.659057825 |
| 14days | ID_8  | left__back__median  | -1.623890045 |
| 14days | ID_9  | left__back__median  | -3.03993928  |
| 14days | ID_10 | left__back__median  | -4.904743153 |
| 14days | ID_11 | left__back__median  | 2.441005261  |
| 21days | ID_1  | left__back__median  | -2.050191019 |
| 21days | ID_2  | left__back__median  | 0.448892446  |

|        |       |                         |              |
|--------|-------|-------------------------|--------------|
| 21days | ID_3  | left__back__median      | -4.139947609 |
| 21days | ID_4  | left__back__median      | -1.527488306 |
| 21days | ID_5  | left__back__median      | 1.802578924  |
| 21days | ID_6  | left__back__median      | 0.815885025  |
| 21days | ID_7  | left__back__median      | 1.306126126  |
| 21days | ID_8  | left__back__median      | 1.568666375  |
| 21days | ID_9  | left__back__median      | 0.326482619  |
| 21days | ID_10 | left__back__median      | -1.795462783 |
| 0days  | ID_1  | left__back__protraction | -1.007182427 |
| 0days  | ID_2  | left__back__protraction | -3.653931951 |
| 0days  | ID_3  | left__back__protraction | -2.141409021 |
| 0days  | ID_4  | left__back__protraction | 0.576821813  |
| 0days  | ID_5  | left__back__protraction | 0.309006776  |
| 0days  | ID_6  | left__back__protraction | 1.158577959  |
| 0days  | ID_7  | left__back__protraction | 0.596753465  |
| 0days  | ID_8  | left__back__protraction | -1.254364972 |
| 0days  | ID_9  | left__back__protraction | 0.226353945  |
| 0days  | ID_10 | left__back__protraction | 0            |
| 0days  | ID_11 | left__back__protraction | -4.147008126 |
| 0days  | ID_12 | left__back__protraction | 0.754228211  |
| 0days  | ID_13 | left__back__protraction | -0.60652709  |
| 3days  | ID_1  | left__back__protraction | -1.274293944 |
| 3days  | ID_2  | left__back__protraction | 0.096048212  |
| 3days  | ID_3  | left__back__protraction | -1.865729097 |
| 3days  | ID_4  | left__back__protraction | -1.979965267 |
| 3days  | ID_5  | left__back__protraction | -5.552383843 |
| 3days  | ID_6  | left__back__protraction | -1.237684327 |
| 3days  | ID_7  | left__back__protraction | -1.105148234 |
| 3days  | ID_8  | left__back__protraction | -0.442272116 |
| 7days  | ID_1  | left__back__protraction | -2.661670395 |
| 7days  | ID_2  | left__back__protraction | -3.245417491 |
| 7days  | ID_3  | left__back__protraction | -1.545360848 |
| 7days  | ID_4  | left__back__protraction | -2.447104324 |
| 7days  | ID_5  | left__back__protraction | -2.507040057 |
| 7days  | ID_6  | left__back__protraction | -2.07934681  |
| 7days  | ID_7  | left__back__protraction | -0.816228153 |
| 7days  | ID_8  | left__back__protraction | -1.485682354 |
| 7days  | ID_9  | left__back__protraction | -1.402951927 |
| 14days | ID_1  | left__back__protraction | -0.324161835 |
| 14days | ID_2  | left__back__protraction | -1.57424086  |
| 14days | ID_3  | left__back__protraction | -2.527734181 |
| 14days | ID_4  | left__back__protraction | -1.709245047 |
| 14days | ID_5  | left__back__protraction | -1.607006233 |
| 14days | ID_6  | left__back__protraction | -3.121501111 |
| 14days | ID_7  | left__back__protraction | -0.924197633 |
| 14days | ID_8  | left__back__protraction | -1.643220046 |
| 14days | ID_9  | left__back__protraction | -0.153902842 |
| 14days | ID_10 | left__back__protraction | -3.418664461 |

|        |       |                         |              |
|--------|-------|-------------------------|--------------|
| 14days | ID_11 | left__back__protraction | 2.046542141  |
| 21days | ID_1  | left__back__protraction | -0.24156792  |
| 21days | ID_2  | left__back__protraction | 1.626731032  |
| 21days | ID_3  | left__back__protraction | 0.851509272  |
| 21days | ID_4  | left__back__protraction | 0.064025612  |
| 21days | ID_5  | left__back__protraction | 1.261124624  |
| 21days | ID_6  | left__back__protraction | 0.445258176  |
| 21days | ID_7  | left__back__protraction | 0.348099895  |
| 21days | ID_8  | left__back__protraction | 0.664082467  |
| 21days | ID_9  | left__back__protraction | 0.599460844  |
| 21days | ID_10 | left__back__protraction | 0.506442497  |
| 0days  | ID_8  | left__back__retraction  | 1.210140798  |
| 0days  | ID_9  | left__back__retraction  | 0.02219099   |
| 0days  | ID_10 | left__back__retraction  | -1.162018988 |
| 0days  | ID_8  | left__back__retraction  | 3.017222757  |
| 0days  | ID_9  | left__back__retraction  | -1.27637061  |
| 0days  | ID_10 | left__back__retraction  | -1.538501377 |
| 0days  | ID_1  | left__back__retraction  | 0.12559081   |
| 0days  | ID_2  | left__back__retraction  | 3.889002621  |
| 0days  | ID_3  | left__back__retraction  | 1.010955045  |
| 0days  | ID_4  | left__back__retraction  | -0.341514206 |
| 0days  | ID_5  | left__back__retraction  | -8.110801699 |
| 0days  | ID_6  | left__back__retraction  | 0            |
| 0days  | ID_7  | left__back__retraction  | -0.57797182  |
| 3days  | ID_8  | left__back__retraction  | -2.819717048 |
| 3days  | ID_9  | left__back__retraction  | -0.135272303 |
| 3days  | ID_10 | left__back__retraction  | 0.460051372  |
| 3days  | ID_11 | left__back__retraction  | -2.545966881 |
| 3days  | ID_12 | left__back__retraction  | -2.757772999 |
| 3days  | ID_13 | left__back__retraction  | -1.293005832 |
| 3days  | ID_1  | left__back__retraction  | -1.836321935 |
| 3days  | ID_2  | left__back__retraction  | 1.001731981  |
| 7days  | ID_3  | left__back__retraction  | 0.13659226   |
| 7days  | ID_4  | left__back__retraction  | 0.549676978  |
| 7days  | ID_5  | left__back__retraction  | -3.194304685 |
| 7days  | ID_6  | left__back__retraction  | -2.038100464 |
| 7days  | ID_7  | left__back__retraction  | -2.368477429 |
| 7days  | ID_8  | left__back__retraction  | -2.694002504 |
| 7days  | ID_1  | left__back__retraction  | -6.256429814 |
| 7days  | ID_2  | left__back__retraction  | -4.775949884 |
| 7days  | ID_3  | left__back__retraction  | -1.625930648 |
| 14days | ID_4  | left__back__retraction  | 1.87976914   |
| 14days | ID_5  | left__back__retraction  | -2.587458199 |
| 14days | ID_6  | left__back__retraction  | -0.883775699 |
| 14days | ID_7  | left__back__retraction  | -1.009640645 |
| 14days | ID_8  | left__back__retraction  | -1.44399568  |
| 14days | ID_9  | left__back__retraction  | -8.1193916   |
| 14days | ID_1  | left__back__retraction  | -2.842384321 |

|        |       |                        |              |
|--------|-------|------------------------|--------------|
| 14days | ID_2  | left__back__retraction | -2.638135661 |
| 14days | ID_3  | left__back__retraction | 0.80479594   |
| 14days | ID_4  | left__back__retraction | -5.799396098 |
| 14days | ID_5  | left__back__retraction | -0.789313388 |
| 21days | ID_6  | left__back__retraction | 0.243836979  |
| 21days | ID_7  | left__back__retraction | -2.424044339 |
| 21days | ID_8  | left__back__retraction | -6.781224612 |
| 21days | ID_9  | left__back__retraction | -0.216298896 |
| 21days | ID_10 | left__back__retraction | -0.419762593 |
| 21days | ID_11 | left__back__retraction | -0.177530285 |
| 21days | ID_1  | left__back__retraction | -0.789324573 |
| 21days | ID_2  | left__back__retraction | 1.585602295  |
| 21days | ID_3  | left__back__retraction | 2.569213531  |
| 21days | ID_4  | left__back__retraction | -0.980244494 |
| 0days  | ID_1  | left__front__average   | -0.879607339 |
| 0days  | ID_2  | left__front__average   | -0.709980082 |
| 0days  | ID_3  | left__front__average   | 0            |
| 0days  | ID_4  | left__front__average   | 0.504144505  |
| 0days  | ID_5  | left__front__average   | -1.40961481  |
| 0days  | ID_6  | left__front__average   | -0.527251359 |
| 0days  | ID_7  | left__front__average   | 1.072535671  |
| 0days  | ID_8  | left__front__average   | 0.448437723  |
| 0days  | ID_9  | left__front__average   | 0.181167374  |
| 0days  | ID_10 | left__front__average   | -0.005719772 |
| 0days  | ID_11 | left__front__average   | -3.404842295 |
| 0days  | ID_12 | left__front__average   | 0.316464062  |
| 0days  | ID_13 | left__front__average   | 1.607013021  |
| 3days  | ID_1  | left__front__average   | -0.907181554 |
| 3days  | ID_2  | left__front__average   | -0.401869236 |
| 3days  | ID_3  | left__front__average   | 0.335036403  |
| 3days  | ID_4  | left__front__average   | -2.658869037 |
| 3days  | ID_5  | left__front__average   | -2.227689565 |
| 3days  | ID_6  | left__front__average   | -0.721798769 |
| 3days  | ID_7  | left__front__average   | 0.585521939  |
| 3days  | ID_8  | left__front__average   | -0.258398494 |
| 7days  | ID_1  | left__front__average   | 0.025801317  |
| 7days  | ID_2  | left__front__average   | -1.214567938 |
| 7days  | ID_3  | left__front__average   | -1.002909718 |
| 7days  | ID_4  | left__front__average   | -1.739412223 |
| 7days  | ID_5  | left__front__average   | 0.549012538  |
| 7days  | ID_6  | left__front__average   | -3.108332693 |
| 7days  | ID_7  | left__front__average   | -1.714345392 |
| 7days  | ID_8  | left__front__average   | 0.232114186  |
| 7days  | ID_9  | left__front__average   | -0.193090236 |
| 14days | ID_1  | left__front__average   | 1.910567496  |
| 14days | ID_2  | left__front__average   | 0.082685496  |
| 14days | ID_3  | left__front__average   | -1.241697683 |
| 14days | ID_4  | left__front__average   | -1.110237164 |

|        |       |                      |              |
|--------|-------|----------------------|--------------|
| 14days | ID_5  | left__front__average | -0.247411429 |
| 14days | ID_6  | left__front__average | -1.310406232 |
| 14days | ID_7  | left__front__average | -1.554612921 |
| 14days | ID_8  | left__front__average | -1.724099018 |
| 14days | ID_9  | left__front__average | 0.254252606  |
| 14days | ID_10 | left__front__average | 0.237044329  |
| 14days | ID_11 | left__front__average | 0.660205908  |
| 21days | ID_1  | left__front__average | -0.540968367 |
| 21days | ID_2  | left__front__average | -0.860216841 |
| 21days | ID_3  | left__front__average | -1.483103708 |
| 21days | ID_4  | left__front__average | 0.362900494  |
| 21days | ID_5  | left__front__average | -0.284639455 |
| 21days | ID_6  | left__front__average | -3.403529073 |
| 21days | ID_7  | left__front__average | 0.910377542  |
| 21days | ID_8  | left__front__average | -0.930189315 |
| 21days | ID_9  | left__front__average | -1.665121787 |
| 21days | ID_10 | left__front__average | 0.083718823  |
| 0days  | ID_1  | left__front__median  | -0.850321644 |
| 0days  | ID_2  | left__front__median  | 0            |
| 0days  | ID_3  | left__front__median  | 0.281198903  |
| 0days  | ID_4  | left__front__median  | 0.15545647   |
| 0days  | ID_5  | left__front__median  | -1.272624197 |
| 0days  | ID_6  | left__front__median  | -0.915424142 |
| 0days  | ID_7  | left__front__median  | 0.927347784  |
| 0days  | ID_8  | left__front__median  | 1.163047102  |
| 0days  | ID_9  | left__front__median  | -1.034528229 |
| 0days  | ID_10 | left__front__median  | -0.029419574 |
| 0days  | ID_11 | left__front__median  | -4.107992567 |
| 0days  | ID_12 | left__front__median  | 0.239413114  |
| 0days  | ID_13 | left__front__median  | 2.592267089  |
| 3days  | ID_1  | left__front__median  | -0.958318096 |
| 3days  | ID_2  | left__front__median  | -1.267064368 |
| 3days  | ID_3  | left__front__median  | -1.021439728 |
| 3days  | ID_4  | left__front__median  | -2.699232424 |
| 3days  | ID_5  | left__front__median  | -2.323193601 |
| 3days  | ID_6  | left__front__median  | -1.015288122 |
| 3days  | ID_7  | left__front__median  | 0.995621417  |
| 3days  | ID_8  | left__front__median  | -0.428999883 |
| 7days  | ID_1  | left__front__median  | -0.332171623 |
| 7days  | ID_2  | left__front__median  | -0.318934555 |
| 7days  | ID_3  | left__front__median  | -0.968282335 |
| 7days  | ID_4  | left__front__median  | -0.770697385 |
| 7days  | ID_5  | left__front__median  | 0.724418545  |
| 7days  | ID_6  | left__front__median  | -3.629760179 |
| 7days  | ID_7  | left__front__median  | -1.833860047 |
| 7days  | ID_8  | left__front__median  | 0.629543459  |
| 7days  | ID_9  | left__front__median  | 1.712253759  |
| 14days | ID_1  | left__front__median  | 2.191838668  |



|        |       |                          |              |
|--------|-------|--------------------------|--------------|
| 14days | ID_2  | left__front__median      | -0.120205915 |
| 14days | ID_3  | left__front__median      | -0.697275341 |
| 14days | ID_4  | left__front__median      | -1.74039099  |
| 14days | ID_5  | left__front__median      | 0.386450839  |
| 14days | ID_6  | left__front__median      | -1.765467357 |
| 14days | ID_7  | left__front__median      | -1.946032421 |
| 14days | ID_8  | left__front__median      | -1.83085407  |
| 14days | ID_9  | left__front__median      | 0.234359659  |
| 14days | ID_10 | left__front__median      | 0.771166045  |
| 14days | ID_11 | left__front__median      | 0.782629212  |
| 21days | ID_1  | left__front__median      | -0.75497561  |
| 21days | ID_2  | left__front__median      | -1.1884572   |
| 21days | ID_3  | left__front__median      | -1.419486097 |
| 21days | ID_4  | left__front__median      | -0.349997282 |
| 21days | ID_5  | left__front__median      | -0.828709842 |
| 21days | ID_6  | left__front__median      | -4.917535076 |
| 21days | ID_7  | left__front__median      | 2.072451757  |
| 21days | ID_8  | left__front__median      | -0.071091841 |
| 21days | ID_9  | left__front__median      | -2.686558747 |
| 21days | ID_10 | left__front__median      | 0.053536251  |
| 0days  | ID_1  | left__front__protraction | -0.431356953 |
| 0days  | ID_2  | left__front__protraction | -2.219015636 |
| 0days  | ID_3  | left__front__protraction | -0.255317951 |
| 0days  | ID_4  | left__front__protraction | 0            |
| 0days  | ID_5  | left__front__protraction | 0.094228582  |
| 0days  | ID_6  | left__front__protraction | 1.451605376  |
| 0days  | ID_7  | left__front__protraction | 1.151527795  |
| 0days  | ID_8  | left__front__protraction | -1.429568036 |
| 0days  | ID_9  | left__front__protraction | 1.495405382  |
| 0days  | ID_10 | left__front__protraction | -0.122580362 |
| 0days  | ID_11 | left__front__protraction | -1.54287188  |
| 0days  | ID_12 | left__front__protraction | 0.769433412  |
| 0days  | ID_13 | left__front__protraction | 1.832993513  |
| 3days  | ID_1  | left__front__protraction | 0.909095638  |
| 3days  | ID_2  | left__front__protraction | 1.372744342  |
| 3days  | ID_3  | left__front__protraction | 1.438993147  |
| 3days  | ID_4  | left__front__protraction | -2.392774837 |
| 3days  | ID_5  | left__front__protraction | -1.703263852 |
| 3days  | ID_6  | left__front__protraction | -0.216873025 |
| 3days  | ID_7  | left__front__protraction | 0.550482385  |
| 3days  | ID_8  | left__front__protraction | 0.289721795  |
| 7days  | ID_1  | left__front__protraction | 0.172296956  |
| 7days  | ID_2  | left__front__protraction | -1.681786091 |
| 7days  | ID_3  | left__front__protraction | 0.198160508  |
| 7days  | ID_4  | left__front__protraction | -0.937126705 |
| 7days  | ID_5  | left__front__protraction | -0.315310416 |
| 7days  | ID_6  | left__front__protraction | -1.431788271 |
| 7days  | ID_7  | left__front__protraction | 1.069687936  |

|        |       |                          |              |
|--------|-------|--------------------------|--------------|
| 7days  | ID_8  | left__front__protraction | 0.72263386   |
| 7days  | ID_9  | left__front__protraction | -0.315511619 |
| 14days | ID_1  | left__front__protraction | 0.154797216  |
| 14days | ID_2  | left__front__protraction | 1.708096434  |
| 14days | ID_3  | left__front__protraction | -2.185781336 |
| 14days | ID_4  | left__front__protraction | 0.065733988  |
| 14days | ID_5  | left__front__protraction | 0.617927104  |
| 14days | ID_6  | left__front__protraction | 0.325474586  |
| 14days | ID_7  | left__front__protraction | 0.869700545  |
| 14days | ID_8  | left__front__protraction | 1.07357953   |
| 14days | ID_9  | left__front__protraction | 0.432166648  |
| 14days | ID_10 | left__front__protraction | 1.361641015  |
| 14days | ID_11 | left__front__protraction | 1.624899738  |
| 21days | ID_1  | left__front__protraction | -0.984004383 |
| 21days | ID_2  | left__front__protraction | 1.04709775   |
| 21days | ID_3  | left__front__protraction | 1.55130306   |
| 21days | ID_4  | left__front__protraction | 1.78538358   |
| 21days | ID_5  | left__front__protraction | 1.463509028  |
| 21days | ID_6  | left__front__protraction | -1.253657421 |
| 21days | ID_7  | left__front__protraction | 1.223119841  |
| 21days | ID_8  | left__front__protraction | 0.735382676  |
| 21days | ID_9  | left__front__protraction | 0.537097742  |
| 21days | ID_10 | left__front__protraction | 1.588416205  |
| 0days  | ID_1  | left__front__retraction  | -0.449184075 |
| 0days  | ID_2  | left__front__retraction  | 0.032254181  |
| 0days  | ID_3  | left__front__retraction  | 0.243039985  |
| 0days  | ID_4  | left__front__retraction  | 0.394707929  |
| 0days  | ID_5  | left__front__retraction  | -3.266687878 |
| 0days  | ID_6  | left__front__retraction  | -2.29195909  |
| 0days  | ID_7  | left__front__retraction  | 0            |
| 0days  | ID_8  | left__front__retraction  | 2.031415473  |
| 0days  | ID_9  | left__front__retraction  | -0.332777796 |
| 0days  | ID_10 | left__front__retraction  | 0.089530468  |
| 0days  | ID_11 | left__front__retraction  | -4.599697686 |
| 0days  | ID_12 | left__front__retraction  | -1.017194709 |
| 0days  | ID_13 | left__front__retraction  | 0.094253216  |
| 3days  | ID_1  | left__front__retraction  | -3.503634286 |
| 3days  | ID_2  | left__front__retraction  | -1.644096679 |
| 3days  | ID_3  | left__front__retraction  | 0.518083081  |
| 3days  | ID_4  | left__front__retraction  | -3.413815571 |
| 3days  | ID_5  | left__front__retraction  | -2.765435548 |
| 3days  | ID_6  | left__front__retraction  | -1.516642635 |
| 3days  | ID_7  | left__front__retraction  | -0.328488286 |
| 3days  | ID_8  | left__front__retraction  | -1.219683644 |
| 7days  | ID_1  | left__front__retraction  | -0.311802376 |
| 7days  | ID_2  | left__front__retraction  | -0.796664338 |
| 7days  | ID_3  | left__front__retraction  | -2.146841945 |
| 7days  | ID_4  | left__front__retraction  | -2.380134239 |

|        |       |                         |              |
|--------|-------|-------------------------|--------------|
| 7days  | ID_5  | left__front__retraction | -0.074984075 |
| 7days  | ID_6  | left__front__retraction | -4.494462827 |
| 7days  | ID_7  | left__front__retraction | -5.45622217  |
| 7days  | ID_8  | left__front__retraction | -0.965980117 |
| 7days  | ID_9  | left__front__retraction | -2.086637506 |
| 14days | ID_1  | left__front__retraction | 2.140659653  |
| 14days | ID_2  | left__front__retraction | -1.73669188  |
| 14days | ID_3  | left__front__retraction | -0.430918492 |
| 14days | ID_4  | left__front__retraction | -1.647172503 |
| 14days | ID_5  | left__front__retraction | -2.652616405 |
| 14days | ID_6  | left__front__retraction | -2.955103925 |
| 14days | ID_7  | left__front__retraction | -2.613589569 |
| 14days | ID_8  | left__front__retraction | -4.162630955 |
| 14days | ID_9  | left__front__retraction | -0.28831661  |
| 14days | ID_10 | left__front__retraction | 0.024024928  |
| 14days | ID_11 | left__front__retraction | -1.671537507 |
| 21days | ID_1  | left__front__retraction | -0.2012184   |
| 21days | ID_2  | left__front__retraction | -2.696259895 |
| 21days | ID_3  | left__front__retraction | -5.184760652 |
| 21days | ID_4  | left__front__retraction | -0.499028704 |
| 21days | ID_5  | left__front__retraction | -0.968420668 |
| 21days | ID_6  | left__front__retraction | -3.540820983 |
| 21days | ID_7  | left__front__retraction | -2.347366179 |
| 21days | ID_8  | left__front__retraction | -2.202341262 |
| 21days | ID_9  | left__front__retraction | -1.636486244 |
| 21days | ID_10 | left__front__retraction | -1.354557853 |
| 0days  | ID_1  | right__back__average    | -1.220707321 |
| 0days  | ID_2  | right__back__average    | 0            |
| 0days  | ID_3  | right__back__average    | -2.597076385 |
| 0days  | ID_4  | right__back__average    | -0.108458564 |
| 0days  | ID_5  | right__back__average    | -1.584014298 |
| 0days  | ID_6  | right__back__average    | -0.16124635  |
| 0days  | ID_7  | right__back__average    | 2.241302811  |
| 0days  | ID_8  | right__back__average    | 5.920478421  |
| 0days  | ID_9  | right__back__average    | 0.89439213   |
| 0days  | ID_10 | right__back__average    | 2.723608993  |
| 0days  | ID_11 | right__back__average    | -2.645229343 |
| 0days  | ID_12 | right__back__average    | 1.305643589  |
| 0days  | ID_13 | right__back__average    | 0.691280553  |
| 3days  | ID_1  | right__back__average    | -4.532717748 |
| 3days  | ID_2  | right__back__average    | -3.159389207 |
| 3days  | ID_3  | right__back__average    | -3.361433109 |
| 3days  | ID_4  | right__back__average    | -2.602608926 |
| 3days  | ID_5  | right__back__average    | -1.691631756 |
| 3days  | ID_6  | right__back__average    | -1.028984944 |
| 3days  | ID_7  | right__back__average    | -0.954060279 |
| 3days  | ID_8  | right__back__average    | 1.085135535  |
| 7days  | ID_1  | right__back__average    | -0.944070368 |

|        |       |                      |              |
|--------|-------|----------------------|--------------|
| 7days  | ID_2  | right__back__average | 0.427358733  |
| 7days  | ID_3  | right__back__average | -0.487637607 |
| 7days  | ID_4  | right__back__average | 2.39815611   |
| 7days  | ID_5  | right__back__average | 0.701435722  |
| 7days  | ID_6  | right__back__average | 2.165795863  |
| 7days  | ID_7  | right__back__average | -2.410576257 |
| 7days  | ID_8  | right__back__average | 0.774297871  |
| 7days  | ID_9  | right__back__average | -0.245413339 |
| 14days | ID_1  | right__back__average | -1.060872574 |
| 14days | ID_2  | right__back__average | -2.184781052 |
| 14days | ID_3  | right__back__average | 1.943203888  |
| 14days | ID_4  | right__back__average | 2.568507429  |
| 14days | ID_5  | right__back__average | 0.612213986  |
| 14days | ID_6  | right__back__average | -3.290772364 |
| 14days | ID_7  | right__back__average | -0.006108082 |
| 14days | ID_8  | right__back__average | -0.037379197 |
| 14days | ID_9  | right__back__average | 1.848193881  |
| 14days | ID_10 | right__back__average | 2.666578077  |
| 14days | ID_11 | right__back__average | 2.549472541  |
| 21days | ID_1  | right__back__average | -0.78674041  |
| 21days | ID_2  | right__back__average | 0.931724259  |
| 21days | ID_3  | right__back__average | 0.975036331  |
| 21days | ID_4  | right__back__average | 2.303445472  |
| 21days | ID_5  | right__back__average | 1.324666077  |
| 21days | ID_6  | right__back__average | 2.533424963  |
| 21days | ID_7  | right__back__average | 3.006823535  |
| 21days | ID_8  | right__back__average | 0.58944103   |
| 21days | ID_9  | right__back__average | 1.727858666  |
| 21days | ID_10 | right__back__average | 1.771106012  |
| 0days  | ID_1  | right__back__median  | -1.830371539 |
| 0days  | ID_2  | right__back__median  | -1.312863594 |
| 0days  | ID_3  | right__back__median  | -3.319817877 |
| 0days  | ID_4  | right__back__median  | -0.469532213 |
| 0days  | ID_5  | right__back__median  | -1.245295153 |
| 0days  | ID_6  | right__back__median  | 0            |
| 0days  | ID_7  | right__back__median  | 2.680109103  |
| 0days  | ID_8  | right__back__median  | 6.497710752  |
| 0days  | ID_9  | right__back__median  | 0.790934626  |
| 0days  | ID_10 | right__back__median  | 2.968405315  |
| 0days  | ID_11 | right__back__median  | -3.894430257 |
| 0days  | ID_12 | right__back__median  | 0.788309133  |
| 0days  | ID_13 | right__back__median  | 0.520071148  |
| 3days  | ID_1  | right__back__median  | -6.962627438 |
| 3days  | ID_2  | right__back__median  | -4.178970217 |
| 3days  | ID_3  | right__back__median  | -4.405582381 |
| 3days  | ID_4  | right__back__median  | -3.12863867  |
| 3days  | ID_5  | right__back__median  | -3.626008271 |
| 3days  | ID_6  | right__back__median  | -2.320210661 |

|        |       |                          |              |
|--------|-------|--------------------------|--------------|
| 3days  | ID_7  | right__back__median      | -0.367657838 |
| 3days  | ID_8  | right__back__median      | 2.149825638  |
| 7days  | ID_1  | right__back__median      | -0.520040288 |
| 7days  | ID_2  | right__back__median      | 0.56389815   |
| 7days  | ID_3  | right__back__median      | -0.903462467 |
| 7days  | ID_4  | right__back__median      | 2.806679172  |
| 7days  | ID_5  | right__back__median      | 0.640917201  |
| 7days  | ID_6  | right__back__median      | 4.375360868  |
| 7days  | ID_7  | right__back__median      | 0.258314772  |
| 7days  | ID_8  | right__back__median      | 1.74841411   |
| 7days  | ID_9  | right__back__median      | 1.949187482  |
| 14days | ID_1  | right__back__median      | -1.336873786 |
| 14days | ID_2  | right__back__median      | -3.613745458 |
| 14days | ID_3  | right__back__median      | 2.698669552  |
| 14days | ID_4  | right__back__median      | 3.631003844  |
| 14days | ID_5  | right__back__median      | 2.291049403  |
| 14days | ID_6  | right__back__median      | -4.093526801 |
| 14days | ID_7  | right__back__median      | 2.034673739  |
| 14days | ID_8  | right__back__median      | 1.972429748  |
| 14days | ID_9  | right__back__median      | 2.663750211  |
| 14days | ID_10 | right__back__median      | 4.397476978  |
| 14days | ID_11 | right__back__median      | 2.572437652  |
| 21days | ID_1  | right__back__median      | -0.792845149 |
| 21days | ID_2  | right__back__median      | 0.734144003  |
| 21days | ID_3  | right__back__median      | 0.862819433  |
| 21days | ID_4  | right__back__median      | 4.263139462  |
| 21days | ID_5  | right__back__median      | 2.315868584  |
| 21days | ID_6  | right__back__median      | 3.80544907   |
| 21days | ID_7  | right__back__median      | 3.04927329   |
| 21days | ID_8  | right__back__median      | 2.234963897  |
| 21days | ID_9  | right__back__median      | 3.362991192  |
| 21days | ID_10 | right__back__median      | 1.786609545  |
| 0days  | ID_1  | right__back__protraction | -1.421076867 |
| 0days  | ID_2  | right__back__protraction | -0.500102876 |
| 0days  | ID_3  | right__back__protraction | -2.286100223 |
| 0days  | ID_4  | right__back__protraction | 0            |
| 0days  | ID_5  | right__back__protraction | -0.220407759 |
| 0days  | ID_6  | right__back__protraction | 0.881491698  |
| 0days  | ID_7  | right__back__protraction | 2.694013764  |
| 0days  | ID_8  | right__back__protraction | 2.882976574  |
| 0days  | ID_9  | right__back__protraction | -0.369787074 |
| 0days  | ID_10 | right__back__protraction | 3.616231241  |
| 0days  | ID_11 | right__back__protraction | -0.380579943 |
| 0days  | ID_12 | right__back__protraction | 1.778413854  |
| 0days  | ID_13 | right__back__protraction | 1.553195225  |
| 3days  | ID_1  | right__back__protraction | -2.588404577 |
| 3days  | ID_2  | right__back__protraction | -3.125251707 |
| 3days  | ID_3  | right__back__protraction | -4.376133131 |

|        |       |                          |              |
|--------|-------|--------------------------|--------------|
| 3days  | ID_4  | right__back__protraction | -2.631863487 |
| 3days  | ID_5  | right__back__protraction | 0.606737611  |
| 3days  | ID_6  | right__back__protraction | -0.779698286 |
| 3days  | ID_7  | right__back__protraction | 0.891683823  |
| 3days  | ID_8  | right__back__protraction | 2.392053499  |
| 7days  | ID_1  | right__back__protraction | -1.466488182 |
| 7days  | ID_2  | right__back__protraction | 0.32045122   |
| 7days  | ID_3  | right__back__protraction | -0.011322923 |
| 7days  | ID_4  | right__back__protraction | 2.701702383  |
| 7days  | ID_5  | right__back__protraction | 1.246791091  |
| 7days  | ID_6  | right__back__protraction | 3.823594072  |
| 7days  | ID_7  | right__back__protraction | -0.242853724 |
| 7days  | ID_8  | right__back__protraction | 1.711197726  |
| 7days  | ID_9  | right__back__protraction | 0.846442875  |
| 14days | ID_1  | right__back__protraction | -1.938068344 |
| 14days | ID_2  | right__back__protraction | -1.865193    |
| 14days | ID_3  | right__back__protraction | 1.435711494  |
| 14days | ID_4  | right__back__protraction | 2.083280655  |
| 14days | ID_5  | right__back__protraction | 1.251088937  |
| 14days | ID_6  | right__back__protraction | -0.011532146 |
| 14days | ID_7  | right__back__protraction | 0.883791713  |
| 14days | ID_8  | right__back__protraction | 1.507829887  |
| 14days | ID_9  | right__back__protraction | 3.836127713  |
| 14days | ID_10 | right__back__protraction | 2.288746274  |
| 14days | ID_11 | right__back__protraction | 1.804490211  |
| 21days | ID_1  | right__back__protraction | 0.275301351  |
| 21days | ID_2  | right__back__protraction | 2.943302486  |
| 21days | ID_3  | right__back__protraction | 3.205936847  |
| 21days | ID_4  | right__back__protraction | 3.620898837  |
| 21days | ID_5  | right__back__protraction | 3.365270743  |
| 21days | ID_6  | right__back__protraction | 2.508306541  |
| 21days | ID_7  | right__back__protraction | 3.022708311  |
| 21days | ID_8  | right__back__protraction | 2.153404345  |
| 21days | ID_9  | right__back__protraction | 1.172660773  |
| 21days | ID_10 | right__back__protraction | 2.371177014  |
| 0days  | ID_1  | right__back__retraction  | 0            |
| 0days  | ID_2  | right__back__retraction  | 1.416050016  |
| 0days  | ID_3  | right__back__retraction  | -1.957660531 |
| 0days  | ID_4  | right__back__retraction  | -1.984040499 |
| 0days  | ID_5  | right__back__retraction  | -3.312804411 |
| 0days  | ID_6  | right__back__retraction  | -1.960314377 |
| 0days  | ID_7  | right__back__retraction  | 1.678681237  |
| 0days  | ID_8  | right__back__retraction  | 7.073698638  |
| 0days  | ID_9  | right__back__retraction  | 0.849269889  |
| 0days  | ID_10 | right__back__retraction  | 0.812162463  |
| 0days  | ID_11 | right__back__retraction  | -2.742840295 |
| 0days  | ID_12 | right__back__retraction  | 1.100014994  |
| 0days  | ID_13 | right__back__retraction  | -0.055768991 |

|        |       |                         |              |
|--------|-------|-------------------------|--------------|
| 3days  | ID_1  | right__back__retraction | -3.686972257 |
| 3days  | ID_2  | right__back__retraction | -2.869935908 |
| 3days  | ID_3  | right__back__retraction | -0.972749326 |
| 3days  | ID_4  | right__back__retraction | -2.255567001 |
| 3days  | ID_5  | right__back__retraction | -2.232078302 |
| 3days  | ID_6  | right__back__retraction | -0.681708899 |
| 3days  | ID_7  | right__back__retraction | -5.12461956  |
| 3days  | ID_8  | right__back__retraction | -1.350775104 |
| 7days  | ID_1  | right__back__retraction | -0.58724218  |
| 7days  | ID_2  | right__back__retraction | 0.787624248  |
| 7days  | ID_3  | right__back__retraction | -0.183581407 |
| 7days  | ID_4  | right__back__retraction | 1.530287351  |
| 7days  | ID_5  | right__back__retraction | -0.393741324 |
| 7days  | ID_6  | right__back__retraction | -2.962342971 |
| 7days  | ID_7  | right__back__retraction | -5.638722507 |
| 7days  | ID_8  | right__back__retraction | -2.386434933 |
| 7days  | ID_9  | right__back__retraction | -5.308127703 |
| 14days | ID_1  | right__back__retraction | -0.207466585 |
| 14days | ID_2  | right__back__retraction | -2.561717823 |
| 14days | ID_3  | right__back__retraction | 1.112462825  |
| 14days | ID_4  | right__back__retraction | 1.014349941  |
| 14days | ID_5  | right__back__retraction | -3.386940034 |
| 14days | ID_6  | right__back__retraction | -6.122774698 |
| 14days | ID_7  | right__back__retraction | -4.125879163 |
| 14days | ID_8  | right__back__retraction | -3.498621284 |
| 14days | ID_9  | right__back__retraction | -1.131703461 |
| 14days | ID_10 | right__back__retraction | -0.959433361 |
| 14days | ID_11 | right__back__retraction | 1.274775143  |
| 21days | ID_1  | right__back__retraction | 0.054960709  |
| 21days | ID_2  | right__back__retraction | -0.958421751 |
| 21days | ID_3  | right__back__retraction | -1.723538194 |
| 21days | ID_4  | right__back__retraction | -0.415421186 |
| 21days | ID_5  | right__back__retraction | -1.936323889 |
| 21days | ID_6  | right__back__retraction | -0.430320046 |
| 21days | ID_7  | right__back__retraction | 1.544883197  |
| 21days | ID_8  | right__back__retraction | -2.939745193 |
| 21days | ID_9  | right__back__retraction | -1.126855587 |
| 21days | ID_10 | right__back__retraction | 0.324875024  |
| 0days  | ID_1  | right__front__average   | -0.414956268 |
| 0days  | ID_2  | right__front__average   | -0.129620843 |
| 0days  | ID_3  | right__front__average   | 0.021914097  |
| 0days  | ID_4  | right__front__average   | 0.504541113  |
| 0days  | ID_5  | right__front__average   | -1.859685875 |
| 0days  | ID_6  | right__front__average   | -0.652199165 |
| 0days  | ID_7  | right__front__average   | 1.289240568  |
| 0days  | ID_8  | right__front__average   | 1.10557979   |
| 0days  | ID_9  | right__front__average   | 0.415070213  |
| 0days  | ID_10 | right__front__average   | -3.017275615 |

|        |       |                       |              |
|--------|-------|-----------------------|--------------|
| 0days  | ID_11 | right__front__average | -0.70525656  |
| 0days  | ID_12 | right__front__average | 0            |
| 0days  | ID_13 | right__front__average | 0.936034643  |
| 3days  | ID_1  | right__front__average | -1.847480913 |
| 3days  | ID_2  | right__front__average | -1.006830148 |
| 3days  | ID_3  | right__front__average | -0.519916629 |
| 3days  | ID_4  | right__front__average | -2.375509092 |
| 3days  | ID_5  | right__front__average | -1.133696988 |
| 3days  | ID_6  | right__front__average | -1.479573856 |
| 3days  | ID_7  | right__front__average | -1.795672612 |
| 3days  | ID_8  | right__front__average | 0.225308201  |
| 7days  | ID_1  | right__front__average | 0.03472778   |
| 7days  | ID_2  | right__front__average | 0.042579331  |
| 7days  | ID_3  | right__front__average | -2.374681633 |
| 7days  | ID_4  | right__front__average | -0.817392494 |
| 7days  | ID_5  | right__front__average | -2.633270102 |
| 7days  | ID_6  | right__front__average | -1.599808714 |
| 7days  | ID_7  | right__front__average | -1.862385246 |
| 7days  | ID_8  | right__front__average | -2.367818189 |
| 7days  | ID_9  | right__front__average | -1.35271496  |
| 14days | ID_1  | right__front__average | 1.3860377    |
| 14days | ID_2  | right__front__average | -2.395939268 |
| 14days | ID_3  | right__front__average | 0.305387048  |
| 14days | ID_4  | right__front__average | -1.726435765 |
| 14days | ID_5  | right__front__average | -2.023496358 |
| 14days | ID_6  | right__front__average | -3.476992686 |
| 14days | ID_7  | right__front__average | -1.318233544 |
| 14days | ID_8  | right__front__average | -1.365925182 |
| 14days | ID_9  | right__front__average | -0.455525058 |
| 14days | ID_10 | right__front__average | -0.109342186 |
| 14days | ID_11 | right__front__average | 0.568691943  |
| 21days | ID_1  | right__front__average | -0.16368815  |
| 21days | ID_2  | right__front__average | -3.077911527 |
| 21days | ID_3  | right__front__average | -3.423564686 |
| 21days | ID_4  | right__front__average | 0.697291126  |
| 21days | ID_5  | right__front__average | -3.322927206 |
| 21days | ID_6  | right__front__average | -0.251843726 |
| 21days | ID_7  | right__front__average | -1.335368763 |
| 21days | ID_8  | right__front__average | 0.031217492  |
| 21days | ID_9  | right__front__average | -0.198973876 |
| 21days | ID_10 | right__front__average | -0.798304955 |
| 0days  | ID_1  | right__front__median  | -0.168571973 |
| 0days  | ID_2  | right__front__median  | -0.826783694 |
| 0days  | ID_3  | right__front__median  | -0.385938075 |
| 0days  | ID_4  | right__front__median  | 0.431279483  |
| 0days  | ID_5  | right__front__median  | -1.101756862 |
| 0days  | ID_6  | right__front__median  | 0.5611322    |
| 0days  | ID_7  | right__front__median  | 1.315754519  |



|        |       |                           |              |
|--------|-------|---------------------------|--------------|
| 0days  | ID_8  | right__front__median      | 0.366439149  |
| 0days  | ID_9  | right__front__median      | 1.503179119  |
| 0days  | ID_10 | right__front__median      | -2.93875279  |
| 0days  | ID_11 | right__front__median      | -1.669213039 |
| 0days  | ID_12 | right__front__median      | 0            |
| 0days  | ID_13 | right__front__median      | 1.570389115  |
| 3days  | ID_1  | right__front__median      | -2.416762596 |
| 3days  | ID_2  | right__front__median      | -1.391173985 |
| 3days  | ID_3  | right__front__median      | -0.744887037 |
| 3days  | ID_4  | right__front__median      | -3.806978384 |
| 3days  | ID_5  | right__front__median      | -2.725821269 |
| 3days  | ID_6  | right__front__median      | -3.085073207 |
| 3days  | ID_7  | right__front__median      | -1.90808633  |
| 3days  | ID_8  | right__front__median      | 1.319839772  |
| 7days  | ID_1  | right__front__median      | 0.017742105  |
| 7days  | ID_2  | right__front__median      | -0.909505354 |
| 7days  | ID_3  | right__front__median      | -3.417498827 |
| 7days  | ID_4  | right__front__median      | -1.868867582 |
| 7days  | ID_5  | right__front__median      | -4.705078082 |
| 7days  | ID_6  | right__front__median      | -3.174683055 |
| 7days  | ID_7  | right__front__median      | -2.608414205 |
| 7days  | ID_8  | right__front__median      | -3.375109376 |
| 7days  | ID_9  | right__front__median      | -0.989122911 |
| 14days | ID_1  | right__front__median      | 1.42538104   |
| 14days | ID_2  | right__front__median      | -4.247891766 |
| 14days | ID_3  | right__front__median      | -0.431757111 |
| 14days | ID_4  | right__front__median      | -2.746476822 |
| 14days | ID_5  | right__front__median      | -2.517615182 |
| 14days | ID_6  | right__front__median      | -4.421366903 |
| 14days | ID_7  | right__front__median      | -2.217291703 |
| 14days | ID_8  | right__front__median      | -2.385538486 |
| 14days | ID_9  | right__front__median      | -0.035296915 |
| 14days | ID_10 | right__front__median      | 0.673202659  |
| 14days | ID_11 | right__front__median      | -0.211709649 |
| 21days | ID_1  | right__front__median      | -0.234139268 |
| 21days | ID_2  | right__front__median      | -4.916247242 |
| 21days | ID_3  | right__front__median      | -4.778671159 |
| 21days | ID_4  | right__front__median      | 0.80778347   |
| 21days | ID_5  | right__front__median      | -5.618115113 |
| 21days | ID_6  | right__front__median      | -0.706095552 |
| 21days | ID_7  | right__front__median      | -1.9772455   |
| 21days | ID_8  | right__front__median      | 0.147007758  |
| 21days | ID_9  | right__front__median      | 0.13535427   |
| 21days | ID_10 | right__front__median      | -1.132010508 |
| 0days  | ID_1  | right__front__protraction | -1.512247084 |
| 0days  | ID_2  | right__front__protraction | 0            |
| 0days  | ID_3  | right__front__protraction | -0.329057487 |
| 0days  | ID_4  | right__front__protraction | 0.189957542  |

|        |       |                           |              |
|--------|-------|---------------------------|--------------|
| 0days  | ID_5  | right__front__protraction | -1.519248755 |
| 0days  | ID_6  | right__front__protraction | -0.757627436 |
| 0days  | ID_7  | right__front__protraction | 1.766036297  |
| 0days  | ID_8  | right__front__protraction | 0.089914395  |
| 0days  | ID_9  | right__front__protraction | -0.782273392 |
| 0days  | ID_10 | right__front__protraction | -1.977281229 |
| 0days  | ID_11 | right__front__protraction | 0.124241544  |
| 0days  | ID_12 | right__front__protraction | 0.812229566  |
| 0days  | ID_13 | right__front__protraction | 1.385868305  |
| 3days  | ID_1  | right__front__protraction | -0.012704658 |
| 3days  | ID_2  | right__front__protraction | -0.154354055 |
| 3days  | ID_3  | right__front__protraction | -0.407589008 |
| 3days  | ID_4  | right__front__protraction | -0.755500501 |
| 3days  | ID_5  | right__front__protraction | 0.164153271  |
| 3days  | ID_6  | right__front__protraction | -0.439168329 |
| 3days  | ID_7  | right__front__protraction | -0.94982165  |
| 3days  | ID_8  | right__front__protraction | -1.08244552  |
| 7days  | ID_1  | right__front__protraction | -0.976820236 |
| 7days  | ID_2  | right__front__protraction | 0.183013131  |
| 7days  | ID_3  | right__front__protraction | -1.375000616 |
| 7days  | ID_4  | right__front__protraction | 0.225423235  |
| 7days  | ID_5  | right__front__protraction | -1.557079569 |
| 7days  | ID_6  | right__front__protraction | 0.996728966  |
| 7days  | ID_7  | right__front__protraction | -1.045804756 |
| 7days  | ID_8  | right__front__protraction | 0.608472236  |
| 7days  | ID_9  | right__front__protraction | -1.928753953 |
| 14days | ID_1  | right__front__protraction | -0.236254125 |
| 14days | ID_2  | right__front__protraction | -1.52548254  |
| 14days | ID_3  | right__front__protraction | 0.279243327  |
| 14days | ID_4  | right__front__protraction | 0.412871035  |
| 14days | ID_5  | right__front__protraction | -0.935036379 |
| 14days | ID_6  | right__front__protraction | -1.142357874 |
| 14days | ID_7  | right__front__protraction | 1.62375621   |
| 14days | ID_8  | right__front__protraction | 0.960321015  |
| 14days | ID_9  | right__front__protraction | -1.384088641 |
| 14days | ID_10 | right__front__protraction | 1.544552256  |
| 14days | ID_11 | right__front__protraction | 2.948871686  |
| 21days | ID_1  | right__front__protraction | -0.4977671   |
| 21days | ID_2  | right__front__protraction | -1.257713203 |
| 21days | ID_3  | right__front__protraction | -0.595169044 |
| 21days | ID_4  | right__front__protraction | 1.832973045  |
| 21days | ID_5  | right__front__protraction | -0.476463466 |
| 21days | ID_6  | right__front__protraction | 0.927586227  |
| 21days | ID_7  | right__front__protraction | -0.590027022 |
| 21days | ID_8  | right__front__protraction | 1.68678415   |
| 21days | ID_9  | right__front__protraction | 0.159135913  |
| 21days | ID_10 | right__front__protraction | 1.020922517  |
| 0days  | ID_1  | right__front__retraction  | -0.93066662  |

|        |       |                          |              |
|--------|-------|--------------------------|--------------|
| 0days  | ID_2  | right__front__retraction | 0.44705624   |
| 0days  | ID_3  | right__front__retraction | -0.60513673  |
| 0days  | ID_4  | right__front__retraction | 0.58771033   |
| 0days  | ID_5  | right__front__retraction | -3.259730399 |
| 0days  | ID_6  | right__front__retraction | -2.044834264 |
| 0days  | ID_7  | right__front__retraction | 1.03871289   |
| 0days  | ID_8  | right__front__retraction | 1.992417761  |
| 0days  | ID_9  | right__front__retraction | 0            |
| 0days  | ID_10 | right__front__retraction | -2.937163791 |
| 0days  | ID_11 | right__front__retraction | 0.203480725  |
| 0days  | ID_12 | right__front__retraction | -0.215854572 |
| 0days  | ID_13 | right__front__retraction | 0.294718757  |
| 3days  | ID_1  | right__front__retraction | -2.038213048 |
| 3days  | ID_2  | right__front__retraction | -0.407148309 |
| 3days  | ID_3  | right__front__retraction | 0.750361345  |
| 3days  | ID_4  | right__front__retraction | -2.18971475  |
| 3days  | ID_5  | right__front__retraction | -1.678337059 |
| 3days  | ID_6  | right__front__retraction | -0.37815693  |
| 3days  | ID_7  | right__front__retraction | -2.078306624 |
| 3days  | ID_8  | right__front__retraction | 1.173070963  |
| 7days  | ID_1  | right__front__retraction | 1.836241544  |
| 7days  | ID_2  | right__front__retraction | 0.752301178  |
| 7days  | ID_3  | right__front__retraction | -1.538627901 |
| 7days  | ID_4  | right__front__retraction | -1.651799997 |
| 7days  | ID_5  | right__front__retraction | -1.623444265 |
| 7days  | ID_6  | right__front__retraction | -4.187294494 |
| 7days  | ID_7  | right__front__retraction | -0.550974868 |
| 7days  | ID_8  | right__front__retraction | -3.731654882 |
| 7days  | ID_9  | right__front__retraction | -0.706718797 |
| 14days | ID_1  | right__front__retraction | 2.816010627  |
| 14days | ID_2  | right__front__retraction | -1.488736399 |
| 14days | ID_3  | right__front__retraction | 0.471879453  |
| 14days | ID_4  | right__front__retraction | -2.837391993 |
| 14days | ID_5  | right__front__retraction | -3.58770493  |
| 14days | ID_6  | right__front__retraction | -4.199274051 |
| 14days | ID_7  | right__front__retraction | -2.868433603 |
| 14days | ID_8  | right__front__retraction | -2.479819801 |
| 14days | ID_9  | right__front__retraction | 0.870701604  |
| 14days | ID_10 | right__front__retraction | -2.344768186 |
| 14days | ID_11 | right__front__retraction | -0.964389038 |
| 21days | ID_1  | right__front__retraction | 0.92750539   |
| 21days | ID_2  | right__front__retraction | -3.021517049 |
| 21days | ID_3  | right__front__retraction | -4.12117692  |
| 21days | ID_4  | right__front__retraction | -0.895782426 |
| 21days | ID_5  | right__front__retraction | -3.664846613 |
| 21days | ID_6  | right__front__retraction | -1.429468384 |
| 21days | ID_7  | right__front__retraction | -1.27661404  |
| 21days | ID_8  | right__front__retraction | -1.132579016 |

|              |                          |              |
|--------------|--------------------------|--------------|
| 21days ID_9  | right__front__retraction | -1.847145473 |
| 21days ID_10 | right__front__retraction | -1.66798754  |

---

**Suppl. Table 23: Summary of side perspective horizontal analysis**

| day   | Measure         | Mean         | SD          |
|-------|-----------------|--------------|-------------|
| 0days | left__back__a   | 0            | 2.354541209 |
| 0days | left__back__b   | 0            | 3.227139569 |
| 0days | left__back__c   | 0            | 1.69170068  |
| 0days | left__back__d   | 0            | 2.846657111 |
| 0days | left__front__a  | 0            | 1.253349506 |
| 0days | left__front__b  | 0            | 1.570427129 |
| 0days | left__front__c  | 0            | 1.264781286 |
| 0days | left__front__d  | 0            | 1.743007692 |
| 0days | right__back__a  | 0            | 2.344531176 |
| 0days | right__back__b  | 0            | 2.77491306  |
| 0days | right__back__c  | 0            | 1.770511725 |
| 0days | right__back__d  | 0            | 2.700298056 |
| 0days | right__front__a | 0            | 1.203423662 |
| 0days | right__front__b | 0            | 1.305458505 |
| 0days | right__front__c | 0            | 1.12076202  |
| 0days | right__front__d | 0            | 1.5320941   |
| 3days | left__back__a   | -1.822015073 | 1.929090297 |
| 3days | left__back__b   | -4.080316287 | 3.126680302 |
| 3days | left__back__c   | -1.255989136 | 1.71114298  |
| 3days | left__back__d   | -1.564663883 | 1.511813249 |
| 3days | left__front__a  | -0.561834002 | 1.144458372 |
| 3days | left__front__b  | -1.018363925 | 1.131125044 |
| 3days | left__front__c  | 0.42010209   | 1.405823096 |
| 3days | left__front__d  | -1.580369657 | 1.433498932 |
| 3days | right__back__a  | -2.147120341 | 1.757349752 |
| 3days | right__back__b  | -3.377323471 | 2.757335366 |
| 3days | right__back__c  | -1.684051431 | 2.344941218 |
| 3days | right__back__d  | -2.243822651 | 1.485169903 |
| 3days | right__front__a | -1.306635422 | 0.824263826 |
| 3days | right__front__b | -2.162424463 | 1.600281066 |
| 3days | right__front__c | -0.423378668 | 0.447325136 |
| 3days | right__front__d | -1.042742684 | 1.33491689  |
| 7days | left__back__a   | -2.317728529 | 0.643078789 |
| 7days | left__back__b   | -3.443448227 | 1.062367573 |
| 7days | left__back__c   | -2.07934681  | 0.764617288 |
| 7days | left__back__d   | -2.368477429 | 2.152067839 |
| 7days | left__front__a  | -1.002909718 | 1.17748234  |
| 7days | left__front__b  | -0.332171623 | 1.564770365 |
| 7days | left__front__c  | -0.315310416 | 0.934484209 |
| 7days | left__front__d  | -2.086637506 | 1.84924638  |
| 7days | right__back__a  | 0.427358733  | 1.503626524 |
| 7days | right__back__b  | 0.640917201  | 1.677492813 |
| 7days | right__back__c  | 0.846442875  | 1.603551536 |
| 7days | right__back__d  | -0.58724218  | 2.560789847 |
| 7days | right__front__a | -1.599808714 | 1.008113666 |

|        |                |              |             |
|--------|----------------|--------------|-------------|
| 7days  | right__front__ | -2.608414205 | 1.510248011 |
| 7days  | right__front__ | -0.976820236 | 1.054519984 |
| 7days  | right__front__ | -1.538627901 | 1.919825549 |
| 14days | left__back__   | -1.453731628 | 2.656271657 |
| 14days | left__back__   | -1.659057825 | 3.988066508 |
| 14days | left__back__   | -1.607006233 | 1.527604957 |
| 14days | left__back__   | -1.443995568 | 2.82983814  |
| 14days | left__front__  | -0.247411429 | 1.125586933 |
| 14days | left__front__  | -0.120205915 | 1.368714832 |
| 14days | left__front__  | 0.617927104  | 1.07125209  |
| 14days | left__front__  | -1.671537507 | 1.733422223 |
| 14days | right__back__  | 0.612213986  | 2.040695014 |
| 14days | right__back__  | 2.291049403  | 2.872608367 |
| 14days | right__back__  | 1.435711494  | 1.729372995 |
| 14days | right__back__  | -1.131703461 | 2.439141909 |
| 14days | right__front__ | -1.318233544 | 1.44321152  |
| 14days | right__front__ | -2.217291703 | 1.953600325 |
| 14days | right__front__ | 0.279243327  | 1.441428049 |
| 14days | right__front__ | -2.344768186 | 2.130770982 |
| 21days | left__back__   | 0.116947838  | 1.433482162 |
| 21days | left__back__   | 0.387687533  | 1.950397104 |
| 21days | left__back__   | 0.55295167   | 0.542495908 |
| 21days | left__back__   | -0.318030745 | 2.525711836 |
| 21days | left__front__  | -0.700592604 | 1.220282587 |
| 21days | left__front__  | -0.791842726 | 1.835661276 |
| 21days | left__front__  | 1.135108796  | 1.069862785 |
| 21days | left__front__  | -1.919413753 | 1.499065916 |
| 21days | right__back__  | 1.526262371  | 1.093320778 |
| 21days | right__back__  | 2.275416241  | 1.562512757 |
| 21days | right__back__  | 2.725804514  | 1.043927813 |
| 21days | right__back__  | -0.694370898 | 1.274467572 |
| 21days | right__front__ | -0.52507434  | 1.536426947 |
| 21days | right__front__ | -0.91905303  | 2.394837165 |
| 21days | right__front__ | -0.158663776 | 1.075149523 |
| 21days | right__front__ | -1.548727962 | 1.471551016 |

**Suppl. Table 24: Statistical test of bside perspective horizontal analysis**

| <b>Measur group1</b> | <b>group2</b> | <b>p.adj</b> | <b>sig</b> | <b>Test*</b>           |
|----------------------|---------------|--------------|------------|------------------------|
| right__b: 0days      | 3days         | 0.001853114  | **         | Repeat ANOVA + PH test |
| left__bac 0days      | 3days         | 0.008909729  | **         | Repeat ANOVA + PH test |
| right__b: 0days      | 3days         | 0.016891748  | *          | Repeat ANOVA + PH test |
| left__bac 0days      | 14days        | 0.017744158  | *          | Repeat ANOVA + PH test |
| right__b: 0days      | 3days         | 0.017941213  | *          | Repeat ANOVA + PH test |
| right__fr 0days      | 7days         | 0.029066542  | *          | Repeat ANOVA + PH test |
| left__bac 0days      | 7days         | 0.034047886  | *          | Repeat ANOVA + PH test |
| left__bac 0days      | 7days         | 0.034277897  | *          | Repeat ANOVA + PH test |
| right__b: 0days      | 21days        | 0.040234352  | *          | Repeat ANOVA + PH test |
| left__bac 0days      | 7days         | 0.048678422  | *          | Repeat ANOVA + PH test |
| left__bac 0days      | 14days        | 0.057031105  | *          | Repeat ANOVA + PH test |
| right__b: 0days      | 7days         | 0.075050598  | *          | Repeat ANOVA + PH test |
| right__b: 0days      | 14days        | 0.075050598  | *          | Repeat ANOVA + PH test |
| right__b: 0days      | 21days        | 0.092891088  | *          | Repeat ANOVA + PH test |
| right__fr 0days      | 3days         | 0.097701518  | *          | Repeat ANOVA + PH test |
| right__fr 0days      | 14days        | 0.097701518  | *          | Repeat ANOVA + PH test |
| right__fr 0days      | 21days        | 0.097701518  | *          | Repeat ANOVA + PH test |
| right__b: 0days      | 3days         | 0.099814864  | *          | Repeat ANOVA + PH test |
| left__bac 0days      | 3days         | 0.148248421  | ns         | Repeat ANOVA + PH test |
| left__bac 0days      | 14days        | 0.148248421  | ns         | Repeat ANOVA + PH test |
| right__b: 0days      | 21days        | 0.302434764  | ns         | Repeat ANOVA + PH test |
| right__fr 0days      | 21days        | 0.334110592  | ns         | Repeat ANOVA + PH test |
| left__fror 0days     | 7days         | 0.361568073  | ns         | Repeat ANOVA + PH test |
| left__fror 0days     | 21days        | 0.361568073  | ns         | Repeat ANOVA + PH test |
| left__bac 0days      | 21days        | 0.367291339  | ns         | Repeat ANOVA + PH test |
| right__b: 0days      | 7days         | 0.375270127  | ns         | Repeat ANOVA + PH test |
| right__b: 0days      | 14days        | 0.375270127  | ns         | Repeat ANOVA + PH test |
| left__bac 0days      | 7days         | 0.406980531  | ns         | Repeat ANOVA + PH test |
| left__bac 0days      | 21days        | 0.406980531  | ns         | Repeat ANOVA + PH test |
| left__fror 0days     | 3days         | 0.457508352  | ns         | Repeat ANOVA + PH test |
| left__fror 0days     | 14days        | 0.457508352  | ns         | Repeat ANOVA + PH test |
| right__fr 0days      | 14days        | 0.492138568  | ns         | Repeat ANOVA + PH test |
| left__bac 0days      | 3days         | 0.526400626  | ns         | Repeat ANOVA + PH test |
| left__bac 0days      | 14days        | 0.526400626  | ns         | Repeat ANOVA + PH test |
| left__bac 0days      | 3days         | 0.536024904  | ns         | Repeat ANOVA + PH test |
| right__fr 0days      | 7days         | 0.53778735   | ns         | Repeat ANOVA + PH test |
| left__bac 0days      | 21days        | 0.549397538  | ns         | Repeat ANOVA + PH test |
| left__bac 0days      | 21days        | 0.574923688  | ns         | Repeat ANOVA + PH test |
| right__fr 0days      | 3days         | 0.613412544  | ns         | Repeat ANOVA + PH test |
| right__fr 0days      | 7days         | 0.613412544  | ns         | Repeat ANOVA + PH test |
| right__b: 0days      | 21days        | 0.620197338  | ns         | Repeat ANOVA + PH test |
| right__fr 0days      | 3days         | 0.655804103  | ns         | Repeat ANOVA + PH test |
| right__fr 0days      | 14days        | 0.655804103  | ns         | Repeat ANOVA + PH test |
| right__fr 0days      | 21days        | 0.655804103  | ns         | Repeat ANOVA + PH test |
| left__fror 0days     | 3days         |              | 1 ns       | Repeat ANOVA + PH test |

|                  |        |      |                        |
|------------------|--------|------|------------------------|
| left__fror 0days | 7days  | 1 ns | Repeat ANOVA + PH test |
| left__fror 0days | 14days | 1 ns | Repeat ANOVA + PH test |
| left__fror 0days | 21days | 1 ns | Repeat ANOVA + PH test |
| left__fror 0days | 3days  | 1 ns | Repeat ANOVA + PH test |
| left__fror 0days | 7days  | 1 ns | Repeat ANOVA + PH test |
| left__fror 0days | 14days | 1 ns | Repeat ANOVA + PH test |
| left__fror 0days | 21days | 1 ns | Repeat ANOVA + PH test |
| left__fror 0days | 3days  | 1 ns | Repeat ANOVA + PH test |
| left__fror 0days | 7days  | 1 ns | Repeat ANOVA + PH test |
| left__fror 0days | 14days | 1 ns | Repeat ANOVA + PH test |
| left__fror 0days | 21days | 1 ns | Repeat ANOVA + PH test |
| right__b: 0days  | 7days  | 1 ns | Repeat ANOVA + PH test |
| right__b: 0days  | 14days | 1 ns | Repeat ANOVA + PH test |
| right__b: 0days  | 7days  | 1 ns | Repeat ANOVA + PH test |
| right__b: 0days  | 14days | 1 ns | Repeat ANOVA + PH test |
| right__fr 0days  | 3days  | 1 ns | Repeat ANOVA + PH test |
| right__fr 0days  | 7days  | 1 ns | Repeat ANOVA + PH test |
| right__fr 0days  | 14days | 1 ns | Repeat ANOVA + PH test |
| right__fr 0days  | 21days | 1 ns | Repeat ANOVA + PH test |



**Suppl. Table 25: Raw data side perspective horizontal angles analysis**

| day    | ID    | Measure                                | Angle, °    |
|--------|-------|----------------------------------------|-------------|
| 0days  | ID_1  | avg_Angle__left__back__hip__ankle__toe | 114.1670397 |
| 0days  | ID_2  | avg_Angle__left__back__hip__ankle__toe | 120.1753257 |
| 0days  | ID_3  | avg_Angle__left__back__hip__ankle__toe | 102.0163458 |
| 0days  | ID_4  | avg_Angle__left__back__hip__ankle__toe | 111.8714042 |
| 0days  | ID_5  | avg_Angle__left__back__hip__ankle__toe | 109.0708804 |
| 0days  | ID_6  | avg_Angle__left__back__hip__ankle__toe | 130.7947873 |
| 0days  | ID_7  | avg_Angle__left__back__hip__ankle__toe | 117.6747812 |
| 0days  | ID_8  | avg_Angle__left__back__hip__ankle__toe | 130.0793998 |
| 0days  | ID_9  | avg_Angle__left__back__hip__ankle__toe | 116.1412727 |
| 0days  | ID_10 | avg_Angle__left__back__hip__ankle__toe | 117.8603151 |
| 0days  | ID_11 | avg_Angle__left__back__hip__ankle__toe | 128.3921617 |
| 0days  | ID_12 | avg_Angle__left__back__hip__ankle__toe | 125.9447653 |
| 0days  | ID_13 | avg_Angle__left__back__hip__ankle__toe | 124.2589827 |
| 3days  | ID_1  | avg_Angle__left__back__hip__ankle__toe | 117.7780998 |
| 3days  | ID_2  | avg_Angle__left__back__hip__ankle__toe | 109.0184176 |
| 3days  | ID_3  | avg_Angle__left__back__hip__ankle__toe | 106.8257991 |
| 3days  | ID_4  | avg_Angle__left__back__hip__ankle__toe | 118.9717829 |
| 3days  | ID_5  | avg_Angle__left__back__hip__ankle__toe | 121.5482061 |
| 3days  | ID_6  | avg_Angle__left__back__hip__ankle__toe | 120.6246118 |
| 3days  | ID_7  | avg_Angle__left__back__hip__ankle__toe | 104.2305844 |
| 3days  | ID_8  | avg_Angle__left__back__hip__ankle__toe | 127.5396905 |
| 7days  | ID_1  | avg_Angle__left__back__hip__ankle__toe | 109.4231579 |
| 7days  | ID_2  | avg_Angle__left__back__hip__ankle__toe | 106.9625165 |
| 7days  | ID_3  | avg_Angle__left__back__hip__ankle__toe | 109.1608043 |
| 7days  | ID_4  | avg_Angle__left__back__hip__ankle__toe | 122.5989211 |
| 7days  | ID_5  | avg_Angle__left__back__hip__ankle__toe | 109.2314524 |
| 7days  | ID_6  | avg_Angle__left__back__hip__ankle__toe | 122.5098544 |
| 7days  | ID_7  | avg_Angle__left__back__hip__ankle__toe | 107.4999364 |
| 7days  | ID_8  | avg_Angle__left__back__hip__ankle__toe | 118.1545642 |
| 7days  | ID_9  | avg_Angle__left__back__hip__ankle__toe | 111.0962299 |
| 14days | ID_1  | avg_Angle__left__back__hip__ankle__toe | 105.6096997 |
| 14days | ID_2  | avg_Angle__left__back__hip__ankle__toe | 106.5926892 |
| 14days | ID_3  | avg_Angle__left__back__hip__ankle__toe | 116.7620652 |
| 14days | ID_4  | avg_Angle__left__back__hip__ankle__toe | 107.810918  |
| 14days | ID_5  | avg_Angle__left__back__hip__ankle__toe | 107.584073  |
| 14days | ID_6  | avg_Angle__left__back__hip__ankle__toe | 109.015013  |
| 14days | ID_7  | avg_Angle__left__back__hip__ankle__toe | 121.4844352 |
| 14days | ID_8  | avg_Angle__left__back__hip__ankle__toe | 132.0615907 |
| 14days | ID_9  | avg_Angle__left__back__hip__ankle__toe | 118.3741866 |
| 14days | ID_10 | avg_Angle__left__back__hip__ankle__toe | 116.3048084 |
| 14days | ID_11 | avg_Angle__left__back__hip__ankle__toe | 116.3657691 |
| 21days | ID_1  | avg_Angle__left__back__hip__ankle__toe | 121.3778167 |
| 21days | ID_2  | avg_Angle__left__back__hip__ankle__toe | 120.9414171 |
| 21days | ID_3  | avg_Angle__left__back__hip__ankle__toe | 117.2057509 |
| 21days | ID_4  | avg_Angle__left__back__hip__ankle__toe | 109.018637  |
| 21days | ID_5  | avg_Angle__left__back__hip__ankle__toe | 110.2264305 |

|        |       |                                        |             |
|--------|-------|----------------------------------------|-------------|
| 21days | ID_6  | avg_Angle__left__back__hip_ankle_toe   | 110.245508  |
| 21days | ID_7  | avg_Angle__left__back__hip_ankle_toe   | 115.0626434 |
| 21days | ID_8  | avg_Angle__left__back__hip_ankle_toe   | 132.4976511 |
| 21days | ID_9  | avg_Angle__left__back__hip_ankle_toe   | 125.3111799 |
| 21days | ID_10 | avg_Angle__left__back__hip_ankle_toe   | 130.1877934 |
| 0days  | ID_1  | avg_Angle__left__back__iliac_hip_ankle | 135.0505341 |
| 0days  | ID_2  | avg_Angle__left__back__iliac_hip_ankle | 135.5793202 |
| 0days  | ID_3  | avg_Angle__left__back__iliac_hip_ankle | 144.4318321 |
| 0days  | ID_4  | avg_Angle__left__back__iliac_hip_ankle | 135.7760854 |
| 0days  | ID_5  | avg_Angle__left__back__iliac_hip_ankle | 133.371106  |
| 0days  | ID_6  | avg_Angle__left__back__iliac_hip_ankle | 138.2339967 |
| 0days  | ID_7  | avg_Angle__left__back__iliac_hip_ankle | 142.3933013 |
| 0days  | ID_8  | avg_Angle__left__back__iliac_hip_ankle | 143.1065826 |
| 0days  | ID_9  | avg_Angle__left__back__iliac_hip_ankle | 131.2486022 |
| 0days  | ID_10 | avg_Angle__left__back__iliac_hip_ankle | 141.9465582 |
| 0days  | ID_11 | avg_Angle__left__back__iliac_hip_ankle | 155.9406815 |
| 0days  | ID_12 | avg_Angle__left__back__iliac_hip_ankle | 127.003597  |
| 0days  | ID_13 | avg_Angle__left__back__iliac_hip_ankle | 130.4798667 |
| 3days  | ID_1  | avg_Angle__left__back__iliac_hip_ankle | 131.4994529 |
| 3days  | ID_2  | avg_Angle__left__back__iliac_hip_ankle | 137.002001  |
| 3days  | ID_3  | avg_Angle__left__back__iliac_hip_ankle | 170.6036914 |
| 3days  | ID_4  | avg_Angle__left__back__iliac_hip_ankle | 139.9021649 |
| 3days  | ID_5  | avg_Angle__left__back__iliac_hip_ankle | 145.1201929 |
| 3days  | ID_6  | avg_Angle__left__back__iliac_hip_ankle | 163.3106646 |
| 3days  | ID_7  | avg_Angle__left__back__iliac_hip_ankle | 157.2863115 |
| 3days  | ID_8  | avg_Angle__left__back__iliac_hip_ankle | 145.5540685 |
| 7days  | ID_1  | avg_Angle__left__back__iliac_hip_ankle | 148.901809  |
| 7days  | ID_2  | avg_Angle__left__back__iliac_hip_ankle | 138.5188622 |
| 7days  | ID_3  | avg_Angle__left__back__iliac_hip_ankle | 141.9063018 |
| 7days  | ID_4  | avg_Angle__left__back__iliac_hip_ankle | 145.9886662 |
| 7days  | ID_5  | avg_Angle__left__back__iliac_hip_ankle | 148.6831878 |
| 7days  | ID_6  | avg_Angle__left__back__iliac_hip_ankle | 145.1924703 |
| 7days  | ID_7  | avg_Angle__left__back__iliac_hip_ankle | 146.1507297 |
| 7days  | ID_8  | avg_Angle__left__back__iliac_hip_ankle | 147.2430243 |
| 7days  | ID_9  | avg_Angle__left__back__iliac_hip_ankle | 139.1611706 |
| 14days | ID_1  | avg_Angle__left__back__iliac_hip_ankle | 139.9935782 |
| 14days | ID_2  | avg_Angle__left__back__iliac_hip_ankle | 138.3982793 |
| 14days | ID_3  | avg_Angle__left__back__iliac_hip_ankle | 171.7831316 |
| 14days | ID_4  | avg_Angle__left__back__iliac_hip_ankle | 136.8134784 |
| 14days | ID_5  | avg_Angle__left__back__iliac_hip_ankle | 137.8729391 |
| 14days | ID_6  | avg_Angle__left__back__iliac_hip_ankle | 144.0741428 |
| 14days | ID_7  | avg_Angle__left__back__iliac_hip_ankle | 138.5934962 |
| 14days | ID_8  | avg_Angle__left__back__iliac_hip_ankle | 147.2877546 |
| 14days | ID_9  | avg_Angle__left__back__iliac_hip_ankle | 150.289629  |
| 14days | ID_10 | avg_Angle__left__back__iliac_hip_ankle | 143.6005744 |
| 14days | ID_11 | avg_Angle__left__back__iliac_hip_ankle | 127.0132765 |
| 21days | ID_1  | avg_Angle__left__back__iliac_hip_ankle | 145.752007  |
| 21days | ID_2  | avg_Angle__left__back__iliac_hip_ankle | 134.3066689 |

|        |       |                                            |             |
|--------|-------|--------------------------------------------|-------------|
| 21days | ID_3  | avg_Angle__left__back__iliac_hip_ankle     | 131.6968323 |
| 21days | ID_4  | avg_Angle__left__back__iliac_hip_ankle     | 134.7369823 |
| 21days | ID_5  | avg_Angle__left__back__iliac_hip_ankle     | 132.8104309 |
| 21days | ID_6  | avg_Angle__left__back__iliac_hip_ankle     | 138.8536897 |
| 21days | ID_7  | avg_Angle__left__back__iliac_hip_ankle     | 138.2547258 |
| 21days | ID_8  | avg_Angle__left__back__iliac_hip_ankle     | 135.402751  |
| 21days | ID_9  | avg_Angle__left__back__iliac_hip_ankle     | 137.5116714 |
| 21days | ID_10 | avg_Angle__left__back__iliac_hip_ankle     | 138.3122277 |
| 0days  | ID_1  | avg_Angle__left__front__elbow_wrist_toetip | 144.2891192 |
| 0days  | ID_2  | avg_Angle__left__front__elbow_wrist_toetip | 151.1045287 |
| 0days  | ID_3  | avg_Angle__left__front__elbow_wrist_toetip | 141.0231684 |
| 0days  | ID_4  | avg_Angle__left__front__elbow_wrist_toetip | 140.8208984 |
| 0days  | ID_5  | avg_Angle__left__front__elbow_wrist_toetip | 149.9373826 |
| 0days  | ID_6  | avg_Angle__left__front__elbow_wrist_toetip | 144.0921415 |
| 0days  | ID_7  | avg_Angle__left__front__elbow_wrist_toetip | 142.3731221 |
| 0days  | ID_8  | avg_Angle__left__front__elbow_wrist_toetip | 146.789637  |
| 0days  | ID_9  | avg_Angle__left__front__elbow_wrist_toetip | 145.8770071 |
| 0days  | ID_10 | avg_Angle__left__front__elbow_wrist_toetip | 140.9206528 |
| 0days  | ID_11 | avg_Angle__left__front__elbow_wrist_toetip | 130.8326697 |
| 0days  | ID_12 | avg_Angle__left__front__elbow_wrist_toetip | 149.3871516 |
| 0days  | ID_13 | avg_Angle__left__front__elbow_wrist_toetip | 165.2511709 |
| 3days  | ID_1  | avg_Angle__left__front__elbow_wrist_toetip | 146.8133437 |
| 3days  | ID_2  | avg_Angle__left__front__elbow_wrist_toetip | 139.6066276 |
| 3days  | ID_3  | avg_Angle__left__front__elbow_wrist_toetip | 137.106981  |
| 3days  | ID_4  | avg_Angle__left__front__elbow_wrist_toetip | 134.1458412 |
| 3days  | ID_5  | avg_Angle__left__front__elbow_wrist_toetip | 148.8868582 |
| 3days  | ID_6  | avg_Angle__left__front__elbow_wrist_toetip | 121.7303035 |
| 3days  | ID_7  | avg_Angle__left__front__elbow_wrist_toetip | 131.7931426 |
| 3days  | ID_8  | avg_Angle__left__front__elbow_wrist_toetip | 137.0905538 |
| 7days  | ID_1  | avg_Angle__left__front__elbow_wrist_toetip | 139.3027937 |
| 7days  | ID_2  | avg_Angle__left__front__elbow_wrist_toetip | 152.1742211 |
| 7days  | ID_3  | avg_Angle__left__front__elbow_wrist_toetip | 148.1289414 |
| 7days  | ID_4  | avg_Angle__left__front__elbow_wrist_toetip | 142.5887226 |
| 7days  | ID_5  | avg_Angle__left__front__elbow_wrist_toetip | 133.3288446 |
| 7days  | ID_6  | avg_Angle__left__front__elbow_wrist_toetip | 139.6149882 |
| 7days  | ID_7  | avg_Angle__left__front__elbow_wrist_toetip | 136.1857868 |
| 7days  | ID_8  | avg_Angle__left__front__elbow_wrist_toetip | 153.7552099 |
| 7days  | ID_9  | avg_Angle__left__front__elbow_wrist_toetip | 135.4245809 |
| 14days | ID_1  | avg_Angle__left__front__elbow_wrist_toetip | 121.5699832 |
| 14days | ID_2  | avg_Angle__left__front__elbow_wrist_toetip | 125.4997733 |
| 14days | ID_3  | avg_Angle__left__front__elbow_wrist_toetip | 130.359543  |
| 14days | ID_4  | avg_Angle__left__front__elbow_wrist_toetip | 136.1223004 |
| 14days | ID_5  | avg_Angle__left__front__elbow_wrist_toetip | 132.2485372 |
| 14days | ID_6  | avg_Angle__left__front__elbow_wrist_toetip | 137.4785996 |
| 14days | ID_7  | avg_Angle__left__front__elbow_wrist_toetip | 149.7871871 |
| 14days | ID_8  | avg_Angle__left__front__elbow_wrist_toetip | 149.0367611 |
| 14days | ID_9  | avg_Angle__left__front__elbow_wrist_toetip | 132.8074463 |
| 14days | ID_10 | avg_Angle__left__front__elbow_wrist_toetip | 133.3898257 |

|        |       |                                           |             |
|--------|-------|-------------------------------------------|-------------|
| 14days | ID_11 | avg_Angle_left_front_elbow_wrist_toetip   | 135.5794195 |
| 21days | ID_1  | avg_Angle_left_front_elbow_wrist_toetip   | 134.826873  |
| 21days | ID_2  | avg_Angle_left_front_elbow_wrist_toetip   | 124.349755  |
| 21days | ID_3  | avg_Angle_left_front_elbow_wrist_toetip   | 148.4783237 |
| 21days | ID_4  | avg_Angle_left_front_elbow_wrist_toetip   | 121.3859247 |
| 21days | ID_5  | avg_Angle_left_front_elbow_wrist_toetip   | 151.7144917 |
| 21days | ID_6  | avg_Angle_left_front_elbow_wrist_toetip   | 127.5613641 |
| 21days | ID_7  | avg_Angle_left_front_elbow_wrist_toetip   | 126.4471065 |
| 21days | ID_8  | avg_Angle_left_front_elbow_wrist_toetip   | 141.4164273 |
| 21days | ID_9  | avg_Angle_left_front_elbow_wrist_toetip   | 144.2206726 |
| 21days | ID_10 | avg_Angle_left_front_elbow_wrist_toetip   | 145.2322498 |
| 0days  | ID_1  | avg_Angle_left_front_shoulder_elbow_wrist | 118.090206  |
| 0days  | ID_2  | avg_Angle_left_front_shoulder_elbow_wrist | 115.5624276 |
| 0days  | ID_3  | avg_Angle_left_front_shoulder_elbow_wrist | 137.0553127 |
| 0days  | ID_4  | avg_Angle_left_front_shoulder_elbow_wrist | 121.8632327 |
| 0days  | ID_5  | avg_Angle_left_front_shoulder_elbow_wrist | 115.7192397 |
| 0days  | ID_6  | avg_Angle_left_front_shoulder_elbow_wrist | 120.8249607 |
| 0days  | ID_7  | avg_Angle_left_front_shoulder_elbow_wrist | 118.5762272 |
| 0days  | ID_8  | avg_Angle_left_front_shoulder_elbow_wrist | 118.7520815 |
| 0days  | ID_9  | avg_Angle_left_front_shoulder_elbow_wrist | 116.9937495 |
| 0days  | ID_10 | avg_Angle_left_front_shoulder_elbow_wrist | 118.5028724 |
| 0days  | ID_11 | avg_Angle_left_front_shoulder_elbow_wrist | 129.1210117 |
| 0days  | ID_12 | avg_Angle_left_front_shoulder_elbow_wrist | 114.4313034 |
| 0days  | ID_13 | avg_Angle_left_front_shoulder_elbow_wrist | 121.3388142 |
| 3days  | ID_1  | avg_Angle_left_front_shoulder_elbow_wrist | 124.0229817 |
| 3days  | ID_2  | avg_Angle_left_front_shoulder_elbow_wrist | 126.3040495 |
| 3days  | ID_3  | avg_Angle_left_front_shoulder_elbow_wrist | 118.4023969 |
| 3days  | ID_4  | avg_Angle_left_front_shoulder_elbow_wrist | 124.0874927 |
| 3days  | ID_5  | avg_Angle_left_front_shoulder_elbow_wrist | 123.6507557 |
| 3days  | ID_6  | avg_Angle_left_front_shoulder_elbow_wrist | 127.5112357 |
| 3days  | ID_7  | avg_Angle_left_front_shoulder_elbow_wrist | 121.8592033 |
| 3days  | ID_8  | avg_Angle_left_front_shoulder_elbow_wrist | 121.9268735 |
| 7days  | ID_1  | avg_Angle_left_front_shoulder_elbow_wrist | 126.7409911 |
| 7days  | ID_2  | avg_Angle_left_front_shoulder_elbow_wrist | 108.3339656 |
| 7days  | ID_3  | avg_Angle_left_front_shoulder_elbow_wrist | 124.1091533 |
| 7days  | ID_4  | avg_Angle_left_front_shoulder_elbow_wrist | 122.2584768 |
| 7days  | ID_5  | avg_Angle_left_front_shoulder_elbow_wrist | 127.9885279 |
| 7days  | ID_6  | avg_Angle_left_front_shoulder_elbow_wrist | 117.9327268 |
| 7days  | ID_7  | avg_Angle_left_front_shoulder_elbow_wrist | 123.8393014 |
| 7days  | ID_8  | avg_Angle_left_front_shoulder_elbow_wrist | 116.0393596 |
| 7days  | ID_9  | avg_Angle_left_front_shoulder_elbow_wrist | 121.0498651 |
| 14days | ID_1  | avg_Angle_left_front_shoulder_elbow_wrist | 136.2185214 |
| 14days | ID_2  | avg_Angle_left_front_shoulder_elbow_wrist | 138.3342963 |
| 14days | ID_3  | avg_Angle_left_front_shoulder_elbow_wrist | 124.3993537 |
| 14days | ID_4  | avg_Angle_left_front_shoulder_elbow_wrist | 118.1238956 |
| 14days | ID_5  | avg_Angle_left_front_shoulder_elbow_wrist | 119.8397393 |
| 14days | ID_6  | avg_Angle_left_front_shoulder_elbow_wrist | 123.1079442 |
| 14days | ID_7  | avg_Angle_left_front_shoulder_elbow_wrist | 114.9154838 |

|        |       |                                           |             |
|--------|-------|-------------------------------------------|-------------|
| 14days | ID_8  | avg_Angle_left_front_shoulder_elbow_wrist | 112.221325  |
| 14days | ID_9  | avg_Angle_left_front_shoulder_elbow_wrist | 134.8577193 |
| 14days | ID_10 | avg_Angle_left_front_shoulder_elbow_wrist | 131.066123  |
| 14days | ID_11 | avg_Angle_left_front_shoulder_elbow_wrist | 128.6653096 |
| 21days | ID_1  | avg_Angle_left_front_shoulder_elbow_wrist | 118.5018086 |
| 21days | ID_2  | avg_Angle_left_front_shoulder_elbow_wrist | 134.9192923 |
| 21days | ID_3  | avg_Angle_left_front_shoulder_elbow_wrist | 119.6870298 |
| 21days | ID_4  | avg_Angle_left_front_shoulder_elbow_wrist | 133.1994913 |
| 21days | ID_5  | avg_Angle_left_front_shoulder_elbow_wrist | 124.0967548 |
| 21days | ID_6  | avg_Angle_left_front_shoulder_elbow_wrist | 138.6167141 |
| 21days | ID_7  | avg_Angle_left_front_shoulder_elbow_wrist | 129.9839995 |
| 21days | ID_8  | avg_Angle_left_front_shoulder_elbow_wrist | 117.7658956 |
| 21days | ID_9  | avg_Angle_left_front_shoulder_elbow_wrist | 110.2205771 |
| 21days | ID_10 | avg_Angle_left_front_shoulder_elbow_wrist | 119.8867237 |
| 0days  | ID_1  | avg_Angle_right_back_hip_ankle_toe        | 114.5769635 |
| 0days  | ID_2  | avg_Angle_right_back_hip_ankle_toe        | 122.2705118 |
| 0days  | ID_3  | avg_Angle_right_back_hip_ankle_toe        | 103.3324766 |
| 0days  | ID_4  | avg_Angle_right_back_hip_ankle_toe        | 112.8440145 |
| 0days  | ID_5  | avg_Angle_right_back_hip_ankle_toe        | 110.2712448 |
| 0days  | ID_6  | avg_Angle_right_back_hip_ankle_toe        | 121.8546027 |
| 0days  | ID_7  | avg_Angle_right_back_hip_ankle_toe        | 126.7599113 |
| 0days  | ID_8  | avg_Angle_right_back_hip_ankle_toe        | 121.4244838 |
| 0days  | ID_9  | avg_Angle_right_back_hip_ankle_toe        | 113.8967985 |
| 0days  | ID_10 | avg_Angle_right_back_hip_ankle_toe        | 110.1801702 |
| 0days  | ID_11 | avg_Angle_right_back_hip_ankle_toe        | 108.940755  |
| 0days  | ID_12 | avg_Angle_right_back_hip_ankle_toe        | 120.5667082 |
| 0days  | ID_13 | avg_Angle_right_back_hip_ankle_toe        | 119.9883246 |
| 3days  | ID_1  | avg_Angle_right_back_hip_ankle_toe        | 106.8085309 |
| 3days  | ID_2  | avg_Angle_right_back_hip_ankle_toe        | 103.6828796 |
| 3days  | ID_3  | avg_Angle_right_back_hip_ankle_toe        | 102.5763069 |
| 3days  | ID_4  | avg_Angle_right_back_hip_ankle_toe        | 107.0847789 |
| 3days  | ID_5  | avg_Angle_right_back_hip_ankle_toe        | 115.7164427 |
| 3days  | ID_6  | avg_Angle_right_back_hip_ankle_toe        | 101.30363   |
| 3days  | ID_7  | avg_Angle_right_back_hip_ankle_toe        | 115.9324685 |
| 3days  | ID_8  | avg_Angle_right_back_hip_ankle_toe        | 108.7504831 |
| 7days  | ID_1  | avg_Angle_right_back_hip_ankle_toe        | 105.1805545 |
| 7days  | ID_2  | avg_Angle_right_back_hip_ankle_toe        | 104.6534542 |
| 7days  | ID_3  | avg_Angle_right_back_hip_ankle_toe        | 106.6916234 |
| 7days  | ID_4  | avg_Angle_right_back_hip_ankle_toe        | 116.8184409 |
| 7days  | ID_5  | avg_Angle_right_back_hip_ankle_toe        | 122.1769937 |
| 7days  | ID_6  | avg_Angle_right_back_hip_ankle_toe        | 113.2392476 |
| 7days  | ID_7  | avg_Angle_right_back_hip_ankle_toe        | 122.0734282 |
| 7days  | ID_8  | avg_Angle_right_back_hip_ankle_toe        | 112.2490091 |
| 7days  | ID_9  | avg_Angle_right_back_hip_ankle_toe        | 115.0983191 |
| 14days | ID_1  | avg_Angle_right_back_hip_ankle_toe        | 111.8480481 |
| 14days | ID_2  | avg_Angle_right_back_hip_ankle_toe        | 110.8127988 |
| 14days | ID_3  | avg_Angle_right_back_hip_ankle_toe        | 106.8557434 |
| 14days | ID_4  | avg_Angle_right_back_hip_ankle_toe        | 111.8824012 |

|        |       |                                      |             |
|--------|-------|--------------------------------------|-------------|
| 14days | ID_5  | avg_Angle_right_back_hip_ankle_toe   | 111.6102234 |
| 14days | ID_6  | avg_Angle_right_back_hip_ankle_toe   | 106.1085687 |
| 14days | ID_7  | avg_Angle_right_back_hip_ankle_toe   | 120.6597897 |
| 14days | ID_8  | avg_Angle_right_back_hip_ankle_toe   | 123.1715971 |
| 14days | ID_9  | avg_Angle_right_back_hip_ankle_toe   | 122.5984961 |
| 14days | ID_10 | avg_Angle_right_back_hip_ankle_toe   | 115.5226258 |
| 14days | ID_11 | avg_Angle_right_back_hip_ankle_toe   | 106.8107176 |
| 21days | ID_1  | avg_Angle_right_back_hip_ankle_toe   | 115.293123  |
| 21days | ID_2  | avg_Angle_right_back_hip_ankle_toe   | 124.3191046 |
| 21days | ID_3  | avg_Angle_right_back_hip_ankle_toe   | 109.0419382 |
| 21days | ID_4  | avg_Angle_right_back_hip_ankle_toe   | 109.2447171 |
| 21days | ID_5  | avg_Angle_right_back_hip_ankle_toe   | 108.6220688 |
| 21days | ID_6  | avg_Angle_right_back_hip_ankle_toe   | 113.6744101 |
| 21days | ID_7  | avg_Angle_right_back_hip_ankle_toe   | 115.6251443 |
| 21days | ID_8  | avg_Angle_right_back_hip_ankle_toe   | 113.520347  |
| 21days | ID_9  | avg_Angle_right_back_hip_ankle_toe   | 117.1446924 |
| 21days | ID_10 | avg_Angle_right_back_hip_ankle_toe   | 124.3530475 |
| 0days  | ID_1  | avg_Angle_right_back_iliac_hip_ankle | 139.9973957 |
| 0days  | ID_2  | avg_Angle_right_back_iliac_hip_ankle | 132.2151988 |
| 0days  | ID_3  | avg_Angle_right_back_iliac_hip_ankle | 132.1324056 |
| 0days  | ID_4  | avg_Angle_right_back_iliac_hip_ankle | 138.7875944 |
| 0days  | ID_5  | avg_Angle_right_back_iliac_hip_ankle | 135.5329007 |
| 0days  | ID_6  | avg_Angle_right_back_iliac_hip_ankle | 143.9298157 |
| 0days  | ID_7  | avg_Angle_right_back_iliac_hip_ankle | 140.863859  |
| 0days  | ID_8  | avg_Angle_right_back_iliac_hip_ankle | 144.9916763 |
| 0days  | ID_9  | avg_Angle_right_back_iliac_hip_ankle | 138.9638264 |
| 0days  | ID_10 | avg_Angle_right_back_iliac_hip_ankle | 139.7879085 |
| 0days  | ID_11 | avg_Angle_right_back_iliac_hip_ankle | 145.3395096 |
| 0days  | ID_12 | avg_Angle_right_back_iliac_hip_ankle | 136.4507223 |
| 0days  | ID_13 | avg_Angle_right_back_iliac_hip_ankle | 135.6055551 |
| 3days  | ID_1  | avg_Angle_right_back_iliac_hip_ankle | 145.0867908 |
| 3days  | ID_2  | avg_Angle_right_back_iliac_hip_ankle | 138.6000723 |
| 3days  | ID_3  | avg_Angle_right_back_iliac_hip_ankle | 158.7954739 |
| 3days  | ID_4  | avg_Angle_right_back_iliac_hip_ankle | 152.3592993 |
| 3days  | ID_5  | avg_Angle_right_back_iliac_hip_ankle | 152.4397201 |
| 3days  | ID_6  | avg_Angle_right_back_iliac_hip_ankle | 157.2265762 |
| 3days  | ID_7  | avg_Angle_right_back_iliac_hip_ankle | 158.5761679 |
| 3days  | ID_8  | avg_Angle_right_back_iliac_hip_ankle | 146.042992  |
| 7days  | ID_1  | avg_Angle_right_back_iliac_hip_ankle | 134.5954576 |
| 7days  | ID_2  | avg_Angle_right_back_iliac_hip_ankle | 134.4924278 |
| 7days  | ID_3  | avg_Angle_right_back_iliac_hip_ankle | 139.6648178 |
| 7days  | ID_4  | avg_Angle_right_back_iliac_hip_ankle | 143.5968235 |
| 7days  | ID_5  | avg_Angle_right_back_iliac_hip_ankle | 142.1148327 |
| 7days  | ID_6  | avg_Angle_right_back_iliac_hip_ankle | 140.4937131 |
| 7days  | ID_7  | avg_Angle_right_back_iliac_hip_ankle | 133.3226465 |
| 7days  | ID_8  | avg_Angle_right_back_iliac_hip_ankle | 139.603305  |
| 7days  | ID_9  | avg_Angle_right_back_iliac_hip_ankle | 130.7913714 |
| 14days | ID_1  | avg_Angle_right_back_iliac_hip_ankle | 136.2968398 |

|        |       |                                          |             |
|--------|-------|------------------------------------------|-------------|
| 14days | ID_2  | avg_Angle_right_back_iliac_hip_ankle     | 136.3452176 |
| 14days | ID_3  | avg_Angle_right_back_iliac_hip_ankle     | 145.6442664 |
| 14days | ID_4  | avg_Angle_right_back_iliac_hip_ankle     | 136.4898882 |
| 14days | ID_5  | avg_Angle_right_back_iliac_hip_ankle     | 135.8930869 |
| 14days | ID_6  | avg_Angle_right_back_iliac_hip_ankle     | 134.8852585 |
| 14days | ID_7  | avg_Angle_right_back_iliac_hip_ankle     | 146.1150925 |
| 14days | ID_8  | avg_Angle_right_back_iliac_hip_ankle     | 136.7045303 |
| 14days | ID_9  | avg_Angle_right_back_iliac_hip_ankle     | 135.7985651 |
| 14days | ID_10 | avg_Angle_right_back_iliac_hip_ankle     | 126.191667  |
| 14days | ID_11 | avg_Angle_right_back_iliac_hip_ankle     | 133.6199036 |
| 21days | ID_1  | avg_Angle_right_back_iliac_hip_ankle     | 130.3417223 |
| 21days | ID_2  | avg_Angle_right_back_iliac_hip_ankle     | 134.8075987 |
| 21days | ID_3  | avg_Angle_right_back_iliac_hip_ankle     | 132.5816702 |
| 21days | ID_4  | avg_Angle_right_back_iliac_hip_ankle     | 134.2766531 |
| 21days | ID_5  | avg_Angle_right_back_iliac_hip_ankle     | 137.0984114 |
| 21days | ID_6  | avg_Angle_right_back_iliac_hip_ankle     | 139.8085174 |
| 21days | ID_7  | avg_Angle_right_back_iliac_hip_ankle     | 131.4147009 |
| 21days | ID_8  | avg_Angle_right_back_iliac_hip_ankle     | 142.0365838 |
| 21days | ID_9  | avg_Angle_right_back_iliac_hip_ankle     | 133.996252  |
| 21days | ID_10 | avg_Angle_right_back_iliac_hip_ankle     | 132.5078168 |
| 0days  | ID_1  | avg_Angle_right_front_elbow_wrist_toetip | 147.4149331 |
| 0days  | ID_2  | avg_Angle_right_front_elbow_wrist_toetip | 144.1783268 |
| 0days  | ID_3  | avg_Angle_right_front_elbow_wrist_toetip | 144.5530737 |
| 0days  | ID_4  | avg_Angle_right_front_elbow_wrist_toetip | 148.8118398 |
| 0days  | ID_5  | avg_Angle_right_front_elbow_wrist_toetip | 137.4973971 |
| 0days  | ID_6  | avg_Angle_right_front_elbow_wrist_toetip | 143.5859217 |
| 0days  | ID_7  | avg_Angle_right_front_elbow_wrist_toetip | 142.3324726 |
| 0days  | ID_8  | avg_Angle_right_front_elbow_wrist_toetip | 149.4534672 |
| 0days  | ID_9  | avg_Angle_right_front_elbow_wrist_toetip | 140.2925521 |
| 0days  | ID_10 | avg_Angle_right_front_elbow_wrist_toetip | 139.6580109 |
| 0days  | ID_11 | avg_Angle_right_front_elbow_wrist_toetip | 141.1675697 |
| 0days  | ID_12 | avg_Angle_right_front_elbow_wrist_toetip | 138.9766468 |
| 0days  | ID_13 | avg_Angle_right_front_elbow_wrist_toetip | 137.7000768 |
| 3days  | ID_1  | avg_Angle_right_front_elbow_wrist_toetip | 131.7338568 |
| 3days  | ID_2  | avg_Angle_right_front_elbow_wrist_toetip | 140.388301  |
| 3days  | ID_3  | avg_Angle_right_front_elbow_wrist_toetip | 130.3957893 |
| 3days  | ID_4  | avg_Angle_right_front_elbow_wrist_toetip | 134.4634459 |
| 3days  | ID_5  | avg_Angle_right_front_elbow_wrist_toetip | 129.943651  |
| 3days  | ID_6  | avg_Angle_right_front_elbow_wrist_toetip | 121.2009802 |
| 3days  | ID_7  | avg_Angle_right_front_elbow_wrist_toetip | 128.0118273 |
| 3days  | ID_8  | avg_Angle_right_front_elbow_wrist_toetip | 129.0815659 |
| 7days  | ID_1  | avg_Angle_right_front_elbow_wrist_toetip | 126.7751667 |
| 7days  | ID_2  | avg_Angle_right_front_elbow_wrist_toetip | 123.717096  |
| 7days  | ID_3  | avg_Angle_right_front_elbow_wrist_toetip | 128.4997988 |
| 7days  | ID_4  | avg_Angle_right_front_elbow_wrist_toetip | 136.6072312 |
| 7days  | ID_5  | avg_Angle_right_front_elbow_wrist_toetip | 151.5066857 |
| 7days  | ID_6  | avg_Angle_right_front_elbow_wrist_toetip | 132.9994875 |
| 7days  | ID_7  | avg_Angle_right_front_elbow_wrist_toetip | 144.6194409 |

|        |       |                                            |             |
|--------|-------|--------------------------------------------|-------------|
| 7days  | ID_8  | avg_Angle_right_front_elbow_wrist_toetip   | 122.4405135 |
| 7days  | ID_9  | avg_Angle_right_front_elbow_wrist_toetip   | 134.7909266 |
| 14days | ID_1  | avg_Angle_right_front_elbow_wrist_toetip   | 131.1095135 |
| 14days | ID_2  | avg_Angle_right_front_elbow_wrist_toetip   | 139.8249006 |
| 14days | ID_3  | avg_Angle_right_front_elbow_wrist_toetip   | 118.1638702 |
| 14days | ID_4  | avg_Angle_right_front_elbow_wrist_toetip   | 137.4691995 |
| 14days | ID_5  | avg_Angle_right_front_elbow_wrist_toetip   | 133.8326746 |
| 14days | ID_6  | avg_Angle_right_front_elbow_wrist_toetip   | 141.5698108 |
| 14days | ID_7  | avg_Angle_right_front_elbow_wrist_toetip   | 143.4577418 |
| 14days | ID_8  | avg_Angle_right_front_elbow_wrist_toetip   | 128.863032  |
| 14days | ID_9  | avg_Angle_right_front_elbow_wrist_toetip   | 149.2347708 |
| 14days | ID_10 | avg_Angle_right_front_elbow_wrist_toetip   | 143.3999389 |
| 14days | ID_11 | avg_Angle_right_front_elbow_wrist_toetip   | 133.0763005 |
| 21days | ID_1  | avg_Angle_right_front_elbow_wrist_toetip   | 123.6987701 |
| 21days | ID_2  | avg_Angle_right_front_elbow_wrist_toetip   | 144.9612586 |
| 21days | ID_3  | avg_Angle_right_front_elbow_wrist_toetip   | 127.0699557 |
| 21days | ID_4  | avg_Angle_right_front_elbow_wrist_toetip   | 142.9652855 |
| 21days | ID_5  | avg_Angle_right_front_elbow_wrist_toetip   | 125.3413558 |
| 21days | ID_6  | avg_Angle_right_front_elbow_wrist_toetip   | 146.6411507 |
| 21days | ID_7  | avg_Angle_right_front_elbow_wrist_toetip   | 150.4408418 |
| 21days | ID_8  | avg_Angle_right_front_elbow_wrist_toetip   | 136.7602109 |
| 21days | ID_9  | avg_Angle_right_front_elbow_wrist_toetip   | 126.0278079 |
| 21days | ID_10 | avg_Angle_right_front_elbow_wrist_toetip   | 129.9179322 |
| 0days  | ID_1  | avg_Angle_right_front_shoulder_elbow_wrist | 113.2772849 |
| 0days  | ID_2  | avg_Angle_right_front_shoulder_elbow_wrist | 126.8813728 |
| 0days  | ID_3  | avg_Angle_right_front_shoulder_elbow_wrist | 125.4043527 |
| 0days  | ID_4  | avg_Angle_right_front_shoulder_elbow_wrist | 119.6655822 |
| 0days  | ID_5  | avg_Angle_right_front_shoulder_elbow_wrist | 116.8499557 |
| 0days  | ID_6  | avg_Angle_right_front_shoulder_elbow_wrist | 127.2919935 |
| 0days  | ID_7  | avg_Angle_right_front_shoulder_elbow_wrist | 120.9959559 |
| 0days  | ID_8  | avg_Angle_right_front_shoulder_elbow_wrist | 115.0245043 |
| 0days  | ID_9  | avg_Angle_right_front_shoulder_elbow_wrist | 134.3973256 |
| 0days  | ID_10 | avg_Angle_right_front_shoulder_elbow_wrist | 119.6953038 |
| 0days  | ID_11 | avg_Angle_right_front_shoulder_elbow_wrist | 116.0094194 |
| 0days  | ID_12 | avg_Angle_right_front_shoulder_elbow_wrist | 123.6923289 |
| 0days  | ID_13 | avg_Angle_right_front_shoulder_elbow_wrist | 131.2565151 |
| 3days  | ID_1  | avg_Angle_right_front_shoulder_elbow_wrist | 126.3122977 |
| 3days  | ID_2  | avg_Angle_right_front_shoulder_elbow_wrist | 126.139292  |
| 3days  | ID_3  | avg_Angle_right_front_shoulder_elbow_wrist | 122.6527397 |
| 3days  | ID_4  | avg_Angle_right_front_shoulder_elbow_wrist | 130.1594753 |
| 3days  | ID_5  | avg_Angle_right_front_shoulder_elbow_wrist | 134.1475915 |
| 3days  | ID_6  | avg_Angle_right_front_shoulder_elbow_wrist | 128.6257931 |
| 3days  | ID_7  | avg_Angle_right_front_shoulder_elbow_wrist | 128.3984498 |
| 3days  | ID_8  | avg_Angle_right_front_shoulder_elbow_wrist | 133.7257222 |
| 7days  | ID_1  | avg_Angle_right_front_shoulder_elbow_wrist | 118.7624668 |
| 7days  | ID_2  | avg_Angle_right_front_shoulder_elbow_wrist | 126.7617471 |
| 7days  | ID_3  | avg_Angle_right_front_shoulder_elbow_wrist | 133.1418351 |
| 7days  | ID_4  | avg_Angle_right_front_shoulder_elbow_wrist | 125.7375807 |



|        |       |                                            |             |
|--------|-------|--------------------------------------------|-------------|
| 7days  | ID_5  | avg_Angle_right_front_shoulder_elbow_wrist | 126.1182715 |
| 7days  | ID_6  | avg_Angle_right_front_shoulder_elbow_wrist | 123.7695133 |
| 7days  | ID_7  | avg_Angle_right_front_shoulder_elbow_wrist | 114.7837253 |
| 7days  | ID_8  | avg_Angle_right_front_shoulder_elbow_wrist | 132.59376   |
| 7days  | ID_9  | avg_Angle_right_front_shoulder_elbow_wrist | 114.3278074 |
| 14days | ID_1  | avg_Angle_right_front_shoulder_elbow_wrist | 129.8586273 |
| 14days | ID_2  | avg_Angle_right_front_shoulder_elbow_wrist | 126.3839048 |
| 14days | ID_3  | avg_Angle_right_front_shoulder_elbow_wrist | 125.23928   |
| 14days | ID_4  | avg_Angle_right_front_shoulder_elbow_wrist | 121.9049694 |
| 14days | ID_5  | avg_Angle_right_front_shoulder_elbow_wrist | 123.0158817 |
| 14days | ID_6  | avg_Angle_right_front_shoulder_elbow_wrist | 124.9294654 |
| 14days | ID_7  | avg_Angle_right_front_shoulder_elbow_wrist | 130.5094206 |
| 14days | ID_8  | avg_Angle_right_front_shoulder_elbow_wrist | 124.4738622 |
| 14days | ID_9  | avg_Angle_right_front_shoulder_elbow_wrist | 116.8330872 |
| 14days | ID_10 | avg_Angle_right_front_shoulder_elbow_wrist | 127.9545522 |
| 14days | ID_11 | avg_Angle_right_front_shoulder_elbow_wrist | 139.1968385 |
| 21days | ID_1  | avg_Angle_right_front_shoulder_elbow_wrist | 128.3816376 |
| 21days | ID_2  | avg_Angle_right_front_shoulder_elbow_wrist | 112.0888589 |
| 21days | ID_3  | avg_Angle_right_front_shoulder_elbow_wrist | 119.7675932 |
| 21days | ID_4  | avg_Angle_right_front_shoulder_elbow_wrist | 121.3687758 |
| 21days | ID_5  | avg_Angle_right_front_shoulder_elbow_wrist | 136.0642249 |
| 21days | ID_6  | avg_Angle_right_front_shoulder_elbow_wrist | 122.9247985 |
| 21days | ID_7  | avg_Angle_right_front_shoulder_elbow_wrist | 119.0599052 |
| 21days | ID_8  | avg_Angle_right_front_shoulder_elbow_wrist | 128.6807356 |
| 21days | ID_9  | avg_Angle_right_front_shoulder_elbow_wrist | 135.3323797 |
| 21days | ID_10 | avg_Angle_right_front_shoulder_elbow_wrist | 137.6440652 |
| 0days  | ID_1  | max_left_back_hip_ankle_toe                | 91.72732898 |
| 0days  | ID_2  | max_left_back_hip_ankle_toe                | 103.415943  |
| 0days  | ID_3  | max_left_back_hip_ankle_toe                | 86.94896634 |
| 0days  | ID_4  | max_left_back_hip_ankle_toe                | 94.89330671 |
| 0days  | ID_5  | max_left_back_hip_ankle_toe                | 92.53341159 |
| 0days  | ID_6  | max_left_back_hip_ankle_toe                | 117.3569744 |
| 0days  | ID_7  | max_left_back_hip_ankle_toe                | 104.3963876 |
| 0days  | ID_8  | max_left_back_hip_ankle_toe                | 117.5357266 |
| 0days  | ID_9  | max_left_back_hip_ankle_toe                | 99.03623939 |
| 0days  | ID_10 | max_left_back_hip_ankle_toe                | 106.4866912 |
| 0days  | ID_11 | max_left_back_hip_ankle_toe                | 103.7768113 |
| 0days  | ID_12 | max_left_back_hip_ankle_toe                | 112.5409555 |
| 0days  | ID_13 | max_left_back_hip_ankle_toe                | 110.1309223 |
| 3days  | ID_1  | max_left_back_hip_ankle_toe                | 101.6614086 |
| 3days  | ID_2  | max_left_back_hip_ankle_toe                | 91.52570474 |
| 3days  | ID_3  | max_left_back_hip_ankle_toe                | 50.62944087 |
| 3days  | ID_4  | max_left_back_hip_ankle_toe                | 105.2300481 |
| 3days  | ID_5  | max_left_back_hip_ankle_toe                | 107.9986038 |
| 3days  | ID_6  | max_left_back_hip_ankle_toe                | 64.51797797 |
| 3days  | ID_7  | max_left_back_hip_ankle_toe                | 69.17091801 |
| 3days  | ID_8  | max_left_back_hip_ankle_toe                | 113.7393019 |
| 7days  | ID_1  | max_left_back_hip_ankle_toe                | 98.52715467 |

|        |       |                               |             |
|--------|-------|-------------------------------|-------------|
| 7days  | ID_2  | max_left_back_hip_ankle_toe   | 92.8590913  |
| 7days  | ID_3  | max_left_back_hip_ankle_toe   | 93.78106375 |
| 7days  | ID_4  | max_left_back_hip_ankle_toe   | 109.6313984 |
| 7days  | ID_5  | max_left_back_hip_ankle_toe   | 91.86109296 |
| 7days  | ID_6  | max_left_back_hip_ankle_toe   | 107.0616571 |
| 7days  | ID_7  | max_left_back_hip_ankle_toe   | 89.9443564  |
| 7days  | ID_8  | max_left_back_hip_ankle_toe   | 100.1166307 |
| 7days  | ID_9  | max_left_back_hip_ankle_toe   | 100.9042805 |
| 14days | ID_1  | max_left_back_hip_ankle_toe   | 83.07903389 |
| 14days | ID_2  | max_left_back_hip_ankle_toe   | 96.32599253 |
| 14days | ID_3  | max_left_back_hip_ankle_toe   | 101.6801311 |
| 14days | ID_4  | max_left_back_hip_ankle_toe   | 94.9717     |
| 14days | ID_5  | max_left_back_hip_ankle_toe   | 92.57461962 |
| 14days | ID_6  | max_left_back_hip_ankle_toe   | 94.93041555 |
| 14days | ID_7  | max_left_back_hip_ankle_toe   | 103.0470832 |
| 14days | ID_8  | max_left_back_hip_ankle_toe   | 99.14942948 |
| 14days | ID_9  | max_left_back_hip_ankle_toe   | 99.2078674  |
| 14days | ID_10 | max_left_back_hip_ankle_toe   | 102.8291154 |
| 14days | ID_11 | max_left_back_hip_ankle_toe   | 101.9907584 |
| 21days | ID_1  | max_left_back_hip_ankle_toe   | 110.083241  |
| 21days | ID_2  | max_left_back_hip_ankle_toe   | 109.9518523 |
| 21days | ID_3  | max_left_back_hip_ankle_toe   | 109.1246646 |
| 21days | ID_4  | max_left_back_hip_ankle_toe   | 94.69368837 |
| 21days | ID_5  | max_left_back_hip_ankle_toe   | 97.25821168 |
| 21days | ID_6  | max_left_back_hip_ankle_toe   | 84.79785403 |
| 21days | ID_7  | max_left_back_hip_ankle_toe   | 104.4087642 |
| 21days | ID_8  | max_left_back_hip_ankle_toe   | 115.0738421 |
| 21days | ID_9  | max_left_back_hip_ankle_toe   | 108.9990528 |
| 21days | ID_10 | max_left_back_hip_ankle_toe   | 120.5220217 |
| 0days  | ID_1  | max_left_back_iliac_hip_ankle | 115.3714243 |
| 0days  | ID_2  | max_left_back_iliac_hip_ankle | 117.372634  |
| 0days  | ID_3  | max_left_back_iliac_hip_ankle | 126.0277972 |
| 0days  | ID_4  | max_left_back_iliac_hip_ankle | 115.9285448 |
| 0days  | ID_5  | max_left_back_iliac_hip_ankle | 119.2465194 |
| 0days  | ID_6  | max_left_back_iliac_hip_ankle | 117.4722069 |
| 0days  | ID_7  | max_left_back_iliac_hip_ankle | 117.9216707 |
| 0days  | ID_8  | max_left_back_iliac_hip_ankle | 119.4815222 |
| 0days  | ID_9  | max_left_back_iliac_hip_ankle | 113.882047  |
| 0days  | ID_10 | max_left_back_iliac_hip_ankle | 110.8659699 |
| 0days  | ID_11 | max_left_back_iliac_hip_ankle | 113.6981679 |
| 0days  | ID_12 | max_left_back_iliac_hip_ankle | 107.4834909 |
| 0days  | ID_13 | max_left_back_iliac_hip_ankle | 111.6424051 |
| 3days  | ID_1  | max_left_back_iliac_hip_ankle | 115.6355542 |
| 3days  | ID_2  | max_left_back_iliac_hip_ankle | 119.2463184 |
| 3days  | ID_3  | max_left_back_iliac_hip_ankle | 137.8699229 |
| 3days  | ID_4  | max_left_back_iliac_hip_ankle | 112.5517247 |
| 3days  | ID_5  | max_left_back_iliac_hip_ankle | 118.6173548 |
| 3days  | ID_6  | max_left_back_iliac_hip_ankle | 138.6060308 |

|        |       |                                   |             |
|--------|-------|-----------------------------------|-------------|
| 3days  | ID_7  | max_left_back_iliac_hip_ankle     | 134.0105199 |
| 3days  | ID_8  | max_left_back_iliac_hip_ankle     | 114.0096058 |
| 7days  | ID_1  | max_left_back_iliac_hip_ankle     | 111.5305125 |
| 7days  | ID_2  | max_left_back_iliac_hip_ankle     | 117.4604646 |
| 7days  | ID_3  | max_left_back_iliac_hip_ankle     | 119.3846507 |
| 7days  | ID_4  | max_left_back_iliac_hip_ankle     | 119.5076853 |
| 7days  | ID_5  | max_left_back_iliac_hip_ankle     | 126.3379295 |
| 7days  | ID_6  | max_left_back_iliac_hip_ankle     | 111.7489541 |
| 7days  | ID_7  | max_left_back_iliac_hip_ankle     | 117.2496673 |
| 7days  | ID_8  | max_left_back_iliac_hip_ankle     | 118.186402  |
| 7days  | ID_9  | max_left_back_iliac_hip_ankle     | 112.3142177 |
| 14days | ID_1  | max_left_back_iliac_hip_ankle     | 116.937847  |
| 14days | ID_2  | max_left_back_iliac_hip_ankle     | 115.1037084 |
| 14days | ID_3  | max_left_back_iliac_hip_ankle     | 115.4921607 |
| 14days | ID_4  | max_left_back_iliac_hip_ankle     | 114.6037582 |
| 14days | ID_5  | max_left_back_iliac_hip_ankle     | 114.0522261 |
| 14days | ID_6  | max_left_back_iliac_hip_ankle     | 117.8522634 |
| 14days | ID_7  | max_left_back_iliac_hip_ankle     | 114.5243285 |
| 14days | ID_8  | max_left_back_iliac_hip_ankle     | 118.9617234 |
| 14days | ID_9  | max_left_back_iliac_hip_ankle     | 126.5048296 |
| 14days | ID_10 | max_left_back_iliac_hip_ankle     | 117.2050801 |
| 14days | ID_11 | max_left_back_iliac_hip_ankle     | 111.5723757 |
| 21days | ID_1  | max_left_back_iliac_hip_ankle     | 109.5141684 |
| 21days | ID_2  | max_left_back_iliac_hip_ankle     | 112.4554472 |
| 21days | ID_3  | max_left_back_iliac_hip_ankle     | 110.4079356 |
| 21days | ID_4  | max_left_back_iliac_hip_ankle     | 107.3789559 |
| 21days | ID_5  | max_left_back_iliac_hip_ankle     | 116.0243885 |
| 21days | ID_6  | max_left_back_iliac_hip_ankle     | 115.9531074 |
| 21days | ID_7  | max_left_back_iliac_hip_ankle     | 115.1965799 |
| 21days | ID_8  | max_left_back_iliac_hip_ankle     | 107.166235  |
| 21days | ID_9  | max_left_back_iliac_hip_ankle     | 106.5565077 |
| 21days | ID_10 | max_left_back_iliac_hip_ankle     | 118.5481452 |
| 0days  | ID_1  | max_left_front_elbow_wrist_toetip | 109.1394446 |
| 0days  | ID_2  | max_left_front_elbow_wrist_toetip | 115.0539533 |
| 0days  | ID_3  | max_left_front_elbow_wrist_toetip | 117.5839455 |
| 0days  | ID_4  | max_left_front_elbow_wrist_toetip | 112.1229604 |
| 0days  | ID_5  | max_left_front_elbow_wrist_toetip | 110.4515599 |
| 0days  | ID_6  | max_left_front_elbow_wrist_toetip | 111.7664072 |
| 0days  | ID_7  | max_left_front_elbow_wrist_toetip | 109.6098502 |
| 0days  | ID_8  | max_left_front_elbow_wrist_toetip | 114.7311377 |
| 0days  | ID_9  | max_left_front_elbow_wrist_toetip | 117.5478112 |
| 0days  | ID_10 | max_left_front_elbow_wrist_toetip | 106.8709378 |
| 0days  | ID_11 | max_left_front_elbow_wrist_toetip | 96.15509457 |
| 0days  | ID_12 | max_left_front_elbow_wrist_toetip | 115.4105023 |
| 0days  | ID_13 | max_left_front_elbow_wrist_toetip | 114.237395  |
| 3days  | ID_1  | max_left_front_elbow_wrist_toetip | 107.7074702 |
| 3days  | ID_2  | max_left_front_elbow_wrist_toetip | 103.5673784 |
| 3days  | ID_3  | max_left_front_elbow_wrist_toetip | 88.77930008 |

|        |       |                                     |             |
|--------|-------|-------------------------------------|-------------|
| 3days  | ID_4  | max_left_front_elbow_wrist_toetip   | 101.5046599 |
| 3days  | ID_5  | max_left_front_elbow_wrist_toetip   | 111.288825  |
| 3days  | ID_6  | max_left_front_elbow_wrist_toetip   | 86.92063815 |
| 3days  | ID_7  | max_left_front_elbow_wrist_toetip   | 88.82415752 |
| 3days  | ID_8  | max_left_front_elbow_wrist_toetip   | 106.0736816 |
| 7days  | ID_1  | max_left_front_elbow_wrist_toetip   | 89.66225482 |
| 7days  | ID_2  | max_left_front_elbow_wrist_toetip   | 99.98182634 |
| 7days  | ID_3  | max_left_front_elbow_wrist_toetip   | 101.1681076 |
| 7days  | ID_4  | max_left_front_elbow_wrist_toetip   | 109.8275479 |
| 7days  | ID_5  | max_left_front_elbow_wrist_toetip   | 99.6299151  |
| 7days  | ID_6  | max_left_front_elbow_wrist_toetip   | 108.8489702 |
| 7days  | ID_7  | max_left_front_elbow_wrist_toetip   | 89.39504579 |
| 7days  | ID_8  | max_left_front_elbow_wrist_toetip   | 110.7440502 |
| 7days  | ID_9  | max_left_front_elbow_wrist_toetip   | 93.27650942 |
| 14days | ID_1  | max_left_front_elbow_wrist_toetip   | 89.50101884 |
| 14days | ID_2  | max_left_front_elbow_wrist_toetip   | 92.82770689 |
| 14days | ID_3  | max_left_front_elbow_wrist_toetip   | 74.48369071 |
| 14days | ID_4  | max_left_front_elbow_wrist_toetip   | 93.15068127 |
| 14days | ID_5  | max_left_front_elbow_wrist_toetip   | 92.3054446  |
| 14days | ID_6  | max_left_front_elbow_wrist_toetip   | 103.1200699 |
| 14days | ID_7  | max_left_front_elbow_wrist_toetip   | 111.6858828 |
| 14days | ID_8  | max_left_front_elbow_wrist_toetip   | 114.2046072 |
| 14days | ID_9  | max_left_front_elbow_wrist_toetip   | 103.6076443 |
| 14days | ID_10 | max_left_front_elbow_wrist_toetip   | 93.22818414 |
| 14days | ID_11 | max_left_front_elbow_wrist_toetip   | 102.6981546 |
| 21days | ID_1  | max_left_front_elbow_wrist_toetip   | 106.3413062 |
| 21days | ID_2  | max_left_front_elbow_wrist_toetip   | 89.01349576 |
| 21days | ID_3  | max_left_front_elbow_wrist_toetip   | 108.3413232 |
| 21days | ID_4  | max_left_front_elbow_wrist_toetip   | 91.94315286 |
| 21days | ID_5  | max_left_front_elbow_wrist_toetip   | 104.1403033 |
| 21days | ID_6  | max_left_front_elbow_wrist_toetip   | 92.71269221 |
| 21days | ID_7  | max_left_front_elbow_wrist_toetip   | 93.69806701 |
| 21days | ID_8  | max_left_front_elbow_wrist_toetip   | 104.3914548 |
| 21days | ID_9  | max_left_front_elbow_wrist_toetip   | 112.6317496 |
| 21days | ID_10 | max_left_front_elbow_wrist_toetip   | 108.3729804 |
| 0days  | ID_1  | max_left_front_shoulder_elbow_wrist | 84.30849219 |
| 0days  | ID_2  | max_left_front_shoulder_elbow_wrist | 86.62929107 |
| 0days  | ID_3  | max_left_front_shoulder_elbow_wrist | 114.6183676 |
| 0days  | ID_4  | max_left_front_shoulder_elbow_wrist | 88.00997075 |
| 0days  | ID_5  | max_left_front_shoulder_elbow_wrist | 84.53577601 |
| 0days  | ID_6  | max_left_front_shoulder_elbow_wrist | 92.35080845 |
| 0days  | ID_7  | max_left_front_shoulder_elbow_wrist | 95.63154558 |
| 0days  | ID_8  | max_left_front_shoulder_elbow_wrist | 88.54447942 |
| 0days  | ID_9  | max_left_front_shoulder_elbow_wrist | 89.92213854 |
| 0days  | ID_10 | max_left_front_shoulder_elbow_wrist | 88.9051869  |
| 0days  | ID_11 | max_left_front_shoulder_elbow_wrist | 89.83989865 |
| 0days  | ID_12 | max_left_front_shoulder_elbow_wrist | 88.97322094 |
| 0days  | ID_13 | max_left_front_shoulder_elbow_wrist | 88.75442785 |

|        |       |                                     |             |
|--------|-------|-------------------------------------|-------------|
| 3days  | ID_1  | max_left_front_shoulder_elbow_wrist | 87.90184741 |
| 3days  | ID_2  | max_left_front_shoulder_elbow_wrist | 93.36346025 |
| 3days  | ID_3  | max_left_front_shoulder_elbow_wrist | 84.58947978 |
| 3days  | ID_4  | max_left_front_shoulder_elbow_wrist | 90.75839225 |
| 3days  | ID_5  | max_left_front_shoulder_elbow_wrist | 94.3020503  |
| 3days  | ID_6  | max_left_front_shoulder_elbow_wrist | 90.77141301 |
| 3days  | ID_7  | max_left_front_shoulder_elbow_wrist | 102.7489449 |
| 3days  | ID_8  | max_left_front_shoulder_elbow_wrist | 90.32943105 |
| 7days  | ID_1  | max_left_front_shoulder_elbow_wrist | 85.3607612  |
| 7days  | ID_2  | max_left_front_shoulder_elbow_wrist | 81.52548133 |
| 7days  | ID_3  | max_left_front_shoulder_elbow_wrist | 90.66974203 |
| 7days  | ID_4  | max_left_front_shoulder_elbow_wrist | 93.92620484 |
| 7days  | ID_5  | max_left_front_shoulder_elbow_wrist | 97.96018927 |
| 7days  | ID_6  | max_left_front_shoulder_elbow_wrist | 85.74692944 |
| 7days  | ID_7  | max_left_front_shoulder_elbow_wrist | 94.25048263 |
| 7days  | ID_8  | max_left_front_shoulder_elbow_wrist | 88.3251087  |
| 7days  | ID_9  | max_left_front_shoulder_elbow_wrist | 98.89196048 |
| 14days | ID_1  | max_left_front_shoulder_elbow_wrist | 101.2726377 |
| 14days | ID_2  | max_left_front_shoulder_elbow_wrist | 102.3203625 |
| 14days | ID_3  | max_left_front_shoulder_elbow_wrist | 88.79720305 |
| 14days | ID_4  | max_left_front_shoulder_elbow_wrist | 91.51977852 |
| 14days | ID_5  | max_left_front_shoulder_elbow_wrist | 95.31226494 |
| 14days | ID_6  | max_left_front_shoulder_elbow_wrist | 89.89538177 |
| 14days | ID_7  | max_left_front_shoulder_elbow_wrist | 83.54411405 |
| 14days | ID_8  | max_left_front_shoulder_elbow_wrist | 80.75655096 |
| 14days | ID_9  | max_left_front_shoulder_elbow_wrist | 103.6051296 |
| 14days | ID_10 | max_left_front_shoulder_elbow_wrist | 100.5696788 |
| 14days | ID_11 | max_left_front_shoulder_elbow_wrist | 87.70256677 |
| 21days | ID_1  | max_left_front_shoulder_elbow_wrist | 83.46066055 |
| 21days | ID_2  | max_left_front_shoulder_elbow_wrist | 96.88246865 |
| 21days | ID_3  | max_left_front_shoulder_elbow_wrist | 83.30474903 |
| 21days | ID_4  | max_left_front_shoulder_elbow_wrist | 101.5530932 |
| 21days | ID_5  | max_left_front_shoulder_elbow_wrist | 90.38312205 |
| 21days | ID_6  | max_left_front_shoulder_elbow_wrist | 105.9018232 |
| 21days | ID_7  | max_left_front_shoulder_elbow_wrist | 97.570341   |
| 21days | ID_8  | max_left_front_shoulder_elbow_wrist | 87.07982696 |
| 21days | ID_9  | max_left_front_shoulder_elbow_wrist | 80.401434   |
| 21days | ID_10 | max_left_front_shoulder_elbow_wrist | 86.63374923 |
| 0days  | ID_1  | max_right_back_hip_ankle_toe        | 98.09740996 |
| 0days  | ID_2  | max_right_back_hip_ankle_toe        | 107.1280945 |
| 0days  | ID_3  | max_right_back_hip_ankle_toe        | 91.38798124 |
| 0days  | ID_4  | max_right_back_hip_ankle_toe        | 89.79730061 |
| 0days  | ID_5  | max_right_back_hip_ankle_toe        | 92.44508567 |
| 0days  | ID_6  | max_right_back_hip_ankle_toe        | 107.5178033 |
| 0days  | ID_7  | max_right_back_hip_ankle_toe        | 109.9635415 |
| 0days  | ID_8  | max_right_back_hip_ankle_toe        | 101.4994907 |
| 0days  | ID_9  | max_right_back_hip_ankle_toe        | 96.96533204 |
| 0days  | ID_10 | max_right_back_hip_ankle_toe        | 98.60137476 |

|        |       |                                |             |
|--------|-------|--------------------------------|-------------|
| 0days  | ID_11 | max_right_back_hip_ankle_toe   | 99.60377412 |
| 0days  | ID_12 | max_right_back_hip_ankle_toe   | 108.8444601 |
| 0days  | ID_13 | max_right_back_hip_ankle_toe   | 108.9121    |
| 3days  | ID_1  | max_right_back_hip_ankle_toe   | 89.9122847  |
| 3days  | ID_2  | max_right_back_hip_ankle_toe   | 83.29081951 |
| 3days  | ID_3  | max_right_back_hip_ankle_toe   | 71.29628097 |
| 3days  | ID_4  | max_right_back_hip_ankle_toe   | 92.12811429 |
| 3days  | ID_5  | max_right_back_hip_ankle_toe   | 98.33487308 |
| 3days  | ID_6  | max_right_back_hip_ankle_toe   | 56.93142735 |
| 3days  | ID_7  | max_right_back_hip_ankle_toe   | 79.44998109 |
| 3days  | ID_8  | max_right_back_hip_ankle_toe   | 87.01503671 |
| 7days  | ID_1  | max_right_back_hip_ankle_toe   | 91.26276361 |
| 7days  | ID_2  | max_right_back_hip_ankle_toe   | 87.81608679 |
| 7days  | ID_3  | max_right_back_hip_ankle_toe   | 91.70726729 |
| 7days  | ID_4  | max_right_back_hip_ankle_toe   | 98.27124061 |
| 7days  | ID_5  | max_right_back_hip_ankle_toe   | 106.57002   |
| 7days  | ID_6  | max_right_back_hip_ankle_toe   | 97.42542199 |
| 7days  | ID_7  | max_right_back_hip_ankle_toe   | 104.8321287 |
| 7days  | ID_8  | max_right_back_hip_ankle_toe   | 93.23755083 |
| 7days  | ID_9  | max_right_back_hip_ankle_toe   | 100.0327779 |
| 14days | ID_1  | max_right_back_hip_ankle_toe   | 90.50324738 |
| 14days | ID_2  | max_right_back_hip_ankle_toe   | 90.68399971 |
| 14days | ID_3  | max_right_back_hip_ankle_toe   | 93.96665162 |
| 14days | ID_4  | max_right_back_hip_ankle_toe   | 99.00391277 |
| 14days | ID_5  | max_right_back_hip_ankle_toe   | 99.47641336 |
| 14days | ID_6  | max_right_back_hip_ankle_toe   | 84.58263895 |
| 14days | ID_7  | max_right_back_hip_ankle_toe   | 102.3983019 |
| 14days | ID_8  | max_right_back_hip_ankle_toe   | 109.8576089 |
| 14days | ID_9  | max_right_back_hip_ankle_toe   | 102.7613329 |
| 14days | ID_10 | max_right_back_hip_ankle_toe   | 103.8333401 |
| 14days | ID_11 | max_right_back_hip_ankle_toe   | 93.45188218 |
| 21days | ID_1  | max_right_back_hip_ankle_toe   | 101.6829115 |
| 21days | ID_2  | max_right_back_hip_ankle_toe   | 95.87819758 |
| 21days | ID_3  | max_right_back_hip_ankle_toe   | 96.80301542 |
| 21days | ID_4  | max_right_back_hip_ankle_toe   | 92.78694543 |
| 21days | ID_5  | max_right_back_hip_ankle_toe   | 95.79613646 |
| 21days | ID_6  | max_right_back_hip_ankle_toe   | 85.8144255  |
| 21days | ID_7  | max_right_back_hip_ankle_toe   | 102.0594265 |
| 21days | ID_8  | max_right_back_hip_ankle_toe   | 98.60975728 |
| 21days | ID_9  | max_right_back_hip_ankle_toe   | 103.0829294 |
| 21days | ID_10 | max_right_back_hip_ankle_toe   | 107.7974327 |
| 0days  | ID_1  | max_right_back_iliac_hip_ankle | 112.0990845 |
| 0days  | ID_2  | max_right_back_iliac_hip_ankle | 108.7072396 |
| 0days  | ID_3  | max_right_back_iliac_hip_ankle | 119.5516735 |
| 0days  | ID_4  | max_right_back_iliac_hip_ankle | 120.3724578 |
| 0days  | ID_5  | max_right_back_iliac_hip_ankle | 114.6983898 |
| 0days  | ID_6  | max_right_back_iliac_hip_ankle | 119.9536656 |
| 0days  | ID_7  | max_right_back_iliac_hip_ankle | 118.0108086 |

|        |       |                                    |             |
|--------|-------|------------------------------------|-------------|
| 0days  | ID_8  | max_right_back_iliac_hip_ankle     | 116.2949838 |
| 0days  | ID_9  | max_right_back_iliac_hip_ankle     | 117.0934756 |
| 0days  | ID_10 | max_right_back_iliac_hip_ankle     | 115.2232001 |
| 0days  | ID_11 | max_right_back_iliac_hip_ankle     | 110.0888078 |
| 0days  | ID_12 | max_right_back_iliac_hip_ankle     | 113.8600195 |
| 0days  | ID_13 | max_right_back_iliac_hip_ankle     | 111.0195792 |
| 3days  | ID_1  | max_right_back_iliac_hip_ankle     | 115.5956252 |
| 3days  | ID_2  | max_right_back_iliac_hip_ankle     | 120.4523037 |
| 3days  | ID_3  | max_right_back_iliac_hip_ankle     | 124.113007  |
| 3days  | ID_4  | max_right_back_iliac_hip_ankle     | 127.5679809 |
| 3days  | ID_5  | max_right_back_iliac_hip_ankle     | 128.0599037 |
| 3days  | ID_6  | max_right_back_iliac_hip_ankle     | 125.0521204 |
| 3days  | ID_7  | max_right_back_iliac_hip_ankle     | 116.140444  |
| 3days  | ID_8  | max_right_back_iliac_hip_ankle     | 127.9030432 |
| 7days  | ID_1  | max_right_back_iliac_hip_ankle     | 104.8485708 |
| 7days  | ID_2  | max_right_back_iliac_hip_ankle     | 112.7933078 |
| 7days  | ID_3  | max_right_back_iliac_hip_ankle     | 113.5135571 |
| 7days  | ID_4  | max_right_back_iliac_hip_ankle     | 121.1774945 |
| 7days  | ID_5  | max_right_back_iliac_hip_ankle     | 118.1878291 |
| 7days  | ID_6  | max_right_back_iliac_hip_ankle     | 115.6278345 |
| 7days  | ID_7  | max_right_back_iliac_hip_ankle     | 106.1001075 |
| 7days  | ID_8  | max_right_back_iliac_hip_ankle     | 115.2921169 |
| 7days  | ID_9  | max_right_back_iliac_hip_ankle     | 111.2469024 |
| 14days | ID_1  | max_right_back_iliac_hip_ankle     | 113.3525857 |
| 14days | ID_2  | max_right_back_iliac_hip_ankle     | 119.1741782 |
| 14days | ID_3  | max_right_back_iliac_hip_ankle     | 101.7573607 |
| 14days | ID_4  | max_right_back_iliac_hip_ankle     | 113.7868875 |
| 14days | ID_5  | max_right_back_iliac_hip_ankle     | 115.1471597 |
| 14days | ID_6  | max_right_back_iliac_hip_ankle     | 115.6366594 |
| 14days | ID_7  | max_right_back_iliac_hip_ankle     | 123.2281414 |
| 14days | ID_8  | max_right_back_iliac_hip_ankle     | 106.4285606 |
| 14days | ID_9  | max_right_back_iliac_hip_ankle     | 112.7082898 |
| 14days | ID_10 | max_right_back_iliac_hip_ankle     | 110.6225826 |
| 14days | ID_11 | max_right_back_iliac_hip_ankle     | 110.02597   |
| 21days | ID_1  | max_right_back_iliac_hip_ankle     | 108.6244495 |
| 21days | ID_2  | max_right_back_iliac_hip_ankle     | 107.0100279 |
| 21days | ID_3  | max_right_back_iliac_hip_ankle     | 111.9578181 |
| 21days | ID_4  | max_right_back_iliac_hip_ankle     | 115.4965786 |
| 21days | ID_5  | max_right_back_iliac_hip_ankle     | 121.9876146 |
| 21days | ID_6  | max_right_back_iliac_hip_ankle     | 118.4272161 |
| 21days | ID_7  | max_right_back_iliac_hip_ankle     | 121.6298435 |
| 21days | ID_8  | max_right_back_iliac_hip_ankle     | 116.6923442 |
| 21days | ID_9  | max_right_back_iliac_hip_ankle     | 108.3975982 |
| 21days | ID_10 | max_right_back_iliac_hip_ankle     | 107.3501603 |
| 0days  | ID_1  | max_right_front_elbow_wrist_toetip | 101.5465915 |
| 0days  | ID_2  | max_right_front_elbow_wrist_toetip | 107.5680155 |
| 0days  | ID_3  | max_right_front_elbow_wrist_toetip | 116.2310477 |
| 0days  | ID_4  | max_right_front_elbow_wrist_toetip | 114.1121752 |

|        |       |                                      |             |
|--------|-------|--------------------------------------|-------------|
| 0days  | ID_5  | max_right_front_elbow_wrist_toetip   | 96.68553235 |
| 0days  | ID_6  | max_right_front_elbow_wrist_toetip   | 109.2646057 |
| 0days  | ID_7  | max_right_front_elbow_wrist_toetip   | 107.061423  |
| 0days  | ID_8  | max_right_front_elbow_wrist_toetip   | 113.1218669 |
| 0days  | ID_9  | max_right_front_elbow_wrist_toetip   | 115.7744057 |
| 0days  | ID_10 | max_right_front_elbow_wrist_toetip   | 88.75873999 |
| 0days  | ID_11 | max_right_front_elbow_wrist_toetip   | 86.57834199 |
| 0days  | ID_12 | max_right_front_elbow_wrist_toetip   | 96.54917803 |
| 0days  | ID_13 | max_right_front_elbow_wrist_toetip   | 104.4515338 |
| 3days  | ID_1  | max_right_front_elbow_wrist_toetip   | 98.54918166 |
| 3days  | ID_2  | max_right_front_elbow_wrist_toetip   | 99.12041589 |
| 3days  | ID_3  | max_right_front_elbow_wrist_toetip   | 82.8112308  |
| 3days  | ID_4  | max_right_front_elbow_wrist_toetip   | 92.36834177 |
| 3days  | ID_5  | max_right_front_elbow_wrist_toetip   | 96.04177349 |
| 3days  | ID_6  | max_right_front_elbow_wrist_toetip   | 82.71672841 |
| 3days  | ID_7  | max_right_front_elbow_wrist_toetip   | 92.41954918 |
| 3days  | ID_8  | max_right_front_elbow_wrist_toetip   | 100.5168292 |
| 7days  | ID_1  | max_right_front_elbow_wrist_toetip   | 82.28177006 |
| 7days  | ID_2  | max_right_front_elbow_wrist_toetip   | 77.81775026 |
| 7days  | ID_3  | max_right_front_elbow_wrist_toetip   | 96.65081218 |
| 7days  | ID_4  | max_right_front_elbow_wrist_toetip   | 100.5536034 |
| 7days  | ID_5  | max_right_front_elbow_wrist_toetip   | 109.0033982 |
| 7days  | ID_6  | max_right_front_elbow_wrist_toetip   | 93.83449558 |
| 7days  | ID_7  | max_right_front_elbow_wrist_toetip   | 107.8572129 |
| 7days  | ID_8  | max_right_front_elbow_wrist_toetip   | 91.21495971 |
| 7days  | ID_9  | max_right_front_elbow_wrist_toetip   | 105.9094185 |
| 14days | ID_1  | max_right_front_elbow_wrist_toetip   | 100.277387  |
| 14days | ID_2  | max_right_front_elbow_wrist_toetip   | 103.7613447 |
| 14days | ID_3  | max_right_front_elbow_wrist_toetip   | 68.21320466 |
| 14days | ID_4  | max_right_front_elbow_wrist_toetip   | 101.5115169 |
| 14days | ID_5  | max_right_front_elbow_wrist_toetip   | 98.65636688 |
| 14days | ID_6  | max_right_front_elbow_wrist_toetip   | 99.92760486 |
| 14days | ID_7  | max_right_front_elbow_wrist_toetip   | 112.1650696 |
| 14days | ID_8  | max_right_front_elbow_wrist_toetip   | 93.97238681 |
| 14days | ID_9  | max_right_front_elbow_wrist_toetip   | 109.3471815 |
| 14days | ID_10 | max_right_front_elbow_wrist_toetip   | 104.1243676 |
| 14days | ID_11 | max_right_front_elbow_wrist_toetip   | 96.04925953 |
| 21days | ID_1  | max_right_front_elbow_wrist_toetip   | 84.35084646 |
| 21days | ID_2  | max_right_front_elbow_wrist_toetip   | 107.2040119 |
| 21days | ID_3  | max_right_front_elbow_wrist_toetip   | 89.27738323 |
| 21days | ID_4  | max_right_front_elbow_wrist_toetip   | 108.8625753 |
| 21days | ID_5  | max_right_front_elbow_wrist_toetip   | 92.95017037 |
| 21days | ID_6  | max_right_front_elbow_wrist_toetip   | 107.0054988 |
| 21days | ID_7  | max_right_front_elbow_wrist_toetip   | 110.2696775 |
| 21days | ID_8  | max_right_front_elbow_wrist_toetip   | 105.3672396 |
| 21days | ID_9  | max_right_front_elbow_wrist_toetip   | 93.63894942 |
| 21days | ID_10 | max_right_front_elbow_wrist_toetip   | 105.2930821 |
| 0days  | ID_1  | max_right_front_shoulder_elbow_wrist | 92.78129787 |



|        |       |                                      |             |
|--------|-------|--------------------------------------|-------------|
| 0days  | ID_2  | max_right_front_shoulder_elbow_wrist | 97.63453396 |
| 0days  | ID_3  | max_right_front_shoulder_elbow_wrist | 97.41524957 |
| 0days  | ID_4  | max_right_front_shoulder_elbow_wrist | 100.5802426 |
| 0days  | ID_5  | max_right_front_shoulder_elbow_wrist | 93.68928193 |
| 0days  | ID_6  | max_right_front_shoulder_elbow_wrist | 104.9450912 |
| 0days  | ID_7  | max_right_front_shoulder_elbow_wrist | 86.43819261 |
| 0days  | ID_8  | max_right_front_shoulder_elbow_wrist | 96.18107262 |
| 0days  | ID_9  | max_right_front_shoulder_elbow_wrist | 104.4692796 |
| 0days  | ID_10 | max_right_front_shoulder_elbow_wrist | 98.35556161 |
| 0days  | ID_11 | max_right_front_shoulder_elbow_wrist | 98.79397534 |
| 0days  | ID_12 | max_right_front_shoulder_elbow_wrist | 95.66104579 |
| 0days  | ID_13 | max_right_front_shoulder_elbow_wrist | 102.9404682 |
| 3days  | ID_1  | max_right_front_shoulder_elbow_wrist | 99.92582509 |
| 3days  | ID_2  | max_right_front_shoulder_elbow_wrist | 106.6574159 |
| 3days  | ID_3  | max_right_front_shoulder_elbow_wrist | 95.97237495 |
| 3days  | ID_4  | max_right_front_shoulder_elbow_wrist | 101.77282   |
| 3days  | ID_5  | max_right_front_shoulder_elbow_wrist | 105.8384717 |
| 3days  | ID_6  | max_right_front_shoulder_elbow_wrist | 99.98260491 |
| 3days  | ID_7  | max_right_front_shoulder_elbow_wrist | 82.91539274 |
| 3days  | ID_8  | max_right_front_shoulder_elbow_wrist | 95.89536911 |
| 7days  | ID_1  | max_right_front_shoulder_elbow_wrist | 91.74715648 |
| 7days  | ID_2  | max_right_front_shoulder_elbow_wrist | 99.7368484  |
| 7days  | ID_3  | max_right_front_shoulder_elbow_wrist | 104.1167479 |
| 7days  | ID_4  | max_right_front_shoulder_elbow_wrist | 100.4532928 |
| 7days  | ID_5  | max_right_front_shoulder_elbow_wrist | 88.8668416  |
| 7days  | ID_6  | max_right_front_shoulder_elbow_wrist | 99.89928787 |
| 7days  | ID_7  | max_right_front_shoulder_elbow_wrist | 84.19134761 |
| 7days  | ID_8  | max_right_front_shoulder_elbow_wrist | 104.7109843 |
| 7days  | ID_9  | max_right_front_shoulder_elbow_wrist | 85.80438216 |
| 14days | ID_1  | max_right_front_shoulder_elbow_wrist | 98.13646818 |
| 14days | ID_2  | max_right_front_shoulder_elbow_wrist | 92.27651552 |
| 14days | ID_3  | max_right_front_shoulder_elbow_wrist | 95.8072057  |
| 14days | ID_4  | max_right_front_shoulder_elbow_wrist | 79.09497643 |
| 14days | ID_5  | max_right_front_shoulder_elbow_wrist | 77.0886452  |
| 14days | ID_6  | max_right_front_shoulder_elbow_wrist | 101.5909612 |
| 14days | ID_7  | max_right_front_shoulder_elbow_wrist | 103.7774518 |
| 14days | ID_8  | max_right_front_shoulder_elbow_wrist | 101.623618  |
| 14days | ID_9  | max_right_front_shoulder_elbow_wrist | 89.51785551 |
| 14days | ID_10 | max_right_front_shoulder_elbow_wrist | 93.877852   |
| 14days | ID_11 | max_right_front_shoulder_elbow_wrist | 109.7220009 |
| 21days | ID_1  | max_right_front_shoulder_elbow_wrist | 96.22340739 |
| 21days | ID_2  | max_right_front_shoulder_elbow_wrist | 83.83375309 |
| 21days | ID_3  | max_right_front_shoulder_elbow_wrist | 91.94362043 |
| 21days | ID_4  | max_right_front_shoulder_elbow_wrist | 83.9856519  |
| 21days | ID_5  | max_right_front_shoulder_elbow_wrist | 106.0741007 |
| 21days | ID_6  | max_right_front_shoulder_elbow_wrist | 86.65861773 |
| 21days | ID_7  | max_right_front_shoulder_elbow_wrist | 90.2682807  |
| 21days | ID_8  | max_right_front_shoulder_elbow_wrist | 101.844095  |

|        |       |                                      |             |
|--------|-------|--------------------------------------|-------------|
| 21days | ID_9  | max_right_front_shoulder_elbow_wrist | 97.15777285 |
| 21days | ID_10 | max_right_front_shoulder_elbow_wrist | 96.1437489  |
| 0days  | ID_1  | min_left_back_hip_ankle_toe          | 147.0412207 |
| 0days  | ID_2  | min_left_back_hip_ankle_toe          | 145.978783  |
| 0days  | ID_3  | min_left_back_hip_ankle_toe          | 120.1431936 |
| 0days  | ID_4  | min_left_back_hip_ankle_toe          | 139.3240292 |
| 0days  | ID_5  | min_left_back_hip_ankle_toe          | 139.2348709 |
| 0days  | ID_6  | min_left_back_hip_ankle_toe          | 149.1721694 |
| 0days  | ID_7  | min_left_back_hip_ankle_toe          | 138.6449589 |
| 0days  | ID_8  | min_left_back_hip_ankle_toe          | 150.3085489 |
| 0days  | ID_9  | min_left_back_hip_ankle_toe          | 132.692295  |
| 0days  | ID_10 | min_left_back_hip_ankle_toe          | 140.0301931 |
| 0days  | ID_11 | min_left_back_hip_ankle_toe          | 155.1288184 |
| 0days  | ID_12 | min_left_back_hip_ankle_toe          | 147.809568  |
| 0days  | ID_13 | min_left_back_hip_ankle_toe          | 151.6148064 |
| 3days  | ID_1  | min_left_back_hip_ankle_toe          | 145.7085498 |
| 3days  | ID_2  | min_left_back_hip_ankle_toe          | 132.4933488 |
| 3days  | ID_3  | min_left_back_hip_ankle_toe          | 136.9114195 |
| 3days  | ID_4  | min_left_back_hip_ankle_toe          | 143.8136867 |
| 3days  | ID_5  | min_left_back_hip_ankle_toe          | 149.3277455 |
| 3days  | ID_6  | min_left_back_hip_ankle_toe          | 148.5041428 |
| 3days  | ID_7  | min_left_back_hip_ankle_toe          | 121.7562151 |
| 3days  | ID_8  | min_left_back_hip_ankle_toe          | 151.7270164 |
| 7days  | ID_1  | min_left_back_hip_ankle_toe          | 143.9241946 |
| 7days  | ID_2  | min_left_back_hip_ankle_toe          | 151.217144  |
| 7days  | ID_3  | min_left_back_hip_ankle_toe          | 138.5545709 |
| 7days  | ID_4  | min_left_back_hip_ankle_toe          | 149.3910072 |
| 7days  | ID_5  | min_left_back_hip_ankle_toe          | 137.2258423 |
| 7days  | ID_6  | min_left_back_hip_ankle_toe          | 151.2679264 |
| 7days  | ID_7  | min_left_back_hip_ankle_toe          | 130.0495142 |
| 7days  | ID_8  | min_left_back_hip_ankle_toe          | 151.5681176 |
| 7days  | ID_9  | min_left_back_hip_ankle_toe          | 135.8193939 |
| 14days | ID_1  | min_left_back_hip_ankle_toe          | 123.3397087 |
| 14days | ID_2  | min_left_back_hip_ankle_toe          | 125.2653653 |
| 14days | ID_3  | min_left_back_hip_ankle_toe          | 148.2992027 |
| 14days | ID_4  | min_left_back_hip_ankle_toe          | 125.0830137 |
| 14days | ID_5  | min_left_back_hip_ankle_toe          | 123.9229151 |
| 14days | ID_6  | min_left_back_hip_ankle_toe          | 133.9349623 |
| 14days | ID_7  | min_left_back_hip_ankle_toe          | 146.3442794 |
| 14days | ID_8  | min_left_back_hip_ankle_toe          | 152.5210301 |
| 14days | ID_9  | min_left_back_hip_ankle_toe          | 139.9180621 |
| 14days | ID_10 | min_left_back_hip_ankle_toe          | 134.163788  |
| 14days | ID_11 | min_left_back_hip_ankle_toe          | 150.7651374 |
| 21days | ID_1  | min_left_back_hip_ankle_toe          | 147.0323842 |
| 21days | ID_2  | min_left_back_hip_ankle_toe          | 142.5949188 |
| 21days | ID_3  | min_left_back_hip_ankle_toe          | 139.6556164 |
| 21days | ID_4  | min_left_back_hip_ankle_toe          | 126.163333  |
| 21days | ID_5  | min_left_back_hip_ankle_toe          | 138.2883367 |

|        |       |                                    |             |
|--------|-------|------------------------------------|-------------|
| 21days | ID_6  | min__left__back__hip__ankle__toe   | 126.9477694 |
| 21days | ID_7  | min__left__back__hip__ankle__toe   | 130.5556982 |
| 21days | ID_8  | min__left__back__hip__ankle__toe   | 151.9466522 |
| 21days | ID_9  | min__left__back__hip__ankle__toe   | 149.1913322 |
| 21days | ID_10 | min__left__back__hip__ankle__toe   | 145.8561784 |
| 0days  | ID_1  | min__left__back__iliac__hip__ankle | 164.6210857 |
| 0days  | ID_2  | min__left__back__iliac__hip__ankle | 163.6421312 |
| 0days  | ID_3  | min__left__back__iliac__hip__ankle | 165.8535725 |
| 0days  | ID_4  | min__left__back__iliac__hip__ankle | 163.5440885 |
| 0days  | ID_5  | min__left__back__iliac__hip__ankle | 168.5864692 |
| 0days  | ID_6  | min__left__back__iliac__hip__ankle | 165.7297628 |
| 0days  | ID_7  | min__left__back__iliac__hip__ankle | 163.6402368 |
| 0days  | ID_8  | min__left__back__iliac__hip__ankle | 170.6709701 |
| 0days  | ID_9  | min__left__back__iliac__hip__ankle | 155.8743763 |
| 0days  | ID_10 | min__left__back__iliac__hip__ankle | 170.6238285 |
| 0days  | ID_11 | min__left__back__iliac__hip__ankle | 178.8308243 |
| 0days  | ID_12 | min__left__back__iliac__hip__ankle | 161.273217  |
| 0days  | ID_13 | min__left__back__iliac__hip__ankle | 161.2293732 |
| 3days  | ID_1  | min__left__back__iliac__hip__ankle | 171.7858811 |
| 3days  | ID_2  | min__left__back__iliac__hip__ankle | 168.7570161 |
| 3days  | ID_3  | min__left__back__iliac__hip__ankle | 184.1085158 |
| 3days  | ID_4  | min__left__back__iliac__hip__ankle | 168.6934658 |
| 3days  | ID_5  | min__left__back__iliac__hip__ankle | 166.8368813 |
| 3days  | ID_6  | min__left__back__iliac__hip__ankle | 176.4547118 |
| 3days  | ID_7  | min__left__back__iliac__hip__ankle | 176.0680471 |
| 3days  | ID_8  | min__left__back__iliac__hip__ankle | 174.815604  |
| 7days  | ID_1  | min__left__back__iliac__hip__ankle | 179.8671498 |
| 7days  | ID_2  | min__left__back__iliac__hip__ankle | 177.4249699 |
| 7days  | ID_3  | min__left__back__iliac__hip__ankle | 173.041342  |
| 7days  | ID_4  | min__left__back__iliac__hip__ankle | 167.9842361 |
| 7days  | ID_5  | min__left__back__iliac__hip__ankle | 167.4127881 |
| 7days  | ID_6  | min__left__back__iliac__hip__ankle | 176.5534784 |
| 7days  | ID_7  | min__left__back__iliac__hip__ankle | 169.0594087 |
| 7days  | ID_8  | min__left__back__iliac__hip__ankle | 173.0691147 |
| 7days  | ID_9  | min__left__back__iliac__hip__ankle | 169.5393214 |
| 14days | ID_1  | min__left__back__iliac__hip__ankle | 170.028497  |
| 14days | ID_2  | min__left__back__iliac__hip__ankle | 173.4257797 |
| 14days | ID_3  | min__left__back__iliac__hip__ankle | 185.9926747 |
| 14days | ID_4  | min__left__back__iliac__hip__ankle | 171.4087567 |
| 14days | ID_5  | min__left__back__iliac__hip__ankle | 173.3833956 |
| 14days | ID_6  | min__left__back__iliac__hip__ankle | 166.4887985 |
| 14days | ID_7  | min__left__back__iliac__hip__ankle | 164.1716742 |
| 14days | ID_8  | min__left__back__iliac__hip__ankle | 170.9004482 |
| 14days | ID_9  | min__left__back__iliac__hip__ankle | 170.788648  |
| 14days | ID_10 | min__left__back__iliac__hip__ankle | 175.9657905 |
| 14days | ID_11 | min__left__back__iliac__hip__ankle | 167.2471454 |
| 21days | ID_1  | min__left__back__iliac__hip__ankle | 173.9259527 |
| 21days | ID_2  | min__left__back__iliac__hip__ankle | 166.0741409 |

|        |       |                                        |             |
|--------|-------|----------------------------------------|-------------|
| 21days | ID_3  | min__left__back__iliac__hip__ankle     | 171.9912105 |
| 21days | ID_4  | min__left__back__iliac__hip__ankle     | 167.556084  |
| 21days | ID_5  | min__left__back__iliac__hip__ankle     | 168.0364067 |
| 21days | ID_6  | min__left__back__iliac__hip__ankle     | 163.2132321 |
| 21days | ID_7  | min__left__back__iliac__hip__ankle     | 162.280375  |
| 21days | ID_8  | min__left__back__iliac__hip__ankle     | 166.7748447 |
| 21days | ID_9  | min__left__back__iliac__hip__ankle     | 167.0039304 |
| 21days | ID_10 | min__left__back__iliac__hip__ankle     | 166.1222    |
| 0days  | ID_1  | min__left__front__elbow__wrist__toetip | 190.6963804 |
| 0days  | ID_2  | min__left__front__elbow__wrist__toetip | 184.949143  |
| 0days  | ID_3  | min__left__front__elbow__wrist__toetip | 166.4973578 |
| 0days  | ID_4  | min__left__front__elbow__wrist__toetip | 186.4425396 |
| 0days  | ID_5  | min__left__front__elbow__wrist__toetip | 183.1381513 |
| 0days  | ID_6  | min__left__front__elbow__wrist__toetip | 189.2530872 |
| 0days  | ID_7  | min__left__front__elbow__wrist__toetip | 174.9726881 |
| 0days  | ID_8  | min__left__front__elbow__wrist__toetip | 186.6502383 |
| 0days  | ID_9  | min__left__front__elbow__wrist__toetip | 179.6208628 |
| 0days  | ID_10 | min__left__front__elbow__wrist__toetip | 175.4246851 |
| 0days  | ID_11 | min__left__front__elbow__wrist__toetip | 177.9955273 |
| 0days  | ID_12 | min__left__front__elbow__wrist__toetip | 185.889003  |
| 0days  | ID_13 | min__left__front__elbow__wrist__toetip | 199.5761567 |
| 3days  | ID_1  | min__left__front__elbow__wrist__toetip | 182.773857  |
| 3days  | ID_2  | min__left__front__elbow__wrist__toetip | 178.1527578 |
| 3days  | ID_3  | min__left__front__elbow__wrist__toetip | 167.2368804 |
| 3days  | ID_4  | min__left__front__elbow__wrist__toetip | 168.1945912 |
| 3days  | ID_5  | min__left__front__elbow__wrist__toetip | 185.2736523 |
| 3days  | ID_6  | min__left__front__elbow__wrist__toetip | 162.7330485 |
| 3days  | ID_7  | min__left__front__elbow__wrist__toetip | 165.3021763 |
| 3days  | ID_8  | min__left__front__elbow__wrist__toetip | 181.0537716 |
| 7days  | ID_1  | min__left__front__elbow__wrist__toetip | 167.6104371 |
| 7days  | ID_2  | min__left__front__elbow__wrist__toetip | 178.8125769 |
| 7days  | ID_3  | min__left__front__elbow__wrist__toetip | 182.3836035 |
| 7days  | ID_4  | min__left__front__elbow__wrist__toetip | 186.3958372 |
| 7days  | ID_5  | min__left__front__elbow__wrist__toetip | 165.5964541 |
| 7days  | ID_6  | min__left__front__elbow__wrist__toetip | 186.8359075 |
| 7days  | ID_7  | min__left__front__elbow__wrist__toetip | 175.577155  |
| 7days  | ID_8  | min__left__front__elbow__wrist__toetip | 180.1725916 |
| 7days  | ID_9  | min__left__front__elbow__wrist__toetip | 167.2945748 |
| 14days | ID_1  | min__left__front__elbow__wrist__toetip | 157.5877504 |
| 14days | ID_2  | min__left__front__elbow__wrist__toetip | 161.0129519 |
| 14days | ID_3  | min__left__front__elbow__wrist__toetip | 166.1516207 |
| 14days | ID_4  | min__left__front__elbow__wrist__toetip | 162.1183818 |
| 14days | ID_5  | min__left__front__elbow__wrist__toetip | 158.9915776 |
| 14days | ID_6  | min__left__front__elbow__wrist__toetip | 179.6207762 |
| 14days | ID_7  | min__left__front__elbow__wrist__toetip | 182.464194  |
| 14days | ID_8  | min__left__front__elbow__wrist__toetip | 192.8429763 |
| 14days | ID_9  | min__left__front__elbow__wrist__toetip | 158.2858851 |
| 14days | ID_10 | min__left__front__elbow__wrist__toetip | 158.505806  |

|        |       |                                     |             |
|--------|-------|-------------------------------------|-------------|
| 14days | ID_11 | min_left_front_elbow_wrist_toetip   | 169.6498049 |
| 21days | ID_1  | min_left_front_elbow_wrist_toetip   | 173.5109729 |
| 21days | ID_2  | min_left_front_elbow_wrist_toetip   | 155.099008  |
| 21days | ID_3  | min_left_front_elbow_wrist_toetip   | 194.0440285 |
| 21days | ID_4  | min_left_front_elbow_wrist_toetip   | 157.2325801 |
| 21days | ID_5  | min_left_front_elbow_wrist_toetip   | 181.7846292 |
| 21days | ID_6  | min_left_front_elbow_wrist_toetip   | 155.1752468 |
| 21days | ID_7  | min_left_front_elbow_wrist_toetip   | 162.8179563 |
| 21days | ID_8  | min_left_front_elbow_wrist_toetip   | 188.0455322 |
| 21days | ID_9  | min_left_front_elbow_wrist_toetip   | 186.4701767 |
| 21days | ID_10 | min_left_front_elbow_wrist_toetip   | 189.4067468 |
| 0days  | ID_1  | min_left_front_shoulder_elbow_wrist | 159.4007057 |
| 0days  | ID_2  | min_left_front_shoulder_elbow_wrist | 159.0398387 |
| 0days  | ID_3  | min_left_front_shoulder_elbow_wrist | 169.0967875 |
| 0days  | ID_4  | min_left_front_shoulder_elbow_wrist | 159.1771127 |
| 0days  | ID_5  | min_left_front_shoulder_elbow_wrist | 160.6846703 |
| 0days  | ID_6  | min_left_front_shoulder_elbow_wrist | 168.3004372 |
| 0days  | ID_7  | min_left_front_shoulder_elbow_wrist | 154.3385826 |
| 0days  | ID_8  | min_left_front_shoulder_elbow_wrist | 158.5790006 |
| 0days  | ID_9  | min_left_front_shoulder_elbow_wrist | 157.3644562 |
| 0days  | ID_10 | min_left_front_shoulder_elbow_wrist | 157.2528986 |
| 0days  | ID_11 | min_left_front_shoulder_elbow_wrist | 178.1307668 |
| 0days  | ID_12 | min_left_front_shoulder_elbow_wrist | 160.2604429 |
| 0days  | ID_13 | min_left_front_shoulder_elbow_wrist | 161.6050236 |
| 3days  | ID_1  | min_left_front_shoulder_elbow_wrist | 160.3175702 |
| 3days  | ID_2  | min_left_front_shoulder_elbow_wrist | 168.6898251 |
| 3days  | ID_3  | min_left_front_shoulder_elbow_wrist | 174.4881478 |
| 3days  | ID_4  | min_left_front_shoulder_elbow_wrist | 171.0912211 |
| 3days  | ID_5  | min_left_front_shoulder_elbow_wrist | 170.3889173 |
| 3days  | ID_6  | min_left_front_shoulder_elbow_wrist | 173.6895015 |
| 3days  | ID_7  | min_left_front_shoulder_elbow_wrist | 168.9631246 |
| 3days  | ID_8  | min_left_front_shoulder_elbow_wrist | 163.0139214 |
| 7days  | ID_1  | min_left_front_shoulder_elbow_wrist | 179.27291   |
| 7days  | ID_2  | min_left_front_shoulder_elbow_wrist | 161.1427312 |
| 7days  | ID_3  | min_left_front_shoulder_elbow_wrist | 163.5644764 |
| 7days  | ID_4  | min_left_front_shoulder_elbow_wrist | 164.8556868 |
| 7days  | ID_5  | min_left_front_shoulder_elbow_wrist | 174.7093452 |
| 7days  | ID_6  | min_left_front_shoulder_elbow_wrist | 165.2443637 |
| 7days  | ID_7  | min_left_front_shoulder_elbow_wrist | 172.8900061 |
| 7days  | ID_8  | min_left_front_shoulder_elbow_wrist | 162.6271194 |
| 7days  | ID_9  | min_left_front_shoulder_elbow_wrist | 175.5311295 |
| 14days | ID_1  | min_left_front_shoulder_elbow_wrist | 176.4368758 |
| 14days | ID_2  | min_left_front_shoulder_elbow_wrist | 175.7049537 |
| 14days | ID_3  | min_left_front_shoulder_elbow_wrist | 179.6366167 |
| 14days | ID_4  | min_left_front_shoulder_elbow_wrist | 169.305756  |
| 14days | ID_5  | min_left_front_shoulder_elbow_wrist | 173.8749867 |
| 14days | ID_6  | min_left_front_shoulder_elbow_wrist | 165.832295  |
| 14days | ID_7  | min_left_front_shoulder_elbow_wrist | 156.5270369 |

|        |       |                                     |             |
|--------|-------|-------------------------------------|-------------|
| 14days | ID_8  | min_left_front_shoulder_elbow_wrist | 160.4084698 |
| 14days | ID_9  | min_left_front_shoulder_elbow_wrist | 176.1660423 |
| 14days | ID_10 | min_left_front_shoulder_elbow_wrist | 171.5972762 |
| 14days | ID_11 | min_left_front_shoulder_elbow_wrist | 164.6457876 |
| 21days | ID_1  | min_left_front_shoulder_elbow_wrist | 175.6742946 |
| 21days | ID_2  | min_left_front_shoulder_elbow_wrist | 168.382931  |
| 21days | ID_3  | min_left_front_shoulder_elbow_wrist | 156.4274699 |
| 21days | ID_4  | min_left_front_shoulder_elbow_wrist | 173.549149  |
| 21days | ID_5  | min_left_front_shoulder_elbow_wrist | 170.8004995 |
| 21days | ID_6  | min_left_front_shoulder_elbow_wrist | 180.6563487 |
| 21days | ID_7  | min_left_front_shoulder_elbow_wrist | 169.3810777 |
| 21days | ID_8  | min_left_front_shoulder_elbow_wrist | 159.6027987 |
| 21days | ID_9  | min_left_front_shoulder_elbow_wrist | 162.9043    |
| 21days | ID_10 | min_left_front_shoulder_elbow_wrist | 161.3284819 |
| 0days  | ID_1  | min_right_back_hip_ankle_toe        | 137.566607  |
| 0days  | ID_2  | min_right_back_hip_ankle_toe        | 144.436746  |
| 0days  | ID_3  | min_right_back_hip_ankle_toe        | 118.2785234 |
| 0days  | ID_4  | min_right_back_hip_ankle_toe        | 127.8559332 |
| 0days  | ID_5  | min_right_back_hip_ankle_toe        | 124.2762428 |
| 0days  | ID_6  | min_right_back_hip_ankle_toe        | 145.8065366 |
| 0days  | ID_7  | min_right_back_hip_ankle_toe        | 145.7821659 |
| 0days  | ID_8  | min_right_back_hip_ankle_toe        | 152.1876887 |
| 0days  | ID_9  | min_right_back_hip_ankle_toe        | 139.9501295 |
| 0days  | ID_10 | min_right_back_hip_ankle_toe        | 127.748874  |
| 0days  | ID_11 | min_right_back_hip_ankle_toe        | 126.9095843 |
| 0days  | ID_12 | min_right_back_hip_ankle_toe        | 138.013383  |
| 0days  | ID_13 | min_right_back_hip_ankle_toe        | 155.2297325 |
| 3days  | ID_1  | min_right_back_hip_ankle_toe        | 132.0886164 |
| 3days  | ID_2  | min_right_back_hip_ankle_toe        | 125.5735534 |
| 3days  | ID_3  | min_right_back_hip_ankle_toe        | 116.0563943 |
| 3days  | ID_4  | min_right_back_hip_ankle_toe        | 127.6385145 |
| 3days  | ID_5  | min_right_back_hip_ankle_toe        | 136.7274602 |
| 3days  | ID_6  | min_right_back_hip_ankle_toe        | 120.4866862 |
| 3days  | ID_7  | min_right_back_hip_ankle_toe        | 144.2561887 |
| 3days  | ID_8  | min_right_back_hip_ankle_toe        | 132.637952  |
| 7days  | ID_1  | min_right_back_hip_ankle_toe        | 126.2641575 |
| 7days  | ID_2  | min_right_back_hip_ankle_toe        | 122.3565674 |
| 7days  | ID_3  | min_right_back_hip_ankle_toe        | 119.9246068 |
| 7days  | ID_4  | min_right_back_hip_ankle_toe        | 137.2615942 |
| 7days  | ID_5  | min_right_back_hip_ankle_toe        | 146.8664482 |
| 7days  | ID_6  | min_right_back_hip_ankle_toe        | 134.900534  |
| 7days  | ID_7  | min_right_back_hip_ankle_toe        | 155.1670414 |
| 7days  | ID_8  | min_right_back_hip_ankle_toe        | 134.4494994 |
| 7days  | ID_9  | min_right_back_hip_ankle_toe        | 152.1363313 |
| 14days | ID_1  | min_right_back_hip_ankle_toe        | 139.1109345 |
| 14days | ID_2  | min_right_back_hip_ankle_toe        | 151.4425914 |
| 14days | ID_3  | min_right_back_hip_ankle_toe        | 126.8615427 |
| 14days | ID_4  | min_right_back_hip_ankle_toe        | 147.9064403 |

|        |       |                                |             |
|--------|-------|--------------------------------|-------------|
| 14days | ID_5  | min_right_back_hip_ankle_toe   | 148.7383313 |
| 14days | ID_6  | min_right_back_hip_ankle_toe   | 124.8138493 |
| 14days | ID_7  | min_right_back_hip_ankle_toe   | 140.035204  |
| 14days | ID_8  | min_right_back_hip_ankle_toe   | 269.3681928 |
| 14days | ID_9  | min_right_back_hip_ankle_toe   | 145.3913629 |
| 14days | ID_10 | min_right_back_hip_ankle_toe   | 143.9447768 |
| 14days | ID_11 | min_right_back_hip_ankle_toe   | 128.1831943 |
| 21days | ID_1  | min_right_back_hip_ankle_toe   | 141.3016094 |
| 21days | ID_2  | min_right_back_hip_ankle_toe   | 150.3090076 |
| 21days | ID_3  | min_right_back_hip_ankle_toe   | 126.6448869 |
| 21days | ID_4  | min_right_back_hip_ankle_toe   | 147.2348186 |
| 21days | ID_5  | min_right_back_hip_ankle_toe   | 129.7379315 |
| 21days | ID_6  | min_right_back_hip_ankle_toe   | 155.0685307 |
| 21days | ID_7  | min_right_back_hip_ankle_toe   | 145.6272112 |
| 21days | ID_8  | min_right_back_hip_ankle_toe   | 140.070641  |
| 21days | ID_9  | min_right_back_hip_ankle_toe   | 139.5810897 |
| 21days | ID_10 | min_right_back_hip_ankle_toe   | 141.8285164 |
| 0days  | ID_1  | min_right_back_iliac_hip_ankle | 165.2021713 |
| 0days  | ID_2  | min_right_back_iliac_hip_ankle | 157.1508637 |
| 0days  | ID_3  | min_right_back_iliac_hip_ankle | 149.9793554 |
| 0days  | ID_4  | min_right_back_iliac_hip_ankle | 164.5641548 |
| 0days  | ID_5  | min_right_back_iliac_hip_ankle | 164.3973745 |
| 0days  | ID_6  | min_right_back_iliac_hip_ankle | 163.0924444 |
| 0days  | ID_7  | min_right_back_iliac_hip_ankle | 162.1550654 |
| 0days  | ID_8  | min_right_back_iliac_hip_ankle | 160.7031448 |
| 0days  | ID_9  | min_right_back_iliac_hip_ankle | 171.5267003 |
| 0days  | ID_10 | min_right_back_iliac_hip_ankle | 175.4941822 |
| 0days  | ID_11 | min_right_back_iliac_hip_ankle | 172.1369545 |
| 0days  | ID_12 | min_right_back_iliac_hip_ankle | 162.7766401 |
| 0days  | ID_13 | min_right_back_iliac_hip_ankle | 166.4335421 |
| 3days  | ID_1  | min_right_back_iliac_hip_ankle | 184.5324493 |
| 3days  | ID_2  | min_right_back_iliac_hip_ankle | 170.2128867 |
| 3days  | ID_3  | min_right_back_iliac_hip_ankle | 177.9152088 |
| 3days  | ID_4  | min_right_back_iliac_hip_ankle | 175.8283244 |
| 3days  | ID_5  | min_right_back_iliac_hip_ankle | 166.5011262 |
| 3days  | ID_6  | min_right_back_iliac_hip_ankle | 176.135997  |
| 3days  | ID_7  | min_right_back_iliac_hip_ankle | 176.8437227 |
| 3days  | ID_8  | min_right_back_iliac_hip_ankle | 166.1998313 |
| 7days  | ID_1  | min_right_back_iliac_hip_ankle | 179.0141384 |
| 7days  | ID_2  | min_right_back_iliac_hip_ankle | 174.9241482 |
| 7days  | ID_3  | min_right_back_iliac_hip_ankle | 186.82825   |
| 7days  | ID_4  | min_right_back_iliac_hip_ankle | 165.2977495 |
| 7days  | ID_5  | min_right_back_iliac_hip_ankle | 170.3762344 |
| 7days  | ID_6  | min_right_back_iliac_hip_ankle | 161.1185885 |
| 7days  | ID_7  | min_right_back_iliac_hip_ankle | 161.6724177 |
| 7days  | ID_8  | min_right_back_iliac_hip_ankle | 163.4165674 |
| 7days  | ID_9  | min_right_back_iliac_hip_ankle | 170.4908928 |
| 14days | ID_1  | min_right_back_iliac_hip_ankle | 164.4972315 |

|        |       |                                    |             |
|--------|-------|------------------------------------|-------------|
| 14days | ID_2  | min_right_back_iliac_hip_ankle     | 171.1924813 |
| 14days | ID_3  | min_right_back_iliac_hip_ankle     | 181.4079536 |
| 14days | ID_4  | min_right_back_iliac_hip_ankle     | 175.177989  |
| 14days | ID_5  | min_right_back_iliac_hip_ankle     | 175.5167888 |
| 14days | ID_6  | min_right_back_iliac_hip_ankle     | 165.4213545 |
| 14days | ID_7  | min_right_back_iliac_hip_ankle     | 165.6178041 |
| 14days | ID_8  | min_right_back_iliac_hip_ankle     | 161.8336829 |
| 14days | ID_9  | min_right_back_iliac_hip_ankle     | 157.739733  |
| 14days | ID_10 | min_right_back_iliac_hip_ankle     | 168.4328513 |
| 14days | ID_11 | min_right_back_iliac_hip_ankle     | 162.4237469 |
| 21days | ID_1  | min_right_back_iliac_hip_ankle     | 164.9995803 |
| 21days | ID_2  | min_right_back_iliac_hip_ankle     | 166.820456  |
| 21days | ID_3  | min_right_back_iliac_hip_ankle     | 166.6415109 |
| 21days | ID_4  | min_right_back_iliac_hip_ankle     | 169.8237028 |
| 21days | ID_5  | min_right_back_iliac_hip_ankle     | 164.0759398 |
| 21days | ID_6  | min_right_back_iliac_hip_ankle     | 170.1621808 |
| 21days | ID_7  | min_right_back_iliac_hip_ankle     | 167.8193744 |
| 21days | ID_8  | min_right_back_iliac_hip_ankle     | 163.2236519 |
| 21days | ID_9  | min_right_back_iliac_hip_ankle     | 165.9912849 |
| 21days | ID_10 | min_right_back_iliac_hip_ankle     | 160.0504547 |
| 0days  | ID_1  | min_right_front_elbow_wrist_toetip | 170.0339887 |
| 0days  | ID_2  | min_right_front_elbow_wrist_toetip | 166.890535  |
| 0days  | ID_3  | min_right_front_elbow_wrist_toetip | 186.9580726 |
| 0days  | ID_4  | min_right_front_elbow_wrist_toetip | 170.0988295 |
| 0days  | ID_5  | min_right_front_elbow_wrist_toetip | 189.7303798 |
| 0days  | ID_6  | min_right_front_elbow_wrist_toetip | 167.2936008 |
| 0days  | ID_7  | min_right_front_elbow_wrist_toetip | 184.0455259 |
| 0days  | ID_8  | min_right_front_elbow_wrist_toetip | 179.692531  |
| 0days  | ID_9  | min_right_front_elbow_wrist_toetip | 167.26677   |
| 0days  | ID_10 | min_right_front_elbow_wrist_toetip | 174.2524409 |
| 0days  | ID_11 | min_right_front_elbow_wrist_toetip | 169.205196  |
| 0days  | ID_12 | min_right_front_elbow_wrist_toetip | 168.0820087 |
| 0days  | ID_13 | min_right_front_elbow_wrist_toetip | 162.0875121 |
| 3days  | ID_1  | min_right_front_elbow_wrist_toetip | 167.2473128 |
| 3days  | ID_2  | min_right_front_elbow_wrist_toetip | 166.1233948 |
| 3days  | ID_3  | min_right_front_elbow_wrist_toetip | 165.790433  |
| 3days  | ID_4  | min_right_front_elbow_wrist_toetip | 167.2423151 |
| 3days  | ID_5  | min_right_front_elbow_wrist_toetip | 163.0803778 |
| 3days  | ID_6  | min_right_front_elbow_wrist_toetip | 166.4967531 |
| 3days  | ID_7  | min_right_front_elbow_wrist_toetip | 166.8737621 |
| 3days  | ID_8  | min_right_front_elbow_wrist_toetip | 168.8544368 |
| 7days  | ID_1  | min_right_front_elbow_wrist_toetip | 164.5990524 |
| 7days  | ID_2  | min_right_front_elbow_wrist_toetip | 160.0227807 |
| 7days  | ID_3  | min_right_front_elbow_wrist_toetip | 161.5073815 |
| 7days  | ID_4  | min_right_front_elbow_wrist_toetip | 169.8251834 |
| 7days  | ID_5  | min_right_front_elbow_wrist_toetip | 185.6517438 |
| 7days  | ID_6  | min_right_front_elbow_wrist_toetip | 174.5290069 |
| 7days  | ID_7  | min_right_front_elbow_wrist_toetip | 191.3853582 |



|        |       |                                      |             |
|--------|-------|--------------------------------------|-------------|
| 7days  | ID_8  | min_right_front_elbow_wrist_toetip   | 170.9888852 |
| 7days  | ID_9  | min_right_front_elbow_wrist_toetip   | 183.5572218 |
| 14days | ID_1  | min_right_front_elbow_wrist_toetip   | 171.1387231 |
| 14days | ID_2  | min_right_front_elbow_wrist_toetip   | 175.0013657 |
| 14days | ID_3  | min_right_front_elbow_wrist_toetip   | 158.9738122 |
| 14days | ID_4  | min_right_front_elbow_wrist_toetip   | 172.0452112 |
| 14days | ID_5  | min_right_front_elbow_wrist_toetip   | 172.3047269 |
| 14days | ID_6  | min_right_front_elbow_wrist_toetip   | 170.7034391 |
| 14days | ID_7  | min_right_front_elbow_wrist_toetip   | 165.0177694 |
| 14days | ID_8  | min_right_front_elbow_wrist_toetip   | 159.43749   |
| 14days | ID_9  | min_right_front_elbow_wrist_toetip   | 188.2935208 |
| 14days | ID_10 | min_right_front_elbow_wrist_toetip   | 169.8941946 |
| 14days | ID_11 | min_right_front_elbow_wrist_toetip   | 160.6890114 |
| 21days | ID_1  | min_right_front_elbow_wrist_toetip   | 167.8940692 |
| 21days | ID_2  | min_right_front_elbow_wrist_toetip   | 189.3744234 |
| 21days | ID_3  | min_right_front_elbow_wrist_toetip   | 168.1499567 |
| 21days | ID_4  | min_right_front_elbow_wrist_toetip   | 176.5429955 |
| 21days | ID_5  | min_right_front_elbow_wrist_toetip   | 158.7068834 |
| 21days | ID_6  | min_right_front_elbow_wrist_toetip   | 180.7328527 |
| 21days | ID_7  | min_right_front_elbow_wrist_toetip   | 182.5258043 |
| 21days | ID_8  | min_right_front_elbow_wrist_toetip   | 164.3850086 |
| 21days | ID_9  | min_right_front_elbow_wrist_toetip   | 177.4029136 |
| 21days | ID_10 | min_right_front_elbow_wrist_toetip   | 167.3078975 |
| 0days  | ID_1  | min_right_front_shoulder_elbow_wrist | 167.5594076 |
| 0days  | ID_2  | min_right_front_shoulder_elbow_wrist | 165.4411877 |
| 0days  | ID_3  | min_right_front_shoulder_elbow_wrist | 151.7757242 |
| 0days  | ID_4  | min_right_front_shoulder_elbow_wrist | 161.2687298 |
| 0days  | ID_5  | min_right_front_shoulder_elbow_wrist | 172.4710485 |
| 0days  | ID_6  | min_right_front_shoulder_elbow_wrist | 172.0836837 |
| 0days  | ID_7  | min_right_front_shoulder_elbow_wrist | 159.4804423 |
| 0days  | ID_8  | min_right_front_shoulder_elbow_wrist | 158.3577267 |
| 0days  | ID_9  | min_right_front_shoulder_elbow_wrist | 180.7920302 |
| 0days  | ID_10 | min_right_front_shoulder_elbow_wrist | 176.5775949 |
| 0days  | ID_11 | min_right_front_shoulder_elbow_wrist | 166.2460127 |
| 0days  | ID_12 | min_right_front_shoulder_elbow_wrist | 173.117989  |
| 0days  | ID_13 | min_right_front_shoulder_elbow_wrist | 177.5191236 |
| 3days  | ID_1  | min_right_front_shoulder_elbow_wrist | 171.9144366 |
| 3days  | ID_2  | min_right_front_shoulder_elbow_wrist | 162.5037427 |
| 3days  | ID_3  | min_right_front_shoulder_elbow_wrist | 171.4350699 |
| 3days  | ID_4  | min_right_front_shoulder_elbow_wrist | 174.6256185 |
| 3days  | ID_5  | min_right_front_shoulder_elbow_wrist | 175.6781465 |
| 3days  | ID_6  | min_right_front_shoulder_elbow_wrist | 179.0694642 |
| 3days  | ID_7  | min_right_front_shoulder_elbow_wrist | 162.7436089 |
| 3days  | ID_8  | min_right_front_shoulder_elbow_wrist | 172.4220438 |
| 7days  | ID_1  | min_right_front_shoulder_elbow_wrist | 163.5977541 |
| 7days  | ID_2  | min_right_front_shoulder_elbow_wrist | 183.8641945 |
| 7days  | ID_3  | min_right_front_shoulder_elbow_wrist | 165.8388769 |
| 7days  | ID_4  | min_right_front_shoulder_elbow_wrist | 163.5583693 |

|        |       |                                         |             |
|--------|-------|-----------------------------------------|-------------|
| 7days  | ID_5  | min__right__front__shoulder_elbow_wrist | 163.9256761 |
| 7days  | ID_6  | min__right__front__shoulder_elbow_wrist | 175.0210027 |
| 7days  | ID_7  | min__right__front__shoulder_elbow_wrist | 157.5719481 |
| 7days  | ID_8  | min__right__front__shoulder_elbow_wrist | 180.2347552 |
| 7days  | ID_9  | min__right__front__shoulder_elbow_wrist | 167.8046076 |
| 14days | ID_1  | min__right__front__shoulder_elbow_wrist | 170.4457194 |
| 14days | ID_2  | min__right__front__shoulder_elbow_wrist | 175.2760213 |
| 14days | ID_3  | min__right__front__shoulder_elbow_wrist | 187.446569  |
| 14days | ID_4  | min__right__front__shoulder_elbow_wrist | 165.9493805 |
| 14days | ID_5  | min__right__front__shoulder_elbow_wrist | 163.8274377 |
| 14days | ID_6  | min__right__front__shoulder_elbow_wrist | 163.0330161 |
| 14days | ID_7  | min__right__front__shoulder_elbow_wrist | 173.0932763 |
| 14days | ID_8  | min__right__front__shoulder_elbow_wrist | 177.0766709 |
| 14days | ID_9  | min__right__front__shoulder_elbow_wrist | 154.6229821 |
| 14days | ID_10 | min__right__front__shoulder_elbow_wrist | 174.7191183 |
| 14days | ID_11 | min__right__front__shoulder_elbow_wrist | 180.0441825 |
| 21days | ID_1  | min__right__front__shoulder_elbow_wrist | 181.0484775 |
| 21days | ID_2  | min__right__front__shoulder_elbow_wrist | 160.619939  |
| 21days | ID_3  | min__right__front__shoulder_elbow_wrist | 170.9794967 |
| 21days | ID_4  | min__right__front__shoulder_elbow_wrist | 167.0312112 |
| 21days | ID_5  | min__right__front__shoulder_elbow_wrist | 177.8685191 |
| 21days | ID_6  | min__right__front__shoulder_elbow_wrist | 166.3579638 |
| 21days | ID_7  | min__right__front__shoulder_elbow_wrist | 162.4931435 |
| 21days | ID_8  | min__right__front__shoulder_elbow_wrist | 168.1769528 |
| 21days | ID_9  | min__right__front__shoulder_elbow_wrist | 174.1670074 |
| 21days | ID_10 | min__right__front__shoulder_elbow_wrist | 169.8967262 |

**Suppl. Table 26: Summary of side perspective horizontal angles analysis**

| <b>Day</b> | <b>Measure</b>                             | <b>Mean</b> | <b>SD</b>  |
|------------|--------------------------------------------|-------------|------------|
| 0days      | avg_Angle_left_back_hip_ankle_toe          | 119.111343  | 8.65844201 |
| 0days      | avg_Angle_left_back_iliac_hip_ankle        | 138.043236  | 7.57301528 |
| 0days      | avg_Angle_left_front_elbow_wrist_toetip    | 145.592204  | 7.90188404 |
| 0days      | avg_Angle_left_front_shoulder_elbow_wrist  | 120.525495  | 6.21804693 |
| 0days      | avg_Angle_right_back_hip_ankle_toe         | 115.91592   | 6.76303026 |
| 0days      | avg_Angle_right_back_iliac_hip_ankle       | 138.815259  | 4.3619968  |
| 0days      | avg_Angle_right_front_elbow_wrist_toetip   | 142.740176  | 4.03154536 |
| 0days      | avg_Angle_right_front_shoulder_elbow_wrist | 122.341684  | 6.47474687 |
| 0days      | max_left_back_hip_ankle_toe                | 103.136897  | 9.78782328 |
| 0days      | max_left_back_iliac_hip_ankle              | 115.876492  | 4.64422425 |
| 0days      | max_left_front_elbow_wrist_toetip          | 111.590846  | 5.6784448  |
| 0days      | max_left_front_shoulder_elbow_wrist        | 90.8479695  | 7.73242322 |
| 0days      | max_right_back_hip_ankle_toe               | 100.827981  | 7.11727027 |
| 0days      | max_right_back_iliac_hip_ankle             | 115.151799  | 3.8553309  |
| 0days      | max_right_front_elbow_wrist_toetip         | 104.438727  | 9.88292302 |
| 0days      | max_right_front_shoulder_elbow_wrist       | 97.6834841  | 5.07734702 |
| 0days      | min_left_back_hip_ankle_toe                | 142.85565   | 9.3320989  |
| 0days      | min_left_back_iliac_hip_ankle              | 165.701534  | 5.62838471 |
| 0days      | min_left_front_elbow_wrist_toetip          | 183.161986  | 8.3702189  |
| 0days      | min_left_front_shoulder_elbow_wrist        | 161.786979  | 6.40634549 |
| 0days      | min_right_back_hip_ankle_toe               | 137.234011  | 11.4226258 |
| 0days      | min_right_back_iliac_hip_ankle             | 164.277892  | 6.59481822 |
| 0days      | min_right_front_elbow_wrist_toetip         | 173.510569  | 8.74332525 |
| 0days      | min_right_front_shoulder_elbow_wrist       | 167.899285  | 8.53651527 |
| 3days      | avg_Angle_left_back_hip_ankle_toe          | 115.817149  | 8.18087786 |
| 3days      | avg_Angle_left_back_iliac_hip_ankle        | 148.784818  | 13.6262678 |
| 3days      | avg_Angle_left_front_elbow_wrist_toetip    | 137.146706  | 8.55788941 |
| 3days      | avg_Angle_left_front_shoulder_elbow_wrist  | 123.470624  | 2.82184551 |
| 3days      | avg_Angle_right_back_hip_ankle_toe         | 107.73194   | 5.57556526 |
| 3days      | avg_Angle_right_back_iliac_hip_ankle       | 151.140887  | 7.30944456 |
| 3days      | avg_Angle_right_front_elbow_wrist_toetip   | 130.652427  | 5.47486517 |
| 3days      | avg_Angle_right_front_shoulder_elbow_wrist | 128.77017   | 3.89044541 |
| 3days      | max_left_back_hip_ankle_toe                | 88.0591755  | 23.4851485 |
| 3days      | max_left_back_iliac_hip_ankle              | 123.818379  | 11.0716034 |
| 3days      | max_left_front_elbow_wrist_toetip          | 99.3332639  | 9.68828038 |
| 3days      | max_left_front_shoulder_elbow_wrist        | 91.8456274  | 5.34602804 |
| 3days      | max_right_back_hip_ankle_toe               | 82.2948522  | 13.1346753 |
| 3days      | max_right_back_iliac_hip_ankle             | 123.110554  | 5.13016493 |
| 3days      | max_right_front_elbow_wrist_toetip         | 93.0680063  | 7.01288227 |
| 3days      | max_right_front_shoulder_elbow_wrist       | 98.6200343  | 7.47640818 |
| 3days      | min_left_back_hip_ankle_toe                | 141.280266  | 10.2091984 |
| 3days      | min_left_back_iliac_hip_ankle              | 173.440015  | 5.63790546 |
| 3days      | min_left_front_elbow_wrist_toetip          | 173.840092  | 8.88748092 |
| 3days      | min_left_front_shoulder_elbow_wrist        | 168.830279  | 4.92077719 |
| 3days      | min_right_back_hip_ankle_toe               | 129.433171  | 9.00274326 |
| 3days      | min_right_back_iliac_hip_ankle             | 174.271193  | 6.2459468  |

|        |                                               |            |            |
|--------|-----------------------------------------------|------------|------------|
| 3days  | min__right__front__elbow_wrist_toetip         | 166.463598 | 1.65275189 |
| 3days  | min__right__front__shoulder_elbow_wrist       | 171.299016 | 5.88986056 |
| 7days  | avg_Angle__left__back__hip_ankle_toe          | 112.959715 | 6.33633335 |
| 7days  | avg_Angle__left__back__iliac_hip_ankle        | 144.638469 | 3.88348317 |
| 7days  | avg_Angle__left__front__elbow_wrist_toetip    | 142.278232 | 7.45072884 |
| 7days  | avg_Angle__left__front__shoulder_elbow_wrist  | 120.921374 | 6.07764475 |
| 7days  | avg_Angle__right__back__hip_ankle_toe         | 113.13123  | 6.67643384 |
| 7days  | avg_Angle__right__back__iliac_hip_ankle       | 137.630599 | 4.42047671 |
| 7days  | avg_Angle__right__front__elbow_wrist_toetip   | 133.550705 | 9.66743436 |
| 7days  | avg_Angle__right__front__shoulder_elbow_wrist | 123.999634 | 6.87872875 |
| 7days  | max__left__back__hip_ankle_toe                | 98.2985251 | 6.8611388  |
| 7days  | max__left__back__iliac_hip_ankle              | 117.080054 | 4.74659798 |
| 7days  | max__left__front__elbow_wrist_toetip          | 100.281581 | 8.33402003 |
| 7days  | max__left__front__shoulder_elbow_wrist        | 90.7396511 | 5.97570012 |
| 7days  | max__right__back__hip_ankle_toe               | 96.7950286 | 6.35387056 |
| 7days  | max__right__back__iliac_hip_ankle             | 113.198636 | 5.27995414 |
| 7days  | max__right__front__elbow_wrist_toetip         | 96.1248245 | 11.0412133 |
| 7days  | max__right__front__shoulder_elbow_wrist       | 95.5029877 | 7.91283351 |
| 7days  | min__left__back__hip_ankle_toe                | 143.22419  | 8.08484991 |
| 7days  | min__left__back__iliac_hip_ankle              | 172.661312 | 4.50303778 |
| 7days  | min__left__front__elbow_wrist_toetip          | 176.742126 | 8.22486184 |
| 7days  | min__left__front__shoulder_elbow_wrist        | 168.870863 | 6.69834259 |
| 7days  | min__right__back__hip_ankle_toe               | 136.591864 | 12.6848151 |
| 7days  | min__right__back__iliac_hip_ankle             | 170.348776 | 8.6722293  |
| 7days  | min__right__front__elbow_wrist_toetip         | 173.562957 | 11.147965  |
| 7days  | min__right__front__shoulder_elbow_wrist       | 169.046354 | 8.73186362 |
| 14days | avg_Angle__left__back__hip_ankle_toe          | 114.360477 | 8.05024414 |
| 14days | avg_Angle__left__back__iliac_hip_ankle        | 143.247298 | 11.2720928 |
| 14days | avg_Angle__left__front__elbow_wrist_toetip    | 134.898125 | 8.5465791  |
| 14days | avg_Angle__left__front__shoulder_elbow_wrist  | 125.61361  | 8.88687637 |
| 14days | avg_Angle__right__back__hip_ankle_toe         | 113.443728 | 6.25543739 |
| 14days | avg_Angle__right__back__iliac_hip_ankle       | 136.725847 | 5.41883874 |
| 14days | avg_Angle__right__front__elbow_wrist_toetip   | 136.363796 | 8.59137686 |
| 14days | avg_Angle__right__front__shoulder_elbow_wrist | 126.390899 | 5.70462638 |
| 14days | max__left__back__hip_ankle_toe                | 97.2532861 | 5.90232909 |
| 14days | max__left__back__iliac_hip_ankle              | 116.619118 | 3.86336044 |
| 14days | max__left__front__elbow_wrist_toetip          | 97.3466441 | 11.2055642 |
| 14days | max__left__front__shoulder_elbow_wrist        | 93.2086971 | 7.91715736 |
| 14days | max__right__back__hip_ankle_toe               | 97.3199391 | 7.35833156 |
| 14days | max__right__back__iliac_hip_ankle             | 112.897125 | 5.82312227 |
| 14days | max__right__front__elbow_wrist_toetip         | 98.9096082 | 11.4889138 |
| 14days | max__right__front__shoulder_elbow_wrist       | 94.7739591 | 10.017674  |
| 14days | min__left__back__hip_ankle_toe                | 136.687042 | 11.4349251 |
| 14days | min__left__back__iliac_hip_ankle              | 171.800146 | 5.7981734  |
| 14days | min__left__front__elbow_wrist_toetip          | 167.930157 | 11.9373203 |
| 14days | min__left__front__shoulder_elbow_wrist        | 170.012372 | 7.36523572 |
| 14days | min__right__back__hip_ankle_toe               | 151.436038 | 40.1940476 |
| 14days | min__right__back__iliac_hip_ankle             | 168.114692 | 7.0499522  |

|        |                                               |            |            |
|--------|-----------------------------------------------|------------|------------|
| 14days | min__right__front__elbow_wrist_toetip         | 169.409024 | 8.43672161 |
| 14days | min__right__front__shoulder_elbow_wrist       | 171.412216 | 9.12569363 |
| 21days | avg_Angle__left__back__hip_ankle_toe          | 119.207483 | 8.35426229 |
| 21days | avg_Angle__left__back__iliac_hip_ankle        | 136.763799 | 3.99494863 |
| 21days | avg_Angle__left__front__elbow_wrist_toetip    | 136.563319 | 11.0291336 |
| 21days | avg_Angle__left__front__shoulder_elbow_wrist  | 124.687829 | 9.08652152 |
| 21days | avg_Angle__right__back__hip_ankle_toe         | 115.083859 | 5.70163392 |
| 21days | avg_Angle__right__back__iliac_hip_ankle       | 134.886993 | 3.72815045 |
| 21days | avg_Angle__right__front__elbow_wrist_toetip   | 135.382457 | 10.1569051 |
| 21days | avg_Angle__right__front__shoulder_elbow_wrist | 126.131297 | 8.48583852 |
| 21days | max__left__back__hip_ankle_toe                | 105.491319 | 10.5303718 |
| 21days | max__left__back__iliac_hip_ankle              | 111.920147 | 4.32213586 |
| 21days | max__left__front__elbow_wrist_toetip          | 101.158653 | 8.43863629 |
| 21days | max__left__front__shoulder_elbow_wrist        | 91.3171268 | 8.64998268 |
| 21days | max__right__back__hip_ankle_toe               | 98.0311178 | 6.13448138 |
| 21days | max__right__back__iliac_hip_ankle             | 113.757365 | 5.85045605 |
| 21days | max__right__front__elbow_wrist_toetip         | 100.421943 | 9.36935615 |
| 21days | max__right__front__shoulder_elbow_wrist       | 93.4133049 | 7.44664291 |
| 21days | min__left__back__hip_ankle_toe                | 139.823222 | 9.25821405 |
| 21days | min__left__back__iliac_hip_ankle              | 167.297838 | 3.52247117 |
| 21days | min__left__front__elbow_wrist_toetip          | 174.358688 | 15.5251392 |
| 21days | min__left__front__shoulder_elbow_wrist        | 167.870735 | 7.70650868 |
| 21days | min__right__back__hip_ankle_toe               | 141.740424 | 8.66628733 |
| 21days | min__right__back__iliac_hip_ankle             | 165.960814 | 3.05745037 |
| 21days | min__right__front__elbow_wrist_toetip         | 173.302281 | 9.4879407  |
| 21days | min__right__front__shoulder_elbow_wrist       | 169.863944 | 6.42798948 |

**Suppl. Table 27: Statistical test of bside perspective horizontal angle analysis**

| Measure                                        | group1 | group2 | p.adj | sig | Test*                  |
|------------------------------------------------|--------|--------|-------|-----|------------------------|
| avg_Angle__left__back__hip__ankle__toe         | 0days  | 3days  | 1     | ns  | Rep ANOVA with PH test |
| avg_Angle__left__back__hip__ankle__toe         | 0days  | 7days  | 1     | ns  | Rep ANOVA with PH test |
| avg_Angle__left__back__hip__ankle__toe         | 0days  | 14days | 1     | ns  | Rep ANOVA with PH test |
| avg_Angle__left__back__hip__ankle__toe         | 0days  | 21days | 1     | ns  | Rep ANOVA with PH test |
| avg_Angle__left__back__iliac__hip__ankle       | 0days  | 3days  | 0.78  | ns  | Rep ANOVA with PH test |
| avg_Angle__left__back__iliac__hip__ankle       | 0days  | 7days  | 1     | ns  | Rep ANOVA with PH test |
| avg_Angle__left__back__iliac__hip__ankle       | 0days  | 14days | 1     | ns  | Rep ANOVA with PH test |
| avg_Angle__left__back__iliac__hip__ankle       | 0days  | 21days | 1     | ns  | Rep ANOVA with PH test |
| avg_Angle__left__front__ellbow__wrist__toetip  | 0days  | 3days  | 0.734 | ns  | Rep ANOVA with PH test |
| avg_Angle__left__front__ellbow__wrist__toetip  | 0days  | 7days  | 0.734 | ns  | Rep ANOVA with PH test |
| avg_Angle__left__front__ellbow__wrist__toetip  | 0days  | 14days | 0.628 | ns  | Rep ANOVA with PH test |
| avg_Angle__left__front__ellbow__wrist__toetip  | 0days  | 21days | 0.734 | ns  | Rep ANOVA with PH test |
| avg_Angle__left__front__shoulder__ellbow__wris | 0days  | 3days  | 1     | ns  | Rep ANOVA with PH test |
| avg_Angle__left__front__shoulder__ellbow__wris | 0days  | 7days  | 1     | ns  | Rep ANOVA with PH test |
| avg_Angle__left__front__shoulder__ellbow__wris | 0days  | 14days | 1     | ns  | Rep ANOVA with PH test |
| avg_Angle__left__front__shoulder__ellbow__wris | 0days  | 21days | 1     | ns  | Rep ANOVA with PH test |
| avg_Angle__right__back__hip__ankle__toe        | 0days  | 3days  | 1     | ns  | Rep ANOVA with PH test |
| avg_Angle__right__back__hip__ankle__toe        | 0days  | 7days  | 1     | ns  | Rep ANOVA with PH test |
| avg_Angle__right__back__hip__ankle__toe        | 0days  | 14days | 1     | ns  | Rep ANOVA with PH test |
| avg_Angle__right__back__hip__ankle__toe        | 0days  | 21days | 1     | ns  | Rep ANOVA with PH test |
| avg_Angle__right__back__iliac__hip__ankle      | 0days  | 3days  | 0.548 | ns  | Rep ANOVA with PH test |
| avg_Angle__right__back__iliac__hip__ankle      | 0days  | 7days  | 1     | ns  | Rep ANOVA with PH test |
| avg_Angle__right__back__iliac__hip__ankle      | 0days  | 14days | 1     | ns  | Rep ANOVA with PH test |
| avg_Angle__right__back__iliac__hip__ankle      | 0days  | 21days | 1     | ns  | Rep ANOVA with PH test |
| avg_Angle__right__front__ellbow__wrist__toetip | 0days  | 3days  | 0.579 | ns  | Rep ANOVA with PH test |
| avg_Angle__right__front__ellbow__wrist__toetip | 0days  | 7days  | 0.752 | ns  | Rep ANOVA with PH test |
| avg_Angle__right__front__ellbow__wrist__toetip | 0days  | 14days | 0.752 | ns  | Rep ANOVA with PH test |
| avg_Angle__right__front__ellbow__wrist__toetip | 0days  | 21days | 0.752 | ns  | Rep ANOVA with PH test |
| avg_Angle__right__front__shoulder__ellbow__wr  | 0days  | 3days  | 1     | ns  | Rep ANOVA with PH test |
| avg_Angle__right__front__shoulder__ellbow__wr  | 0days  | 7days  | 1     | ns  | Rep ANOVA with PH test |
| avg_Angle__right__front__shoulder__ellbow__wr  | 0days  | 14days | 1     | ns  | Rep ANOVA with PH test |
| avg_Angle__right__front__shoulder__ellbow__wr  | 0days  | 21days | 1     | ns  | Rep ANOVA with PH test |
| max__left__back__hip__ankle__toe               | 0days  | 3days  | 0.276 | ns  | Rep ANOVA with PH test |
| max__left__back__hip__ankle__toe               | 0days  | 7days  | 1     | ns  | Rep ANOVA with PH test |
| max__left__back__hip__ankle__toe               | 0days  | 14days | 1     | ns  | Rep ANOVA with PH test |
| max__left__back__hip__ankle__toe               | 0days  | 21days | 1     | ns  | Rep ANOVA with PH test |
| max__left__back__iliac__hip__ankle             | 0days  | 3days  | 1     | ns  | Rep ANOVA with PH test |
| max__left__back__iliac__hip__ankle             | 0days  | 7days  | 1     | ns  | Rep ANOVA with PH test |
| max__left__back__iliac__hip__ankle             | 0days  | 14days | 1     | ns  | Rep ANOVA with PH test |
| max__left__back__iliac__hip__ankle             | 0days  | 21days | 1     | ns  | Rep ANOVA with PH test |
| max__left__front__ellbow__wrist__toetip        | 0days  | 3days  | 0.418 | ns  | Rep ANOVA with PH test |
| max__left__front__ellbow__wrist__toetip        | 0days  | 7days  | 0.418 | ns  | Rep ANOVA with PH test |
| max__left__front__ellbow__wrist__toetip        | 0days  | 14days | 0.238 | ns  | Rep ANOVA with PH test |
| max__left__front__ellbow__wrist__toetip        | 0days  | 21days | 0.418 | ns  | Rep ANOVA with PH test |
| max__left__front__shoulder__ellbow__wrist      | 0days  | 3days  | 1     | ns  | Rep ANOVA with PH test |
| max__left__front__shoulder__ellbow__wrist      | 0days  | 7days  | 1     | ns  | Rep ANOVA with PH test |

|                                          |       |        |          |                        |
|------------------------------------------|-------|--------|----------|------------------------|
| max__left__front__shoulder_ellbow_wrist  | 0days | 14days | 1 ns     | Rep ANOVA with PH test |
| max__left__front__shoulder_ellbow_wrist  | 0days | 21days | 1 ns     | Rep ANOVA with PH test |
| max__right__back__hip_ankle_toe          | 0days | 3days  | 0.102 ns | Rep ANOVA with PH test |
| max__right__back__hip_ankle_toe          | 0days | 7days  | 1 ns     | Rep ANOVA with PH test |
| max__right__back__hip_ankle_toe          | 0days | 14days | 1 ns     | Rep ANOVA with PH test |
| max__right__back__hip_ankle_toe          | 0days | 21days | 1 ns     | Rep ANOVA with PH test |
| max__right__back__iliac_hip_ankle        | 0days | 3days  | 1 ns     | Rep ANOVA with PH test |
| max__right__back__iliac_hip_ankle        | 0days | 7days  | 1 ns     | Rep ANOVA with PH test |
| max__right__back__iliac_hip_ankle        | 0days | 14days | 1 ns     | Rep ANOVA with PH test |
| max__right__back__iliac_hip_ankle        | 0days | 21days | 1 ns     | Rep ANOVA with PH test |
| max__right__front__ellbow_wrist_toetip   | 0days | 3days  | 0.68 ns  | Rep ANOVA with PH test |
| max__right__front__ellbow_wrist_toetip   | 0days | 7days  | 0.896 ns | Rep ANOVA with PH test |
| max__right__front__ellbow_wrist_toetip   | 0days | 14days | 0.929 ns | Rep ANOVA with PH test |
| max__right__front__ellbow_wrist_toetip   | 0days | 21days | 0.929 ns | Rep ANOVA with PH test |
| max__right__front__shoulder_ellbow_wrist | 0days | 3days  | 1 ns     | Rep ANOVA with PH test |
| max__right__front__shoulder_ellbow_wrist | 0days | 7days  | 1 ns     | Rep ANOVA with PH test |
| max__right__front__shoulder_ellbow_wrist | 0days | 14days | 1 ns     | Rep ANOVA with PH test |
| max__right__front__shoulder_ellbow_wrist | 0days | 21days | 1 ns     | Rep ANOVA with PH test |
| min__left__back__hip_ankle_toe           | 0days | 3days  | 1 ns     | Rep ANOVA with PH test |
| min__left__back__hip_ankle_toe           | 0days | 7days  | 1 ns     | Rep ANOVA with PH test |
| min__left__back__hip_ankle_toe           | 0days | 14days | 1 ns     | Rep ANOVA with PH test |
| min__left__back__hip_ankle_toe           | 0days | 21days | 1 ns     | Rep ANOVA with PH test |
| min__left__back__iliac_hip_ankle         | 0days | 3days  | 1 ns     | Rep ANOVA with PH test |
| min__left__back__iliac_hip_ankle         | 0days | 7days  | 1 ns     | Rep ANOVA with PH test |
| min__left__back__iliac_hip_ankle         | 0days | 14days | 1 ns     | Rep ANOVA with PH test |
| min__left__back__iliac_hip_ankle         | 0days | 21days | 1 ns     | Rep ANOVA with PH test |
| min__left__front__ellbow_wrist_toetip    | 0days | 3days  | 0.769 ns | Rep ANOVA with PH test |
| min__left__front__ellbow_wrist_toetip    | 0days | 7days  | 0.769 ns | Rep ANOVA with PH test |
| min__left__front__ellbow_wrist_toetip    | 0days | 14days | 0.176 ns | Rep ANOVA with PH test |
| min__left__front__ellbow_wrist_toetip    | 0days | 21days | 0.769 ns | Rep ANOVA with PH test |
| min__left__front__shoulder_ellbow_wrist  | 0days | 3days  | 1 ns     | Rep ANOVA with PH test |
| min__left__front__shoulder_ellbow_wrist  | 0days | 7days  | 1 ns     | Rep ANOVA with PH test |
| min__left__front__shoulder_ellbow_wrist  | 0days | 14days | 1 ns     | Rep ANOVA with PH test |
| min__left__front__shoulder_ellbow_wrist  | 0days | 21days | 1 ns     | Rep ANOVA with PH test |
| min__right__back__hip_ankle_toe          | 0days | 3days  | 1 ns     | Rep ANOVA with PH test |
| min__right__back__hip_ankle_toe          | 0days | 7days  | 1 ns     | Rep ANOVA with PH test |
| min__right__back__hip_ankle_toe          | 0days | 14days | 0.241 ns | Rep ANOVA with PH test |
| min__right__back__hip_ankle_toe          | 0days | 21days | 1 ns     | Rep ANOVA with PH test |
| min__right__back__iliac_hip_ankle        | 0days | 3days  | 0.912 ns | Rep ANOVA with PH test |
| min__right__back__iliac_hip_ankle        | 0days | 7days  | 1 ns     | Rep ANOVA with PH test |
| min__right__back__iliac_hip_ankle        | 0days | 14days | 1 ns     | Rep ANOVA with PH test |
| min__right__back__iliac_hip_ankle        | 0days | 21days | 1 ns     | Rep ANOVA with PH test |
| min__right__front__ellbow_wrist_toetip   | 0days | 3days  | 1 ns     | Rep ANOVA with PH test |
| min__right__front__ellbow_wrist_toetip   | 0days | 7days  | 1 ns     | Rep ANOVA with PH test |
| min__right__front__ellbow_wrist_toetip   | 0days | 14days | 1 ns     | Rep ANOVA with PH test |
| min__right__front__ellbow_wrist_toetip   | 0days | 21days | 1 ns     | Rep ANOVA with PH test |
| min__right__front__shoulder_ellbow_wrist | 0days | 3days  | 1 ns     | Rep ANOVA with PH test |
| min__right__front__shoulder_ellbow_wrist | 0days | 7days  | 1 ns     | Rep ANOVA with PH test |

|                                          |       |        |      |                        |
|------------------------------------------|-------|--------|------|------------------------|
| min__right__front__shoulder_ellbow_wrist | 0days | 14days | 1 ns | Rep ANOVA with PH test |
| min__right__front__shoulder_ellbow_wrist | 0days | 21days | 1 ns | Rep ANOVA with PH test |

---



**Suppl. Table 28: Parameter importance based on random forest classification baseline, 3, 7, 14, 21 dpi**

| Ranking | Importance (Gini) | Name Parameter                 | Groups                  |
|---------|-------------------|--------------------------------|-------------------------|
| 1       | 1.404140601       | l-back-toe__Average_Height     | baseline, 3,7,14,21 dpi |
| 2       | 1.098874678       | left__back__protraction        | baseline, 3,7,14,21 dpi |
| 3       | 1.007898844       | l-front-toe-tip__Movement      | baseline, 3,7,14,21 dpi |
| 4       | 0.958852155       | right__back__median            | baseline, 3,7,14,21 dpi |
| 5       | 0.94089747        | right__back__movement_per_step | baseline, 3,7,14,21 dpi |
| 6       | 0.925255406       | left__front__protraction       | baseline, 3,7,14,21 dpi |
| 7       | 0.922614498       | left__back__average            | baseline, 3,7,14,21 dpi |
| 8       | 0.888160511       | l-wrist__Average_Height        | baseline, 3,7,14,21 dpi |
| 9       | 0.860963463       | l-back-ankle__Movement         | baseline, 3,7,14,21 dpi |
| 10      | 0.844080488       | right__back__protraction       | baseline, 3,7,14,21 dpi |
| 11      | 0.73386252        | l-wrist__Movement              | baseline, 3,7,14,21 dpi |
| 12      | 0.725433395       | right__front__protraction      | baseline, 3,7,14,21 dpi |
| 13      | 0.718656082       | FRBL_RATIO                     | baseline, 3,7,14,21 dpi |
| 14      | 0.682319128       | l-back-toe__Movement           | baseline, 3,7,14,21 dpi |
| 15      | 0.639498284       | right__back__average           | baseline, 3,7,14,21 dpi |
| 16      | 0.622255378       | left__front__retraction        | baseline, 3,7,14,21 dpi |
| 17      | 0.610304695       | r-wrist__Movement              | baseline, 3,7,14,21 dpi |
| 18      | 0.604568189       | left__back__retraction         | baseline, 3,7,14,21 dpi |
| 19      | 0.60391649        | right__back__seconds           | baseline, 3,7,14,21 dpi |
| 20      | 0.573511732       | r-wrist__Average_Height        | baseline, 3,7,14,21 dpi |

**Suppl. Table 29: Parameter importance based on random forest classification baseline and 3 dpi**

| Ranking | Importance (Gini) | Name Parameter                  | Groups          |
|---------|-------------------|---------------------------------|-----------------|
| 1       | 0.343571429       | l-hip__Average_Height           | baseline, 3 dpi |
| 2       | 0.236904762       | r-front-toe-tip__Average_Height | baseline, 3 dpi |
| 3       | 0.221428571       | l-hip__Movement                 | baseline, 3 dpi |
| 4       | 0.215714286       | right__back__median             | baseline, 3 dpi |
| 5       | 0.210952381       | right__back__seconds            | baseline, 3 dpi |
| 6       | 0.187142857       | r-wrist__Average_Height         | baseline, 3 dpi |
| 7       | 0.157142857       | r-hip__Average_Height           | baseline, 3 dpi |
| 8       | 0.15              | r-hip__Movement                 | baseline, 3 dpi |
| 9       | 0.145714286       | right__back__average            | baseline, 3 dpi |
| 10      | 0.139285714       | FRBL_RATIO                      | baseline, 3 dpi |
| 11      | 0.105714286       | l-front-toe-tip__Movement       | baseline, 3 dpi |
| 12      | 0.102857143       | left__front__seconds            | baseline, 3 dpi |
| 13      | 0.10047619        | left__back__average             | baseline, 3 dpi |
| 14      | 0.100238095       | l-back-toe__Average_Height      | baseline, 3 dpi |
| 15      | 0.098571429       | r-wrist__Movement               | baseline, 3 dpi |
| 16      | 0.098571429       | right__front__average           | baseline, 3 dpi |
| 17      | 0.097142857       | l-front-toe-tip__Average_Height | baseline, 3 dpi |
| 18      | 0.096785714       | left__back__seconds             | baseline, 3 dpi |
| 19      | 0.078095238       | l-back-toe__Movement            | baseline, 3 dpi |
| 20      | 0.066666667       | l-wrist__Movement               | baseline, 3 dpi |

**Suppl. Table 30: Parameter importance based on random forest classification baseline and 21 dpi**

| <b>Ranking</b> | <b>Importance (Gini)</b> | <b>Name Parameter</b>         | <b>Groups</b>    |
|----------------|--------------------------|-------------------------------|------------------|
| 1              | 0.698500309              | left__front__retraction       | baseline, 21 dpi |
| 2              | 0.328743558              | left__front__median           | baseline, 21 dpi |
| 3              | 0.242116574              | right__front__seconds         | baseline, 21 dpi |
| 4              | 0.217580396              | l-tail-base__Average_Height   | baseline, 21 dpi |
| 5              | 0.171238404              | l-tail-base__Movement         | baseline, 21 dpi |
| 6              | 0.166821274              | right__front__retraction      | baseline, 21 dpi |
| 7              | 0.166770254              | right__front__average         | baseline, 21 dpi |
| 8              | 0.147867965              | r-back-ankle__Movement        | baseline, 21 dpi |
| 9              | 0.14038961               | left__front__average          | baseline, 21 dpi |
| 10             | 0.138056586              | left__front__protraction      | baseline, 21 dpi |
| 11             | 0.136403319              | l-front-toe-tip__Movement     | baseline, 21 dpi |
| 12             | 0.122979283              | right__back__seconds          | baseline, 21 dpi |
| 13             | 0.122492785              | left__front__seconds          | baseline, 21 dpi |
| 14             | 0.118863636              | r-iliac-crest__Average_Height | baseline, 21 dpi |
| 15             | 0.1180906                | left__front__retraction       | baseline, 21 dpi |
| 16             | 0.109763451              | l-hip__Average_Height         | baseline, 21 dpi |
| 17             | 0.10025974               | left__back__seconds           | baseline, 21 dpi |
| 18             | 0.098092146              | left__back__median            | baseline, 21 dpi |
| 19             | 0.093073593              | avg_stance_time               | baseline, 21 dpi |
| 20             | 0.088682746              | avg_swing_time                | baseline, 21 dpi |

**Suppl. Table 31: Error rate between intact and injured mice during ladder rung test**

| Measure         | Day    | median     | mean       | sd          |
|-----------------|--------|------------|------------|-------------|
| l-back-toe      | intact | 0          | 5.07111936 | 7.338168353 |
| l-back-toe      | stoked | 12.5       | 14.3187065 | 13.7133233  |
| l-front-toe-tip | intact | 0          | 8.54711306 | 11.48099774 |
| l-front-toe-tip | stoked | 14.2857143 | 15.5634395 | 13.1484941  |
| r-back-toe      | intact | 0          | 1.66624501 | 4.431341378 |
| r-back-toe      | stoked | 0          | 6.90764791 | 10.88975155 |
| r-front-toe-tip | intact | 0          | 5.77959198 | 7.420014048 |
| r-front-toe-tip | stoked | 0          | 6.99085418 | 9.900592938 |

**Suppl. Table 32: Statistics for error rate between intact and injured mice during ladder rung test**

| Measure         | group1 | group2 | p.adj      | sig  | Test*     |
|-----------------|--------|--------|------------|------|-----------|
| l-back-toe      | intact | stoked | 3.31E-05   | **** | Dunn Test |
| l-front-toe-tip | intact | stoked | 0.00092729 | ***  | Dunn Test |
| r-back-toe      | intact | stoked | 0.00097815 | ***  | Dunn Test |
| r-front-toe-tip | intact | stoked | 0.77167211 | ns   | Dunn Test |

**Suppl. Table 33: Error rate in a time course during ladder rung test**

| Measure         | Day    | median     | mean       | sd          |
|-----------------|--------|------------|------------|-------------|
| l-front-toe-tip | 0days  | 0          | 9.07653292 | 11.59493899 |
| l-front-toe-tip | 3days  | 14.2857143 | 14.8750304 | 12.4414783  |
| l-front-toe-tip | 7days  | 16.6666667 | 19.0929903 | 14.82716005 |
| l-front-toe-tip | 14days | 12.5       | 16.6249612 | 17.05103827 |
| l-front-toe-tip | 21days | 12.5       | 14.4451062 | 15.43371401 |
| l-back-toe      | 0days  | 0          | 5.22108844 | 7.162169313 |
| l-back-toe      | 3days  | 12.5       | 14.6640165 | 13.73748383 |
| l-back-toe      | 7days  | 10         | 12.2643206 | 15.0284742  |
| l-back-toe      | 14days | 9.09090909 | 10.4341769 | 11.42036526 |
| l-back-toe      | 21days | 0          | 6.88517964 | 10.68409771 |
| r-back-toe      | 0days  | 0          | 1.75754611 | 4.534867628 |
| r-back-toe      | 3days  | 0          | 6.95922814 | 10.89317723 |
| r-back-toe      | 7days  | 0          | 3.69699123 | 8.373892334 |
| r-back-toe      | 14days | 0          | 4.01435574 | 7.569811652 |
| r-back-toe      | 21days | 0          | 4.31710495 | 8.36361438  |
| r-front-toe-tip | 0days  | 0          | 4.77024959 | 6.140608234 |
| r-front-toe-tip | 3days  | 0          | 7.29295811 | 10.08561303 |
| r-front-toe-tip | 7days  | 0          | 3.77267426 | 7.092408012 |
| r-front-toe-tip | 14days | 0          | 8.01656476 | 10.54868099 |
| r-front-toe-tip | 21days | 0          | 5.61199553 | 11.92702074 |

**Suppl. Table 34: Statistics throughout a time course during ladder rung test**

| parameter       | group1 | group2 | p.adj      | p.adj.signif | Test*                             |
|-----------------|--------|--------|------------|--------------|-----------------------------------|
| l-back-toe      | 0days  | 3days  | 1.73E-05   | ****         | Repeated ANOVA with post hoc test |
| l-back-toe      | 0days  | 7days  | 0.00067035 | ***          | Repeated ANOVA with post hoc test |
| l-back-toe      | 0days  | 14days | 0.01370947 | *            | Repeated ANOVA with post hoc test |
| l-back-toe      | 0days  | 21days | 0.39747262 | ns           | Repeated ANOVA with post hoc test |
| l-front-toe-tip | 0days  | 3days  | 0.01174657 | *            | Repeated ANOVA with post hoc test |
| l-front-toe-tip | 0days  | 7days  | 8.95E-07   | ****         | Repeated ANOVA with post hoc test |
| l-front-toe-tip | 0days  | 14days | 0.00025968 | ***          | Repeated ANOVA with post hoc test |
| l-front-toe-tip | 0days  | 21days | 0.01174657 | *            | Repeated ANOVA with post hoc test |
| r-back-toe      | 0days  | 3days  | 0.04348641 | *            | Repeated ANOVA with post hoc test |
| r-back-toe      | 0days  | 7days  | 0.52810778 | ns           | Repeated ANOVA with post hoc test |
| r-back-toe      | 0days  | 14days | 0.52810778 | ns           | Repeated ANOVA with post hoc test |
| r-back-toe      | 0days  | 21days | 0.52810778 | ns           | Repeated ANOVA with post hoc test |
| r-front-toe-tip | 0days  | 3days  | 0.65330132 | ns           | Repeated ANOVA with post hoc test |
| r-front-toe-tip | 0days  | 7days  | 1          | ns           | Repeated ANOVA with post hoc test |
| r-front-toe-tip | 0days  | 14days | 0.34823814 | ns           | Repeated ANOVA with post hoc test |
| r-front-toe-tip | 0days  | 21days | 1          | ns           | Repeated ANOVA with post hoc test |

**Suppl. Table 35: Raw data during conventional tests**

| Behavior test | Score      | Parameter | Mouse_ID | Day      |
|---------------|------------|-----------|----------|----------|
| ladder rung   | 0.013924   | FL        | 1        | baseline |
| ladder rung   | 0.034935   | FL        | 2        | baseline |
| ladder rung   | 0.054539   | FL        | 3        | baseline |
| ladder rung   | 0.03522    | FL        | 4        | baseline |
| ladder rung   | 0.04778985 | FL        | 5        | baseline |
| ladder rung   | 0.04300255 | FL        | 6        | baseline |
| ladder rung   | 0.04352911 | FL        | 7        | baseline |
| ladder rung   | 0.04876631 | FL        | 8        | baseline |
| ladder rung   | 0.04440803 | FL        | 9        | baseline |
| ladder rung   | 0.06496047 | FL        | 10       | baseline |
| ladder rung   | 0.06659583 | FL        | 11       | baseline |
| ladder rung   | 0.04204352 | FL        | 12       | baseline |
| ladder rung   | 0.184202   | FL        | 1        | 3        |
| ladder rung   | 0.249242   | FL        | 2        | 3        |
| ladder rung   | 0.21934    | FL        | 3        | 3        |
| ladder rung   | 0.2294     | FL        | 4        | 3        |
| ladder rung   | 0.2885575  | FL        | 5        | 3        |
| ladder rung   | 0.2779464  | FL        | 6        | 3        |
| ladder rung   | 0.2447014  | FL        | 7        | 3        |
| ladder rung   | 0.2359469  | FL        | 8        | 3        |
| ladder rung   | 0.2811619  | FL        | 9        | 3        |
| ladder rung   | 0.1750913  | FL        | 10       | 3        |
| ladder rung   | 0.2881345  | FL        | 11       | 3        |
| ladder rung   | 0.2974798  | FL        | 12       | 3        |
| ladder rung   | 0.1924652  | FL        | 1        | 7        |
| ladder rung   | 0.1758639  | FL        | 2        | 7        |
| ladder rung   | 0.234539   | FL        | 3        | 7        |
| ladder rung   | 0.2678063  | FL        | 4        | 7        |
| ladder rung   | 0.1683676  | FL        | 5        | 7        |
| ladder rung   | 0.1737422  | FL        | 6        | 7        |
| ladder rung   | 0.2573249  | FL        | 7        | 7        |
| ladder rung   | 0.2104021  | FL        | 8        | 7        |
| ladder rung   | 0.2819787  | FL        | 9        | 7        |
| ladder rung   | 0.2490475  | FL        | 10       | 7        |
| ladder rung   | 0.2944221  | FL        | 11       | 7        |
| ladder rung   | 0.1558081  | FL        | 12       | 7        |
| ladder rung   | 0.2152912  | FL        | 1        | 14       |
| ladder rung   | 0.2604266  | FL        | 2        | 14       |
| ladder rung   | 0.1762194  | FL        | 3        | 14       |
| ladder rung   | 0.2038705  | FL        | 4        | 14       |
| ladder rung   | 0.2518033  | FL        | 5        | 14       |
| ladder rung   | 0.1612487  | FL        | 6        | 14       |
| ladder rung   | 0.2015572  | FL        | 7        | 14       |
| ladder rung   | 0.2098318  | FL        | 8        | 14       |
| ladder rung   | 0.1715338  | FL        | 9        | 14       |
| ladder rung   | 0.1924448  | FL        | 10       | 14       |
| ladder rung   | 0.1960025  | FL        | 11       | 14       |
| ladder rung   | 0.1385358  | FL        | 12       | 14       |
| ladder rung   | 0.11456    | FL        | 1        | 21       |
| ladder rung   | 0.14304    | FL        | 2        | 21       |

|             |            |             |    |          |
|-------------|------------|-------------|----|----------|
| ladder rung | 0.12314    | FL          | 3  | 21       |
| ladder rung | 0.110394   | FL          | 4  | 21       |
| ladder rung | 0.1703651  | FL          | 5  | 21       |
| ladder rung | 0.2166202  | FL          | 6  | 21       |
| ladder rung | 0.1061859  | FL          | 7  | 21       |
| ladder rung | 0.1828388  | FL          | 8  | 21       |
| ladder rung | 0.1609431  | FL          | 9  | 21       |
| ladder rung | 0.2353897  | FL          | 10 | 21       |
| ladder rung | 0.1891668  | FL          | 11 | 21       |
| ladder rung | 0.2170997  | FL          | 12 | 21       |
| ladder rung | 0.0437     | ladder rung | 1  | baseline |
| ladder rung | 0.066394   | ladder rung | 2  | baseline |
| ladder rung | 0.02452    | ladder rung | 3  | baseline |
| ladder rung | 0.0195602  | ladder rung | 4  | baseline |
| ladder rung | 0.03563    | ladder rung | 5  | baseline |
| ladder rung | 0.02546    | ladder rung | 6  | baseline |
| ladder rung | 0.013825   | ladder rung | 7  | baseline |
| ladder rung | 0.03994745 | ladder rung | 8  | baseline |
| ladder rung | 0.01769902 | ladder rung | 9  | baseline |
| ladder rung | 0.0375225  | ladder rung | 10 | baseline |
| ladder rung | 0.02544737 | ladder rung | 11 | baseline |
| ladder rung | 0.05332957 | ladder rung | 12 | baseline |
| ladder rung | 0.209953   | ladder rung | 1  | 3        |
| ladder rung | 0.1724     | ladder rung | 2  | 3        |
| ladder rung | 0.15355    | ladder rung | 3  | 3        |
| ladder rung | 0.13385    | ladder rung | 4  | 3        |
| ladder rung | 0.25836    | ladder rung | 5  | 3        |
| ladder rung | 0.1836     | ladder rung | 6  | 3        |
| ladder rung | 0.16754    | ladder rung | 7  | 3        |
| ladder rung | 0.1636239  | ladder rung | 8  | 3        |
| ladder rung | 0.2400068  | ladder rung | 9  | 3        |
| ladder rung | 0.1358733  | ladder rung | 10 | 3        |
| ladder rung | 0.157042   | ladder rung | 11 | 3        |
| ladder rung | 0.09770476 | ladder rung | 12 | 3        |
| ladder rung | 0.18425    | ladder rung | 1  | 7        |
| ladder rung | 0.14425    | ladder rung | 2  | 7        |
| ladder rung | 0.1856     | ladder rung | 3  | 7        |
| ladder rung | 0.17285    | ladder rung | 4  | 7        |
| ladder rung | 0.24258    | ladder rung | 5  | 7        |
| ladder rung | 0.143536   | ladder rung | 6  | 7        |
| ladder rung | 0.15342    | ladder rung | 7  | 7        |
| ladder rung | 0.2172824  | ladder rung | 8  | 7        |
| ladder rung | 0.1547405  | ladder rung | 9  | 7        |
| ladder rung | 0.199411   | ladder rung | 10 | 7        |
| ladder rung | 0.1812098  | ladder rung | 11 | 7        |
| ladder rung | 0.2150024  | ladder rung | 12 | 7        |
| ladder rung | 0.10353    | ladder rung | 1  | 14       |
| ladder rung | 0.11429    | ladder rung | 2  | 14       |
| ladder rung | 0.1434835  | ladder rung | 3  | 14       |
| ladder rung | 0.114935   | ladder rung | 4  | 14       |
| ladder rung | 0.1842     | ladder rung | 5  | 14       |
| ladder rung | 0.094852   | ladder rung | 6  | 14       |

|                |            |                |    |          |
|----------------|------------|----------------|----|----------|
| ladder rung    | 0.14356    | ladder rung    | 7  | 14       |
| ladder rung    | 0.201433   | ladder rung    | 8  | 14       |
| ladder rung    | 0.1061027  | ladder rung    | 9  | 14       |
| ladder rung    | 0.1566955  | ladder rung    | 10 | 14       |
| ladder rung    | 0.1511585  | ladder rung    | 11 | 14       |
| ladder rung    | 0.1738028  | ladder rung    | 12 | 14       |
| ladder rung    | 0.0535     | ladder rung    | 1  | 21       |
| ladder rung    | 0.0245     | ladder rung    | 2  | 21       |
| ladder rung    | 0.13285    | ladder rung    | 3  | 21       |
| ladder rung    | 0.18646    | ladder rung    | 4  | 21       |
| ladder rung    | 0.09435    | ladder rung    | 5  | 21       |
| ladder rung    | 0.0843536  | ladder rung    | 6  | 21       |
| ladder rung    | 0.0483535  | ladder rung    | 7  | 21       |
| ladder rung    | 0.04401902 | ladder rung    | 8  | 21       |
| ladder rung    | 0.1562648  | ladder rung    | 9  | 21       |
| ladder rung    | 0.15005045 | ladder rung    | 10 | 21       |
| ladder rung    | 0.05684677 | ladder rung    | 11 | 21       |
| ladder rung    | 0.09030958 | ladder rung    | 12 | 21       |
| Neurolog Score | 0          | Neurolog Score | 1  | baseline |
| Neurolog Score | 0          | Neurolog Score | 2  | baseline |
| Neurolog Score | 0.5        | Neurolog Score | 3  | baseline |
| Neurolog Score | 0          | Neurolog Score | 4  | baseline |
| Neurolog Score | 0          | Neurolog Score | 5  | baseline |
| Neurolog Score | 0          | Neurolog Score | 6  | baseline |
| Neurolog Score | 0          | Neurolog Score | 7  | baseline |
| Neurolog Score | 3.5        | Neurolog Score | 1  | 0        |
| Neurolog Score | 4          | Neurolog Score | 2  | 0        |
| Neurolog Score | 3.5        | Neurolog Score | 3  | 0        |
| Neurolog Score | 4.5        | Neurolog Score | 4  | 0        |
| Neurolog Score | 4          | Neurolog Score | 5  | 0        |
| Neurolog Score | 4          | Neurolog Score | 6  | 0        |
| Neurolog Score | 4          | Neurolog Score | 7  | 0        |
| Neurolog Score | 1.5        | Neurolog Score | 1  | 3        |
| Neurolog Score | 2          | Neurolog Score | 2  | 3        |
| Neurolog Score | 1.5        | Neurolog Score | 3  | 3        |
| Neurolog Score | 2          | Neurolog Score | 4  | 3        |
| Neurolog Score | 1.5        | Neurolog Score | 5  | 3        |
| Neurolog Score | 2          | Neurolog Score | 6  | 3        |
| Neurolog Score | 1.5        | Neurolog Score | 7  | 3        |
| Neurolog Score | 1.5        | Neurolog Score | 1  | 7        |
| Neurolog Score | 0          | Neurolog Score | 2  | 7        |
| Neurolog Score | 0.5        | Neurolog Score | 3  | 7        |
| Neurolog Score | 0          | Neurolog Score | 4  | 7        |
| Neurolog Score | 1          | Neurolog Score | 5  | 7        |
| Neurolog Score | 1          | Neurolog Score | 6  | 7        |
| Neurolog Score | 1          | Neurolog Score | 7  | 7        |
| Neurolog Score | 0          | Neurolog Score | 1  | 14       |
| Neurolog Score | 0          | Neurolog Score | 2  | 14       |
| Neurolog Score | 0.5        | Neurolog Score | 3  | 14       |
| Neurolog Score | 0.5        | Neurolog Score | 4  | 14       |
| Neurolog Score | 0.5        | Neurolog Score | 5  | 14       |
| Neurolog Score | 0.5        | Neurolog Score | 6  | 14       |

|                |           |                |    |          |
|----------------|-----------|----------------|----|----------|
| Neurolog Score | 0.5       | Neurolog Score | 7  | 14       |
| Neurolog Score | 0         | Neurolog Score | 1  | 21       |
| Neurolog Score | 0         | Neurolog Score | 2  | 21       |
| Neurolog Score | 0         | Neurolog Score | 3  | 21       |
| Neurolog Score | 0.5       | Neurolog Score | 4  | 21       |
| Neurolog Score | 0.5       | Neurolog Score | 5  | 21       |
| Neurolog Score | 0         | Neurolog Score | 6  | 21       |
| Neurolog Score | 0.5       | Neurolog Score | 7  | 21       |
| Cylinder       | 0.125     | Dragging       | 1  | baseline |
| Cylinder       | 0.090909  | Dragging       | 2  | baseline |
| Cylinder       | 0         | Dragging       | 3  | baseline |
| Cylinder       | 0         | Dragging       | 4  | baseline |
| Cylinder       | 0         | Dragging       | 5  | baseline |
| Cylinder       | 0.0625    | Dragging       | 6  | baseline |
| Cylinder       | 0         | Dragging       | 7  | baseline |
| Cylinder       | 0         | Dragging       | 8  | baseline |
| Cylinder       | 0         | Dragging       | 9  | baseline |
| Cylinder       | 0.03125   | Dragging       | 10 | baseline |
| Cylinder       | 0         | Dragging       | 11 | baseline |
| Cylinder       | 0         | Dragging       | 12 | baseline |
| Cylinder       | 0.333333  | Dragging       | 1  | 3        |
| Cylinder       | 0.342857  | Dragging       | 2  | 3        |
| Cylinder       | 0.215385  | Dragging       | 3  | 3        |
| Cylinder       | 0.310526  | Dragging       | 4  | 3        |
| Cylinder       | 0.45      | Dragging       | 5  | 3        |
| Cylinder       | 0.46      | Dragging       | 6  | 3        |
| Cylinder       | 0.357143  | Dragging       | 7  | 3        |
| Cylinder       | 0.333333  | Dragging       | 8  | 3        |
| Cylinder       | 0.2142857 | Dragging       | 9  | 3        |
| Cylinder       | 0.125     | Dragging       | 10 | 3        |
| Cylinder       | 0.5       | Dragging       | 11 | 3        |
| Cylinder       | 0.2173913 | Dragging       | 12 | 3        |
| Cylinder       | 0.28      | Dragging       | 1  | 7        |
| Cylinder       | 0.367     | Dragging       | 2  | 7        |
| Cylinder       | 0.254     | Dragging       | 3  | 7        |
| Cylinder       | 0.2842    | Dragging       | 4  | 7        |
| Cylinder       | 0.28      | Dragging       | 5  | 7        |
| Cylinder       | 0.33      | Dragging       | 6  | 7        |
| Cylinder       | 0.615385  | Dragging       | 7  | 7        |
| Cylinder       | 0.35      | Dragging       | 8  | 7        |
| Cylinder       | 0.353     | Dragging       | 9  | 7        |
| Cylinder       | 0.2453    | Dragging       | 10 | 7        |
| Cylinder       | 0.368     | Dragging       | 11 | 7        |
| Cylinder       | 0.3524    | Dragging       | 12 | 7        |
| Cylinder       | 0.2       | Dragging       | 1  | 14       |
| Cylinder       | 0.29      | Dragging       | 2  | 14       |
| Cylinder       | 0.22      | Dragging       | 3  | 14       |
| Cylinder       | 0.2       | Dragging       | 4  | 14       |
| Cylinder       | 0.2       | Dragging       | 5  | 14       |
| Cylinder       | 0.57      | Dragging       | 6  | 14       |
| Cylinder       | 0.4       | Dragging       | 7  | 14       |
| Cylinder       | 0.36      | Dragging       | 8  | 14       |



|          |           |           |    |          |
|----------|-----------|-----------|----|----------|
| Cylinder | 0.15      | Dragging  | 9  | 14       |
| Cylinder | 0.356     | Dragging  | 10 | 14       |
| Cylinder | 0.294     | Dragging  | 11 | 14       |
| Cylinder | 0.2256    | Dragging  | 12 | 14       |
| Cylinder | 0.15      | Dragging  | 1  | 21       |
| Cylinder | 0.166     | Dragging  | 2  | 21       |
| Cylinder | 0.25      | Dragging  | 3  | 21       |
| Cylinder | 0.25      | Dragging  | 4  | 21       |
| Cylinder | 0.4       | Dragging  | 5  | 21       |
| Cylinder | 0.3       | Dragging  | 6  | 21       |
| Cylinder | 0.291667  | Dragging  | 7  | 21       |
| Cylinder | 0.381818  | Dragging  | 8  | 21       |
| Cylinder | 0.3333333 | Dragging  | 9  | 21       |
| Cylinder | 0.25      | Dragging  | 10 | 21       |
| Cylinder | 0.5       | Dragging  | 11 | 21       |
| Cylinder | 0.4       | Dragging  | 12 | 21       |
| Cylinder | 0.5       | Asymmetry | 1  | baseline |
| Cylinder | 0.3       | Asymmetry | 2  | baseline |
| Cylinder | 0.4       | Asymmetry | 3  | baseline |
| Cylinder | 0.7       | Asymmetry | 4  | baseline |
| Cylinder | 0.25      | Asymmetry | 5  | baseline |
| Cylinder | 0         | Asymmetry | 6  | baseline |
| Cylinder | 0.146     | Asymmetry | 7  | baseline |
| Cylinder | 0.14      | Asymmetry | 8  | baseline |
| Cylinder | 0.27      | Asymmetry | 9  | baseline |
| Cylinder | 0.43      | Asymmetry | 10 | baseline |
| Cylinder | 0         | Asymmetry | 11 | baseline |
| Cylinder | 0.090909  | Asymmetry | 12 | baseline |
| Cylinder | 0.5       | Asymmetry | 1  | 3        |
| Cylinder | 0.85      | Asymmetry | 2  | 3        |
| Cylinder | 0.9       | Asymmetry | 3  | 3        |
| Cylinder | 0.6       | Asymmetry | 4  | 3        |
| Cylinder | 0.4744    | Asymmetry | 5  | 3        |
| Cylinder | 0.64674   | Asymmetry | 6  | 3        |
| Cylinder | 0.67      | Asymmetry | 7  | 3        |
| Cylinder | 0.79      | Asymmetry | 8  | 3        |
| Cylinder | 0.77      | Asymmetry | 9  | 3        |
| Cylinder | 0.85      | Asymmetry | 10 | 3        |
| Cylinder | 0.667     | Asymmetry | 11 | 3        |
| Cylinder | 0.37      | Asymmetry | 12 | 3        |
| Cylinder | 0.736     | Asymmetry | 1  | 7        |
| Cylinder | 0.665     | Asymmetry | 2  | 7        |
| Cylinder | 0.6755    | Asymmetry | 3  | 7        |
| Cylinder | 0.7055    | Asymmetry | 4  | 7        |
| Cylinder | 0.68      | Asymmetry | 5  | 7        |
| Cylinder | 0.57      | Asymmetry | 6  | 7        |
| Cylinder | 0.68      | Asymmetry | 7  | 7        |
| Cylinder | 0.7       | Asymmetry | 8  | 7        |
| Cylinder | 0.574     | Asymmetry | 9  | 7        |
| Cylinder | 0.79      | Asymmetry | 10 | 7        |
| Cylinder | 0.4       | Asymmetry | 11 | 7        |
| Cylinder | 0.4577    | Asymmetry | 12 | 7        |

|          |            |             |    |          |
|----------|------------|-------------|----|----------|
| Cylinder | 0.75       | Asymmetry   | 1  | 14       |
| Cylinder | 0.67       | Asymmetry   | 2  | 14       |
| Cylinder | 0.766      | Asymmetry   | 3  | 14       |
| Cylinder | 0.799      | Asymmetry   | 4  | 14       |
| Cylinder | 0.55       | Asymmetry   | 5  | 14       |
| Cylinder | 0.56       | Asymmetry   | 6  | 14       |
| Cylinder | 0.77       | Asymmetry   | 7  | 14       |
| Cylinder | 0.55       | Asymmetry   | 8  | 14       |
| Cylinder | 0.842      | Asymmetry   | 9  | 14       |
| Cylinder | 0.95       | Asymmetry   | 10 | 14       |
| Cylinder | 0.5        | Asymmetry   | 11 | 14       |
| Cylinder | 0.855      | Asymmetry   | 12 | 14       |
| Cylinder | 0.9        | Asymmetry   | 1  | 21       |
| Cylinder | 0.75       | Asymmetry   | 2  | 21       |
| Cylinder | 0.9        | Asymmetry   | 3  | 21       |
| Cylinder | 0.82307692 | Asymmetry   | 4  | 21       |
| Cylinder | 0.58       | Asymmetry   | 5  | 21       |
| Cylinder | 0.5        | Asymmetry   | 6  | 21       |
| Cylinder | 0.56       | Asymmetry   | 7  | 21       |
| Cylinder | 0.7        | Asymmetry   | 8  | 21       |
| Cylinder | 0.8        | Asymmetry   | 9  | 21       |
| Cylinder | 0.9        | Asymmetry   | 10 | 21       |
| Cylinder | 0.35       | Asymmetry   | 11 | 21       |
| Cylinder | 0.76       | Asymmetry   | 12 | 21       |
| Rotarod  | 0.00689655 | Rotarod_Lat | 1  | baseline |
| Rotarod  | 0.00655022 | Rotarod_Lat | 2  | baseline |
| Rotarod  | 0.00562852 | Rotarod_Lat | 3  | baseline |
| Rotarod  | 0.00993377 | Rotarod_Lat | 4  | baseline |
| Rotarod  | 0.01132075 | Rotarod_Lat | 5  | baseline |
| Rotarod  | 0.00689655 | Rotarod_Lat | 6  | baseline |
| Rotarod  | 0.00806452 | Rotarod_Lat | 7  | baseline |
| Rotarod  | 0.015625   | Rotarod_Lat | 8  | baseline |
| Rotarod  | 0.01345291 | Rotarod_Lat | 9  | baseline |
| Rotarod  | 0.00849858 | Rotarod_Lat | 10 | baseline |
| Rotarod  | 0.01003344 | Rotarod_Lat | 11 | baseline |
| Rotarod  | 0.01079137 | Rotarod_Lat | 12 | baseline |
| Rotarod  | 0.01041667 | Rotarod_Lat | 1  | 3        |
| Rotarod  | 0.00898204 | Rotarod_Lat | 2  | 3        |
| Rotarod  | 0.04761905 | Rotarod_Lat | 3  | 3        |
| Rotarod  | 0.01315789 | Rotarod_Lat | 4  | 3        |
| Rotarod  | 0.01376147 | Rotarod_Lat | 5  | 3        |
| Rotarod  | 0.01204819 | Rotarod_Lat | 6  | 3        |
| Rotarod  | 0.00828729 | Rotarod_Lat | 7  | 3        |
| Rotarod  | 0.02362205 | Rotarod_Lat | 8  | 3        |
| Rotarod  | 0.01538462 | Rotarod_Lat | 9  | 3        |
| Rotarod  | 0.00898204 | Rotarod_Lat | 10 | 3        |
| Rotarod  | 0.02912621 | Rotarod_Lat | 11 | 3        |
| Rotarod  | 0.02857143 | Rotarod_Lat | 12 | 3        |
| Rotarod  | 0.01158301 | Rotarod_Lat | 1  | 7        |
| Rotarod  | 0.01195219 | Rotarod_Lat | 2  | 7        |
| Rotarod  | 0.00704225 | Rotarod_Lat | 3  | 7        |
| Rotarod  | 0.01530612 | Rotarod_Lat | 4  | 7        |

|                        |            |             |    |          |
|------------------------|------------|-------------|----|----------|
| Rotarod                | 0.01219512 | Rotarod_Lat | 5  | 7        |
| Rotarod                | 0.01010101 | Rotarod_Lat | 6  | 7        |
| Rotarod                | 0.0078329  | Rotarod_Lat | 7  | 7        |
| Rotarod                | 0.01158301 | Rotarod_Lat | 8  | 7        |
| Rotarod                | 0.00707547 | Rotarod_Lat | 9  | 7        |
| Rotarod                | 0.00977199 | Rotarod_Lat | 10 | 7        |
| Rotarod                | 0.00900901 | Rotarod_Lat | 11 | 7        |
| Rotarod                | 0.01578947 | Rotarod_Lat | 12 | 7        |
| Rotarod                | 0.01075269 | Rotarod_Lat | 1  | 14       |
| Rotarod                | 0.00923077 | Rotarod_Lat | 2  | 14       |
| Rotarod                | 0.00573614 | Rotarod_Lat | 3  | 14       |
| Rotarod                | 0.01145038 | Rotarod_Lat | 4  | 14       |
| Rotarod                | 0.00815217 | Rotarod_Lat | 5  | 14       |
| Rotarod                | 0.00683371 | Rotarod_Lat | 6  | 14       |
| Rotarod                | 0.00674157 | Rotarod_Lat | 7  | 14       |
| Rotarod                | 0.01578947 | Rotarod_Lat | 8  | 14       |
| Rotarod                | 0.02173913 | Rotarod_Lat | 9  | 14       |
| Rotarod                | 0.0096463  | Rotarod_Lat | 10 | 14       |
| Rotarod                | 0.00869565 | Rotarod_Lat | 11 | 14       |
| Rotarod                | 0.01578947 | Rotarod_Lat | 12 | 14       |
| Rotarod                | 0.01016949 | Rotarod_Lat | 1  | 21       |
| Rotarod                | 0.00466563 | Rotarod_Lat | 2  | 21       |
| Rotarod                | 0.00717703 | Rotarod_Lat | 3  | 21       |
| Rotarod                | 0.00806452 | Rotarod_Lat | 4  | 21       |
| Rotarod                | 0.00717703 | Rotarod_Lat | 5  | 21       |
| Rotarod                | 0.00895522 | Rotarod_Lat | 6  | 21       |
| Rotarod                | 0.00791557 | Rotarod_Lat | 7  | 21       |
| Rotarod                | 0.00777202 | Rotarod_Lat | 8  | 21       |
| Rotarod                | 0.01045296 | Rotarod_Lat | 9  | 21       |
| Rotarod                | 0.00714286 | Rotarod_Lat | 10 | 21       |
| Rotarod                | 0.01045296 | Rotarod_Lat | 11 | 21       |
| Rotarod                | 0.01428571 | Rotarod_Lat | 12 | 21       |
| Single Pellet Grasping | 0          | DragDrop    | 1  | baseline |
| Single Pellet Grasping | 10         | DragDrop    | 1  | 4        |
| Single Pellet Grasping | 8          | DragDrop    | 1  | 7        |
| Single Pellet Grasping | 14         | DragDrop    | 1  | 14       |
| Single Pellet Grasping | 8          | DragDrop    | 1  | 21       |
| Single Pellet Grasping | 11         | DragDrop    | 1  | 28       |
| Single Pellet Grasping | 0          | DragDrop    | 2  | baseline |
| Single Pellet Grasping | 21         | DragDrop    | 2  | 4        |
| Single Pellet Grasping | 17         | DragDrop    | 2  | 7        |
| Single Pellet Grasping | 18         | DragDrop    | 2  | 14       |
| Single Pellet Grasping | 16         | DragDrop    | 2  | 21       |
| Single Pellet Grasping | 18         | DragDrop    | 2  | 28       |
| Single Pellet Grasping | 0          | DragDrop    | 3  | baseline |
| Single Pellet Grasping | 20         | DragDrop    | 3  | 4        |
| Single Pellet Grasping | 20         | DragDrop    | 3  | 7        |
| Single Pellet Grasping | 14         | DragDrop    | 3  | 14       |
| Single Pellet Grasping | 16         | DragDrop    | 3  | 21       |
| Single Pellet Grasping | 18         | DragDrop    | 3  | 28       |
| Single Pellet Grasping | 0          | DragDrop    | 4  | baseline |
| Single Pellet Grasping | 20         | DragDrop    | 4  | 4        |

|                           |          |          |   |          |
|---------------------------|----------|----------|---|----------|
| Single Pellet Grasping    | 17       | DragDrop | 4 | 7        |
| Single Pellet Grasping    | 13       | DragDrop | 4 | 14       |
| Single Pellet Grasping NA |          | DragDrop | 4 | 21       |
| Single Pellet Grasping NA |          | DragDrop | 4 | 28       |
| Single Pellet Grasping    | 0        | DragDrop | 5 | baseline |
| Single Pellet Grasping    | 18       | DragDrop | 5 | 4        |
| Single Pellet Grasping    | 15       | DragDrop | 5 | 7        |
| Single Pellet Grasping    | 19       | DragDrop | 5 | 14       |
| Single Pellet Grasping    | 17       | DragDrop | 5 | 21       |
| Single Pellet Grasping    | 12       | DragDrop | 5 | 28       |
| Single Pellet Grasping    | 0        | DragDrop | 6 | baseline |
| Single Pellet Grasping    | 16       | DragDrop | 6 | 4        |
| Single Pellet Grasping    | 19       | DragDrop | 6 | 7        |
| Single Pellet Grasping    | 16       | DragDrop | 6 | 14       |
| Single Pellet Grasping    | 17       | DragDrop | 6 | 21       |
| Single Pellet Grasping    | 16       | DragDrop | 6 | 28       |
| Single Pellet Grasping    | 23.33333 | Fail     | 1 | baseline |
| Single Pellet Grasping    | 40       | Fail     | 1 | 4        |
| Single Pellet Grasping    | 16.66667 | Fail     | 1 | 7        |
| Single Pellet Grasping    | 26.66667 | Fail     | 1 | 14       |
| Single Pellet Grasping    | 20       | Fail     | 1 | 21       |
| Single Pellet Grasping    | 18.33333 | Fail     | 1 | 28       |
| Single Pellet Grasping    | 30       | Fail     | 2 | baseline |
| Single Pellet Grasping    | 48.33333 | Fail     | 2 | 4        |
| Single Pellet Grasping    | 35       | Fail     | 2 | 7        |
| Single Pellet Grasping    | 33.33333 | Fail     | 2 | 14       |
| Single Pellet Grasping    | 43.33333 | Fail     | 2 | 21       |
| Single Pellet Grasping    | 33.33333 | Fail     | 2 | 28       |
| Single Pellet Grasping    | 50       | Fail     | 3 | baseline |
| Single Pellet Grasping    | 43.47826 | Fail     | 3 | 4        |
| Single Pellet Grasping    | 43.33333 | Fail     | 3 | 7        |
| Single Pellet Grasping    | 23.33333 | Fail     | 3 | 14       |
| Single Pellet Grasping    | 30       | Fail     | 3 | 21       |
| Single Pellet Grasping    | 30       | Fail     | 3 | 28       |
| Single Pellet Grasping    | 20       | Fail     | 4 | baseline |
| Single Pellet Grasping    | 33.33333 | Fail     | 4 | 4        |
| Single Pellet Grasping    | 30.35714 | Fail     | 4 | 7        |
| Single Pellet Grasping    | 25       | Fail     | 4 | 14       |
| Single Pellet Grasping NA |          | Fail     | 4 | 21       |
| Single Pellet Grasping NA |          | Fail     | 4 | 28       |
| Single Pellet Grasping    | 20       | Fail     | 5 | baseline |
| Single Pellet Grasping    | 52       | Fail     | 5 | 4        |
| Single Pellet Grasping    | 35       | Fail     | 5 | 7        |
| Single Pellet Grasping    | 38.33333 | Fail     | 5 | 14       |
| Single Pellet Grasping    | 41.66667 | Fail     | 5 | 21       |
| Single Pellet Grasping    | 22.22222 | Fail     | 5 | 28       |
| Single Pellet Grasping    | 36.66667 | Fail     | 6 | baseline |
| Single Pellet Grasping    | 40       | Fail     | 6 | 4        |
| Single Pellet Grasping    | 45       | Fail     | 6 | 7        |
| Single Pellet Grasping    | 30       | Fail     | 6 | 14       |
| Single Pellet Grasping    | 35       | Fail     | 6 | 21       |
| Single Pellet Grasping    | 33.33333 | Fail     | 6 | 28       |

**Suppl. Table 36: Summary of conventional tests**

| Behavior test                   | Parameter    | Day      | Value      | Median     | sd          |
|---------------------------------|--------------|----------|------------|------------|-------------|
| Cylinder                        | Dragging     | baseline | 0.02580492 | 0          | 0.043465278 |
| Cylinder                        | Dragging     | 3        | 0.3216045  | 0.333333   | 0.113574086 |
| Cylinder                        | Dragging     | 7        | 0.33994042 | 0.34       |             |
| Cylinder                        | Dragging     | 14       | 0.2888     | 0.2578     | 0.11782193  |
| Cylinder                        | Dragging     | 21       | 0.30606819 | 0.2958335  | 0.102420194 |
| Cylinder                        | Asymmetry    | baseline | 0.26890908 | 0.26       | 0.211431335 |
| Cylinder                        | Asymmetry    | 3        | 0.67401167 | 0.6685     | 0.166382983 |
| Cylinder                        | Asymmetry    | 7        | 0.63614167 | 0.67775    | 0.114654481 |
| Cylinder                        | Asymmetry    | 14       | 0.7135     | 0.758      | 0.145089001 |
| Cylinder                        | Asymmetry    | 21       | 0.71025641 | 0.755      | 0.177478706 |
| ladder rung                     | FL           | baseline | 0.04497614 | 0.04396857 | 0.013998926 |
| ladder rung                     | FL           | 3        | 0.24760031 | 0.2469717  | 0.040909479 |
| ladder rung                     | FL           | 7        | 0.22181397 | 0.22247055 | 0.048428787 |
| ladder rung                     | FL           | 14       | 0.19823047 | 0.19877985 | 0.034868174 |
| ladder rung                     | FL           | 21       | 0.16414528 | 0.1656541  | 0.045218736 |
| ladder rung                     | ladder rung  | baseline | 0.03358626 | 0.030545   | 0.015616676 |
| ladder rung                     | ladder rung  | 3        | 0.17279198 | 0.16558195 | 0.045312186 |
| ladder rung                     | ladder rung  | 7        | 0.18284434 | 0.1827299  | 0.031428618 |
| ladder rung                     | ladder rung  | 14       | 0.14067025 | 0.14352175 | 0.034509077 |
| ladder rung                     | ladder rung  | 21       | 0.09348814 | 0.08733159 | 0.051885317 |
| Neurolog Score                  | Neurolog Scc | baseline | 0.07142857 | 0          | 0.188982237 |
| Neurolog Score                  | Neurolog Scc | 0        | 3.92857143 | 4          | 0.34503278  |
| Neurolog Score                  | Neurolog Scc | 3        | 1.71428571 | 1.5        | 0.267261242 |
| Neurolog Score                  | Neurolog Scc | 7        | 0.71428571 | 1          | 0.56694671  |
| Neurolog Score                  | Neurolog Scc | 14       | 0.35714286 | 0.5        | 0.243975018 |
| Neurolog Score                  | Neurolog Scc | 21       | 0.21428571 | 0          | 0.267261242 |
| Rotarod                         | Rotarod_Lat  | baseline | 0.00947435 | 0.00921618 | 0.002998449 |
| Rotarod                         | Rotarod_Lat  | 3        | 0.01832991 | 0.01345968 | 0.011837166 |
| Rotarod                         | Rotarod_Lat  | 7        | 0.01077013 | 0.01084201 | 0.002880008 |
| Rotarod                         | Rotarod_Lat  | 14       | 0.01087979 | 0.00943854 | 0.004698944 |
| Rotarod                         | Rotarod_Lat  | 21       | 0.00868592 | 0.00799004 | 0.002426897 |
| Single Pellet Grasping Fail     |              | baseline | 30         | 26.666665  | 11.73787867 |
| Single Pellet Grasping Fail     |              | 4        | 42.8574867 | 41.73913   | 6.648244732 |
| Single Pellet Grasping Fail     |              | 7        | 34.22619   | 35         | 10.23248587 |
| Single Pellet Grasping Fail     |              | 14       | 29.4444433 | 28.333335  | 5.643743373 |
| Single Pellet Grasping Fail     |              | 21       | 34         | 35         | 9.472181346 |
| Single Pellet Grasping Fail     |              | 28       | 27.444442  | 30         | 6.822258514 |
| Single Pellet Grasping DragDrop |              | baseline | 0          | 0          | 0           |
| Single Pellet Grasping DragDrop |              | 4        | 17.5       | 19         | 4.086563348 |
| Single Pellet Grasping DragDrop |              | 7        | 16         | 17         | 4.289522118 |
| Single Pellet Grasping DragDrop |              | 14       | 15.6666667 | 15         | 2.422120283 |
| Single Pellet Grasping DragDrop |              | 21       | 14.8       | 16         | 3.834057903 |
| Single Pellet Grasping DragDrop |              | 28       | 15         | 16         | 3.31662479  |

**Suppl. Table 37: Statistical test of conventional tests**

| <b>Behavior test</b>            | <b>Parameter</b> | <b>group1</b> | <b>group2</b> | <b>p.adj.signif</b> | <b>Stat test</b>      |
|---------------------------------|------------------|---------------|---------------|---------------------|-----------------------|
| Neurolog Score                  | Neurolog Scc     | baseline      | 0             | ****                | Repeat. ANOVA with PH |
| Neurolog Score                  | Neurolog Scc     | baseline      | 3             | ****                | Repeat. ANOVA with PH |
| Neurolog Score                  | Neurolog Scc     | baseline      | 7             | *                   | Repeat. ANOVA with PH |
| Neurolog Score                  | Neurolog Scc     | baseline      | 14            | ns                  | Repeat. ANOVA with PH |
| Neurolog Score                  | Neurolog Scc     | baseline      | 21            | ns                  | Repeat. ANOVA with PH |
| Rotarod                         | Rotarod_Lat      | baseline      | 3             | **                  | Repeat. ANOVA with PH |
| Rotarod                         | Rotarod_Lat      | baseline      | 7             | ns                  | Repeat. ANOVA with PH |
| Rotarod                         | Rotarod_Lat      | baseline      | 14            | ns                  | Repeat. ANOVA with PH |
| Rotarod                         | Rotarod_Lat      | baseline      | 21            | ns                  | Repeat. ANOVA with PH |
| Cylinder                        | Dragging         | baseline      | 3             | ****                | Repeat. ANOVA with PH |
| Cylinder                        | Dragging         | baseline      | 7             | ****                | Repeat. ANOVA with PH |
| Cylinder                        | Dragging         | baseline      | 14            | ****                | Repeat. ANOVA with PH |
| Cylinder                        | Dragging         | baseline      | 21            | ****                | Repeat. ANOVA with PH |
| Cylinder                        | Asymmetry        | baseline      | 3             | ****                | Repeat. ANOVA with PH |
| Cylinder                        | Asymmetry        | baseline      | 7             | ****                | Repeat. ANOVA with PH |
| Cylinder                        | Asymmetry        | baseline      | 14            | ****                | Repeat. ANOVA with PH |
| Cylinder                        | Asymmetry        | baseline      | 21            | ****                | Repeat. ANOVA with PH |
| ladder rung                     | FL               | baseline      | 3             | ****                | Repeat. ANOVA with PH |
| ladder rung                     | FL               | baseline      | 7             | ****                | Repeat. ANOVA with PH |
| ladder rung                     | FL               | baseline      | 14            | ****                | Repeat. ANOVA with PH |
| ladder rung                     | FL               | baseline      | 21            | ****                | Repeat. ANOVA with PH |
| ladder rung                     | ladder rung      | baseline      | 3             | ****                | Repeat. ANOVA with PH |
| ladder rung                     | ladder rung      | baseline      | 7             | ****                | Repeat. ANOVA with PH |
| ladder rung                     | ladder rung      | baseline      | 14            | ****                | Repeat. ANOVA with PH |
| ladder rung                     | ladder rung      | baseline      | 21            | **                  | Repeat. ANOVA with PH |
| Single Pellet Grasping Fail     |                  | baseline      | 4             | ns                  | Repeat. ANOVA with PH |
| Single Pellet Grasping Fail     |                  | baseline      | 7             | ns                  | Repeat. ANOVA with PH |
| Single Pellet Grasping Fail     |                  | baseline      | 14            | ns                  | Repeat. ANOVA with PH |
| Single Pellet Grasping Fail     |                  | baseline      | 21            | ns                  | Repeat. ANOVA with PH |
| Single Pellet Grasping Fail     |                  | baseline      | 28            | ns                  | Repeat. ANOVA with PH |
| Single Pellet Grasping DragDrop |                  | baseline      | 4             | ****                | Repeat. ANOVA with PH |
| Single Pellet Grasping DragDrop |                  | baseline      | 7             | ****                | Repeat. ANOVA with PH |
| Single Pellet Grasping DragDrop |                  | baseline      | 14            | ****                | Repeat. ANOVA with PH |
| Single Pellet Grasping DragDrop |                  | baseline      | 21            | ****                | Repeat. ANOVA with PH |
| Single Pellet Grasping DragDrop |                  | baseline      | 28            | ****                | Repeat. ANOVA with PH |
